# Supplementary material
Source: publisher figshare collection journal article supplement (https://diabetesjournals.figshare.com/ndownloader/files/31765229)
Supplement: Supplementary file 1 [file 31765229]

## Sheet: Table S4A
Table S4A. Differential gene expression analysis between Progressors and Non-progressors at the ‘At clinical diagnosis’ time point in Progressors, in CD4+ T cells
seqnames	start	end	strand	gene_id	gene_type	gene_name	EntrezID	description	Synonyms	Length	logFC	AveExpr	t	P.Value	adj.P.Val	B
chr19	51371606	51372701	-	ENSG00000105374.10	protein_coding	NKG7	4818	natural killer cell granule protein 7	GIG1|GMP-17|p15-TIA-1	921	3.64772	2.405	10.5579	2.20041e-10	2.17344e-06	13.3674
chr3	39263495	39281735	-	ENSG00000168329.14	protein_coding	CX3CR1	1524	C-X3-C motif chemokine receptor 1	CCRL1|CMKBRL1|CMKDR1|GPR13|GPRV28|V28	3656	6.45652	0.269515	10.2175	3.68536e-10	2.17344e-06	10.5627
chr20	24949269	24959928	+	ENSG00000077984.6	protein_coding	CST7	8530	cystatin F	CMAP	891	4.32922	0.828835	7.65233	8.14627e-08	0.000320284	7.22636
chr11	74807739	74949200	-	ENSG00000166435.15	protein_coding	XRRA1	143570	X-ray radiation resistance associated 1	-	9086	1.50115	4.03924	7.47914	1.1014e-07	0.000324774	7.83573
chr14	24606480	24609699	-	ENSG00000100450.13	protein_coding	GZMH	2999	granzyme H	CCP-X|CGL-2|CSP-C|CTLA1|CTSGL2	951	5.69361	0.283459	7.74059	1.61197e-07	0.000380263	6.41224
chr16	57610652	57665580	+	ENSG00000205336.13	protein_coding	ADGRG1	9289	adhesion G protein-coupled receptor G1	BFPP|BPPR|GPR56|TM7LN4|TM7XN1	8659	5.55562	0.569266	7.32011	5.08114e-07	0.000998868	5.62018
chr1	159800511	159816257	+	ENSG00000181036.14	protein_coding	FCRL6	343413	Fc receptor like 6	FcRH6	2677	4.39949	0.0247797	6.78013	6.4282e-07	0.00108315	5.32381
chr20	25452697	25585531	-	ENSG00000101004.15	protein_coding	NINL	22981	ninein like	NLP	6030	1.16521	3.24309	6.3539	1.52167e-06	0.00224352	5.32422
chr17	74326210	74355820	+	ENSG00000196169.15	protein_coding	KIF19	124602	kinesin family member 19	KIF19A	5640	4.36195	-1.66386	6.15471	2.46087e-06	0.00322511	3.31516
chr1	160739057	160754821	+	ENSG00000026751.17	protein_coding	SLAMF7	57823	SLAM family member 7	19A|CD319|CRACC|CS1	4833	2.90874	1.29421	6.03899	3.45191e-06	0.00392789	4.38157
chr1	161541759	161550737	-	ENSG00000203747.12	protein_coding	FCGR3A	2214	Fc fragment of IgG receptor IIIa	CD16|CD16A|FCG3|FCGR3|FCGRIII|FCR-10|FCRIII|FCRIIIA|IGFR3|IMD20	2725	3.87178	0.244846	5.96636	3.89233e-06	0.00392789	3.67635
chr2	68365282	68397453	+	ENSG00000115956.10	protein_coding	PLEK	5341	pleckstrin	P47	3205	3.1552	2.11212	6.36719	3.99616e-06	0.00392789	4.46385
chr4	15960245	15969309	-	ENSG00000137441.8	protein_coding	FGFBP2	83888	fibroblast growth factor binding protein 2	HBP17RP|KSP37	1187	5.07148	1.13949	6.52106	5.41919e-06	0.00486094	4.0192
chr10	132186948	132205759	+	ENSG00000151640.13	protein_coding	DPYSL4	10570	dihydropyrimidinase like 4	CRMP3|DRP-4|ULIP4	3111	5.93982	1.33531	6.31553	5.76966e-06	0.00486094	3.47307
chr14	24630954	24634267	-	ENSG00000100453.13	protein_coding	GZMB	3002	granzyme B	C11|CCPI|CGL-1|CGL1|CSP-B|CSPB|CTLA1|CTSGL1|HLP|SECT	1411	3.6412	0.129304	5.7636	6.4018e-06	0.00503395	3.30662
chr10	70597348	70602759	-	ENSG00000180644.8	protein_coding	PRF1	5551	perforin 1	HPLH2|P1|PFP	2518	2.45654	3.84807	6.31946	9.06476e-06	0.00668243	3.70985
chr3	27715949	27722711	-	ENSG00000163508.13	protein_coding	EOMES	8320	eomesodermin	TBR2	3656	2.46075	1.22316	5.49857	1.23373e-05	0.00855989	3.20788
chr19	46466491	46471563	-	ENSG00000182013.18	protein_coding	PNMA8A	55228	PNMA family member 8A	PNMAL1	3696	4.18005	-1.32642	5.19034	2.6643e-05	0.0161687	1.33505
chrX	6667865	7148158	-	ENSG00000130021.15	protein_coding	PUDP	8226	pseudouridine 5'-phosphatase	DXF68S1E|FAM16AX|GS1|HDHD1|HDHD1A	3821	-0.893857	3.5774	-5.16873	2.81267e-05	0.0161687	2.47045
chr10	15102584	15168693	-	ENSG00000152465.18	protein_coding	NMT2	9397	N-myristoyltransferase 2	-	6470	0.514116	6.57949	5.14795	2.96328e-05	0.0161687	1.94839
chr5	76716126	76735770	+	ENSG00000181104.7	protein_coding	F2R	2149	coagulation factor II thrombin receptor	CF2R|HTR|PAR-1|PAR1|TR	3972	4.09837	-1.18453	5.14039	3.02004e-05	0.0161687	1.60232
chr1	232950605	232983882	+	ENSG00000135778.12	protein_coding	NTPCR	84284	nucleoside-triphosphatase, cancer-related	C1orf57|HCR-NTPase|THEP1	15854	-0.900933	5.59694	-5.22425	3.02613e-05	0.0161687	2.07952
chr9	69820817	69906227	+	ENSG00000204711.9	protein_coding	C9orf135	138255	chromosome 9 open reading frame 135	-	1250	-4.07243	-0.327315	-5.12326	3.15286e-05	0.0161687	1.57381
chr10	132036336	132184858	+	ENSG00000188385.12	protein_coding	JAKMIP3	282973	Janus kinase and microtubule interacting protein 3	C10orf14|C10orf39|Jamip3|NECC2|bA140A10.5	14669	2.22109	1.64557	5.13752	3.56678e-05	0.0175292	2.36894
chr2	144364364	144521057	-	ENSG00000169554.22	protein_coding	ZEB2	9839	zinc finger E-box binding homeobox 2	HSPC082|SIP-1|SIP1|SMADIP1|ZFHX1B	26111	4.22795	1.16618	5.33443	4.87503e-05	0.0230004	2.04297
chr1	157794403	157820120	-	ENSG00000163534.15	protein_coding	FCRL1	115350	Fc receptor like 1	CD307a|FCRH1|IFGP1|IRTA5	3950	-1.80863	2.28472	-4.91932	5.2677e-05	0.0238922	1.98862
chr2	85394753	85418432	-	ENSG00000042493.16	protein_coding	CAPG	822	capping actin protein, gelsolin like	AFCP|HEL-S-66|MCP	2419	-1.23796	3.37563	-4.90444	5.46919e-05	0.0238922	1.83876
chr3	32105689	32168709	+	ENSG00000152642.11	protein_coding	GPD1L	23171	glycerol-3-phosphate dehydrogenase 1 like	GPD1-L	4697	-0.78603	4.97482	-4.88395	5.75921e-05	0.0239283	1.55136
chr9	126326829	126507041	+	ENSG00000196814.15	protein_coding	MVB12B	89853	multivesicular body subunit 12B	C9orf28|FAM125B	7904	0.998604	2.85833	4.87551	5.88318e-05	0.0239283	1.83635
chr22	39349925	39385575	+	ENSG00000100321.15	protein_coding	SYNGR1	9145	synaptogyrin 1	-	6940	1.59902	2.14649	4.71417	8.84247e-05	0.0347656	1.51365
chrX	18675909	18827921	+	ENSG00000086717.18	protein_coding	PPEF1	5475	protein phosphatase with EF-hand domain 1	PP7|PPEF|PPP7C|PPP7CA	3513	3.14142	-0.433613	4.66801	9.93704e-05	0.0378088	0.568653
chr5	72107234	72209565	+	ENSG00000131711.15	protein_coding	MAP1B	4131	microtubule associated protein 1B	FUTSCH|MAP5|PPP1R102|PVNH9	12540	-3.25076	-1.02186	-4.63937	0.000106832	0.0389658	0.505941
chr17	47733236	47746122	+	ENSG00000073861.3	protein_coding	TBX21	30009	T-box transcription factor 21	T-PET|T-bet|TBET|TBLYM	2625	3.59415	0.722494	4.87469	0.000109018	0.0389658	1.31571
chr1	184387029	184629019	+	ENSG00000116667.15	protein_coding	C1orf21	81563	chromosome 1 open reading frame 21	PIG13	11594	3.03033	-0.728006	4.57827	0.000124686	0.0413497	0.878395
chr2	241551424	241574131	+	ENSG00000176720.6	protein_coding	BOK	666	BCL2 family apoptosis regulator BOK	BCL2L9|BOKL	2680	1.84472	0.379286	4.57812	0.000124733	0.0413497	1.08939
chr1	27612064	27635185	-	ENSG00000000938.13	protein_coding	FGR	2268	FGR proto-oncogene, Src family tyrosine kinase	SRC2|c-fgr|c-src2|p55-Fgr|p55c-fgr|p58-Fgr|p58c-fgr	3382	2.98792	2.23208	4.93596	0.000129548	0.0413497	1.26412
chr1	15409888	15430339	+	ENSG00000142634.13	protein_coding	EFHD2	79180	EF-hand domain family member D2	SWS1	2534	0.707937	5.93676	4.59658	0.000131094	0.0413497	0.544536
chr7	3301252	4269000	+	ENSG00000146555.19	protein_coding	SDK1	221935	sidekick cell adhesion molecule 1	-	12258	1.38938	2.75102	4.55211	0.000133217	0.0413497	1.08188
chr2	85685175	85698852	+	ENSG00000115523.17	protein_coding	GNLY	10578	granulysin	D2S69E|LAG-2|LAG2|NKG5|TLA519	3047	4.13608	2.86187	5.10685	0.000143908	0.0432108	1.16019
chr12	121209861	121234106	+	ENSG00000135124.15	protein_coding	P2RX4	5025	purinergic receptor P2X 4	P2X4|P2X4R	8155	-0.472108	5.51379	-4.51443	0.000146539	0.0432108	0.473194
chr11	113797874	113875570	-	ENSG00000048028.11	protein_coding	USP28	57646	ubiquitin specific peptidase 28	-	5719	0.566759	4.73715	4.43975	0.000177009	0.0509224	0.4241
chr9	136844415	136848801	+	ENSG00000232434.2	protein_coding	AJM1	389813	apical junction component 1 homolog	C9orf172|ajm-1	4387	1.70621	1.62947	4.3924	0.000199527	0.0560339	0.769175
chr19	57351271	57359898	+	ENSG00000131845.15	protein_coding	ZNF304	57343	zinc finger protein 304	-	4645	0.698511	4.51368	4.37525	0.000208371	0.0568839	0.363579
chr6	79631329	79703655	+	ENSG00000198478.8	protein_coding	SH3BGRL2	83699	SH3 domain binding glutamate rich protein like 2	-	4603	-2.78648	-0.0764334	-4.36805	0.000212199	0.0568839	0.463033
chr15	40087890	40108892	-	ENSG00000104081.14	protein_coding	BMF	90427	Bcl2 modifying factor	-	5447	1.17849	2.86358	4.34126	0.000227073	0.0595185	0.561453
chr4	121667946	121696995	-	ENSG00000164111.15	protein_coding	ANXA5	308	annexin A5	ANX5|ENX2|HEL-S-7|PP4|RPRGL3	2925	-0.9608	4.15521	-4.32217	0.000254629	0.0633644	0.202509
chr12	10226058	10329608	+	ENSG00000134539.17	protein_coding	KLRD1	3824	killer cell lectin like receptor D1	CD94	17412	3.74598	0.716629	4.54261	0.000254757	0.0633644	0.56976
chr1	92473043	92486925	-	ENSG00000162676.12	protein_coding	GFI1	2672	growth factor independent 1 transcriptional repressor	GFI-1|GFI1A|SCN2|ZNF163	5069	0.974658	4.70771	4.40809	0.000257863	0.0633644	0.110666
chr19	7868719	7874390	-	ENSG00000183248.12	protein_coding	PRR36	80164	proline rich 36	-	4467	-1.79975	0.434163	-4.24501	0.000289596	0.0697099	0.315354
chr4	124501	202303	+	ENSG00000250312.8	protein_coding	ZNF718	255403	zinc finger protein 718	-	5073	0.960122	3.71081	4.22065	0.00030797	0.0726501	0.130279
chr16	31259967	31332892	+	ENSG00000169896.18	protein_coding	ITGAM	3684	integrin subunit alpha M	CD11B|CR3A|MAC-1|MAC1A|MO1A|SLEB6	5688	3.37863	1.65718	4.45732	0.000404154	0.0934706	0.237173
chr3	50674927	51384198	+	ENSG00000088538.13	protein_coding	DOCK3	1795	dedicator of cytokinesis 3	MOCA|NEDIDHA|PBP	9069	1.2217	3.23203	4.13028	0.000416286	0.0944248	-0.0819087
chr10	124007668	124093598	-	ENSG00000182022.18	protein_coding	CHST15	51363	carbohydrate sulfotransferase 15	BRAG|GALNAC4S-6ST	6543	-2.13999	0.610467	-4.08659	0.00043187	0.0961113	-0.0202632
chrX	154675249	154751583	-	ENSG00000160219.12	protein_coding	GAB3	139716	GRB2 associated binding protein 3	-	5272	0.712743	3.66429	4.07615	0.000443379	0.0968455	-0.272958
chr21	43414483	43427131	-	ENSG00000142178.9	protein_coding	SIK1	150094	salt inducible kinase 1	MSK|SIK|SIK-1|SIK1B|SNF1LK	5210	-2.08047	0.65949	-4.05743	0.000464772	0.0996726	-0.0660725
chrX	103376395	103378164	+	ENSG00000166681.14	protein_coding	BEX3	27018	brain expressed X-linked 3	Bex|DXS6984E|HGR74|NADE|NGFRAP1	1112	-1.04123	4.97092	-4.22038	0.000477065	0.100482	-0.470665
chr16	22479121	22536521	+	ENSG00000243716.10	protein_coding	NPIPB5	100132247	nuclear pore complex interacting protein family member B5	-	10005	-0.515548	7.24178	-4.02649	0.000511322	0.105808	-0.921258
chr22	46267961	46294008	+	ENSG00000075234.17	protein_coding	TTC38	55020	tetratricopeptide repeat domain 38	LL22NC03-5H6.5	3578	1.22678	2.75622	4.01012	0.000523526	0.106465	-0.239683
chr2	174348022	174395712	-	ENSG00000138433.16	protein_coding	CIR1	9541	corepressor interacting with RBPJ, CIR1	CIR	3178	-0.424417	5.57588	-3.94638	0.000614463	0.1213	-0.946063
chr17	3672199	3696240	-	ENSG00000083454.22	protein_coding	P2RX5	5026	purinergic receptor P2X 5	LRH-1|P2X5|P2X5R	4026	-0.667865	3.61365	-3.94471	0.000617042	0.1213	-0.58164
chr11	36296288	36465204	+	ENSG00000135362.14	protein_coding	PRR5L	79899	proline rich 5 like	PROTOR2	6616	2.41655	0.808836	3.9742	0.000647205	0.12346	-0.273753
chr4	110045846	110199199	-	ENSG00000170522.10	protein_coding	ELOVL6	79071	ELOVL fatty acid elongase 6	FACE|FAE|LCE	7274	1.30806	1.98639	3.92461	0.000648963	0.12346	-0.299873
chr3	50329782	50340980	-	ENSG00000068028.17	protein_coding	RASSF1	11186	Ras association domain family member 1	123F2|NORE2A|RASSF1A|RDA32|REH3P21	3683	0.50117	5.43677	3.89575	0.000697676	0.13062	-1.04617
chr9	112040783	112175297	-	ENSG00000106868.17	protein_coding	SUSD1	64420	sushi domain containing 1	-	4074	0.798362	3.11549	3.87792	0.000729564	0.13269	-0.618098
chr3	108589705	108694840	+	ENSG00000198919.13	protein_coding	DZIP3	9666	DAZ interacting zinc finger protein 3	PPP1R66|UURF2|hRUL138	6943	0.417847	5.67895	3.87701	0.000731231	0.13269	-1.10779
chr17	74466399	74484794	+	ENSG00000167851.15	protein_coding	CD300A	11314	CD300a molecule	CLM-8|CMRF-35-H9|CMRF-35H|CMRF35-H|CMRF35-H9|CMRF35H|CMRF35H9|IGSF12|IRC1|IRC1/IRC2|IRC2|IRp60	2701	1.38901	2.94102	3.95284	0.000804549	0.143507	-0.682768
chr8	25184689	25418082	+	ENSG00000147459.18	protein_coding	DOCK5	80005	dedicator of cytokinesis 5	-	15989	3.07048	-1.20134	3.83168	0.000819085	0.143507	-0.838685
chr6	43509702	43562419	+	ENSG00000171453.20	protein_coding	POLR1C	9533	RNA polymerase I and III subunit C	AC40|HLD11|RPA39|RPA40|RPA5|RPAC1|RPC40|TCS3	5505	-0.548147	5.06746	-3.82557	0.00083171	0.143507	-1.124
chr10	70098223	70132934	-	ENSG00000042286.15	protein_coding	AIFM2	84883	apoptosis inducing factor mitochondria associated 2	AMID|FSP1|PRG3	5135	0.76349	3.45986	3.82184	0.000839508	0.143507	-0.811294
chr17	39904595	39919854	-	ENSG00000073605.18	protein_coding	GSDMB	55876	gasdermin B	GSDMB-1|GSDML|PP4052|PRO2521	5905	0.460762	7.05841	3.8069	0.000871446	0.146398	-1.43487
chr11	60842113	60851081	+	ENSG00000110104.13	protein_coding	CCDC86	79080	coiled-coil domain containing 86	-	3342	-0.618909	3.88185	-3.79798	0.000891093	0.146398	-0.9484
chr8	11842524	11869448	-	ENSG00000164733.21	protein_coding	CTSB	1508	cathepsin B	APPS|CPSB|RECEUP	7317	0.496581	6.91205	3.80153	0.000893654	0.146398	-1.44822
chr4	36281616	36347511	+	ENSG00000197057.10	protein_coding	DTHD1	401124	death domain containing 1	-	7379	2.29531	-0.015007	3.78112	0.000929405	0.150169	-0.750394
chr2	96325331	96330517	+	ENSG00000198885.9	protein_coding	ITPRIPL1	150771	ITPRIP like 1	KIAA1754L	4652	2.72613	0.326548	3.7949	0.000942157	0.150172	-0.672816
chr11	110429948	110464884	+	ENSG00000137714.3	protein_coding	FDX1	2230	ferredoxin 1	ADX|FDX|LOH11CR1D	3144	-0.492013	4.34329	-3.75242	0.0009984	0.157015	-1.17765
chr6	28224886	28233487	+	ENSG00000137185.13	protein_coding	ZSCAN9	7746	zinc finger and SCAN domain containing 9	PRD51|ZNF193	3710	-2.93491	-0.670844	-3.76001	0.00102228	0.158358	-0.792121
chr13	102799119	102841533	+	ENSG00000134897.14	protein_coding	BIVM	54841	basic, immunoglobulin-like variable motif containing	-	7952	-0.811768	3.28951	-3.73845	0.00103379	0.158358	-0.957282
chr4	67558727	67607337	+	ENSG00000035720.8	protein_coding	STAP1	26228	signal transducing adaptor family member 1	BRDG1|STAP-1	1951	-0.792304	3.87451	-3.73215	0.00105015	0.158801	-1.11164
chr7	12686856	12690958	+	ENSG00000122644.13	protein_coding	ARL4A	10124	ADP ribosylation factor like GTPase 4A	ARL4	3585	-1.03988	3.09985	-3.70579	0.00112141	0.166199	-0.973903
chrX	20006713	20116907	-	ENSG00000184368.16	protein_coding	MAP7D2	256714	MAP7 domain containing 2	-	4366	-3.46884	-0.58146	-3.72593	0.00112725	0.166199	-1.00262
chr2	11677595	11827409	+	ENSG00000134324.12	protein_coding	LPIN1	23175	lipin 1	PAP1	11861	0.356547	7.48284	3.69277	0.00115833	0.168673	-1.73066
chr7	144355288	144380632	+	ENSG00000050327.15	protein_coding	ARHGEF5	7984	Rho guanine nucleotide exchange factor 5	GEF5|P60|TIM|TIM1	5818	-1.089	1.89064	-3.66333	0.00124627	0.179265	-0.919138
chrX	103576231	103587736	+	ENSG00000133142.17	protein_coding	TCEAL4	79921	transcription elongation factor A like 4	NPD017|WEX7	2518	-0.720633	3.74305	-3.64464	0.00130549	0.1818	-1.28415
chr9	132161676	132244526	+	ENSG00000196358.11	protein_coding	NTNG2	84628	netrin G2	LHLL9381|Lmnt2|NEDBASH|NTNG1|bA479K20.1	7726	1.18011	2.23485	3.64449	0.00130596	0.1818	-0.984963
chrX	49171898	49175235	+	ENSG00000102007.11	protein_coding	PLP2	5355	proteolipid protein 2	A4|A4LSB	1303	-0.453512	5.0969	-3.64099	0.00131735	0.1818	-1.61315
chr4	102630770	102760994	-	ENSG00000109323.11	protein_coding	MANBA	4126	mannosidase beta	MANB1	11743	-0.500049	5.5526	-3.63819	0.00132655	0.1818	-1.67227
chr7	26667068	26995239	-	ENSG00000005020.13	protein_coding	SKAP2	8935	src kinase associated phosphoprotein 2	PRAP|RA70|SAPS|SCAP2|SKAP-HOM|SKAP55R	5361	0.838453	2.23683	3.62927	0.00135622	0.1818	-1.04704
chr6	158650014	158764876	+	ENSG00000164674.15	protein_coding	SYTL3	94120	synaptotagmin like 3	SLP3	2896	-0.461152	5.54048	-3.62923	0.00135637	0.1818	-1.68206
chr1	11934205	11975538	+	ENSG00000083444.17	protein_coding	PLOD1	5351	procollagen-lysine,2-oxoglutarate 5-dioxygenase 1	EDS6|EDSKCL1|LH|LH1|LLH|PLOD	5320	1.50067	1.71987	3.62181	0.00138154	0.182008	-0.990687
chrX	69616067	70039472	+	ENSG00000158813.18	protein_coding	EDA	1896	ectodysplasin A	ECTD1|ED1|ED1-A1|ED1-A2|EDA-A1|EDA-A2|EDA1|EDA2|HED|HED1|ODT1|STHAGX1|TNLG7C|XHED|XLHED	7002	-1.30597	1.36758	-3.6197	0.00138879	0.182008	-0.962754
chr17	76672551	76711016	-	ENSG00000182534.13	protein_coding	MXRA7	439921	matrix remodeling associated 7	-	9257	1.91846	1.16042	3.61431	0.00144228	0.184991	-0.989296
chr17	74670578	74747335	+	ENSG00000172794.20	protein_coding	RAB37	326624	RAB37, member RAS oncogene family	-	5072	0.450171	5.92249	3.60427	0.00144291	0.184991	-1.83129
chr17	6996049	7010754	+	ENSG00000108839.12	protein_coding	ALOX12	239	arachidonate 12-lipoxygenase, 12S type	12-LOX|12S-LOX|LOG12	2650	0.553225	3.5839	3.58623	0.00150883	0.190988	-1.40964
chr12	49539030	49558337	+	ENSG00000135519.8	protein_coding	KCNH3	23416	potassium voltage-gated channel subfamily H member 3	BEC1|ELK2|Kv12.2	4496	-0.65892	3.4762	-3.5827	0.00152207	0.190988	-1.40595
chr5	55102646	55110252	+	ENSG00000145649.8	protein_coding	GZMA	3001	granzyme A	CTLA3|HFSP	896	1.60482	2.79658	3.72736	0.00155669	0.193156	-1.23871
chr7	12330885	12403941	-	ENSG00000146530.14	protein_coding	VWDE	221806	von Willebrand factor D and EGF domains	-	6712	-4.11924	0.636136	-3.7333	0.0015721	0.193156	-1.08049
chr1	157745733	157777132	-	ENSG00000132704.16	protein_coding	FCRL2	79368	Fc receptor like 2	CD307b|FCRH2|IFGP4|IRTA4|SPAP1|SPAP1A|SPAP1B|SPAP1C	5058	-2.42834	0.328007	-3.5611	0.00160557	0.195234	-1.12906
chr11	8612037	8682694	-	ENSG00000166436.16	protein_coding	TRIM66	9866	tripartite motif containing 66	C11orf29|TIF1D|TIF1DELTA	11752	0.486497	6.60958	3.562	0.00163826	0.197176	-2.01778
chrX	44873188	45112779	+	ENSG00000147050.16	protein_coding	KDM6A	7403	lysine demethylase 6A	KABUK2|UTX|bA386N14.2	23882	-0.627074	6.86958	-3.63132	0.00168595	0.200428	-1.99314
chr14	104865268	104896770	+	ENSG00000099814.16	protein_coding	CEP170B	283638	centrosomal protein 170B	CEP170R|FAM68C|KIAA0284	7211	1.03377	2.78511	3.53141	0.00172772	0.200428	-1.37996
chr5	1456480	1523962	-	ENSG00000153395.10	protein_coding	LPCAT1	79888	lysophosphatidylcholine acyltransferase 1	AGPAT10|AGPAT9|AYTL2|LPCAT-1|PFAAP3|lpcat|lysoPAFAT	6475	1.38866	0.749047	3.52818	0.00174154	0.200428	-1.16093
chr16	30222937	30254510	-	ENSG00000198064.13	protein_coding	NPIPB13	613037	nuclear pore complex interacting protein family, member B13	-	5202	-0.88481	2.28242	-3.5264	0.00174921	0.200428	-1.26294
chr6	166409364	166906451	-	ENSG00000071242.12	protein_coding	RPS6KA2	6196	ribosomal protein S6 kinase A2	HU-2|MAPKAPK1C|RSK|RSK3|S6K-alpha|S6K-alpha2|p90-RSK3|p90RSK2|pp90RSK3	8251	0.527402	4.91666	3.52616	0.00175024	0.200428	-1.82329
chrX	20124525	20141838	-	ENSG00000173674.11	protein_coding	EIF1AX	1964	eukaryotic translation initiation factor 1A X-linked	EIF1A|EIF1AP1|EIF4C|eIF-1A|eIF-4C	4414	-0.514837	5.79391	-3.51757	0.00178772	0.202751	-1.97507
chr1	150796208	150808260	-	ENSG00000143387.13	protein_coding	CTSK	1513	cathepsin K	CTS02|CTSO|CTSO1|CTSO2|PKND|PYCD	1824	-0.779351	3.37352	-3.51037	0.00181972	0.204415	-1.54831
chr3	129555214	129606676	-	ENSG00000004399.13	protein_coding	PLXND1	23129	plexin D1	PLEXD1	9557	0.935658	2.72321	3.49753	0.00187823	0.208998	-1.44903
chr22	37675636	37679802	+	ENSG00000100097.12	protein_coding	LGALS1	3956	galectin 1	GAL1|GBP	1067	0.994773	2.58743	3.48386	0.0019425	0.213226	-1.44894
chr1	91680343	91906335	-	ENSG00000069702.11	protein_coding	TGFBR3	7049	transforming growth factor beta receptor 3	BGCAN|betaglycan	8577	1.26022	3.42736	3.60346	0.00195781	0.213226	-1.57911
chr12	104455295	104762014	+	ENSG00000171310.11	protein_coding	CHST11	50515	carbohydrate sulfotransferase 11	C4ST|C4ST-1|C4ST1|HSA269537|OCBMD	6492	-0.473484	5.05987	-3.47805	0.00197047	0.213226	-1.99258
chr11	114059711	114256765	+	ENSG00000109906.14	protein_coding	ZBTB16	7704	zinc finger and BTB domain containing 16	PLZF|ZNF145	12343	-1.53334	1.49416	-3.47121	0.00200388	0.213315	-1.2963
chr1	26361634	26374522	-	ENSG00000176083.18	protein_coding	ZNF683	257101	zinc finger protein 683	Hobit	2379	2.56967	-0.996854	3.46872	0.00201622	0.213315	-1.34777
chrX	71095851	71103532	+	ENSG00000184481.17	protein_coding	FOXO4	4303	forkhead box O4	AFX|AFX1|MLLT7	3790	0.475199	4.99835	3.46684	0.00202554	0.213315	-1.99826
chr8	42152946	42171673	+	ENSG00000070718.12	protein_coding	AP3M2	10947	adaptor related protein complex 3 subunit mu 2	AP47B|CLA20|P47B	6276	-0.437351	6.41253	-3.4537	0.00209199	0.218363	-2.23365
chr18	69400888	69849087	+	ENSG00000206052.11	protein_coding	DOK6	220164	docking protein 6	DOK5L|HsT3226	9554	0.889644	3.26856	3.43687	0.00218023	0.225103	-1.58008
chr3	119211732	119240946	-	ENSG00000121578.13	protein_coding	B4GALT4	8702	beta-1,4-galactosyltransferase 4	B4Gal-T4|beta4Gal-T4	6988	0.451524	6.20313	3.43017	0.00221636	0.225103	-2.26908
chr19	52860851	52897693	-	ENSG00000182986.14	protein_coding	ZNF320	162967	zinc finger protein 320	ZFPL	11302	0.45931	5.19063	3.42911	0.00222217	0.225103	-2.09652
chr13	79481124	79556075	+	ENSG00000102471.14	protein_coding	NDFIP2	54602	Nedd4 family interacting protein 2	N4WBP5A	4994	-0.723599	3.19761	-3.42448	0.00224754	0.225103	-1.68903
chr14	74903951	74923302	-	ENSG00000198208.12	protein_coding	RPS6KL1	83694	ribosomal protein S6 kinase like 1	RSKL2	7526	0.605139	3.63008	3.42367	0.00225199	0.225103	-1.7839
chr17	39921041	39927601	-	ENSG00000172057.10	protein_coding	ORMDL3	94103	ORMDL sphingolipid biosynthesis regulator 3	-	3752	0.435077	7.58448	3.41455	0.00233467	0.231171	-2.41401
chr19	9523223	9538645	-	ENSG00000130818.12	protein_coding	ZNF426	79088	zinc finger protein 426	K-RBP	7546	0.434426	4.76411	3.40596	0.00235189	0.231171	-2.06523
chr16	28605196	28623625	-	ENSG00000196502.11	protein_coding	SULT1A1	6817	sulfotransferase family 1A member 1	HAST1/HAST2|P-PST|PST|ST1A1|ST1A3|STP|STP1|TSPST1	8909	-0.54265	5.15047	-3.40028	0.00238481	0.232469	-2.16787
chr11	2400488	2403878	+	ENSG00000184281.15	protein_coding	TSSC4	10078	tumor suppressing subtransferable candidate 4	-	2659	0.499713	5.29223	3.39132	0.00243766	0.234514	-2.22872
chr4	102501331	102617302	+	ENSG00000109320.13	protein_coding	NFKB1	4790	nuclear factor kappa B subunit 1	CVID12|EBP-1|KBF1|NF-kB|NF-kB1|NF-kappa-B1|NF-kappaB|NF-kappabeta|NFKB-p105|NFKB-p50|NFkappaB	6359	-0.335632	7.23255	-3.38925	0.00245007	0.234514	-2.4501
chr4	105369077	105474067	-	ENSG00000138777.20	protein_coding	PPA2	27068	inorganic pyrophosphatase 2	HSPC124|SCFAI|SCFI|SID6-306	4640	-0.485109	5.17274	-3.38669	0.00246543	0.234514	-2.18967
chr17	47694081	47712050	+	ENSG00000198933.9	protein_coding	TBKBP1	9755	TBK1 binding protein 1	ProSAPiP2|SINTBAD	4280	1.59085	2.13628	3.41299	0.00254489	0.236238	-1.5582
chr4	183099257	183320777	+	ENSG00000151718.16	protein_coding	WWC2	80014	WW and C2 domain containing 2	BOMB	10002	-0.770172	3.13571	-3.37201	0.00255552	0.236238	-1.83146
chr3	42489299	42537573	+	ENSG00000114812.13	protein_coding	VIPR1	7433	vasoactive intestinal peptide receptor 1	HVR1|II|PACAP-R-2|PACAP-R2|RDC1|V1RG|VAPC1|VIP-R-1|VIPR|VIRG|VPAC1|VPAC1R|VPCAP1R	7384	-0.504723	7.02181	-3.40544	0.00256187	0.236238	-2.45449
chr18	5392381	5630700	-	ENSG00000082397.17	protein_coding	EPB41L3	23136	erythrocyte membrane protein band 4.1 like 3	4.1B|DAL-1|DAL1	12203	4.3333	0.854671	3.61841	0.00256367	0.236238	-1.39208
chrX	101098218	101163681	+	ENSG00000102384.13	protein_coding	CENPI	2491	centromere protein I	CENP-I|FSHPRH1|LRPR1	4321	-2.2188	-0.660634	-3.36165	0.00262101	0.23965	-1.64926
chr3	50362799	50504244	-	ENSG00000007402.11	protein_coding	CACNA2D2	9254	calcium voltage-gated channel auxiliary subunit alpha2delta 2	CACNA2D|CASVDD	6322	0.56086	3.67189	3.35737	0.00264852	0.240303	-1.96266
chr1	154325553	154351304	+	ENSG00000143515.18	protein_coding	ATP8B2	57198	ATPase phospholipid transporting 8B2	ATPID	7622	-0.266504	8.82728	-3.34126	0.00275468	0.248027	-2.61192
chr21	14216130	14228372	+	ENSG00000185272.14	protein_coding	RBM11	54033	RNA binding motif protein 11	-	2360	0.964855	3.21997	3.33288	0.00281153	0.251227	-1.84006
chr15	74409289	74433958	-	ENSG00000138623.10	protein_coding	SEMA7A	8482	semaphorin 7A (John Milton Hagen blood group)	CD108|CDw108|H-SEMA-K1|H-Sema-L|JMH|SEMAK1|SEMAL	3800	-0.928642	1.57271	-3.30736	0.00299172	0.265174	-1.6732
chr16	71447597	71463095	-	ENSG00000167377.18	protein_coding	ZNF23	7571	zinc finger protein 23	KOX16|ZNF359|ZNF612|Zfp612	7285	0.855817	2.06786	3.30151	0.00303461	0.265174	-1.72353
chr17	4143168	4187310	+	ENSG00000167740.10	protein_coding	CYB5D2	124936	cytochrome b5 domain containing 2	-	2182	0.52284	3.26479	3.30084	0.00303952	0.265174	-1.9956
chr1	212726153	212791782	-	ENSG00000117697.15	protein_coding	NSL1	25936	NSL1 component of MIS12 kinetochore complex	C1orf48|DC8|MIS14	13867	-0.370306	5.88362	-3.29841	0.00305754	0.265174	-2.51894
chr2	28894667	28948219	+	ENSG00000163811.12	protein_coding	WDR43	23160	WD repeat domain 43	NET12|UTP5	4103	-0.328767	6.40907	-3.28215	0.00318072	0.27226	-2.63054
chr15	99715697	99733561	-	ENSG00000183060.15	protein_coding	LYSMD4	145748	LysM domain containing 4	-	5697	-0.431579	5.42175	-3.28154	0.00318541	0.27226	-2.4945
chr7	100802565	100827523	-	ENSG00000196411.10	protein_coding	EPHB4	2050	EPH receptor B4	CMAVM2|HFASD|HTK|LMPHM7|MYK1|TYRO11	6437	-0.484406	5.19438	-3.27092	0.00326856	0.277357	-2.46022
chr1	20482391	20486210	-	ENSG00000162545.6	protein_coding	CAMK2N1	55450	calcium/calmodulin dependent protein kinase II inhibitor 1	PRO1489	2605	2.01552	0.0237263	3.26387	0.00332493	0.280126	-1.74419
chr11	74171267	74254703	+	ENSG00000214517.10	protein_coding	PPME1	51400	protein phosphatase methylesterase 1	ABDH19|PME-1	7749	-0.467972	4.57527	-3.25745	0.00337706	0.281271	-2.39113
chr4	122923070	123319433	+	ENSG00000145375.9	protein_coding	SPATA5	166378	spermatogenesis associated 5	AFG2|EHLMRS|SPAF	9313	-0.554424	3.77498	-3.25501	0.00339712	0.281271	-2.1963
chr9	132592997	132670401	-	ENSG00000125485.17	protein_coding	DDX31	64794	DEAD-box helicase 31	PPP1R25	5546	-0.483676	4.74918	-3.2476	0.00345859	0.281271	-2.45187
chr5	80960363	81230162	+	ENSG00000113319.13	protein_coding	RASGRF2	5924	Ras protein specific guanine nucleotide releasing factor 2	GRF2|RAS-GRF2	11032	0.452075	7.09486	3.25976	0.00348968	0.281271	-2.76702
chr7	36512941	36724549	-	ENSG00000136250.12	protein_coding	AOAH	313	acyloxyacyl hydrolase	-	3518	0.522033	4.74123	3.24218	0.00350426	0.281271	-2.46828
chr6	38168451	38640148	-	ENSG00000183826.18	protein_coding	BTBD9	114781	BTB domain containing 9	dJ322I12.1	9537	0.399657	5.16867	3.23986	0.00352396	0.281271	-2.54602
chr17	39687914	39730426	+	ENSG00000141736.13	protein_coding	ERBB2	2064	erb-b2 receptor tyrosine kinase 2	CD340|HER-2|HER-2/neu|HER2|MLN 19|NEU|NGL|TKR1	10321	0.732009	3.25645	3.23653	0.00355253	0.281271	-2.15483
chr19	40440844	40444335	-	ENSG00000167565.13	protein_coding	SERTAD3	29946	SERTA domain containing 3	RBT1	1848	1.92447	0.692283	3.23294	0.00358349	0.281271	-1.7702
chr5	37106228	37249421	-	ENSG00000197603.15	protein_coding	CPLANE1	65250	ciliogenesis and planar polarity effector 1	C5orf42|Hug|JBTS17|OFD6	21352	0.473757	5.05323	3.23174	0.0035939	0.281271	-2.54283
chr19	46774883	46788594	-	ENSG00000105281.12	protein_coding	SLC1A5	6510	solute carrier family 1 member 5	AAAT|ASCT2|ATBO|M7V1|M7VS1|R16|RDRC	3332	1.18787	1.20581	3.22944	0.00361397	0.281271	-1.80944
chr22	41469117	41528989	+	ENSG00000100412.16	protein_coding	ACO2	50	aconitase 2	ACONM|HEL-S-284|ICRD|OCA8|OPA9	4049	0.360643	5.66726	3.2289	0.00361864	0.281271	-2.6633
chr16	57542643	57591681	+	ENSG00000159618.16	protein_coding	ADGRG5	221188	adhesion G protein-coupled receptor G5	GPR114|PGR27	5630	1.50359	1.29408	3.23603	0.00362963	0.281271	-1.84747
chr11	86441108	86672636	-	ENSG00000151376.16	protein_coding	ME3	10873	malic enzyme 3	NADP-ME	3838	-0.62369	3.79277	-3.22414	0.00366055	0.281271	-2.28327
chr18	45983536	46072272	-	ENSG00000152229.18	protein_coding	PSTPIP2	9050	proline-serine-threonine phosphatase interacting protein 2	MAYP	4120	0.404369	4.89177	3.22252	0.00367487	0.281271	-2.53615
chr22	43999211	44172939	+	ENSG00000188677.15	protein_coding	PARVB	29780	parvin beta	CGI-56	7368	-0.953754	1.81495	-3.22012	0.00369622	0.281271	-1.8928
chr11	6926404	7001004	+	ENSG00000149054.16	protein_coding	ZNF215	7762	zinc finger protein 215	BAZ-2|BAZ2|ZKSCAN11|ZSCAN43	5968	2.77182	-0.432844	3.21264	0.00381447	0.284992	-1.89535
chr1	115048011	115089503	-	ENSG00000134198.10	protein_coding	TSPAN2	10100	tetraspanin 2	NET3|TSN2|TSPAN-2	3413	1.22741	2.04446	3.20678	0.00381726	0.284992	-1.95023
chr1	149782689	149812373	-	ENSG00000203814.6	protein_coding	H2BC18	440689	H2B clustered histone 18	HIST2H2BF	3196	2.85843	0.402804	3.25143	0.0038428	0.284992	-1.827
chrX	71910818	72161750	+	ENSG00000204131.9	protein_coding	NHSL2	340527	NHS like 2	-	17706	1.41555	2.02641	3.21913	0.00387805	0.284992	-1.95128
chr13	48488959	48533256	-	ENSG00000136161.12	protein_coding	RCBTB2	1102	RCC1 and BTB domain containing protein 2	CHC1L|RLG	3545	0.595227	3.91773	3.1993	0.00388678	0.284992	-2.31779
chr8	22687659	22693480	-	ENSG00000179388.9	protein_coding	EGR3	1960	early growth response 3	EGR-3|PILOT	5033	2.71854	-1.11772	3.19795	0.0038994	0.284992	-2.0191
chr2	179101678	179264832	-	ENSG00000187231.14	protein_coding	SESTD1	91404	SEC14 and spectrin domain containing 1	SOLO	11405	1.04363	3.64163	3.25524	0.00391426	0.284992	-2.23991
chr13	46125920	46211871	-	ENSG00000136167.15	protein_coding	LCP1	3936	lymphocyte cytosolic protein 1	CP64|HEL-S-37|L-PLASTIN|LC64P|LPL|PLS2	5076	0.30776	9.5077	3.19377	0.0039389	0.285027	-2.96286
chr1	28259518	28282491	+	ENSG00000130766.5	protein_coding	SESN2	83667	sestrin 2	HI95|SES2|SEST2	3462	0.933141	2.41605	3.1846	0.00402693	0.287668	-2.10822
chrX	119588337	119606443	-	ENSG00000186416.17	protein_coding	NKRF	55922	NFKB repressing factor	ITBA4|NRF	4552	-0.686424	4.19915	-3.19115	0.00403018	0.287668	-2.47418
chr7	95404862	95435329	-	ENSG00000105854.13	protein_coding	PON2	5445	paraoxonase 2	-	3844	-0.670263	3.57867	-3.18237	0.00404856	0.287668	-2.32042
chr11	43680680	43856617	+	ENSG00000149084.13	protein_coding	HSD17B12	51144	hydroxysteroid 17-beta dehydrogenase 12	KAR|SDR12C1	7716	0.611017	4.19145	3.17475	0.0041236	0.290312	-2.46872
chr12	14803666	14906586	+	ENSG00000182993.5	protein_coding	C12orf60	144608	chromosome 12 open reading frame 60	-	4518	-0.999435	2.16874	-3.1736	0.00413501	0.290312	-2.03344
chr6	52264014	52284881	-	ENSG00000112118.20	protein_coding	MCM3	4172	minichromosome maintenance complex component 3	HCC5|P1-MCM3|P1.h|RLFB	3645	0.426004	6.1809	3.15952	0.00427737	0.29853	-2.91456
chr10	75210154	75231448	+	ENSG00000165637.13	protein_coding	VDAC2	7417	voltage dependent anion channel 2	POR	2827	-0.675597	3.58449	-3.14345	0.00444575	0.305416	-2.39809
chr20	63981132	64033100	+	ENSG00000101161.8	protein_coding	PRPF6	24148	pre-mRNA processing factor 6	ANT-1|ANT1|C20orf14|Prp6|RP60|SNRNP102|TOM|U5-102K|hPrp6	3047	0.30373	7.16993	3.14032	0.00447925	0.305416	-3.02908
chr10	73772276	73780251	+	ENSG00000196968.11	protein_coding	FUT11	170384	fucosyltransferase 11	FUCTXI	4925	0.613559	4.08934	3.13988	0.00448396	0.305416	-2.5569
chr17	58301228	58328795	-	ENSG00000005379.17	protein_coding	TSPOAP1	9256	TSPO associated protein 1	BZRAP1|PBR-IP|PRAX-1|PRAX1|RIM-BP1|RIMBP1	11389	0.516859	4.77823	3.13715	0.00451347	0.305416	-2.71769
chr21	46324141	46445769	+	ENSG00000160299.17	protein_coding	PCNT	5116	pericentrin	KEN|MOPD2|PCN|PCNT2|PCNTB|PCTN2|SCKL4	11641	0.295796	7.03951	3.13528	0.00453369	0.305416	-3.03175
chr9	136673143	136687457	-	ENSG00000169692.13	protein_coding	AGPAT2	10555	1-acylglycerol-3-phosphate O-acyltransferase 2	1-AGPAT2|BSCL|BSCL1|LPAAB|LPAAT-beta	1832	-0.77266	2.72713	-3.13457	0.00454149	0.305416	-2.2526
chr11	62662817	62672255	-	ENSG00000162194.12	protein_coding	LBHD1	79081	LBH domain containing 1	C11orf48	3362	-0.638493	4.10868	-3.13292	0.00455946	0.305416	-2.54665
chr12	108515277	108525837	+	ENSG00000198855.7	protein_coding	FICD	11153	FIC domain protein adenylyltransferase	HIP13|HYPE|UNQ3041	4175	-0.776438	2.29128	-3.13075	0.00458318	0.305416	-2.19829
chr19	33795933	33815763	+	ENSG00000153885.14	protein_coding	KCTD15	79047	potassium channel tetramerization domain containing 15	-	6388	2.84031	-1.86846	3.12818	0.00461155	0.30558	-2.1324
chr11	124752583	124762290	-	ENSG00000149564.12	protein_coding	ESAM	90952	endothelial cell adhesion molecule	W117m	2920	-1.44507	0.697172	-3.12404	0.00465759	0.305592	-1.98552
chr8	22245133	22254601	+	ENSG00000168495.13	protein_coding	POLR3D	661	RNA polymerase III subunit D	BN51T|C53|RPC4|RPC53|TSBN51	5583	0.340384	6.1089	3.1235	0.00466355	0.305592	-2.96214
chr5	33986165	34008104	-	ENSG00000242110.8	protein_coding	AMACR	23600	alpha-methylacyl-CoA racemase	AMACRD|CBAS4|P504S|RACE|RM	4847	1.19495	0.940615	3.11903	0.00471381	0.307179	-2.00164
chr19	647526	663233	-	ENSG00000070423.18	protein_coding	RNF126	55658	ring finger protein 126	-	3452	-0.330003	7.05877	-3.115	0.00475948	0.308253	-3.07801
chr14	31446036	31457506	-	ENSG00000129480.13	protein_coding	DTD2	112487	D-aminoacyl-tRNA deacylase 2	ATD|C14orf126	2967	0.888303	2.49317	3.11157	0.00479871	0.308253	-2.22187
chr17	7856685	7885238	-	ENSG00000183011.13	protein_coding	NAA38	84316	N-alpha-acetyltransferase 38, NatC auxiliary subunit	LSMD1|MAK31|PFAAP2	1943	0.647479	3.46225	3.1107	0.00480869	0.308253	-2.43597
chr9	136975092	136981742	+	ENSG00000107317.13	protein_coding	PTGDS	5730	prostaglandin D2 synthase	L-PGDS|LPGDS|PDS|PGD2|PGDS|PGDS2	2712	3.47288	-0.695941	3.18983	0.00486199	0.308788	-2.02337
chrX	15790472	15823260	+	ENSG00000169249.13	protein_coding	ZRSR2	8233	zinc finger CCCH-type, RNA binding motif and serine/arginine rich 2	U2AF1-RS2|U2AF1L2|U2AF1RS2|URP|ZC3H22	2077	-0.718055	5.47756	-3.19446	0.0048694	0.308788	-2.8355
chr10	96304409	96338564	+	ENSG00000107447.8	protein_coding	DNTT	1791	DNA nucleotidylexotransferase	TDT	1959	1.92793	1.04361	3.12484	0.00495866	0.312767	-2.0478
chr16	87406246	87493024	-	ENSG00000140948.13	protein_coding	ZCCHC14	23174	zinc finger CCHC-type containing 14	BDG-29|BDG29	8369	-0.369852	6.27778	-3.09426	0.00500156	0.313794	-3.06505
chr2	102311529	102398775	+	ENSG00000115604.10	protein_coding	IL18R1	8809	interleukin 18 receptor 1	CD218a|CDw218a|IL-18R-alpha|IL-18Ralpha|IL-1Rrp|IL18RA|IL18Ralpha2|IL1RRP	4353	-0.830631	2.94342	-3.08902	0.00506453	0.316064	-2.39774
chr19	43766533	43781257	-	ENSG00000104783.14	protein_coding	KCNN4	3783	potassium calcium-activated channel subfamily N member 4	DHS2|IK|IK1|IKCA1|KCA4|KCa3.1|SK4|hIKCa1|hKCa4|hSK4	3404	-0.566753	4.41194	-3.08632	0.00509723	0.316431	-2.78057
chr20	32192504	32207743	-	ENSG00000126003.7	protein_coding	PLAGL2	5326	PLAG1 like zinc finger 2	ZNF900	5656	0.48024	4.52927	3.07422	0.00524658	0.322415	-2.80535
chr17	68511780	68551319	+	ENSG00000108946.15	protein_coding	PRKAR1A	5573	protein kinase cAMP-dependent type I regulatory subunit alpha	ACRDYS1|ADOHR|CAR|CNC|CNC1|PKR1|PPNAD1|PRKAR1|TSE1	6821	0.268104	6.60614	3.07197	0.00527484	0.322415	-3.14086
chr11	129899706	130002835	-	ENSG00000170325.14	protein_coding	PRDM10	56980	PR/SET domain 10	PFM7|TRIS	6626	0.400273	4.53926	3.071	0.00528711	0.322415	-2.80748
chr22	39223359	39244982	-	ENSG00000100311.17	protein_coding	PDGFB	5155	platelet derived growth factor subunit B	IBGC5|PDGF-2|PDGF2|SIS|SSV|c-sis	3992	2.14238	1.15186	3.10616	0.00530297	0.322415	-2.08525
chr5	74766991	74780113	+	ENSG00000164346.10	protein_coding	NSA2	10412	NSA2 ribosome biogenesis factor	CDK105|HCL-G1|HCLG1|HUSSY-29|HUSSY29|TINP1	4962	-0.348768	7.30738	-3.06139	0.00540957	0.327016	-3.21156
chr6	152121684	152637801	-	ENSG00000131018.24	protein_coding	SYNE1	23345	spectrin repeat containing nuclear envelope protein 1	8B|AMC3|AMCM|ARCA1|C6orf98|CPG2|EDMD4|KASH1|MYNE1|Nesp1|SCAR8|dJ45H2.2	46686	0.245816	8.58821	3.05949	0.0054341	0.327016	-3.26127
chr5	151100706	151157785	-	ENSG00000197043.14	protein_coding	ANXA6	309	annexin A6	ANX6|CBP68|CPB-II|p68|p70	5478	0.346448	8.70098	3.05311	0.00551723	0.330334	-3.27733
chrX	103309346	103311007	-	ENSG00000133134.12	protein_coding	BEX2	84707	brain expressed X-linked 2	BEX1|DJ79P11.1	1137	-0.47249	5.21153	-3.04687	0.00559978	0.333442	-2.97302
chr17	44673069	44689779	-	ENSG00000180329.14	protein_coding	CCDC43	124808	coiled-coil domain containing 43	-	2855	-0.440256	4.18459	-3.04358	0.00564373	0.333442	-2.78906
chr8	73939169	73972287	-	ENSG00000154582.17	protein_coding	ELOC	6921	elongin C	SIII|TCEB1	4934	-0.5554	3.40947	-3.04282	0.00565396	0.333442	-2.62429
chr2	240479422	240569209	-	ENSG00000144504.15	protein_coding	ANKMY1	51281	ankyrin repeat and MYND domain containing 1	ZMYND13	11477	0.339196	5.74707	3.03343	0.00578165	0.339276	-3.13234
chr11	118253416	118264536	-	ENSG00000149573.9	protein_coding	MPZL2	10205	myelin protein zero like 2	DFNB111|EVA|EVA1	4740	1.46471	0.938729	3.02973	0.00583257	0.339947	-2.17098
chr18	31129236	31162856	-	ENSG00000134765.10	protein_coding	DSC1	1823	desmocollin 1	CDHF1|DG2/DG3	4271	1.31768	2.89219	3.10758	0.00586233	0.339947	-2.46922
chr14	67386984	67412167	-	ENSG00000100558.9	protein_coding	PLEK2	26499	pleckstrin 2	-	1569	-1.44608	0.366562	-3.02552	0.00589115	0.339947	-2.17914
chr1	212858275	212899363	+	ENSG00000162769.13	protein_coding	FLVCR1	28982	FLVCR heme transporter 1	AXPC1|FLVCR|MFSD7B|PCA|PCARP|SLC49A1	6422	-0.546201	4.18541	-3.02427	0.00590877	0.339947	-2.84019
chr21	42199689	42297244	+	ENSG00000160179.19	protein_coding	ABCG1	9619	ATP binding cassette subfamily G member 1	ABC8|WHITE1	6121	0.509116	5.18757	3.02798	0.00593718	0.339947	-3.06015
chr6	113857345	113863475	+	ENSG00000277443.3	protein_coding	MARCKS	4082	myristoylated alanine rich protein kinase C substrate	80K-L|MACS|PKCSL|PRKCSL	4296	-2.27491	-1.0028	-3.01368	0.00605912	0.343725	-2.34266
chr4	56647988	56681899	-	ENSG00000171476.22	protein_coding	HOPX	84525	HOP homeobox	CAMEO|HOD|HOP|LAGY|NECC1|OB1|SMAP31|TOTO	7753	2.60581	-0.720473	3.02988	0.00606144	0.343725	-2.21633
chr14	24426545	24430954	-	ENSG00000139899.11	protein_coding	CBLN3	643866	cerebellin 3 precursor	PRO1486	2692	-1.25422	1.03612	-3.00793	0.00614222	0.344295	-2.23419
chr10	6010689	6062370	-	ENSG00000134460.18	protein_coding	IL2RA	3559	interleukin 2 receptor subunit alpha	CD25|IDDM10|IL2R|IMD41|TCGFR|p55	3962	-0.914055	3.41039	-3.02894	0.00619772	0.344295	-2.66578
chr9	136850943	136860799	+	ENSG00000177943.14	protein_coding	MAMDC4	158056	MAM domain containing 4	AEGP|EDTB	5490	0.563081	3.54683	3.00178	0.00623229	0.344295	-2.6817
chr2	233475520	233566782	-	ENSG00000085982.13	protein_coding	USP40	55230	ubiquitin specific peptidase 40	-	9352	-0.320616	5.58879	-2.9989	0.006275	0.344295	-3.16949
chr19	45178784	45216933	+	ENSG00000189114.8	protein_coding	BLOC1S3	388552	biogenesis of lysosomal organelles complex 1 subunit 3	BLOS3|HPS8|RP	3376	-0.472792	3.92255	-2.99715	0.00630107	0.344295	-2.83953
chr20	270863	290778	-	ENSG00000196476.12	protein_coding	C20orf96	140680	chromosome 20 open reading frame 96	dJ1103G7.2	1730	-0.718878	2.75658	-2.99368	0.00635293	0.344295	-2.58425
chr1	149928651	149936879	-	ENSG00000014914.21	protein_coding	MTMR11	10903	myotubularin related protein 11	CRA	4572	2.23572	-0.852859	2.99327	0.00635919	0.344295	-2.42632
chr11	108222832	108369102	+	ENSG00000149311.19	protein_coding	ATM	472	ATM serine/threonine kinase	AT1|ATA|ATC|ATD|ATDC|ATE|TEL1|TELO1	23695	0.31	10.7305	2.99151	0.00638563	0.344295	-3.43109
chrX	16719612	16765340	+	ENSG00000169895.6	protein_coding	SYAP1	94056	synapse associated protein 1	BSTA|PRO3113	6442	-0.439289	5.0388	-2.99032	0.00640376	0.344295	-3.0872
chr12	10116777	10130258	-	ENSG00000172243.18	protein_coding	CLEC7A	64581	C-type lectin domain containing 7A	BGR|CANDF4|CD369|CLECSF12|DECTIN1|SCARE2	4190	2.99734	-0.843324	2.98906	0.00642287	0.344295	-2.41467
chr7	100572228	100573900	-	ENSG00000205307.12	protein_coding	SAP25	100316904	Sin3A associated protein 25	-	1468	-1.80855	-0.540275	-2.98624	0.0064658	0.344295	-2.27036
chr13	114234887	114272723	+	ENSG00000130177.16	protein_coding	CDC16	8881	cell division cycle 16	ANAPC6|APC6|CDC16Hs|CUT9	3959	0.31428	7.17798	2.98621	0.0064663	0.344295	-3.37504
chrX	15688830	15788411	+	ENSG00000169239.13	protein_coding	CA5B	11238	carbonic anhydrase 5B	CA-VB|CAVB	8522	-0.466535	5.53473	-2.98928	0.00646881	0.344295	-3.19502
chr1	119648411	119744218	+	ENSG00000092621.13	protein_coding	PHGDH	26227	phosphoglycerate dehydrogenase	3-PGDH|3PGDH|HEL-S-113|NLS|NLS1|PDG|PGAD|PGD|PGDH|PHGDHD|SERA	9187	-0.579148	3.68081	-2.98426	0.00649606	0.344295	-2.81478
chr16	4696510	4734378	-	ENSG00000168096.15	protein_coding	ANKS3	124401	ankyrin repeat and sterile alpha motif domain containing 3	-	7868	-0.329097	5.21152	-2.9834	0.00650936	0.344295	-3.14898
chr3	38453890	38493142	+	ENSG00000114739.14	protein_coding	ACVR2B	93	activin A receptor type 2B	ACTRIIB|ActR-IIB|HTX4	15705	-0.62286	6.10709	-3.04626	0.00679021	0.356962	-3.25054
chr2	127257290	127294166	-	ENSG00000163161.14	protein_coding	ERCC3	2071	ERCC excision repair 3, TFIIH core complex helicase subunit	BTF2|GTF2H|RAD25|TFIIH|TTD2|XPB	8412	-0.255204	6.99397	-2.96432	0.00680936	0.356962	-3.41684
chr12	111034165	111350554	+	ENSG00000111249.14	protein_coding	CUX2	23316	cut like homeobox 2	CDP2|CUTL2|EIEE67	7507	-1.26002	0.937488	-2.96205	0.0068459	0.357289	-2.35123
chr1	203626787	203744081	+	ENSG00000058668.15	protein_coding	ATP2B4	493	ATPase plasma membrane Ca2+ transporting 4	ATP2B2|MXRA1|PMCA4|PMCA4b|PMCA4x	9495	0.387162	7.00255	2.96347	0.00689843	0.358445	-3.43405
chr19	6661253	6670588	-	ENSG00000125735.11	protein_coding	TNFSF14	8740	TNF superfamily member 14	CD258|HVEML|LIGHT|LTg	4780	1.94701	0.231364	2.95668	0.00693313	0.358668	-2.31204
chr1	40300489	40317813	-	ENSG00000049089.15	protein_coding	COL9A2	1298	collagen type IX alpha 2 chain	DJ39G22.4|EDM2|MED|STL5	4215	-0.949995	1.56194	-2.95235	0.00700417	0.360761	-2.40939
chr11	8106056	8169055	-	ENSG00000166405.15	protein_coding	RIC3	79608	RIC3 acetylcholine receptor chaperone	AYST720|PRO1385	7694	-0.381365	6.0573	-2.94795	0.00707716	0.36104	-3.3687
chr9	113373419	113376999	-	ENSG00000119431.9	protein_coding	HDHD3	81932	haloacid dehalogenase like hydrolase domain containing 3	2810435D12Rik|C9orf158	2105	-0.393554	4.98278	-2.94522	0.0071229	0.36104	-3.18496
chr10	73007217	73096974	-	ENSG00000122884.12	protein_coding	P4HA1	5033	prolyl 4-hydroxylase subunit alpha 1	P4HA	3093	-0.450283	4.44117	-2.9449	0.00712815	0.36104	-3.05872
chr2	24819169	24919839	-	ENSG00000138031.14	protein_coding	ADCY3	109	adenylate cyclase 3	AC-III|AC3|BMIQ19	6058	0.389878	4.81826	2.94467	0.00713204	0.36104	-3.14067
chr13	51813347	51845177	-	ENSG00000281106.4	protein_coding	TMEM272	283521	transmembrane protein 272	LINC00282|NCRNA00282	4153	0.570707	5.30033	2.97265	0.00722133	0.363473	-3.2343
chr20	50731580	50756795	+	ENSG00000124171.9	protein_coding	PARD6B	84612	par-6 family cell polarity regulator beta	PAR6B	4690	-0.858393	2.1249	-2.93705	0.00726104	0.363473	-2.5234
chr17	45254393	45262094	-	ENSG00000184361.13	protein_coding	SPATA32	124783	spermatogenesis associated 32	AEP2|C17orf46|TEX34|VAD1.2	1928	0.754857	2.18482	2.93638	0.00727255	0.363473	-2.57598
chr1	174159410	174995308	+	ENSG00000152061.23	protein_coding	RABGAP1L	9910	RAB GTPase activating protein 1 like	HHL|TBC1D18	16071	-0.265271	6.43256	-2.93066	0.00737093	0.364528	-3.44284
chr11	71865509	71928654	-	ENSG00000254469.7	protein_coding	AP002495.1	NA	NA	NA	3651	0.626005	2.83081	2.92975	0.0073868	0.364528	-2.67776
chr17	1464186	1492686	-	ENSG00000197879.17	protein_coding	MYO1C	4641	myosin IC	MMI-beta|MMIb|NMI|myr2	7806	-0.47037	3.83565	-2.92861	0.00740667	0.364528	-2.98951
chr11	44726465	44932423	+	ENSG00000157570.12	protein_coding	TSPAN18	90139	tetraspanin 18	TSPAN	6014	-0.310259	5.89263	-2.9265	0.00744334	0.364528	-3.39713
chr11	34915829	35020591	+	ENSG00000110435.12	protein_coding	PDHX	8050	pyruvate dehydrogenase complex component X	DLDBP|E3BP|OPDX|PDHXD|PDX1|proX	3720	-0.418958	4.83826	-2.9242	0.00748373	0.364528	-3.18253
chr13	41216369	41263577	-	ENSG00000120662.16	protein_coding	MTRF1	9617	mitochondrial translation release factor 1	MRF1|MTTRF1|RF1	3841	-0.433829	6.18472	-2.92849	0.00752804	0.364528	-3.4133
chr15	74630558	74696292	-	ENSG00000179151.13	protein_coding	EDC3	80153	enhancer of mRNA decapping 3	LSM16|MRT50|YJDC|YJEFN2|hYjeF_N2-15q23	5089	0.316527	5.2235	2.91913	0.00757334	0.364528	-3.29026
chr4	6909242	7033118	+	ENSG00000132405.19	protein_coding	TBC1D14	57533	TBC1 domain family member 14	-	6260	0.356395	5.89797	2.91896	0.00757646	0.364528	-3.41401
chr12	15620134	15882329	-	ENSG00000151491.14	protein_coding	EPS8	2059	epidermal growth factor receptor pathway substrate 8	DFNB102	8540	-1.05855	0.972085	-2.9178	0.0075971	0.364528	-2.42659
chrX	49269793	49301461	+	ENSG00000049769.14	protein_coding	PPP1R3F	89801	protein phosphatase 1 regulatory subunit 3F	HB2E|LL0XNC01-7P3.1|R3F	4378	0.345133	4.91135	2.91748	0.00760271	0.364528	-3.22683
chrX	56818298	56995827	-	ENSG00000204271.13	protein_coding	SPIN3	169981	spindlin family member 3	SPIN-3|TDRD27|bA445O16.1	15841	-0.396168	5.83171	-2.91386	0.00766757	0.364894	-3.39324
chr15	44665732	44711316	-	ENSG00000229474.6	protein_coding	PATL2	197135	PAT1 homolog 2	OOMD4|Pat1a|hPat1a	4771	0.36927	5.8101	2.91361	0.00767221	0.364894	-3.40789
chr9	127706988	127716002	+	ENSG00000160401.15	protein_coding	CFAP157	286207	cilia and flagella associated protein 157	C9orf117	4704	1.37249	0.515993	2.91017	0.0077342	0.366365	-2.4017
chr12	93467488	93516214	+	ENSG00000198015.13	protein_coding	MRPL42	28977	mitochondrial ribosomal protein L42	HSPC204|L31MT|L42MT|MRP-L31|MRP-L42|MRP-S32|MRPL31|MRPS32|PTD007|RPML31|S32MT	16394	-0.355444	6.55501	-2.90776	0.00777804	0.366547	-3.49492
chr16	3222325	3236221	-	ENSG00000010539.12	protein_coding	ZNF200	7752	zinc finger protein 200	-	7498	0.52899	4.72596	2.90768	0.00780019	0.366547	-3.2217
chr7	150791285	150801360	-	ENSG00000106565.18	protein_coding	TMEM176B	28959	transmembrane protein 176B	LR8|MS4B2	1979	2.59289	-0.526032	2.90321	0.00786147	0.36669	-2.49609
chr12	106991364	107093549	-	ENSG00000008405.12	protein_coding	CRY1	1407	cryptochrome circadian regulator 1	DSPD|PHLL1	4782	0.432138	5.3333	2.903	0.00786542	0.36669	-3.34064
chr7	28995235	29195451	-	ENSG00000106066.15	protein_coding	CPVL	54504	carboxypeptidase vitellogenic like	HVLP	3336	3.20639	-1.28372	2.90398	0.00794501	0.368942	-2.56717
chr12	50175788	50283546	-	ENSG00000050405.13	protein_coding	LIMA1	51474	LIM domain and actin binding 1	EPLIN|LDLCQ8|SREBP3	6317	0.413727	4.29124	2.89316	0.00804869	0.371823	-3.15331
chr4	139495941	139606699	-	ENSG00000145391.13	protein_coding	SETD7	80854	SET domain containing 7, histone lysine methyltransferase	KMT7|SET7|SET7/9|SET9	13916	-0.68886	3.65765	-2.89203	0.00807009	0.371823	-2.977
chr11	924894	1012245	+	ENSG00000183020.14	protein_coding	AP2A2	161	adaptor related protein complex 2 subunit alpha 2	ADTAB|CLAPA2|HIP-9|HIP9|HYPJ	9638	1.07671	1.92633	2.88746	0.00815686	0.373944	-2.61544
chr17	32492522	32877177	-	ENSG00000176658.17	protein_coding	MYO1D	4642	myosin ID	PPP1R108|myr4	8188	-0.788099	2.97107	-2.88627	0.00817952	0.373944	-2.85335
chr9	127866486	127877675	-	ENSG00000106992.19	protein_coding	AK1	203	adenylate kinase 1	HTL-S-58j	2593	1.00906	3.27872	2.93095	0.0083054	0.377255	-2.9107
chr3	126988594	127037392	+	ENSG00000114554.11	protein_coding	PLXNA1	5361	plexin A1	NOV|NOVP|PLEXIN-A1|PLXN1	10944	0.281721	5.54328	2.8792	0.00831591	0.377255	-3.4413
chr17	49598884	49678163	-	ENSG00000121067.19	protein_coding	SPOP	8405	speckle type BTB/POZ protein	BTBD32|NEDMACE|NEDMIDF|NSDVS1|NSDVS2|TEF2	6506	-0.263139	6.31332	-2.87539	0.00839037	0.379174	-3.54966
chr10	45727200	45792964	+	ENSG00000172661.19	protein_coding	WASHC2C	253725	WASH complex subunit 2C	FAM21A|FAM21C|VPEF	5705	-0.263804	5.86799	-2.87197	0.00845755	0.380573	-3.5073
chr1	42456117	42473385	+	ENSG00000127125.9	protein_coding	PPCS	79717	phosphopantothenoylcysteine synthetase	CMD2C	3412	0.31588	5.7222	2.87034	0.00848983	0.380573	-3.47329
chr9	127867850	127906022	-	ENSG00000257524.6	protein_coding	AL157935.2	NA	NA	NA	3815	0.848171	3.42245	2.89608	0.0085442	0.380573	-3.01084
chr3	188947214	189325304	+	ENSG00000188001.10	protein_coding	TPRG1	285386	tumor protein p63 regulated 1	FAM79B	9538	1.77645	0.0763287	2.86729	0.0085504	0.380573	-2.4903
chr17	6684719	6713377	-	ENSG00000141485.17	protein_coding	SLC13A5	284111	solute carrier family 13 member 5	EIEE25|INDY|NACT|mIndy	8824	-1.71016	-0.792187	-2.85125	0.00887636	0.393597	-2.53381
chr16	1938210	1943326	-	ENSG00000198736.11	protein_coding	MSRB1	51734	methionine sulfoxide reductase B1	HSPC270|SELR|SELX|SEPX1|SepR	2157	0.836549	2.38809	2.84669	0.00897113	0.39559	-2.76121
chr5	127042558	127073492	-	ENSG00000164241.13	protein_coding	C5orf63	401207	chromosome 5 open reading frame 63	YDR286C	7190	-0.470255	5.12307	-2.84439	0.00901931	0.39559	-3.42829
chr17	410325	431062	+	ENSG00000187624.9	protein_coding	C17orf97	400566	chromosome 17 open reading frame 97	CK20|LIAT1	2712	-1.23549	1.1514	-2.84364	0.00903494	0.39559	-2.58234
chr11	3087107	3166739	-	ENSG00000021762.20	protein_coding	OSBPL5	114879	oxysterol binding protein like 5	OBPH1|ORP5	7473	0.490451	4.75879	2.84267	0.00905548	0.39559	-3.35996
chr2	231198546	231376848	+	ENSG00000135931.18	protein_coding	ARMC9	80210	armadillo repeat containing 9	ARM|JBTS30|KU-MEL-1|NS21	11672	1.64059	-0.45669	2.83621	0.00919259	0.400098	-2.57754
chr1	9539465	9585173	+	ENSG00000171612.7	protein_coding	SLC25A33	84275	solute carrier family 25 member 33	BMSC-MCP|PNC1	3865	-0.645681	2.68918	-2.83231	0.00927621	0.401497	-2.86467
chr7	2558972	2614733	+	ENSG00000106012.18	protein_coding	IQCE	23288	IQ motif containing E	1700028P05Rik|PAPA7	9239	0.420743	4.27074	2.83155	0.0092928	0.401497	-3.27222
chr1	24899511	24965121	-	ENSG00000020633.19	protein_coding	RUNX3	864	RUNX family transcription factor 3	AML2|CBFA3|PEBP2aC	4922	0.248645	7.64922	2.8295	0.00933714	0.40194	-3.75173
chr9	83938311	83956986	-	ENSG00000165118.15	protein_coding	C9orf64	84267	chromosome 9 open reading frame 64	-	2754	0.767148	2.55275	2.82747	0.00938125	0.40237	-2.91272
chr9	127716079	127731590	+	ENSG00000167094.16	protein_coding	TTC16	158248	tetratricopeptide repeat domain 16	-	6347	0.728322	4.56924	2.88482	0.00943444	0.402919	-3.33639
chrX	3604340	3713649	-	ENSG00000183943.6	protein_coding	PRKX	5613	protein kinase X-linked	PKX1	6523	-0.517736	7.08078	-2.8832	0.00955068	0.402919	-3.67728
chr2	85837120	85905199	-	ENSG00000115525.18	protein_coding	ST3GAL5	8869	ST3 beta-galactoside alpha-2,3-sialyltransferase 5	SATI|SIAT9|SIATGM3S|SPDRS|ST3Gal V|ST3GalV	16300	0.412862	5.94794	2.82251	0.00955733	0.402919	-3.62601
chr12	66347431	67069162	-	ENSG00000155974.12	protein_coding	GRIP1	23426	glutamate receptor interacting protein 1	FRASRS3|GRIP	6570	-0.502834	3.26194	-2.81732	0.00960498	0.402919	-3.03662
chrX	154348524	154374638	-	ENSG00000196924.18	protein_coding	FLNA	2316	filamin A	ABP-280|ABPX|CSBS|CVD1|FGS2|FLN|FLN-A|FLN1|FMD|MNS|NHBP|OPD|OPD1|OPD2|XLVD|XMVD	10642	0.293889	10.2339	2.81677	0.00961726	0.402919	-3.81705
chr1	44800377	44805990	+	ENSG00000173846.13	protein_coding	PLK3	1263	polo like kinase 3	CNK|FNK|PLK-3|PRK	3327	-0.445655	6.27743	-2.83651	0.00962103	0.402919	-3.66045
chr19	48180770	48255946	-	ENSG00000105483.18	protein_coding	CARD8	22900	caspase recruitment domain family member 8	CARDINAL|DACAR|DAKAR|NDPP|NDPP1|TUCAN	13219	0.282326	8.353	2.81605	0.00963317	0.402919	-3.79916
chr11	61680391	61747001	+	ENSG00000134780.10	protein_coding	DAGLA	747	diacylglycerol lipase alpha	C11orf11|DAGL(ALPHA)|DAGLALPHA|NSDDR	5799	1.17258	1.09313	2.81028	0.00976297	0.406905	-2.62377
chr4	1166932	1208962	-	ENSG00000159674.12	protein_coding	SPON2	10417	spondin 2	DIL-1|DIL1|M-SPONDIN|MINDIN	5985	1.62228	3.1324	2.94821	0.00988427	0.408555	-3.03121
chr11	62611722	62615116	+	ENSG00000149489.9	protein_coding	ROM1	6094	retinal outer segment membrane protein 1	ROM|ROSP1|RP7|TSPAN23	1977	1.15518	0.445353	2.80477	0.00988844	0.408555	-2.59902
chr1	113390515	113685923	+	ENSG00000081026.19	protein_coding	MAGI3	260425	membrane associated guanylate kinase, WW and PDZ domain containing 3	MAGI-3|dJ730K3.2	8414	-0.499139	3.05803	-2.80316	0.00992551	0.408555	-3.06993
chr2	100820139	100996829	+	ENSG00000170485.17	protein_coding	NPAS2	4862	neuronal PAS domain protein 2	MOP4|PASD4|bHLHe9	12504	-0.489028	4.34888	-2.80248	0.0099411	0.408555	-3.36198
chr9	128920966	128942041	+	ENSG00000175287.19	protein_coding	PHYHD1	254295	phytanoyl-CoA dioxygenase domain containing 1	-	2844	1.18313	1.42684	2.8003	0.00999139	0.409196	-2.67695
chr19	38244035	38292615	+	ENSG00000167642.13	protein_coding	SPINT2	10653	serine peptidase inhibitor, Kunitz type 2	DIAR3|HAI-2|HAI2|Kop|PB	5085	-0.388074	4.85648	-2.79327	0.0101553	0.413597	-3.48904
chr22	41922032	41926806	-	ENSG00000159958.7	protein_coding	TNFRSF13C	115650	TNF receptor superfamily member 13C	BAFF-R|BAFFR|BROMIX|CD268|CVID4|prolixin	3923	-0.669972	2.41807	-2.79269	0.010169	0.413597	-2.93267
chr18	69831158	69961803	-	ENSG00000150637.9	protein_coding	CD226	10666	CD226 molecule	DNAM-1|DNAM1|PTA1|TLiSA1	13659	0.660361	6.84846	2.89876	0.0102419	0.414105	-3.69224
chr1	112701127	112707434	-	ENSG00000155366.17	protein_coding	RHOC	389	ras homolog family member C	ARH9|ARHC|H9|RHOH9	4007	0.823865	1.99046	2.78919	0.0102517	0.414105	-2.82012
chrX	17800049	17861337	-	ENSG00000131831.18	protein_coding	RAI2	10742	retinoic acid induced 2	-	2622	-2.08846	-0.893259	-2.78672	0.0103102	0.414262	-2.6373
chr12	98645290	98735433	+	ENSG00000120868.14	protein_coding	APAF1	317	apoptotic peptidase activating factor 1	APAF-1|CED4	7759	0.339816	5.62295	2.78606	0.0103261	0.414262	-3.64889
chr11	125442881	125592568	-	ENSG00000149557.14	protein_coding	FEZ1	9638	fasciculation and elongation protein zeta 1	UNC-76	9324	1.93633	-0.776227	2.78409	0.0103732	0.414262	-2.65975
chr14	50108632	50116600	-	ENSG00000100483.14	protein_coding	VCPKMT	79609	valosin containing protein lysine methyltransferase	C14orf138|METTL21D|VCP-KMT	2055	-0.439007	5.02683	-2.78313	0.0103961	0.414262	-3.5247
chr9	4553386	4666674	-	ENSG00000106686.16	protein_coding	SPATA6L	55064	spermatogenesis associated 6 like	C9orf68|bA6J24.2	7361	-0.938745	2.12782	-2.77566	0.0105771	0.420058	-2.86694
chr6	87590067	87667453	+	ENSG00000135336.15	protein_coding	ORC3	23595	origin recognition complex subunit 3	LAT|LATHEO|ORC3L	3689	-0.336235	5.20357	-2.77334	0.0106339	0.420897	-3.57965
chr12	103770453	103841234	-	ENSG00000111696.12	protein_coding	NT5DC3	51559	5'-nucleotidase domain containing 3	TU12B1-TY|TU12B1TY	8759	-0.640158	4.10563	-2.77824	0.0107329	0.423394	-3.35974
chr8	94895767	95116455	+	ENSG00000156170.13	protein_coding	NDUFAF6	137682	NADH:ubiquinone oxidoreductase complex assembly factor 6	C8orf38|FRTS5|MC1DN17	6403	-0.423986	4.46167	-2.76539	0.0108306	0.424943	-3.44598
chr11	63573195	63616883	-	ENSG00000176485.11	protein_coding	PLAAT3	11145	phospholipase A and acyltransferase 3	AdPLA|H-REV107|H-REV107-1|HRASLS3|HREV107|HREV107-1|HREV107-3|HRSL3|PLA2G16|PLAAT-3	3116	2.24261	-0.194895	2.76485	0.0108443	0.424943	-2.68511
chr10	13643706	14462142	-	ENSG00000151474.23	protein_coding	FRMD4A	55691	FERM domain containing 4A	CCAFCA|FRMD4|bA295P9.4	14686	0.58815	3.37925	2.76225	0.0109092	0.426074	-3.23806
chr6	63572472	63583587	+	ENSG00000285976.2	protein_coding	AL135905.2	NA	NA	NA	4726	-1.00272	3.05385	-2.79203	0.0110038	0.42777	-3.10024
chr4	168497052	168928457	+	ENSG00000129116.19	protein_coding	PALLD	23022	palladin, cytoskeletal associated protein	CGI-151|CGI151|MYN|PNCA1|SIH002	10128	1.4092	1.11563	2.76067	0.0110252	0.42777	-2.77658
chr19	3976056	3985463	-	ENSG00000167658.16	protein_coding	EEF2	1938	eukaryotic translation elongation factor 2	EEF-2|EF-2|EF2|SCA26	4021	0.257542	11.7238	2.7555	0.0110803	0.428499	-3.95439
chr15	90954870	90963125	+	ENSG00000166965.12	protein_coding	RCCD1	91433	RCC1 domain containing 1	-	4969	0.538706	4.08338	2.7521	0.0111674	0.430455	-3.38708
chr20	4780023	4823608	-	ENSG00000101265.16	protein_coding	RASSF2	9770	Ras association domain family member 2	CENP-34|RASFADIN	5722	0.463713	6.64239	2.7879	0.0112755	0.432432	-3.83462
chr11	123057489	123063230	-	ENSG00000109971.14	protein_coding	HSPA8	3312	heat shock protein family A (Hsp70) member 8	HEL-33|HEL-S-72p|HSC54|HSC70|HSC71|HSP71|HSP73|HSPA10|LAP-1|LAP1|NIP71	4849	0.393608	9.7858	2.77413	0.011292	0.432432	-3.94191
chr2	201377207	201451500	-	ENSG00000115993.13	protein_coding	TRAK2	66008	trafficking kinesin protein 2	ALS2CR3|CALS-C|GRIF-1|GRIF1|MILT2|OIP98	7516	-0.418022	6.88049	-2.76741	0.01135	0.432786	-3.86942
chr20	45833799	45843276	+	ENSG00000124104.19	protein_coding	SNX21	90203	sorting nexin family member 21	C20orf161|PP3993|SNX-L|dJ337O18.4	4078	-0.648092	2.27286	-2.7436	0.0113879	0.432786	-2.95251
chr8	21908873	21913690	-	ENSG00000147443.13	protein_coding	DOK2	9046	docking protein 2	p56DOK|p56dok-2	2041	0.432251	6.29604	2.76212	0.0114288	0.432786	-3.83438
chr15	100602589	100651701	+	ENSG00000183475.13	protein_coding	ASB7	140460	ankyrin repeat and SOCS box containing 7	-	5338	-0.292633	5.86605	-2.74131	0.011448	0.432786	-3.78776
chr17	56791913	56838773	-	ENSG00000214226.9	protein_coding	C17orf67	339210	chromosome 17 open reading frame 67	-	2434	0.45405	3.85112	2.73966	0.0114915	0.433042	-3.39335
chr1	85265776	85276632	-	ENSG00000142867.14	protein_coding	BCL10	8915	BCL10 immune signaling adaptor	CARMEN|CIPER|CLAP|IMD37|c-E10|mE10	4346	-0.752108	4.55194	-2.77966	0.0115699	0.434607	-3.41921
chr20	43590937	43647299	+	ENSG00000101052.13	protein_coding	IFT52	51098	intraflagellar transport 52	C20orf9|CGI-53|NGD2|NGD5	2539	-0.316392	4.31273	-2.73336	0.0116591	0.436567	-3.51044
chr1	20186096	20196050	+	ENSG00000162543.6	protein_coding	UBXN10	127733	UBX domain protein 10	UBXD3	5562	1.72375	-0.551826	2.72969	0.0117575	0.43886	-2.74032
chr9	3824127	4348392	-	ENSG00000107249.23	protein_coding	GLIS3	169792	GLIS family zinc finger 3	NDH|ZNF515	11978	-2.32611	-1.54261	-2.72637	0.0118474	0.440822	-2.82374
chr16	11547722	11636381	-	ENSG00000189067.13	protein_coding	LITAF	9516	lipopolysaccharide induced TNF factor	PIG7|SIMPLE|TP53I7	5058	0.277028	7.64055	2.72305	0.0119381	0.44239	-3.98107
chr4	1056250	1113564	-	ENSG00000178222.13	protein_coding	RNF212	285498	ring finger protein 212	ZHP3	5005	0.923463	2.60532	2.72899	0.0120003	0.44239	-3.13859
chr3	184314495	184335358	+	ENSG00000114867.22	protein_coding	EIF4G1	1981	eukaryotic translation initiation factor 4 gamma 1	EIF-4G1|EIF4F|EIF4G|EIF4GI|P220|PARK18	8752	0.218769	7.89304	2.72018	0.0120167	0.44239	-3.99588
chr16	75536741	75556268	-	ENSG00000205084.11	protein_coding	TMEM231	79583	transmembrane protein 231	ALYE870|JBTS20|MKS11|PRO1886	6000	-1.13711	0.700458	-2.71782	0.0120819	0.44239	-2.8
chr17	80206716	80220923	-	ENSG00000181523.13	protein_coding	SGSH	6448	N-sulfoglucosamine sulfohydrolase	HSS|MPS3A|SFMD	6661	-0.28933	7.22004	-2.71512	0.012157	0.44239	-3.97795
chr8	78666089	78719765	+	ENSG00000104427.12	protein_coding	ZC2HC1A	51101	zinc finger C2HC-type containing 1A	C8orf70|CGI-62|FAM164A	4139	-1.22166	0.993414	-2.7124	0.0122329	0.44239	-2.83166
chr15	89087459	89202355	+	ENSG00000140526.18	protein_coding	ABHD2	11057	abhydrolase domain containing 2, acylglycerol lipase	HS1-2|LABH2|PHPS1-2	10068	0.412914	5.73871	2.71653	0.0122444	0.44239	-3.84062
chr6	159969082	160113507	+	ENSG00000197081.15	protein_coding	IGF2R	3482	insulin like growth factor 2 receptor	CD222|CI-M6PR|CIMPR|M6P-R|M6P/IGF2R|MPR 300|MPR1|MPR300|MPRI	17860	0.321198	7.8303	2.71153	0.0122573	0.44239	-4.01393
chr1	43991359	43996528	+	ENSG00000159214.13	protein_coding	CCDC24	149473	coiled-coil domain containing 24	-	3563	-1.53227	-0.418666	-2.71076	0.0122789	0.44239	-2.76796
chr5	157395534	157575775	-	ENSG00000135074.16	protein_coding	ADAM19	8728	ADAM metallopeptidase domain 19	FKSG34|MADDAM|MLTNB	7704	-1.53446	2.80596	-2.81317	0.012321	0.44239	-3.11064
chr6	26224199	26227473	+	ENSG00000274750.2	protein_coding	H3C6	8353	H3 clustered histone 6	H3.1|H3/d|H3C1|H3C10|H3C11|H3C12|H3C2|H3C3|H3C4|H3C7|H3C8|H3FD|HIST1H3E	2679	2.02872	-0.567135	2.70774	0.012364	0.44239	-2.80153
chr10	124984317	125161170	-	ENSG00000175029.17	protein_coding	CTBP2	1488	C-terminal binding protein 2	-	11056	1.39041	0.42825	2.70664	0.0123952	0.44239	-2.8007
chr1	25861484	25875708	-	ENSG00000182749.6	protein_coding	PAQR7	164091	progestin and adipoQ receptor family member 7	MPRA|PGLP|mSR	3244	-0.719223	1.91706	-2.70548	0.0124282	0.44239	-3.01803
chr22	36487190	36507101	-	ENSG00000100350.14	protein_coding	FOXRED2	80020	FAD dependent oxidoreductase domain containing 2	ERFAD	5577	0.688186	2.65656	2.70464	0.0124522	0.44239	-3.21296
chr14	73237497	73274640	+	ENSG00000100767.17	protein_coding	PAPLN	89932	papilin, proteoglycan like sulfated glycoprotein	PPN	7699	-1.18174	1.77313	-2.70209	0.012525	0.44239	-2.91884
chr11	68891276	68903835	-	ENSG00000197345.13	protein_coding	MRPL21	219927	mitochondrial ribosomal protein L21	L21mt|MRP-L21	2825	-0.497756	4.02379	-2.70135	0.0125462	0.44239	-3.44942
chr1	232983435	233295725	-	ENSG00000135749.19	protein_coding	PCNX2	80003	pecanex 2	PCNXL2	13827	-0.281543	6.56344	-2.70015	0.0125806	0.44239	-3.96641
chr9	35696948	35732195	-	ENSG00000137076.21	protein_coding	TLN1	7094	talin 1	ILWEQ|TLN|talin-1	9876	0.231943	8.91467	2.69833	0.012633	0.44239	-4.06317
chr17	49210411	49223225	+	ENSG00000108798.9	protein_coding	ABI3	51225	ABI family member 3	NESH|SSH3BP3	2272	0.645795	3.2364	2.69606	0.0126987	0.44239	-3.35284
chr3	179562886	179588407	+	ENSG00000136518.17	protein_coding	ACTL6A	86	actin like 6A	ACTL6|ARPN-BETA|Arp4|BAF53A|INO80K	3668	0.262105	5.73729	2.69529	0.0127211	0.44239	-3.8642
chr6	27138588	27139881	+	ENSG00000276180.1	protein_coding	H4C9	8294	H4 clustered histone 9	H4-16|H4/m|H4C1|H4C11|H4C12|H4C13|H4C14|H4C15|H4C2|H4C3|H4C4|H4C5|H4C6|H4C8|H4FM|H4M|HIST1H4I	1294	1.21578	1.74214	2.6943	0.0127499	0.44239	-2.93115
chr3	25174332	25597932	+	ENSG00000077092.19	protein_coding	RARB	5915	retinoic acid receptor beta	HAP|MCOPS12|NR1B2|RARbeta1|RRB2	3697	1.34376	0.282528	2.69427	0.0127507	0.44239	-2.79683
chr11	45804072	45813016	+	ENSG00000181830.9	protein_coding	SLC35C1	55343	solute carrier family 35 member C1	CDG2C|FUCT1	3875	0.497786	4.24245	2.69422	0.0127522	0.44239	-3.58507
chr1	18904280	18956676	-	ENSG00000169991.11	protein_coding	IFFO2	126917	intermediate filament family orphan 2	-	6179	0.379383	6.02497	2.68952	0.0128898	0.444564	-3.92126
chr17	44034328	44067619	-	ENSG00000161654.10	protein_coding	LSM12	124801	LSM12 homolog	PNAS-135	3116	-0.682543	2.27672	-2.68934	0.012895	0.444564	-3.09771
chr3	111070071	111275563	+	ENSG00000177707.11	protein_coding	NECTIN3	25945	nectin cell adhesion molecule 3	CD113|CDW113|NECTIN-3|PPR3|PRR3|PVRL3|PVRR3	7717	-1.65477	0.0694796	-2.68735	0.0129538	0.444564	-2.80919
chr12	55720367	55724705	+	ENSG00000135437.10	protein_coding	RDH5	5959	retinol dehydrogenase 5	9cRDH|HSD17B9|RDH1|SDR9C5	2983	0.542093	2.57629	2.68613	0.01299	0.444564	-3.18635
chr2	109792758	109857705	+	ENSG00000015568.13	protein_coding	RGPD5	84220	RANBP2 like and GRIP domain containing 5	BS-63|BS63|HEL161|RGP5	14185	-0.940428	1.71276	-2.68568	0.0130034	0.444564	-2.9388
chr3	14135217	14148252	+	ENSG00000268279.4	protein_coding	AC090004.1	NA	NA	NA	1335	0.728202	1.60484	2.68057	0.0131555	0.448467	-2.97872
chr10	49818279	49970203	-	ENSG00000227345.8	protein_coding	PARG	8505	poly(ADP-ribose) glycohydrolase	PARG99	5129	0.390789	4.30861	2.67887	0.0132067	0.448913	-3.60131
chr6	56457987	56954649	-	ENSG00000151914.20	protein_coding	DST	667	dystonin	BP240|BPA|BPAG1|CATX-15|CATX15|D6S1101|DMH|DT|EBSB2|HSAN6|MACF2	47883	-0.651197	3.50361	-2.66848	0.0135231	0.458148	-3.42078
chr11	96352769	96389956	-	ENSG00000149231.15	protein_coding	CCDC82	79780	coiled-coil domain containing 82	HSPC048	17313	0.50641	7.30841	2.73073	0.0135864	0.458148	-4.02323
chr12	52006946	52015889	+	ENSG00000161835.11	protein_coding	TAMALIN	160622	trafficking regulator and scaffold protein tamalin	GRASP	2823	-0.883918	3.71077	-2.70707	0.0136394	0.458148	-3.42368
chr11	33039417	33105943	+	ENSG00000176148.16	protein_coding	TCP11L1	55346	t-complex 11 like 1	dJ85M6.3	5370	0.514152	3.53104	2.66376	0.0136691	0.458148	-3.4395
chr4	112539333	112636995	-	ENSG00000138658.15	protein_coding	ZGRF1	55345	zinc finger GRF-type containing 1	C4orf21	9103	0.437818	5.21229	2.66454	0.0136726	0.458148	-3.84082
chr21	41798225	41879482	-	ENSG00000141956.14	protein_coding	PRDM15	63977	PR/SET domain 15	C21orf83|PFM15|ZNF298	12998	-0.321245	5.61495	-2.65991	0.0137893	0.460751	-3.9367
chr8	66429014	66430733	+	ENSG00000179041.4	protein_coding	RRS1	23212	ribosome biogenesis regulator 1 homolog	-	1720	-0.465452	4.75367	-2.65671	0.01389	0.462804	-3.75381
chr4	88695913	88697829	-	ENSG00000177432.8	protein_coding	NAP1L5	266812	nucleosome assembly protein 1 like 5	DRLM	1917	-1.06222	2.85899	-2.67525	0.0139863	0.46435	-3.21631
chr6	149218641	149411613	+	ENSG00000055208.19	protein_coding	TAB2	23118	TGF-beta activated kinase 1 (MAP3K7) binding protein 2	CHTD2|MAP3K7IP2|TAB-2	5922	-0.263228	8.25808	-2.65276	0.0140151	0.46435	-4.14603
chr9	136206333	136245812	-	ENSG00000165661.17	protein_coding	QSOX2	169714	quiescin sulfhydryl oxidase 2	QSCN6L1|SOXN	4501	-0.33437	6.0305	-2.65135	0.01406	0.46453	-4.01316
chr19	40393766	40414793	-	ENSG00000105227.16	protein_coding	PRX	57716	periaxin	CMT4F	7402	0.506974	3.42974	2.64567	0.0142426	0.469249	-3.47271
chr14	64704102	64750249	+	ENSG00000126822.17	protein_coding	PLEKHG3	26030	pleckstrin homology and RhoGEF domain containing G3	ARHGEF43|KIAA0599	11924	3.38679	0.288915	2.76382	0.0142847	0.469326	-2.86476
chr4	6716174	6717664	+	ENSG00000186222.5	protein_coding	BLOC1S4	55330	biogenesis of lysosomal organelles complex 1 subunit 4	BCAS4L|BLOS4|CNO	1491	-0.366814	4.96276	-2.6399	0.0144301	0.472616	-3.83293
chr12	8950044	9010760	+	ENSG00000139187.10	protein_coding	KLRG1	10219	killer cell lectin like receptor G1	2F1|CLEC15A|MAFA|MAFA-2F1|MAFA-L|MAFA-LIKE	2593	0.966663	3.13423	2.67271	0.0145317	0.472616	-3.37143
chr8	93857807	93926068	+	ENSG00000164951.16	protein_coding	PDP1	54704	pyruvate dehyrogenase phosphatase catalytic subunit 1	PDH|PDP|PDPC|PPM2A|PPM2C	5604	-0.458986	5.33168	-2.64035	0.0145497	0.472616	-3.87413
chr10	11453946	11611754	-	ENSG00000148429.14	protein_coding	USP6NL	9712	USP6 N-terminal like	RNTRE|TRE2NL|USP6NL-IT1	14202	-0.524753	4.35554	-2.63542	0.0145773	0.472616	-3.67413
chr7	5306790	5425414	-	ENSG00000182095.14	protein_coding	TNRC18	84629	trinucleotide repeat containing 18	CAGL79|TNRC18A	12572	0.215647	6.93217	2.63492	0.0145938	0.472616	-4.12817
chr17	17977409	18039209	-	ENSG00000171953.16	protein_coding	ATPAF2	91647	ATP synthase mitochondrial F1 complex assembly factor 2	ATP12|ATP12p|LP3663|MC5DN1	5553	-0.365708	4.24434	-2.63306	0.0146555	0.472616	-3.70549
chr5	154190730	154420984	+	ENSG00000164574.16	protein_coding	GALNT10	55568	polypeptide N-acetylgalactosaminyltransferase 10	GALNACT10|PPGALNACT10|PPGANTASE10	10496	0.345013	5.71649	2.63277	0.0146653	0.472616	-4.00654
chrX	71578411	71613583	+	ENSG00000147174.11	protein_coding	GCNA	93953	germ cell nuclear acidic peptidase	ACRC|NAAR1	3621	-0.475552	4.08599	-2.62823	0.0148168	0.472805	-3.66066
chr10	103367976	103389065	+	ENSG00000148835.11	protein_coding	TAF5	6877	TATA-box binding protein associated factor 5	TAF(II)100|TAF2D|TAFII-100|TAFII100	3259	0.563322	3.76405	2.62801	0.0148241	0.472805	-3.55198
chr19	49506816	49526428	+	ENSG00000104870.13	protein_coding	FCGRT	2217	Fc fragment of IgG receptor and transporter	FCRN|alpha-chain	4052	0.363236	6.16562	2.62747	0.014842	0.472805	-4.07748
chr11	111352255	111455630	-	ENSG00000110777.12	protein_coding	POU2AF1	5450	POU class 2 homeobox associating factor 1	BOB1|OBF-1|OBF1|OCAB	6996	-0.954232	1.58054	-2.62729	0.0148484	0.472805	-3.12932
chr1	39026318	39034636	+	ENSG00000168653.11	protein_coding	NDUFS5	4725	NADH:ubiquinone oxidoreductase subunit S5	CI-15k|CI15K	548	-0.265354	5.67783	-2.62603	0.0148905	0.472805	-4.00686
chrX	149476988	149521096	-	ENSG00000010404.18	protein_coding	IDS	3423	iduronate 2-sulfatase	ID2S|MPS2|SIDS	9294	0.383103	4.5876	2.62534	0.014914	0.472805	-3.78249
chr7	6497462	6551436	-	ENSG00000215045.8	protein_coding	GRID2IP	392862	Grid2 interacting protein	DELPHILIN	4134	1.21293	1.43537	2.62422	0.0149518	0.472805	-3.0098
chr8	104489231	104589024	-	ENSG00000147650.11	protein_coding	LRP12	29967	LDL receptor related protein 12	MIG13A|ST7	9777	0.963476	1.26098	2.62163	0.0150396	0.473949	-3.05778
chr22	37848868	37889407	+	ENSG00000100129.18	protein_coding	EIF3L	51386	eukaryotic translation initiation factor 3 subunit L	EIF3EIP|EIF3S11|EIF3S6IP|HSPC021|HSPC025|MSTP005	4296	0.285089	8.38638	2.62078	0.0150683	0.473949	-4.21877
chr18	26226445	26391685	+	ENSG00000141384.13	protein_coding	TAF4B	6875	TATA-box binding protein associated factor 4b	SPGF13|TAF2C2|TAFII105	4886	-0.38158	5.085	-2.61472	0.0152762	0.47739	-3.89848
chr16	68229033	68238102	-	ENSG00000103067.14	protein_coding	ESRP2	80004	epithelial splicing regulatory protein 2	RBM35B	5189	1.11047	1.32734	2.61443	0.0152863	0.47739	-3.03573
chr7	98877933	99050831	+	ENSG00000196367.14	protein_coding	TRRAP	8295	transformation/transcription domain associated protein	DEDDFA|DFNA75|PAF350/400|PAF400|STAF40|TR-AP|Tra1	19972	0.222365	8.07142	2.61226	0.0153612	0.47739	-4.23041
chr7	102573807	102616756	-	ENSG00000105808.18	protein_coding	RASA4	10156	RAS p21 protein activator 4	CAPRI|GAPL	8076	0.709199	2.32972	2.61184	0.0153758	0.47739	-3.23646
chr19	10333776	10339661	-	ENSG00000076662.10	protein_coding	ICAM3	3385	intercellular adhesion molecule 3	CD50|CDW50|ICAM-R	2788	0.243467	6.10515	2.61172	0.0153801	0.47739	-4.10116
chr11	108505435	108593768	-	ENSG00000110723.12	protein_coding	EXPH5	23086	exophilin 5	SLAC2-B|SLAC2B	10944	-0.660064	3.26656	-2.60747	0.0155284	0.479606	-3.48909
chr2	74421678	74425755	+	ENSG00000005448.17	protein_coding	WDR54	84058	WD repeat domain 54	-	2852	0.431515	4.23263	2.6064	0.0155657	0.479606	-3.73542
chr15	99971437	100342005	-	ENSG00000140470.14	protein_coding	ADAMTS17	170691	ADAM metallopeptidase with thrombospondin type 1 motif 17	WMS4	8394	-0.525085	3.45773	-2.60618	0.0155735	0.479606	-3.55546
chr9	35490111	35561898	+	ENSG00000198853.12	protein_coding	RUSC2	9853	RUN and SH3 domain containing 2	Iporin|MRT61	5698	1.21511	1.04366	2.60411	0.0156465	0.480601	-3.02314
chr9	21329665	21335404	-	ENSG00000198642.7	protein_coding	KLHL9	55958	kelch like family member 9	-	5740	0.338711	5.96346	2.60257	0.015701	0.481021	-4.09117
chr19	48661407	48673081	-	ENSG00000142233.13	protein_coding	NTN5	126147	netrin 5	-	3115	-0.659905	2.72072	-2.60113	0.0157519	0.481332	-3.35358
chr19	58326994	58342332	+	ENSG00000182318.6	protein_coding	ZSCAN22	342945	zinc finger and SCAN domain containing 22	HKR2|ZNF50	4654	0.962361	2.10162	2.59033	0.0161401	0.489763	-3.28993
chr5	95713522	95824383	+	ENSG00000164292.13	protein_coding	RHOBTB3	22836	Rho related BTB domain containing 3	-	8827	0.549937	3.27417	2.5882	0.0162174	0.489763	-3.53593
chr10	87859158	87863437	-	ENSG00000227268.4	protein_coding	KLLN	100144748	killin, p53 regulated DNA replication inhibitor	CWS4|KILLIN	4280	1.61747	-0.368529	2.58652	0.0162791	0.489763	-2.98534
chr19	18572220	18607741	-	ENSG00000006016.11	protein_coding	CRLF1	9244	cytokine receptor like factor 1	CISS|CISS1|CLF|CLF-1|NR6|zcytor5	2967	-1.34649	-0.187512	-2.58518	0.0163281	0.489763	-2.98841
chr19	46486906	46495879	-	ENSG00000204851.7	protein_coding	PNMA8B	57469	PNMA family member 8B	PNMAL2	4887	1.64026	0.735015	2.59998	0.0163607	0.489763	-3.06048
chr14	58200080	58235636	+	ENSG00000131966.14	protein_coding	ACTR10	55860	actin related protein 10	ACTR11|Arp10|Arp11|HARP11	4039	0.285089	5.48556	2.58274	0.0164178	0.489763	-4.0632
chr19	44662278	44684359	+	ENSG00000186567.13	protein_coding	CEACAM19	56971	CEA cell adhesion molecule 19	CEACM19|CEAL1	5203	-1.32057	0.641784	-2.58169	0.0164566	0.489763	-3.03025
chr1	19303965	19312146	-	ENSG00000053371.12	protein_coding	AKR7A2	8574	aldo-keto reductase family 7 member A2	AFAR|AFAR1|AFB1-AR1|AKR7	1781	0.31335	4.48766	2.58163	0.0164591	0.489763	-3.86444
chr10	49154725	49188585	-	ENSG00000204161.14	protein_coding	TMEM273	170371	transmembrane protein 273	C10orf128	4123	3.52767	-0.587772	2.65489	0.0164842	0.489763	-2.96212
chr1	23380909	23424748	-	ENSG00000204219.11	protein_coding	TCEA3	6920	transcription elongation factor A3	TFIIS|TFIIS.H	3675	-0.274592	5.52668	-2.58081	0.0164892	0.489763	-4.07779
chr17	30831966	30895869	+	ENSG00000176208.9	protein_coding	ATAD5	79915	ATPase family AAA domain containing 5	C17orf41|ELG1|FRAG1	7079	0.332523	4.26996	2.57858	0.0165723	0.489763	-3.79084
chr1	26234200	26278808	+	ENSG00000130695.15	protein_coding	CEP85	64793	centrosomal protein 85	CCDC21	5145	0.327623	5.40198	2.57805	0.016592	0.489763	-4.0675
chr7	88205115	88226993	-	ENSG00000075142.14	protein_coding	SRI	6717	sorcin	CP-22|CP22|SCN|V19	4226	-0.367129	5.22855	-2.57788	0.0165982	0.489763	-4.01892
chr16	66603874	66613892	+	ENSG00000140931.20	protein_coding	CMTM3	123920	CKLF like MARVEL transmembrane domain containing 3	BNAS2|CKLFSF3	3123	-0.249028	6.3408	-2.57759	0.0166092	0.489763	-4.19612
chr10	103245887	103248016	+	ENSG00000235376.5	protein_coding	RPEL1	729020	ribulose-5-phosphate-3-epimerase like 1	-	2130	1.58193	0.194675	2.57399	0.0167438	0.490593	-3.0066
chr13	97434169	97469128	+	ENSG00000125249.7	protein_coding	RAP2A	5911	RAP2A, member of RAS oncogene family	K-REV|KREV|RAP2|RbBP-30	5623	0.486372	4.30521	2.57399	0.0167441	0.490593	-3.84864
chr19	43525497	43536130	+	ENSG00000176472.10	protein_coding	ZNF575	284346	zinc finger protein 575	-	3222	-0.511301	2.99909	-2.57327	0.016771	0.490593	-3.54225
chr5	42756818	42802439	+	ENSG00000198865.10	protein_coding	CCDC152	100129792	coiled-coil domain containing 152	CH5400	3493	0.796206	2.13484	2.5724	0.0168037	0.490593	-3.27038
chr2	180967248	181076585	+	ENSG00000170035.16	protein_coding	UBE2E3	10477	ubiquitin conjugating enzyme E2 E3	UBCH9|UbcM2	2974	0.336805	4.21894	2.57073	0.016867	0.490886	-3.80446
chr19	49665142	49673916	+	ENSG00000126453.9	protein_coding	BCL2L12	83596	BCL2 like 12	-	2216	-0.423517	3.47769	-2.56994	0.016897	0.490886	-3.67106
chr2	190504338	190534722	-	ENSG00000189362.12	protein_coding	NEMP2	100131211	nuclear envelope integral membrane protein 2	TMEM194B	6525	0.315278	5.41202	2.5678	0.0169782	0.492034	-4.07036
chr16	1333638	1349441	+	ENSG00000007516.14	protein_coding	BAIAP3	8938	BAI1 associated protein 3	BAP3	6109	-1.78176	0.129635	-2.57009	0.0170875	0.493987	-3.04387
chr1	21822244	21937310	-	ENSG00000142798.20	protein_coding	HSPG2	3339	heparan sulfate proteoglycan 2	HSPG|PLC|PRCAN|SJA|SJS|SJS1	18118	0.427576	5.055	2.56507	0.0172171	0.4948	-4.06295
chr12	6828407	6839847	+	ENSG00000110811.20	protein_coding	P3H3	10536	prolyl 3-hydroxylase 3	GRCB|HSU47926|LEPREL2	4600	-0.827698	1.69789	-2.55944	0.0172994	0.4948	-3.22583
chr19	8520778	8577577	-	ENSG00000142347.19	protein_coding	MYO1F	4542	myosin IF	-	8561	1.44924	3.94879	2.68176	0.017358	0.4948	-3.73619
chr1	157121191	157138474	-	ENSG00000117036.12	protein_coding	ETV3	2117	ETS variant transcription factor 3	METS|PE-1|PE1	6707	-0.352077	5.13111	-2.55753	0.0173736	0.4948	-4.06711
chr4	103077592	103099870	-	ENSG00000164039.15	protein_coding	BDH2	56898	3-hydroxybutyrate dehydrogenase 2	DHRS6|EFA6R|PRO20933|SDR15C1|UCPA-OR|UNQ6308	5213	0.419311	5.01923	2.5562	0.0174253	0.4948	-4.01595
chr11	78215293	78418348	-	ENSG00000033327.13	protein_coding	GAB2	9846	GRB2 associated binding protein 2	-	6775	-0.758139	2.96309	-2.55413	0.0175062	0.4948	-3.53783
chr19	7348943	7383385	+	ENSG00000263264.2	protein_coding	AC119396.1	NA	NA	NA	1646	0.349412	6.18437	2.55385	0.0175173	0.4948	-4.22801
chr17	14235673	14236862	-	ENSG00000223510.7	protein_coding	CDRT15	146822	CMT1A duplicated region transcript 15	-	779	1.25643	0.535329	2.55337	0.0175364	0.4948	-3.09148
chr1	155033824	155050930	+	ENSG00000163357.11	protein_coding	DCST1	149095	DC-STAMP domain containing 1	-	3193	-1.37438	-0.178282	-2.55285	0.0175565	0.4948	-3.04492
chr2	70257386	70281185	+	ENSG00000116005.12	protein_coding	PCYOX1	51449	prenylcysteine oxidase 1	PCL1	5864	0.419384	5.38705	2.5558	0.0175657	0.4948	-4.09491
chr16	69762306	69941741	+	ENSG00000198373.12	protein_coding	WWP2	11060	WW domain containing E3 ubiquitin protein ligase 2	AIP2|WWp2-like	9015	0.236155	6.29249	2.55233	0.017577	0.4948	-4.25279
chr14	64945814	64973226	-	ENSG00000139998.16	protein_coding	RAB15	376267	RAB15, member RAS oncogene family	-	4937	0.309845	5.19325	2.55096	0.0176312	0.495143	-4.09438
chr4	98261384	98443858	+	ENSG00000138698.15	protein_coding	RAP1GDS1	5910	Rap1 GTPase-GDP dissociation stimulator 1	GDS1|SmgGDS	5421	-0.294076	5.24784	-2.54935	0.0176948	0.495318	-4.07941
chr5	80626226	80654983	-	ENSG00000228716.7	protein_coding	DHFR	1719	dihydrofolate reductase	DHFRP1|DYR	4411	0.442882	4.22806	2.54845	0.0177304	0.495318	-3.86474
chr16	22206278	22288738	+	ENSG00000103319.12	protein_coding	EEF2K	29904	eukaryotic elongation factor 2 kinase	CaMKIII|HSU93850|eEF-2K	8030	-0.425512	4.98076	-2.54762	0.0177634	0.495318	-4.03934
chr20	24962925	24992751	-	ENSG00000101474.12	protein_coding	APMAP	57136	adipocyte plasma membrane associated protein	BSCv|C20orf3	2226	0.362576	5.73953	2.54366	0.0179214	0.497278	-4.20304
chr12	56041351	56044697	+	ENSG00000197728.11	protein_coding	RPS26	6231	ribosomal protein S26	DBA10|S26|eS26	2053	0.498202	4.88644	2.55047	0.0179349	0.497278	-3.98624
chr17	82078338	82098294	-	ENSG00000169710.9	protein_coding	FASN	2194	fatty acid synthase	FAS|OA-519|SDR27X1	9321	0.347472	6.56945	2.54192	0.0181317	0.497278	-4.30091
chr6	159762045	159779112	+	ENSG00000120437.9	protein_coding	ACAT2	39	acetyl-CoA acetyltransferase 2	-	2639	-0.404306	4.31638	-2.53739	0.0181741	0.497278	-3.93948
chr5	159157409	159210053	-	ENSG00000145860.12	protein_coding	RNF145	153830	ring finger protein 145	-	4614	-0.229777	6.89583	-2.53722	0.018181	0.497278	-4.32829
chr8	80034745	80231232	-	ENSG00000076554.15	protein_coding	TPD52	7163	tumor protein D52	D52|N8L|PC-1|PrLZ|hD52	8197	-0.529949	4.07379	-2.53697	0.018191	0.497278	-3.79177
chr22	24417879	24442357	+	ENSG00000128271.22	protein_coding	ADORA2A	135	adenosine A2a receptor	A2aR|ADORA2|RDC8	4190	0.832535	2.18542	2.53512	0.0182663	0.497278	-3.36763
chr17	58000919	58007346	-	ENSG00000136450.13	protein_coding	SRSF1	6426	serine and arginine rich splicing factor 1	ASF|SF2|SF2p33|SFRS1|SRp30a	5781	0.257839	6.53061	2.5347	0.0182835	0.497278	-4.29406
chr8	144393229	144409335	-	ENSG00000071894.17	protein_coding	CPSF1	29894	cleavage and polyadenylation specific factor 1	CPSF160|HSU37012|MYP27|P/cl.18	6058	-0.252346	8.19859	-2.53466	0.0182851	0.497278	-4.39725
chr7	98106862	98209638	+	ENSG00000164715.6	protein_coding	LMTK2	22853	lemur tyrosine kinase 2	AATYK2|BREK|KPI-2|KPI2|LMR2|PPP1R100|cprk|hBREK	9167	-0.305341	6.73181	-2.53465	0.0182855	0.497278	-4.31257
chr18	49822789	50195147	-	ENSG00000167306.20	protein_coding	MYO5B	4645	myosin VB	-	10566	1.5446	0.262527	2.53436	0.0182975	0.497278	-3.08219
chr2	85341955	85354531	-	ENSG00000042445.14	protein_coding	RETSAT	54884	retinol saturase	-	4049	0.388899	5.18302	2.53279	0.0183615	0.497871	-4.12544
chrX	24149173	24216255	+	ENSG00000005889.15	protein_coding	ZFX	7543	zinc finger protein X-linked	ZNF926	9037	-0.415818	6.79451	-2.55992	0.0184622	0.498187	-4.30828
chr6	43037617	43053945	-	ENSG00000044090.10	protein_coding	CUL7	9820	cullin 7	3M1|CUL-7|KIAA0076|dJ20C7.5	6101	-0.268566	5.2021	-2.52954	0.0184951	0.498187	-4.12316
chr1	87328880	87348923	+	ENSG00000143013.13	protein_coding	LMO4	8543	LIM domain only 4	-	5421	0.456888	3.54781	2.52852	0.0185374	0.498187	-3.73628
chr17	18225635	18244875	+	ENSG00000131899.11	protein_coding	LLGL1	3996	LLGL scribble cell polarity complex component 1	DLG4|HUGL|HUGL-1|HUGL1|LLGL|Lgl1|Mgl1	6590	0.241567	5.74049	2.52838	0.0185431	0.498187	-4.2245
chr21	46598604	46605208	-	ENSG00000160307.10	protein_coding	S100B	6285	S100 calcium binding protein B	NEF|S100|S100-B|S100beta	1806	-1.48798	1.25039	-2.54219	0.0185843	0.498187	-3.20444
chr15	79833585	79897379	-	ENSG00000136371.11	protein_coding	MTHFS	10588	methenyltetrahydrofolate synthetase	HsT19268|NEDMEHM	3027	-0.59063	2.7279	-2.52304	0.0187653	0.50099	-3.56858
chr7	44114681	44124358	-	ENSG00000106628.10	protein_coding	POLD2	5425	DNA polymerase delta 2, accessory subunit	-	3695	0.258443	5.70666	2.52161	0.0188253	0.50099	-4.23102
chr5	218298	314955	+	ENSG00000286001.1	protein_coding	AC021087.5	NA	NA	NA	3665	2.3534	-0.76865	2.52082	0.0189546	0.50099	-3.108
chr22	40951347	40973309	+	ENSG00000100387.9	protein_coding	RBX1	9978	ring-box 1	BA554C12.1|RNF75|ROC1	3092	-0.308956	5.01036	-2.51779	0.018986	0.50099	-4.11529
chr8	125091679	125367120	+	ENSG00000156831.8	protein_coding	NSMCE2	286053	NSE2 (MMS21) homolog, SMC5-SMC6 complex SUMO ligase	C8orf36|MMS21|NSE2|ZMIZ7	2991	0.360394	3.59897	2.51434	0.0191322	0.50099	-3.74804
chr9	91213815	91361918	-	ENSG00000148090.12	protein_coding	AUH	549	AU RNA binding methylglutaconyl-CoA hydratase	-	2263	0.34356	4.32871	2.51301	0.019189	0.50099	-3.94301
chr6	41934934	42050357	-	ENSG00000112576.13	protein_coding	CCND3	896	cyclin D3	-	5761	-0.298192	8.54945	-2.51289	0.0191941	0.50099	-4.44732
chr6	26440472	26453415	+	ENSG00000111801.16	protein_coding	BTN3A3	10384	butyrophilin subfamily 3 member A3	BTF3|BTN3.3	5658	0.271572	8.18303	2.51275	0.0192002	0.50099	-4.43953
chr14	55271421	55361918	+	ENSG00000178974.10	protein_coding	FBXO34	55030	F-box protein 34	CGI-301|Fbx34	4017	-0.291831	5.16223	-2.51259	0.0192071	0.50099	-4.15285
chr8	28494205	28574267	+	ENSG00000104290.11	protein_coding	FZD3	7976	frizzled class receptor 3	Fz-3	13786	0.68841	3.25441	2.50695	0.0194491	0.50099	-3.65337
chr22	39077067	39087743	+	ENSG00000239713.9	protein_coding	APOBEC3G	60489	apolipoprotein B mRNA editing enzyme catalytic subunit 3G	A3G|ARCD|ARP-9|ARP9|CEM-15|CEM15|MDS019|bK150C2.7|dJ494G10.1	5375	0.424997	4.66102	2.50658	0.0194655	0.50099	-4.06762
chr1	28199456	28233029	-	ENSG00000126698.11	protein_coding	DNAJC8	22826	DnaJ heat shock protein family (Hsp40) member C8	HSPC331|SPF31	2892	0.298804	6.02365	2.5065	0.0194686	0.50099	-4.31405
chr14	100537147	100587413	-	ENSG00000183092.16	protein_coding	BEGAIN	57596	brain enriched guanylate kinase associated	-	7878	-0.869001	1.43269	-2.50619	0.0194822	0.50099	-3.29001
chr2	28751640	28802940	+	ENSG00000213639.10	protein_coding	PPP1CB	5500	protein phosphatase 1 catalytic subunit beta	HEL-S-80p|MP|NSLH2|PP-1B|PP1B|PP1beta|PP1c|PPP1CD|PPP1beta	5760	-0.236932	6.77697	-2.50515	0.0195271	0.50099	-4.38189
chr1	228106679	228109312	-	ENSG00000162910.19	protein_coding	MRPL55	128308	mitochondrial ribosomal protein L55	AAVG5835|L55nt|MRP-L55|PRO19675	1886	-0.273594	5.41488	-2.50359	0.019595	0.50099	-4.20544
chr15	36579626	36810248	+	ENSG00000186073.14	protein_coding	C15orf41	NA	NA	NA	9278	-0.584045	2.5072	-2.50297	0.0196221	0.50099	-3.54686
chr4	184755595	184826818	-	ENSG00000151726.14	protein_coding	ACSL1	2180	acyl-CoA synthetase long chain family member 1	ACS1|FACL1|FACL2|LACS|LACS1|LACS2	6284	0.39679	4.64521	2.50105	0.0197058	0.50099	-4.04564
chr4	37590800	37686376	-	ENSG00000181826.10	protein_coding	RELL1	768211	RELT like 1	-	4214	-0.691886	2.91227	-2.50011	0.019747	0.50099	-3.62019
chr6	139240061	139291998	-	ENSG00000164440.15	protein_coding	TXLNB	167838	taxilin beta	C6orf198|LST001|MDP77|dJ522B19.2	4796	-0.995813	1.2009	-2.49999	0.0197523	0.50099	-3.24493
chr4	185396021	185400628	+	ENSG00000186352.9	protein_coding	ANKRD37	353322	ankyrin repeat domain 37	Lrp2bp	2253	-0.744796	2.49335	-2.49996	0.0197536	0.50099	-3.50836
chr14	77274956	77320883	-	ENSG00000009830.12	protein_coding	POMT2	29954	protein O-mannosyltransferase 2	LGMD2N|LGMDR14|MDDGA2|MDDGB2|MDDGC2	10007	0.430284	3.55406	2.49909	0.0197918	0.50099	-3.80013
chr15	41837775	41848147	+	ENSG00000243708.10	protein_coding	PLA2G4B	100137049	phospholipase A2 group IVB	HsT16992|cPLA2-beta	4446	1.06743	1.83131	2.50024	0.0198077	0.50099	-3.3836
chr1	6264269	6394391	-	ENSG00000097021.19	protein_coding	ACOT7	11332	acyl-CoA thioesterase 7	ACH1|ACT|BACH|CTE-II|LACH|LACH1|hBACH	4124	1.08072	2.2874	2.50932	0.0198463	0.50099	-3.44115
chr2	24793136	24822376	+	ENSG00000138092.11	protein_coding	CENPO	79172	centromere protein O	CENP-O|ICEN-36|MCM21R	5518	0.476134	2.92425	2.4976	0.0198576	0.50099	-3.65484
chr4	705748	770640	+	ENSG00000185619.18	protein_coding	PCGF3	10336	polycomb group ring finger 3	DONG1|RNF3|RNF3A	7425	0.269688	6.98526	2.49609	0.0199242	0.50099	-4.41767
chr1	3889125	3900293	-	ENSG00000198912.11	protein_coding	C1orf174	339448	chromosome 1 open reading frame 174	-	4388	-0.330814	5.20162	-2.49584	0.019935	0.50099	-4.18843
chr11	832887	839831	+	ENSG00000177697.19	protein_coding	CD151	977	CD151 molecule (Raph blood group)	GP27|MER2|PETA-3|RAPH|SFA1|TSPAN24	3894	0.944627	2.42823	2.50174	0.0200087	0.50099	-3.52157
chr20	61953469	62065810	-	ENSG00000130699.18	protein_coding	TAF4	6874	TATA-box binding protein associated factor 4	TAF2C|TAF2C1|TAF4A|TAFII130|TAFII135	9808	0.339517	3.81829	2.49395	0.020019	0.50099	-3.87865
chr19	14087851	14091036	-	ENSG00000141858.12	protein_coding	SAMD1	90378	sterile alpha motif domain containing 1	-	2295	0.288985	6.36408	2.49384	0.0200236	0.50099	-4.38411
chr7	77193369	77199848	-	ENSG00000127951.7	protein_coding	FGL2	10875	fibrinogen like 2	T49|pT49	4606	1.2008	1.77647	2.50126	0.0200301	0.50099	-3.3551
chr19	55452985	55462343	-	ENSG00000063241.8	protein_coding	ISOC2	79763	isochorismatase domain containing 2	-	4408	-0.589529	3.07444	-2.4929	0.0200654	0.50099	-3.74898
chr16	70251983	70289707	-	ENSG00000090861.17	protein_coding	AARS1	16	alanyl-tRNA synthetase 1	AARS|CMT2N|EIEE29	10248	0.345731	6.30382	2.49466	0.0200977	0.50099	-4.37554
chr12	47753916	47782751	+	ENSG00000211584.14	protein_coding	SLC48A1	55652	solute carrier family 48 member 1	HRG-1|HRG1|hHRG-1	4912	0.344938	4.14546	2.49008	0.0201912	0.50099	-3.9733
chr7	100126785	100128495	+	ENSG00000214309.5	protein_coding	MBLAC1	255374	metallo-beta-lactamase domain containing 1	-	1477	-1.10758	0.620502	-2.48992	0.0201988	0.50099	-3.23269
chr22	21697536	21735794	-	ENSG00000100027.16	protein_coding	YPEL1	29799	yippee like 1	FKSG3	4681	0.771777	1.8237	2.48745	0.0203094	0.50099	-3.42508
chr4	53459301	53701405	-	ENSG00000072201.14	protein_coding	LNX1	84708	ligand of numb-protein X 1	LNX|MPDZ|PDZRN2	5624	-0.754579	2.10641	-2.48666	0.0203449	0.50099	-3.45544
chr1	229321011	229343294	-	ENSG00000154429.11	protein_coding	CCSAP	126731	centriole, cilia and spindle associated protein	C1orf96|CSAP	6257	-0.426183	5.06576	-2.48774	0.0204075	0.50099	-4.18656
chr5	34915677	34925996	+	ENSG00000113460.13	protein_coding	BRIX1	55299	biogenesis of ribosomes BRX1	BRIX|BXDC2	4710	-0.490499	5.28031	-2.50371	0.0204191	0.50099	-4.17882
chr22	37125843	37175054	-	ENSG00000100385.14	protein_coding	IL2RB	3560	interleukin 2 receptor subunit beta	CD122|IL15RB|IMD63|P70-75	4621	0.526695	5.19264	2.52037	0.0204207	0.50099	-4.20634
chr10	17228241	17237593	+	ENSG00000026025.16	protein_coding	VIM	7431	vimentin	-	5176	-0.236913	8.78332	-2.48482	0.020428	0.50099	-4.50773
chr19	1876810	1885496	-	ENSG00000129968.16	protein_coding	ABHD17A	81926	abhydrolase domain containing 17A, depalmitoylase	C19orf27|FAM108A1	6088	0.239072	7.54961	2.48381	0.0204738	0.50099	-4.47706
chr18	12658043	12725740	+	ENSG00000128789.21	protein_coding	PSMG2	56984	proteasome assembly chaperone 2	CLAST3|HCCA3|HsT1707|MDS003|PAC2|TNFSF5IP1	2759	-0.309152	5.3525	-2.48351	0.0204874	0.50099	-4.23148
chr15	90930180	90954093	+	ENSG00000140553.18	protein_coding	UNC45A	55898	unc-45 myosin chaperone A	GC-UNC45|GCUNC-45|GCUNC45|IRO039700|SMAP-1|SMAP1|UNC-45A	7498	0.437609	5.73576	2.50422	0.0206093	0.50099	-4.31928
chr11	83193712	83260694	+	ENSG00000137494.14	protein_coding	ANKRD42	338699	ankyrin repeat domain 42	PPP1R79|SARP	6751	-0.425946	3.72844	-2.4807	0.0206155	0.50099	-3.87644
chr8	24294069	24359014	+	ENSG00000042980.13	protein_coding	ADAM28	10863	ADAM metallopeptidase domain 28	ADAM 28|MDC-L|MDCL|eMDC II|eMDCII	9318	-1.75876	-0.244291	-2.48052	0.0206236	0.50099	-3.16483
chrX	53094145	53170914	+	ENSG00000232593.7	protein_coding	KANTR	102723508	KDM5C adjacent transcript	LINC01155|Spasm	9927	-0.293716	5.79577	-2.4801	0.0206427	0.50099	-4.32254
chr9	131852928	132079867	-	ENSG00000160563.14	protein_coding	MED27	9442	mediator complex subunit 27	CRAP34|CRSP34|CRSP8|MED3|TRAP37	3857	-0.65238	2.87461	-2.47661	0.0208027	0.503836	-3.67262
chr11	9573670	9593457	+	ENSG00000166483.11	protein_coding	WEE1	7465	WEE1 G2 checkpoint kinase	WEE1A|WEE1hu	9251	0.938737	0.751987	2.47475	0.0208883	0.504873	-3.24265
chr11	76860867	77026797	+	ENSG00000078124.12	protein_coding	ACER3	55331	alkaline ceramidase 3	APHC|PHCA|PLDECO	8442	0.387589	4.08782	2.47116	0.0210548	0.50717	-3.96333
chr16	4846665	4882401	+	ENSG00000118900.15	protein_coding	UBN1	29855	ubinuclein 1	VT|VT4	8592	0.237727	6.57621	2.47071	0.0210759	0.50717	-4.44636
chr5	149271859	149343637	+	ENSG00000157510.14	protein_coding	AFAP1L1	134265	actin filament associated protein 1 like 1	-	6568	1.88575	0.568689	2.47836	0.0211889	0.50717	-3.20317
chr2	127638381	127681786	-	ENSG00000072163.20	protein_coding	LIMS2	55679	LIM zinc finger domain containing 2	LGMD2W|MDRCMTT|PINCH-2|PINCH2	8731	-0.420604	4.20623	-2.46783	0.0212105	0.50717	-4.03661
chr2	216081866	216102783	+	ENSG00000163449.11	protein_coding	TMEM169	92691	transmembrane protein 169	-	3628	-0.521803	2.67191	-2.46649	0.0212731	0.50717	-3.66301
chrX	129779949	129795201	+	ENSG00000122122.10	protein_coding	SASH3	54440	SAM and SH3 domain containing 3	753P9|CXorf9|HACS2|SH3D6C|SLY	2741	0.278834	7.68195	2.46426	0.0213784	0.50717	-4.52445
chr16	67154185	67159909	-	ENSG00000102871.16	protein_coding	TRADD	8717	TNFRSF1A associated via death domain	Hs.89862	2173	-0.30832	6.05402	-2.46371	0.0214041	0.50717	-4.39735
chr2	238238267	238240662	-	ENSG00000144485.11	protein_coding	HES6	55502	hes family bHLH transcription factor 6	C-HAIRY1|HES-6|bHLHb41|bHLHc23	1954	1.20085	0.438808	2.46343	0.0214175	0.50717	-3.20907
chr9	133376366	133406096	+	ENSG00000198870.8	protein_coding	STKLD1	169436	serine/threonine kinase like domain containing 1	C9orf96|SgK071|Sk521	4409	0.813985	1.6648	2.46291	0.021442	0.50717	-3.36331
chr3	172630249	172711218	-	ENSG00000144959.11	protein_coding	NCEH1	57552	neutral cholesterol ester hydrolase 1	AADACL1|NCEH	4808	-0.578232	2.18179	-2.46281	0.0214469	0.50717	-3.52931
chr1	54779712	54801323	-	ENSG00000006555.11	protein_coding	TTC22	55001	tetratricopeptide repeat domain 22	-	6111	0.4254	4.18413	2.46261	0.0214564	0.50717	-4.06823
chr7	549197	727650	-	ENSG00000188191.15	protein_coding	PRKAR1B	5575	protein kinase cAMP-dependent type I regulatory subunit beta	PRKAR1	4491	0.248659	5.49666	2.46029	0.0215665	0.508753	-4.32156
chr13	77044657	77327094	-	ENSG00000005810.18	protein_coding	MYCBP2	23077	MYC binding protein 2	Myc-bp2|PAM|PHR1|Phr	15987	0.319573	9.06033	2.46635	0.0216378	0.509417	-4.55647
chr13	48053323	48095131	-	ENSG00000136146.15	protein_coding	MED4	29079	mediator complex subunit 4	ARC36|DRIP36|HSPC126|TRAP36|VDRIP	2590	-0.277631	5.47439	-2.4553	0.0218048	0.512327	-4.31019
chr1	205227946	205285632	+	ENSG00000133069.17	protein_coding	TMCC2	9911	transmembrane and coiled-coil domain family 2	HUCEP11	5822	1.10171	1.19124	2.45096	0.0220147	0.515025	-3.29539
chr19	37696371	37719761	-	ENSG00000198182.13	protein_coding	ZNF607	84775	zinc finger protein 607	-	4703	0.470049	3.83504	2.45077	0.0220234	0.515025	-3.9638
chr20	35615829	35621094	+	ENSG00000061656.10	protein_coding	SPAG4	6676	sperm associated antigen 4	CT127|SUN4	2348	-1.17257	0.454494	-2.45018	0.0220523	0.515025	-3.2395
chr14	102224500	102305190	-	ENSG00000080823.23	protein_coding	MOK	5891	MOK protein kinase	RAGE|RAGE-1|RAGE1|STK30	10986	-0.829725	1.142	-2.44932	0.0220943	0.515025	-3.33976
chr20	10435305	10636829	+	ENSG00000149346.15	protein_coding	SLX4IP	128710	SLX4 interacting protein	C20orf94|bA204H22.1|bA254M13.1|dJ1099D15.3	6486	-0.707406	3.7145	-2.46818	0.0222642	0.517961	-3.92919
chr6	96924620	97140754	+	ENSG00000186231.17	protein_coding	KLHL32	114792	kelch like family member 32	BKLHD5|KIAA1900|UG0030H05|dJ21F7.1	4124	-0.810331	2.08417	-2.44471	0.0223193	0.518221	-3.56046
chr10	46005088	46030714	-	ENSG00000266412.5	protein_coding	NCOA4	8031	nuclear receptor coactivator 4	ARA70|ELE1|PTC3|RFG	4079	0.265756	7.17176	2.44299	0.022404	0.518294	-4.54575
chr8	11486894	11564599	+	ENSG00000136573.14	protein_coding	BLK	640	BLK proto-oncogene, Src family tyrosine kinase	MODY11	4904	0.758819	2.47545	2.44286	0.0224103	0.518294	-3.65378
chr20	33731657	33792269	+	ENSG00000131061.14	protein_coding	ZNF341	84905	zinc finger protein 341	HIES3	5457	0.507428	3.32163	2.44054	0.0225249	0.519269	-3.82976
chr11	77322017	77474635	-	ENSG00000149269.10	protein_coding	PAK1	5058	p21 (RAC1) activated kinase 1	IDDMSSD|PAKalpha|alpha-PAK|p65-PAK	6021	0.37604	5.05164	2.44023	0.0225405	0.519269	-4.24547
chr12	50504985	50748657	+	ENSG00000066084.13	protein_coding	DIP2B	57609	disco interacting protein 2 homolog B	-	10351	-0.276365	7.19457	-2.43927	0.0225882	0.519352	-4.54817
chr9	87966441	87974753	-	ENSG00000156345.18	protein_coding	CDK20	23552	cyclin dependent kinase 20	CCRK|CDCH|P42|PNQALRE	5727	0.447272	4.14458	2.43824	0.0226395	0.519519	-4.07865
chr19	55635016	55643470	+	ENSG00000213015.9	protein_coding	ZNF580	51157	zinc finger protein 580	-	2604	0.315471	5.53918	2.43585	0.0227587	0.52124	-4.37841
chr16	90019629	90044975	+	ENSG00000141013.17	protein_coding	GAS8	2622	growth arrest specific 8	CILD33|DRC4|GAS11	5615	-0.526488	2.72475	-2.4319	0.0229568	0.523268	-3.74013
chr1	45326895	45328679	+	ENSG00000186603.6	protein_coding	HPDL	84842	4-hydroxyphenylpyruvate dioxygenase like	4-HPPD-L|GLOXD1	1785	-1.2603	0.294169	-2.43165	0.0229692	0.523268	-3.26423
chr10	47501854	47523638	-	ENSG00000204172.12	protein_coding	AGAP9	642517	ArfGAP with GTPase domain, ankyrin repeat and PH domain 9	AGAP-9|CTGLF6|bA301J7.2	2387	-0.357315	4.30179	-2.43143	0.0229803	0.523268	-4.12219
chrX	52926402	52995472	-	ENSG00000268350.7	protein_coding	FAM156A	29057	family with sequence similarity 156 member A	PRO0659|TMEM29	6608	1.34246	-0.220243	2.42968	0.0230692	0.52424	-3.24852
chr21	17593653	17612945	-	ENSG00000154640.15	protein_coding	BTG3	10950	BTG anti-proliferation factor 3	ANA|ANA/BTG3|APRO4|TOB5|TOB55|TOFA	2304	-0.743381	2.29026	-2.42742	0.0231838	0.52424	-3.59791
chr15	79898840	79923702	-	ENSG00000180953.11	protein_coding	ST20	400410	suppressor of tumorigenicity 20	HCCS-1	1614	-0.87266	2.06035	-2.42702	0.0232042	0.52424	-3.51961
chr17	30115521	30186475	+	ENSG00000126653.18	protein_coding	NSRP1	84081	nuclear speckle splicing regulatory protein 1	CCDC55|HSPC095|NSrp70	4806	-0.281217	5.58463	-2.42659	0.0232259	0.52424	-4.38419
chr3	128153481	128408646	+	ENSG00000132394.11	protein_coding	EEFSEC	60678	eukaryotic elongation factor, selenocysteine-tRNA specific	EFSEC|SELB	2394	0.354849	4.90169	2.42512	0.0233009	0.52424	-4.28258
chr4	672436	674330	-	ENSG00000169020.10	protein_coding	ATP5ME	521	ATP synthase membrane subunit e	ATP5I|ATP5K	932	0.33364	4.35548	2.4248	0.0233171	0.52424	-4.15642
chr11	117285207	117316259	-	ENSG00000186318.16	protein_coding	BACE1	23621	beta-secretase 1	ASP2|BACE|HSPC104	7190	-0.661778	2.77872	-2.42447	0.0233341	0.52424	-3.73977
chr12	9715860	9733299	-	ENSG00000184293.7	protein_coding	CLECL1	160365	C-type lectin like 1	DCAL-1|DCAL1	1721	-1.05179	2.4246	-2.42906	0.0234891	0.525121	-3.56922
chr13	52377167	52416373	-	ENSG00000136114.17	protein_coding	THSD1	55901	thrombospondin type 1 domain containing 1	ANIB12|TMTSP|UNQ3010	3705	-1.04819	0.523568	-2.41991	0.0235687	0.525121	-3.30301
chr22	17084954	17115694	+	ENSG00000177663.14	protein_coding	IL17RA	23765	interleukin 17 receptor A	CANDF5|CD217|CDw217|IL-17RA|IL17R|IMD51|hIL-17R	9036	0.238406	8.20464	2.41972	0.0235782	0.525121	-4.62975
chr8	38996869	39105261	+	ENSG00000168615.12	protein_coding	ADAM9	8754	ADAM metallopeptidase domain 9	CORD9|MCMP|MDC9|Mltng	7030	1.32723	0.461315	2.41938	0.0235962	0.525121	-3.29243
chr11	75434640	75525941	-	ENSG00000158555.15	protein_coding	GDPD5	81544	glycerophosphodiester phosphodiesterase domain containing 5	GDE2|PP1665	9905	0.539749	4.6149	2.43741	0.0236052	0.525121	-4.20195
chr6	26216975	26217483	+	ENSG00000277075.2	protein_coding	H2AC8	3012	H2A clustered histone 8	H2A.1|H2A.2|H2A/a|H2AC4|H2AFA|HIST1H2AE	509	2.14374	-0.515585	2.41852	0.0236404	0.525121	-3.27019
chr12	118376555	118418033	+	ENSG00000111707.12	protein_coding	SUDS3	64426	SDS3 homolog, SIN3A corepressor complex component	SAP45|SDS3	5558	-0.236628	5.76989	-2.41647	0.0237471	0.525873	-4.46301
chr19	35143250	35154302	+	ENSG00000221946.8	protein_coding	FXYD7	53822	FXYD domain containing ion transport regulator 7	-	1796	-0.981501	1.55996	-2.41227	0.0239662	0.525873	-3.49062
chr12	52948871	52952906	+	ENSG00000111057.11	protein_coding	KRT18	3875	keratin 18	CK-18|CYK18|K18	3069	0.79028	1.6588	2.41213	0.0239735	0.525873	-3.47931
chr1	222712553	222735196	+	ENSG00000162819.12	protein_coding	BROX	148362	BRO1 domain and CAAX motif containing	C1orf58	4980	-0.306477	5.95799	-2.41206	0.023977	0.525873	-4.4645
chr12	2876258	2889524	+	ENSG00000171792.11	protein_coding	RHNO1	83695	RAD9-HUS1-RAD1 interacting nuclear orphan 1	C12orf32|HKMT1188|RHINO	2644	-0.34168	4.81628	-2.41183	0.0239891	0.525873	-4.27941
chr8	86468257	86514357	-	ENSG00000176623.12	protein_coding	RMDN1	51115	regulator of microtubule dynamics 1	CGI-90|FAM82B|RMD-1|RMD1	5552	-0.290568	6.1362	-2.41162	0.0240003	0.525873	-4.50069
chr12	132986365	133032952	+	ENSG00000198393.8	protein_coding	ZNF26	7574	zinc finger protein 26	HEL-179|KOX20	20862	-0.259375	5.78239	-2.41136	0.0240141	0.525873	-4.43782
chr18	13217498	13652755	+	ENSG00000168675.18	protein_coding	LDLRAD4	753	low density lipoprotein receptor class A domain containing 4	C18orf1	16759	-0.270031	6.35106	-2.41065	0.0240514	0.525873	-4.52891
chr17	60041008	60078922	-	ENSG00000068097.15	protein_coding	HEATR6	63897	HEAT repeat containing 6	ABC1	7045	-0.389019	4.79456	-2.41019	0.0240756	0.525873	-4.26266
chr10	1039152	1049170	-	ENSG00000067064.11	protein_coding	IDI1	3422	isopentenyl-diphosphate delta isomerase 1	IPP1|IPPI1	4345	-0.500651	5.59679	-2.44071	0.0242024	0.52698	-4.38307
chr11	289126	296107	+	ENSG00000142102.16	protein_coding	PGGHG	80162	protein-glucosylgalactosylhydroxylysine glucosidase	ATHL1	5269	0.44843	10.842	2.46309	0.0242156	0.52698	-4.62549
chr9	75890644	76362975	+	ENSG00000099139.14	protein_coding	PCSK5	5125	proprotein convertase subtilisin/kexin type 5	PC5|PC6|PC6A|SPC6	13341	-0.332533	6.33335	-2.4071	0.0242999	0.527839	-4.54018
chr2	30146941	30160533	+	ENSG00000119801.13	protein_coding	YPEL5	51646	yippee like 5	CGI-127	3421	-0.752253	6.92851	-2.50369	0.0243682	0.52835	-4.48962
chr11	60455846	60470752	+	ENSG00000156738.18	protein_coding	MS4A1	931	membrane spanning 4-domains A1	B1|Bp35|CD20|CVID5|LEU-16|MS4A2|S7	4770	-1.34842	2.7602	-2.46962	0.0244772	0.528991	-3.69733
chr11	16777297	17014414	-	ENSG00000166689.16	protein_coding	PLEKHA7	144100	pleckstrin homology domain containing A7	-	10978	-1.00516	1.89485	-2.40491	0.0244874	0.528991	-3.59284
chr15	84980440	85139145	+	ENSG00000073417.15	protein_coding	PDE8A	5151	phosphodiesterase 8A	HsT19550	8004	-0.314287	5.57907	-2.40061	0.0245851	0.530131	-4.45041
chr13	113158648	113172386	+	ENSG00000126231.15	protein_coding	PROZ	8858	protein Z, vitamin K dependent plasma glycoprotein	PZ	1675	-1.65569	-0.301885	-2.39924	0.0246585	0.530743	-3.30899
chr13	45777242	45851753	-	ENSG00000215475.5	protein_coding	SIAH3	283514	siah E3 ubiquitin protein ligase family member 3	-	7075	0.908146	2.13695	2.39578	0.0248457	0.531365	-3.61396
chr1	16562319	16613562	-	ENSG00000219481.10	protein_coding	NBPF1	55672	NBPF member 1	AB13|AB14|AB23|AD2|NBG|NBPF	12212	0.398091	3.86408	2.39551	0.0248601	0.531365	-4.08752
chr8	144107726	144118328	+	ENSG00000179698.14	protein_coding	WDR97	340390	WD repeat domain 97	KIAA1875	8980	1.33631	3.68664	2.48539	0.0248833	0.531365	-3.88547
chr14	101964573	102056443	+	ENSG00000197102.12	protein_coding	DYNC1H1	1778	dynein cytoplasmic 1 heavy chain 1	CMT2O|DHC1|DHC1a|DNCH1|DNCL|DNECL|DYHC|Dnchc1|HL-3|SMALED1|p22	36789	0.237024	8.75579	2.39393	0.0249459	0.531365	-4.69218
chr10	32900318	33005792	-	ENSG00000150093.19	protein_coding	ITGB1	3688	integrin subunit beta 1	CD29|FNRB|GPIIA|MDF2|MSK12|VLA-BETA|VLAB	6012	0.668098	5.80377	2.47626	0.0249513	0.531365	-4.45119
chr21	45493572	45573365	-	ENSG00000173638.19	protein_coding	SLC19A1	6573	solute carrier family 19 member 1	CHMD|FOLT|IFC-1|IFC1|REFC|RFC|RFC1|RFT-1|hRFC|hSLC19A1	11235	0.437072	4.22396	2.39331	0.0249801	0.531365	-4.18693
chr12	57819927	57846729	-	ENSG00000175215.11	protein_coding	CTDSP2	10106	CTD small phosphatase 2	OS4|PSR2|SCP2	5432	0.244589	9.0176	2.39289	0.0250028	0.531365	-4.69741
chr1	6205475	6221299	+	ENSG00000158286.13	protein_coding	RNF207	388591	ring finger protein 207	C1orf188	6595	-1.14393	0.830151	-2.38893	0.0252198	0.534173	-3.45098
chr19	49528003	49546962	+	ENSG00000142552.8	protein_coding	RCN3	57333	reticulocalbin 3	RLP49	1703	0.487928	3.87579	2.38882	0.0252255	0.534173	-4.10274
chr12	124946825	124989131	-	ENSG00000150990.8	protein_coding	DHX37	57647	DEAH-box helicase 37	DDX37|Dhr1|NEDBAVC|SRXY11	6627	-0.242219	5.92972	-2.38791	0.0252759	0.534282	-4.53104
chr7	100119634	100125508	+	ENSG00000166997.8	protein_coding	CNPY4	245812	canopy FGF signaling regulator 4	PRAT4B	2451	-0.298598	4.88672	-2.38512	0.0254296	0.536569	-4.36065
chr15	78921058	78949574	-	ENSG00000103811.17	protein_coding	CTSH	1512	cathepsin H	ACC-4|ACC-5|ACC4|ACC5|CPSB	5892	-0.574459	2.95752	-2.38297	0.025549	0.53745	-3.88159
chr12	54121277	54189008	-	ENSG00000123415.15	protein_coding	SMUG1	23583	single-strand-selective monofunctional uracil-DNA glycosylase 1	FDG|HMUDG|UNG3	6027	0.385218	3.82156	2.38209	0.0255982	0.53745	-4.09082
chr5	122063195	122078360	-	ENSG00000113083.14	protein_coding	LOX	4015	lysyl oxidase	AAT10	5547	-1.55941	-0.479651	-2.38181	0.0256136	0.53745	-3.32335
chr11	124747474	124752255	-	ENSG00000019102.12	protein_coding	VSIG2	23584	V-set and immunoglobulin domain containing 2	2210413P10Rik|CTH|CTXL	1447	-1.66617	-0.684781	-2.3801	0.0257093	0.53745	-3.32691
chr19	18001132	18014102	+	ENSG00000105643.10	protein_coding	ARRDC2	27106	arrestin domain containing 2	CLONE24945|PP2703	4637	-0.445956	8.08087	-2.42843	0.0258821	0.53745	-4.65914
chr19	55485188	55487568	+	ENSG00000090971.5	protein_coding	NAT14	57106	N-acetyltransferase 14 (putative)	KLP1	1979	0.989439	1.56363	2.37695	0.0258862	0.53745	-3.49332
chr1	148102046	148152322	-	ENSG00000263956.6	protein_coding	NBPF11	200030	NBPF member 11	NBPF24	5947	-0.256459	5.26525	-2.37609	0.0259344	0.53745	-4.43277
chr19	9560353	9584533	-	ENSG00000197961.11	protein_coding	ZNF121	7675	zinc finger protein 121	D19S204|ZHC32|ZNF20	7251	-0.255148	6.92213	-2.37573	0.0259549	0.53745	-4.64554
chr1	34865436	34929650	-	ENSG00000116544.12	protein_coding	DLGAP3	58512	DLG associated protein 3	DAP3|SAPAP3	4042	-0.946117	1.71544	-2.37449	0.026025	0.53745	-3.56258
chr17	43483865	43610338	+	ENSG00000067596.12	protein_coding	DHX8	1659	DEAH-box helicase 8	DDX8|Dhr2|HRH1|PRP22|PRPF22	10439	-0.251584	6.51682	-2.37407	0.0260485	0.53745	-4.63503
chr7	99027438	99144100	-	ENSG00000198742.9	protein_coding	SMURF1	57154	SMAD specific E3 ubiquitin protein ligase 1	-	6276	-0.309791	5.47519	-2.37237	0.0261454	0.53745	-4.49315
chr12	12974870	13000265	-	ENSG00000013583.10	protein_coding	HEBP1	50865	heme binding protein 1	HBP|HEBP	3428	-0.461659	3.30663	-2.37159	0.0261897	0.53745	-3.9852
chr11	134331874	134378341	+	ENSG00000149328.15	protein_coding	GLB1L2	89944	galactosidase beta 1 like 2	MST114|MSTP114	7280	0.761048	1.13715	2.37139	0.0262008	0.53745	-3.52452
chr14	22946228	22957161	-	ENSG00000092036.18	protein_coding	HAUS4	54930	HAUS augmin like complex subunit 4	C14orf94	2539	0.370134	4.09581	2.37132	0.026205	0.53745	-4.17927
chr1	247121975	247172016	-	ENSG00000196418.12	protein_coding	ZNF124	7678	zinc finger protein 124	HZF-16|HZF16|ZK7	4517	-0.507758	2.95528	-2.37126	0.0262083	0.53745	-3.88985
chr4	103019868	103085829	-	ENSG00000164038.16	protein_coding	SLC9B2	133308	solute carrier family 9 member B2	NHA2|NHE10|NHEDC2	8611	-0.476102	3.9693	-2.37048	0.0262527	0.53745	-4.16239
chr9	37879400	37904353	-	ENSG00000122696.14	protein_coding	SLC25A51	92014	solute carrier family 25 member 51	CG7943|MCART1	3397	-0.429057	4.08712	-2.36993	0.0262839	0.53745	-4.18783
chr5	151181052	151224093	-	ENSG00000198624.13	protein_coding	CCDC69	26112	coiled-coil domain containing 69	-	4941	0.213863	7.93788	2.36905	0.0263343	0.53745	-4.72324
chr15	43510958	43531620	+	ENSG00000166963.13	protein_coding	MAP1A	4130	microtubule associated protein 1A	MAP1L|MTAP1A	10646	-0.989261	1.09463	-2.369	0.0263371	0.53745	-3.49402
chr16	5024844	5034141	-	ENSG00000103174.13	protein_coding	NAGPA	51172	N-acetylglucosamine-1-phosphodiester alpha-N-acetylglucosaminidase	APAA|UCE	5484	-0.26448	5.30257	-2.36601	0.0265091	0.540026	-4.46994
chr15	57706695	57782762	+	ENSG00000255529.9	protein_coding	POLR2M	81488	RNA polymerase II subunit M	GCOM1|GRINL1A|Gdown|Gdown1	6508	-0.367263	4.84895	-2.36342	0.0266584	0.541321	-4.35363
chr2	26190635	26244672	-	ENSG00000084754.12	protein_coding	HADHA	3030	hydroxyacyl-CoA dehydrogenase trifunctional multienzyme complex subunit alpha	ECHA|GBP|HADH|LCEH|LCHAD|MTPA|TP-ALPHA	4331	0.194595	7.31233	2.36331	0.0266645	0.541321	-4.71081
chr6	31158547	31167159	+	ENSG00000137310.12	protein_coding	TCF19	6941	transcription factor 19	SC1|TCF-19	3533	3.14223	-1.96211	2.38403	0.0267622	0.542371	-3.37061
chr16	30778456	30787205	-	ENSG00000102870.6	protein_coding	ZNF629	23361	zinc finger protein 629	ZNF|ZNF65	6083	0.327675	4.25036	2.36001	0.0268564	0.5424	-4.23406
chr16	29381354	29404029	-	ENSG00000254206.5	protein_coding	NPIPB11	728888	nuclear pore complex interacting protein family member B11	NPIP	4398	-0.555513	2.62444	-2.35934	0.0268951	0.5424	-3.82651
chr17	59565558	59608345	+	ENSG00000108406.10	protein_coding	DHX40	79665	DEAH-box helicase 40	ARG147|DDX40|PAD	5906	-0.244689	5.45867	-2.35852	0.0269431	0.5424	-4.5071
chr16	23061406	23149270	-	ENSG00000103404.14	protein_coding	USP31	57478	ubiquitin specific peptidase 31	-	12017	0.597076	2.84423	2.35792	0.0269782	0.5424	-3.89019
chr4	139028112	139177218	-	ENSG00000109381.20	protein_coding	ELF2	1998	E74 like ETS transcription factor 2	EU32|NERF|NERF-1A|NERF-1B|NERF-1a,b|NERF-2	8560	-0.347469	6.3245	-2.36314	0.0269943	0.5424	-4.62552
chr9	110243810	110256507	-	ENSG00000136810.13	protein_coding	TXN	7295	thioredoxin	TRDX|TRX|TRX1	1010	-0.386423	3.7804	-2.35645	0.0270641	0.5424	-4.15103
chr16	5084284	5097795	-	ENSG00000118894.15	protein_coding	EEF2KMT	196483	eukaryotic elongation factor 2 lysine methyltransferase	EFM3|FAM86A|SB153|eEF2-KMT	3135	-0.508357	2.35482	-2.35609	0.0270855	0.5424	-3.833
chr1	64470129	64693058	+	ENSG00000158966.16	protein_coding	CACHD1	57685	cache domain containing 1	-	7022	-0.382687	5.05623	-2.35468	0.0271681	0.542724	-4.44432
chr8	11795573	11839304	+	ENSG00000079459.13	protein_coding	FDFT1	2222	farnesyl-diphosphate farnesyltransferase 1	DGPT|ERG9|SQS|SQSD|SS	5197	0.47962	6.17466	2.39727	0.0271937	0.542724	-4.57725
chr19	6752160	6767463	-	ENSG00000125731.13	protein_coding	SH2D3A	10045	SH2 domain containing 3A	NSP1	5591	-0.199967	6.58122	-2.35227	0.0273108	0.543153	-4.68202
chr3	97941818	97972457	-	ENSG00000170854.18	protein_coding	RIOX2	84864	ribosomal oxygenase 2	JMJD10|MDIG|MINA|MINA53|NO52|ROX	6880	-0.24803	5.2123	-2.35116	0.0273764	0.543153	-4.48449
chr5	138610967	138935034	+	ENSG00000044115.21	protein_coding	CTNNA1	1495	catenin alpha 1	CAP102|MDPT2	8830	0.672853	1.37385	2.35109	0.0273806	0.543153	-3.62035
chr17	29573475	29594054	-	ENSG00000108262.16	protein_coding	GIT1	28964	GIT ArfGAP 1	-	5650	-0.23625	6.55083	-2.35069	0.0274042	0.543153	-4.69225
chr4	55853648	55905086	+	ENSG00000090989.18	protein_coding	EXOC1	55763	exocyst complex component 1	BM-102|SEC3|SEC3L1|SEC3P	5367	0.236453	6.23135	2.34855	0.0275316	0.543153	-4.63176
chr20	49632945	49713878	-	ENSG00000158470.5	protein_coding	B4GALT5	9334	beta-1,4-galactosyltransferase 5	B4Gal-T5|BETA4-GALT-IV|beta4Gal-T5|beta4GalT-V|gt-V	4722	0.520479	3.33987	2.34841	0.0275399	0.543153	-4.09457
chrX	154483717	154486615	-	ENSG00000102178.13	protein_coding	UBL4A	8266	ubiquitin like 4A	DX254E|DXS254E|G6PD|GDX|GET5|MDY2|TMA24|UBL4	2575	0.399392	5.07985	2.34869	0.0276467	0.543153	-4.47048
chr6	31142439	31158238	-	ENSG00000204536.14	protein_coding	CCHCR1	54535	coiled-coil alpha-helical rod protein 1	C6orf18|HCR|SBP|pg8	5182	3.46321	-1.41857	2.38156	0.027675	0.543153	-3.38696
chr3	45001548	45036071	+	ENSG00000163815.6	protein_coding	CLEC3B	7123	C-type lectin domain family 3 member B	TN|TNA	985	2.04073	-0.704774	2.34586	0.0276923	0.543153	-3.38928
chr5	83471618	83582303	+	ENSG00000038427.16	protein_coding	VCAN	1462	versican	CSPG2|ERVR|GHAP|PG-M|WGN|WGN1	14678	1.50949	0.715877	2.3454	0.0277197	0.543153	-3.42678
chr5	140698680	140706686	+	ENSG00000146007.11	protein_coding	ZMAT2	153527	zinc finger matrin-type 2	Ptg-12|Snu23	1709	0.297336	5.90374	2.34537	0.0277217	0.543153	-4.6242
chr10	113679162	113730907	+	ENSG00000165806.21	protein_coding	CASP7	840	caspase 7	CASP-7|CMH-1|ICE-LAP3|LICE2|MCH3	3612	-0.513196	4.00474	-2.34314	0.0278552	0.544862	-4.20567
chr1	45340052	45343973	+	ENSG00000132773.12	protein_coding	TOE1	114034	target of EGR1, exonuclease	PCH7|hCaf1z	2358	-0.552622	4.48873	-2.35958	0.028066	0.548077	-4.32432
chr14	102080742	102139699	-	ENSG00000080824.19	protein_coding	HSP90AA1	3320	heat shock protein 90 alpha family class A member 1	EL52|HEL-S-65p|HSP86|HSP89A|HSP90A|HSP90N|HSPC1|HSPCA|HSPCAL1|HSPCAL4|HSPN|Hsp103|Hsp89|Hsp90|LAP-2|LAP2	5097	0.286273	8.7202	2.34047	0.028121	0.548243	-4.79789
chr17	7921859	7929803	-	ENSG00000170049.9	protein_coding	KCNAB3	9196	potassium voltage-gated channel subfamily A regulatory beta subunit 3	AKR6A9|KCNA3.1B|KCNA3B|KV-BETA-3	4580	-0.3619	4.12126	-2.33695	0.0282306	0.548688	-4.29185
chr5	173607145	173616659	-	ENSG00000145919.11	protein_coding	BOD1	91272	biorientation of chromosomes in cell division 1	FAM44B	2386	0.41595	4.97163	2.33932	0.0282368	0.548688	-4.45332
chr11	75260122	75351705	-	ENSG00000137486.17	protein_coding	ARRB1	408	arrestin beta 1	ARB1|ARR1	9888	0.263914	6.18896	2.33563	0.0283113	0.549231	-4.68051
chr5	65563236	65587549	+	ENSG00000113593.12	protein_coding	PPWD1	23398	peptidylprolyl isomerase domain and WD repeat containing 1	-	3777	-0.280065	7.62569	-2.33391	0.0284163	0.549482	-4.77465
chr10	94501434	94613905	+	ENSG00000119969.15	protein_coding	HELLS	3070	helicase, lymphoid specific	ICF4|LSH|Nbla10143|PASG|SMARCA6	10150	-0.880535	2.27385	-2.33094	0.0285995	0.549482	-3.75333
chr6	32968594	32981505	+	ENSG00000204256.13	protein_coding	BRD2	6046	bromodomain containing 2	BRD2-IT1|D6S113E|FSH|FSRG1|NAT|O27.1.1|RING3|RNF3	7403	1.13565	0.375911	2.33049	0.0286271	0.549482	-3.41943
chr11	134224671	134247788	+	ENSG00000151502.11	protein_coding	VPS26B	112936	VPS26, retromer complex component B	Pep8b	6453	0.207315	6.97407	2.32962	0.0286805	0.549482	-4.75905
chr1	54715861	54742657	+	ENSG00000243725.7	protein_coding	TTC4	7268	tetratricopeptide repeat domain 4	CNS1	3488	0.645459	2.04911	2.32753	0.0288101	0.549482	-3.70562
chr10	97446170	97457370	+	ENSG00000171307.19	protein_coding	ZDHHC16	84287	zinc finger DHHC-type palmitoyltransferase 16	APH2|DHHC-16	3039	0.324475	4.85138	2.32732	0.0288233	0.549482	-4.4451
chr22	37943050	37953669	-	ENSG00000128346.11	protein_coding	C22orf23	84645	chromosome 22 open reading frame 23	EVG1|dJ1039K5.6	2283	-0.951125	0.873018	-2.32541	0.0289422	0.549482	-3.55198
chr19	17323223	17334855	-	ENSG00000074855.11	protein_coding	ANO8	57719	anoctamin 8	KIAA1623|TMEM16H	5005	0.276346	6.6612	2.32509	0.0289623	0.549482	-4.74131
chr16	81739097	81962685	+	ENSG00000197943.10	protein_coding	PLCG2	5336	phospholipase C gamma 2	APLAID|FCAS3|PLC-IV|PLC-gamma-2	13375	-1.14026	1.01356	-2.32501	0.0289674	0.549482	-3.56354
chr19	58126248	58155110	-	ENSG00000181894.15	protein_coding	ZNF329	79673	zinc finger protein 329	-	4315	0.388955	4.49875	2.3245	0.0289992	0.549482	-4.37724
chr13	113584721	113641473	+	ENSG00000198176.13	protein_coding	TFDP1	7027	transcription factor Dp-1	DILC|DP1|DRTF1|Dp-1	3744	-0.213631	6.3673	-2.32428	0.029013	0.549482	-4.71693
chr19	18340598	18369950	+	ENSG00000130517.14	protein_coding	PGPEP1	54858	pyroglutamyl-peptidase I	PAP-I|PGI|PGP|PGP-I|PGPI|Pcp	7509	0.242497	5.91937	2.32424	0.0290151	0.549482	-4.65244
chr8	97273488	97277928	-	ENSG00000180543.5	protein_coding	TSPYL5	85453	TSPY like 5	-	4441	-0.950842	1.91143	-2.32395	0.0290337	0.549482	-3.7246
chr22	37065436	37109713	-	ENSG00000187045.19	protein_coding	TMPRSS6	164656	transmembrane serine protease 6	IRIDA|MT2	4232	1.07274	0.691782	2.32376	0.0290452	0.549482	-3.47972
chr3	48989889	49007153	+	ENSG00000178467.18	protein_coding	P4HTM	54681	prolyl 4-hydroxylase, transmembrane	EGLN4|HIDEA|HIFPH4|P4H-TM|PH-4|PH4|PHD4	7637	-0.239632	6.53811	-2.3235	0.0290619	0.549482	-4.73242
chr11	66848417	66958386	-	ENSG00000173599.15	protein_coding	PC	5091	pyruvate carboxylase	PCB	7302	-0.463191	3.20456	-2.32251	0.0291238	0.549482	-4.09427
chr18	80157232	80247514	-	ENSG00000178184.16	protein_coding	PARD6G	84552	par-6 family cell polarity regulator gamma	PAR-6G|PAR6gamma	4192	-1.33838	-0.0136196	-2.322	0.0291554	0.549482	-3.43772
chr2	55172547	55232563	-	ENSG00000162994.16	protein_coding	CLHC1	130162	clathrin heavy chain linker domain containing 1	C2orf63	6642	0.718945	3.00546	2.32139	0.0291943	0.549482	-3.93261
chr11	118193725	118225094	-	ENSG00000160593.19	protein_coding	JAML	120425	junction adhesion molecule like	AMICA|AMICA1|CREA7-1|CREA7-4|Gm638	8602	0.357833	8.10643	2.34549	0.0292274	0.549482	-4.80085
chr1	10398592	10420511	+	ENSG00000142657.21	protein_coding	PGD	5226	phosphogluconate dehydrogenase	6PGD	3333	0.325272	5.1652	2.32041	0.029256	0.549482	-4.56671
chr19	58228594	58277495	+	ENSG00000198131.14	protein_coding	ZNF544	27300	zinc finger protein 544	-	7216	-0.383666	4.73136	-2.31791	0.0294136	0.551563	-4.45355
chr15	52192322	52295804	-	ENSG00000128833.13	protein_coding	MYO5C	55930	myosin VC	-	10051	-0.998227	0.65775	-2.31682	0.0294829	0.551986	-3.49979
chr5	180494379	180578358	+	ENSG00000113300.13	protein_coding	CNOT6	57472	CCR4-NOT transcription complex subunit 6	CCR4|Ccr4a	6572	0.297028	6.11343	2.3154	0.0295729	0.55238	-4.69017
chr16	67159932	67164570	+	ENSG00000135722.9	protein_coding	FBXL8	55336	F-box and leucine rich repeat protein 8	FBL8	3129	-0.548407	3.31878	-2.31425	0.0296463	0.55238	-4.10982
chr1	151131685	151146664	-	ENSG00000143434.16	protein_coding	SEMA6C	10500	semaphorin 6C	SEMAY|m-SemaY|m-SemaY2	5809	-0.524345	3.56824	-2.31396	0.0296646	0.55238	-4.18367
chr16	27313668	27364778	+	ENSG00000077238.14	protein_coding	IL4R	3566	interleukin 4 receptor	CD124|IL-4RA|IL4RA	5884	0.28133	8.56802	2.31349	0.0297609	0.55238	-4.8489
chr4	2963571	3040760	+	ENSG00000125388.20	protein_coding	GRK4	2868	G protein-coupled receptor kinase 4	GPRK2L|GPRK4|GRK4a|IT11	4736	-0.832057	1.28564	-2.31241	0.0297634	0.55238	-3.64235
chr19	49580646	49591004	+	ENSG00000126460.11	protein_coding	PRRG2	5639	proline rich and Gla domain 2	PRGP2	1700	1.97919	-1.32079	2.31073	0.0298716	0.55238	-3.45319
chr9	133328776	133336188	-	ENSG00000148296.7	protein_coding	SURF6	6838	surfeit 6	RRP14	4414	0.246128	6.045	2.3103	0.0298989	0.55238	-4.70352
chr5	177301198	177303744	-	ENSG00000169228.14	protein_coding	RAB24	53917	RAB24, member RAS oncogene family	-	2065	0.414161	3.9901	2.31004	0.0299156	0.55238	-4.2799
chr15	74899992	74906883	-	ENSG00000178761.15	protein_coding	FAM219B	57184	family with sequence similarity 219 member B	C15orf17	5015	-0.217793	5.17768	-2.30908	0.0299775	0.55238	-4.56762
chr4	169392809	169612627	-	ENSG00000137601.17	protein_coding	NEK1	4750	NIMA related kinase 1	ALS24|NY-REN-55|SRPS2|SRPS2A|SRTD6	8354	0.373185	4.51864	2.30856	0.0300112	0.55238	-4.38319
chr1	210328252	210676296	+	ENSG00000054392.13	protein_coding	HHAT	55733	hedgehog acyltransferase	MART2|SKI1|Skn	6645	0.663117	2.06885	2.30843	0.0300191	0.55238	-3.77712
chr19	19516227	19536076	+	ENSG00000258674.5	protein_coding	AC011448.1	NA	NA	NA	1846	1.10407	0.777003	2.30733	0.0300905	0.55283	-3.5157
chr17	47837692	47841289	-	ENSG00000141295.14	protein_coding	SCRN2	90507	secernin 2	Ses2	2999	0.246241	5.85535	2.30255	0.0304006	0.555695	-4.69098
chr12	92140278	92145846	-	ENSG00000133639.6	protein_coding	BTG1	694	BTG anti-proliferation factor 1	APRO2	4855	0.235487	9.82258	2.30123	0.0304871	0.555695	-4.88372
chr19	17523301	17553839	+	ENSG00000167483.18	protein_coding	NIBAN3	199786	niban apoptosis regulator 3	BCNP1|FAM129C	6915	-0.953961	1.66154	-2.30109	0.0304961	0.555695	-3.6742
chr11	8019244	8106243	+	ENSG00000166402.9	protein_coding	TUB	7275	TUB bipartite transcription factor	RDOB|rd5	7004	-0.458517	3.86992	-2.29978	0.030582	0.555695	-4.26286
chr9	15422704	15465953	+	ENSG00000164975.15	protein_coding	SNAPC3	6619	small nuclear RNA activating complex polypeptide 3	PTFbeta|SNAP50	6684	0.342055	5.36312	2.29889	0.0306402	0.555695	-4.59586
chr7	5592816	5606655	+	ENSG00000075618.18	protein_coding	FSCN1	6624	fascin actin-bundling protein 1	FAN1|HSN|SNL|p55	3699	-1.6784	-0.435048	-2.29879	0.0306471	0.555695	-3.45638
chr11	9138825	9265350	-	ENSG00000184014.8	protein_coding	DENND5A	23258	DENN domain containing 5A	EIEE49|RAB6IP1	8608	-0.182949	8.00174	-2.29876	0.0306493	0.555695	-4.86335
chr1	40508741	40516556	+	ENSG00000164002.11	protein_coding	EXO5	64789	exonuclease 5	C1orf176|DEM1|Exo V|hExo5	3092	0.33836	3.65038	2.29854	0.0306636	0.555695	-4.23292
chr22	30262829	30266851	-	ENSG00000099985.4	protein_coding	OSM	5008	oncostatin M	-	2125	-1.28426	2.63097	-2.34446	0.0306704	0.555695	-3.82709
chr8	38176533	38213301	+	ENSG00000156735.11	protein_coding	BAG4	9530	BAG cochaperone 4	BAG-4|SODD	4809	-0.425535	3.73183	-2.29713	0.0307566	0.555899	-4.23122
chr4	184694085	184734130	-	ENSG00000151725.12	protein_coding	CENPU	79682	centromere protein U	CENP50|CENPU50|KLIP1|MLF1IP|PBIP1	3483	-0.892777	1.76746	-2.29644	0.0308018	0.555899	-3.74808
chr1	232397965	232630571	-	ENSG00000116991.11	protein_coding	SIPA1L2	57568	signal induced proliferation associated 1 like 2	SPAL2|SPAR2	8552	-1.38514	0.159924	-2.29612	0.030823	0.555899	-3.51704
chr18	22413599	22417915	-	ENSG00000212710.5	protein_coding	CTAGE1	64693	cutaneous T cell lymphoma-associated antigen 1	CT21.1|CT21.2|CTAGE|CTAGE-1|CTAGE-2	4317	-0.760012	1.48029	-2.2936	0.0309896	0.55805	-3.6727
chr11	93741591	93764749	+	ENSG00000182919.15	protein_coding	C11orf54	28970	chromosome 11 open reading frame 54	PTD012|PTOD012	6269	0.238665	5.13909	2.29002	0.0312287	0.561252	-4.57416
chr9	100099243	100302175	+	ENSG00000119509.13	protein_coding	INVS	27130	inversin	INV|NPH2|NPHP2	7131	0.284733	5.05639	2.28939	0.0312705	0.561252	-4.56272
chr2	28457145	28644142	+	ENSG00000163803.13	protein_coding	PLB1	151056	phospholipase B1	PLB|PLB/LIP	8603	1.49323	-0.28769	2.2888	0.0313102	0.561252	-3.46858
chr17	8474207	8630761	-	ENSG00000133026.13	protein_coding	MYH10	4628	myosin heavy chain 10	NMMHC-IIB|NMMHCB	9009	-0.338873	4.18945	-2.28778	0.0313783	0.561519	-4.37785
chr9	114611206	114646422	+	ENSG00000157693.15	protein_coding	TMEM268	203197	transmembrane protein 268	C9orf91	4792	0.338316	5.02116	2.28673	0.0314494	0.561519	-4.57285
chr20	59863564	59933655	-	ENSG00000196074.13	protein_coding	SYCP2	10388	synaptonemal complex protein 2	SCP-2|SCP2|SPGF1	6465	-0.549418	3.75081	-2.28807	0.0314679	0.561519	-4.2629
chr12	29412474	29497686	-	ENSG00000187950.8	protein_coding	OVCH1	341350	ovochymase 1	OVCH	3958	-2.32619	-1.26764	-2.28355	0.0316635	0.563777	-3.48738
chr3	127598410	127622436	+	ENSG00000073111.14	protein_coding	MCM2	4171	minichromosome maintenance complex component 2	BM28|CCNL1|CDCL1|D3S3194|DFNA70|MITOTIN|cdc19	4715	0.474617	3.4679	2.28316	0.0316901	0.563777	-4.17889
chr14	103928456	104052667	+	ENSG00000156414.19	protein_coding	TDRD9	122402	tudor domain containing 9	C14orf75|HIG-1|HLS|NET54|SPGF30|SPNE	5486	1.67952	-0.93305	2.28243	0.0317395	0.563806	-3.47826
chr1	161749758	161757238	+	ENSG00000081721.12	protein_coding	DUSP12	11266	dual specificity phosphatase 12	DUSP1|YVH1	1762	-0.263199	5.12162	-2.28041	0.0318773	0.564252	-4.59228
chr9	113444731	113597743	+	ENSG00000138835.22	protein_coding	RGS3	5998	regulator of G protein signaling 3	C2PA|RGP3	13793	0.533796	3.50896	2.28037	0.0318799	0.564252	-4.25677
chr4	1871393	1982207	+	ENSG00000109685.18	protein_coding	NSD2	7468	nuclear receptor binding SET domain protein 2	KMT3F|KMT3G|MMSET|REIIBP|TRX5|WHS|WHSC1	19807	-0.194602	6.61937	-2.27996	0.0319081	0.564252	-4.83334
chr11	117986370	118003037	+	ENSG00000110324.11	protein_coding	IL10RA	3587	interleukin 10 receptor subunit alpha	CD210|CD210a|CDW210A|HIL-10R|IL-10R1|IL10R	8080	0.295659	8.20079	2.28384	0.0319868	0.564797	-4.90407
chr2	105337532	105349211	+	ENSG00000135974.10	protein_coding	C2orf49	79074	chromosome 2 open reading frame 49	asw	4595	0.250379	5.43565	2.27553	0.0322112	0.56656	-4.65935
chr7	114922359	115019202	+	ENSG00000135272.12	protein_coding	MDFIC	29969	MyoD family inhibitor domain containing	HIC|MDFIC1	5047	-0.282442	6.93735	-2.27532	0.0322255	0.56656	-4.8548
chr19	16892951	17026815	-	ENSG00000160111.14	protein_coding	CPAMD8	27151	C3 and PZP like alpha-2-macroglobulin domain containing 8	ASGD8|K-CAP|VIP	10195	-1.62712	0.390985	-2.27826	0.0322964	0.56656	-3.54456
chr20	59025475	59032345	-	ENSG00000124172.10	protein_coding	ATP5F1E	514	ATP synthase F1 subunit epsilon	ATP5E|ATPE|MC5DN3	5081	0.244105	6.80097	2.27415	0.032306	0.56656	-4.8465
chr9	20658309	20995955	+	ENSG00000188352.12	protein_coding	FOCAD	54914	focadhesin	KIAA1797	10036	0.293601	4.85213	2.27385	0.0323268	0.56656	-4.56684
chr22	28794555	28800597	-	ENSG00000100219.16	protein_coding	XBP1	7494	X-box binding protein 1	TREB-5|TREB5|XBP-1|XBP2	3028	-0.559901	7.08719	-2.34211	0.0324103	0.567181	-4.79223
chr19	57435325	57447101	+	ENSG00000186230.7	protein_coding	ZNF749	388567	zinc finger protein 749	-	4637	-0.347194	3.876	-2.27125	0.0325066	0.568024	-4.32732
chr10	109864766	109923553	-	ENSG00000108039.18	protein_coding	XPNPEP1	7511	X-prolyl aminopeptidase 1	APP1|SAMP|XPNPEP|XPNPEPL|XPNPEPL1	6691	0.21227	5.73623	2.27042	0.0325644	0.568191	-4.74166
chr8	142657460	142681968	-	ENSG00000234616.9	protein_coding	JRK	8629	Jrk helix-turn-helix protein	JH8|jerky	11229	0.428275	5.86631	2.29589	0.0327216	0.570069	-4.74438
chr1	39491636	39529869	+	ENSG00000183682.8	protein_coding	BMP8A	353500	bone morphogenetic protein 8a	OP-2	5636	-0.733728	3.73573	-2.28009	0.0327687	0.570069	-4.1448
chr15	84600986	84627796	+	ENSG00000176371.14	protein_coding	ZSCAN2	54993	zinc finger and SCAN domain containing 2	ZFP29|ZNF854	4878	0.363763	3.5154	2.26429	0.0329926	0.573119	-4.24907
chr8	66432492	66468907	+	ENSG00000147576.17	protein_coding	ADHFE1	137872	alcohol dehydrogenase iron containing 1	ADH8|HMFT2263|HOT	3378	-0.534363	2.74825	-2.26358	0.0330429	0.573148	-4.0913
chr21	36135079	36146562	+	ENSG00000159231.6	protein_coding	CBR3	874	carbonyl reductase 3	HEL-S-25|SDR21C2|hCBR3	998	-0.88118	1.41608	-2.26083	0.0332372	0.573749	-3.74601
chr14	76786009	76826246	-	ENSG00000013523.11	protein_coding	ANGEL1	23357	angel homolog 1	Ccr4e|KIAA0759	6525	0.298371	5.84289	2.25981	0.0333093	0.573749	-4.77179
chr3	186546067	186570543	-	ENSG00000113838.13	protein_coding	TBCCD1	55171	TBCC domain containing 1	-	3398	0.283413	4.66868	2.25851	0.0334012	0.573749	-4.53453
chr20	33811348	33854366	+	ENSG00000101421.4	protein_coding	CHMP4B	128866	charged multivesicular body protein 4B	C20orf178|CHMP4A|CTPP3|CTRCT31|SNF7|SNF7-2|Shax1|VPS32B|Vps32-2|dJ553F4.4	1602	0.182262	6.4682	2.25841	0.0334084	0.573749	-4.8506
chr19	37554782	37594792	-	ENSG00000180479.14	protein_coding	ZNF571	51276	zinc finger protein 571	HSPC059	6208	0.525035	3.43244	2.25658	0.0335388	0.573749	-4.19331
chr12	53380176	53416446	+	ENSG00000185591.10	protein_coding	SP1	6667	Sp1 transcription factor	-	8083	0.242654	7.20427	2.25599	0.0335813	0.573749	-4.91601
chr3	44712643	44723831	+	ENSG00000196653.12	protein_coding	ZNF502	91392	zinc finger protein 502	-	3273	-0.579914	3.62574	-2.25566	0.0337167	0.573749	-4.26362
chr11	73974672	73983246	-	ENSG00000175567.10	protein_coding	UCP2	7351	uncoupling protein 2	BMIQ4|SLC25A8|UCPH	3171	0.344122	8.65495	2.27649	0.0337515	0.573749	-4.94282
chr9	92613183	92670131	-	ENSG00000127080.10	protein_coding	IPPK	64768	inositol-pentakisphosphate 2-kinase	C9orf12|INSP5K2|IP5K|IPK1|bA476B13.1	5033	-0.471023	2.70092	-2.25327	0.033776	0.573749	-4.08259
chr6	46129989	46146688	+	ENSG00000001561.7	protein_coding	ENPP4	22875	ectonucleotide pyrophosphatase/phosphodiesterase 4	NPP4	4644	0.465985	4.18729	2.25257	0.0338265	0.573749	-4.41559
chr4	141636583	141733987	+	ENSG00000164136.17	protein_coding	IL15	3600	interleukin 15	IL-15	7876	-1.07343	1.48553	-2.25177	0.0338836	0.573749	-3.73828
chr14	54396849	54420218	+	ENSG00000100526.20	protein_coding	CDKN3	1033	cyclin dependent kinase inhibitor 3	CDI1|CIP2|KAP|KAP1	1836	-1.16166	0.0143405	-2.25063	0.033966	0.573749	-3.57903
chr2	8678845	8684461	+	ENSG00000115738.10	protein_coding	ID2	3398	inhibitor of DNA binding 2	GIG8|ID2A|ID2H|bHLHb26	2213	0.608643	7.6379	2.32885	0.0339699	0.573749	-4.86434
chr20	13785007	13821580	+	ENSG00000101247.18	protein_coding	NDUFAF5	79133	NADH:ubiquinone oxidoreductase complex assembly factor 5	C20orf7|MC1DN16|bA526K24.2|dJ842G6.1	7158	-0.384384	4.86763	-2.24773	0.0341761	0.573749	-4.58
chr11	104942866	104969366	-	ENSG00000196954.14	protein_coding	CASP4	837	caspase 4	ICE(rel)II|ICEREL-II|ICH-2|Mih1|Mih1/TX|TX	6665	0.268634	6.79058	2.24662	0.0342567	0.573749	-4.90776
chr17	39063313	39154394	-	ENSG00000161381.14	protein_coding	PLXDC1	57125	plexin domain containing 1	TEM3|TEM7	9255	0.270056	7.7874	2.24639	0.0342735	0.573749	-4.96105
chr15	55180806	55197049	-	ENSG00000137876.10	protein_coding	RSL24D1	51187	ribosomal L24 domain containing 1	C15orf15|HRP-L30-iso|L30|RLP24|RPL24|RPL24L|TVAS3	2965	-0.27914	6.12855	-2.24625	0.0342837	0.573749	-4.81808
chr4	10074339	10116949	-	ENSG00000071127.17	protein_coding	WDR1	9948	WD repeat domain 1	AIP1|HEL-S-52|NORI-1|PFITS	7827	0.202303	8.63664	2.24606	0.0342971	0.573749	-4.98082
chr4	99070978	99088801	-	ENSG00000197894.11	protein_coding	ADH5	128	alcohol dehydrogenase 5 (class III), chi polypeptide	ADH-3|ADHX|FALDH|FDH|GSH-FDH|GSNOR|HEL-S-60p	4866	0.216019	6.15864	2.24594	0.0343064	0.573749	-4.83727
chr17	74862497	74873031	-	ENSG00000161513.12	protein_coding	FDXR	2232	ferredoxin reductase	ADR|ADXR|ANOA	3599	0.466056	2.99676	2.24537	0.0343477	0.573749	-4.15055
chr2	70295975	70302090	-	ENSG00000035141.8	protein_coding	FAM136A	84908	family with sequence similarity 136 member A	-	3086	-0.210218	5.8028	-2.24534	0.0343499	0.573749	-4.79324
chr18	80034389	80050651	+	ENSG00000101546.13	protein_coding	RBFA	79863	ribosome binding factor A	C18orf22|HsT169	7945	-0.264961	4.78579	-2.24461	0.0344029	0.573749	-4.61248
chr3	112463966	112499472	-	ENSG00000186265.10	protein_coding	BTLA	151888	B and T lymphocyte associated	BTLA1|CD272	3610	0.463755	4.82986	2.25545	0.0344081	0.573749	-4.58301
chr8	144502973	144507174	+	ENSG00000167701.14	protein_coding	GPT	2875	glutamic--pyruvic transaminase	AAT1|ALT1|GPT1	2756	0.527491	3.09764	2.24444	0.0344157	0.573749	-4.17026
chrX	13689128	13710504	+	ENSG00000123595.8	protein_coding	RAB9A	9367	RAB9A, member RAS oncogene family	RAB9	2113	-0.457555	3.69627	-2.24346	0.0344872	0.573749	-4.321
chr15	68190705	68206110	-	ENSG00000129007.14	protein_coding	CALML4	91860	calmodulin like 4	NY-BR-20	5038	1.65464	-1.06231	2.24334	0.0344962	0.573749	-3.53954
chr2	197453423	197475308	+	ENSG00000115520.8	protein_coding	COQ10B	80219	coenzyme Q10B	-	2722	-0.371281	4.69626	-2.24315	0.0345098	0.573749	-4.53339
chr9	3218297	3526004	-	ENSG00000080298.15	protein_coding	RFX3	5991	regulatory factor X3	-	11169	-0.368383	5.74592	-2.24922	0.0345233	0.573749	-4.76348
chr2	161424332	161985282	+	ENSG00000144290.17	protein_coding	SLC4A10	57282	solute carrier family 4 member 10	NBCn2|NCBE	7550	-1.53376	0.194608	-2.2428	0.0345357	0.573749	-3.5782
chr7	150400702	150412470	+	ENSG00000284691.1	protein_coding	AC073111.4	NA	NA	NA	4333	0.210122	6.35864	2.24131	0.0346446	0.573749	-4.87682
chr13	42040036	42256578	+	ENSG00000102780.17	protein_coding	DGKH	160851	diacylglycerol kinase eta	DGKeta	19742	-0.385709	6.10204	-2.2577	0.0346645	0.573749	-4.80902
chr16	2088708	2135898	-	ENSG00000008710.20	protein_coding	PKD1	5310	polycystin 1, transient receptor potential channel interacting	PBP|PC1|Pc-1|TRPP1	18534	0.192691	7.8559	2.24045	0.0347081	0.573749	-4.97073
chr9	104764129	104777764	+	ENSG00000165028.12	protein_coding	NIPSNAP3B	55335	nipsnap homolog 3B	FP944|NIPSNAP3|SNAP1	5630	0.91341	2.24049	2.23983	0.0347538	0.573749	-3.88183
chr3	51933429	51941904	-	ENSG00000114767.7	protein_coding	RRP9	9136	ribosomal RNA processing 9, U3 small nucleolar RNA binding protein	RNU3IP2|U3-55K	1542	-0.33591	4.36621	-2.23918	0.0348021	0.573749	-4.53446
chr5	151212150	151270440	+	ENSG00000196743.9	protein_coding	GM2A	2760	GM2 ganglioside activator	GM2-AP|SAP-3	4186	-0.451504	4.00448	-2.23885	0.0348264	0.573749	-4.45008
chr2	230203110	230313215	+	ENSG00000079263.19	protein_coding	SP140	11262	SP140 nuclear body protein	LYSP100|LYSP100-A|LYSP100-B	5582	0.372131	5.73251	2.24687	0.0348287	0.573749	-4.78004
chr2	70447284	70554193	-	ENSG00000163235.16	protein_coding	TGFA	7039	transforming growth factor alpha	TFGA	4917	-0.590926	2.68642	-2.23789	0.0348969	0.574071	-4.09212
chr20	64034344	64039962	+	ENSG00000196421.8	protein_coding	C20orf204	284739	chromosome 20 open reading frame 204	LINC00176|NCRNA00176|PRR17	5480	1.20311	2.01513	2.25039	0.035127	0.577051	-3.82417
chr14	24052009	24069729	+	ENSG00000186648.15	protein_coding	CARMIL3	90668	capping protein regulator and myosin 1 linker 3	C14orf121|LRRC16B|crml-1	6657	1.37234	0.0920652	2.23391	0.0351928	0.577132	-3.60294
chrX	154886349	154888061	+	ENSG00000277203.1	protein_coding	F8A1	8263	coagulation factor VIII associated 1	DXS522E|F8A|HAP40	1713	-0.640003	3.24247	-2.23938	0.0352458	0.577132	-4.26413
chr1	26472440	26476642	+	ENSG00000198830.11	protein_coding	HMGN2	3151	high mobility group nucleosomal binding domain 2	HMG17	3189	-0.288632	7.79066	-2.23561	0.0352787	0.577132	-4.9741
chr2	47695530	47810063	+	ENSG00000116062.17	protein_coding	MSH6	2956	mutS homolog 6	GTBP|GTMBP|HNPCC5|HSAP|p160	10955	0.219277	6.16899	2.23063	0.0354381	0.577334	-4.8754
chr9	120600811	120714470	-	ENSG00000106780.9	protein_coding	MEGF9	1955	multiple EGF like domains 9	EGFL5	6300	0.364228	5.37299	2.23354	0.0354393	0.577334	-4.75399
chr13	36949738	37000261	-	ENSG00000120697.9	protein_coding	ALG5	29880	ALG5 dolichyl-phosphate beta-glucosyltransferase	bA421P11.2	2231	-0.376107	4.24193	-2.23034	0.03546	0.577334	-4.46579
chr17	31316410	31321749	-	ENSG00000126860.12	protein_coding	EVI2A	2123	ecotropic viral integration site 2A	EVDA|EVI-2A|EVI2	3086	0.331584	5.8503	2.2318	0.0354869	0.577334	-4.82553
chr19	20776304	20809995	+	ENSG00000160229.13	protein_coding	ZNF66	7617	zinc finger protein 66	ZNF66P	5682	0.486697	3.17775	2.22834	0.0356102	0.578312	-4.22072
chr14	22971177	22982551	-	ENSG00000129474.16	protein_coding	AJUBA	84962	ajuba LIM protein	JUB	5885	0.844449	1.37042	2.22762	0.0356646	0.578312	-3.77789
chr2	60450520	60554467	-	ENSG00000119866.22	protein_coding	BCL11A	53335	BAF chromatin remodeling complex subunit BCL11A	BCL11A-L|BCL11A-S|BCL11A-XL|BCL11a-M|CTIP1|DILOS|EVI9|HBFQTL5|ZNF856	24514	-0.615012	2.25214	-2.22723	0.035694	0.578312	-3.98737
chr19	4324043	4342786	-	ENSG00000178078.12	protein_coding	STAP2	55620	signal transducing adaptor family member 2	BKS	2766	1.01451	1.49909	2.22541	0.0358313	0.579175	-3.75441
chr19	42198598	42220140	-	ENSG00000160570.14	protein_coding	DEDD2	162989	death effector domain containing 2	FLAME-3|FLAME3	2631	0.276864	6.14363	2.2248	0.0358782	0.579175	-4.88411
chr3	58332880	58426127	+	ENSG00000168297.16	protein_coding	PXK	54899	PX domain containing serine/threonine kinase like	MONAKA|SLOB	5355	0.285405	5.00568	2.2242	0.0359231	0.579175	-4.67363
chrX	21654690	21658330	-	ENSG00000185915.5	protein_coding	KLHL34	257240	kelch like family member 34	-	3641	0.862242	1.22203	2.22333	0.0359898	0.579175	-3.75523
chr2	102418689	102452565	+	ENSG00000115607.9	protein_coding	IL18RAP	8807	interleukin 18 receptor accessory protein	ACPL|CD218b|CDw218b|IL-18R-beta|IL-18RAcP|IL-18Rbeta|IL-1R-7|IL-1R7|IL-1RAcPL|IL18RB	2966	1.66718	0.0959688	2.22816	0.0359928	0.579175	-3.61787
chr22	50185915	50199598	+	ENSG00000170638.9	protein_coding	TRABD	80305	TraB domain containing	LP6054|PP2447	3153	-0.214067	7.94619	-2.22226	0.0360711	0.579362	-5.00702
chr17	48548870	48604912	-	ENSG00000120093.11	protein_coding	HOXB3	3213	homeobox B3	HOX2|HOX2G|Hox-2.7	7456	0.406323	4.56173	2.2215	0.0361291	0.579362	-4.56191
chr20	3162617	3173592	-	ENSG00000088899.15	protein_coding	LZTS3	9762	leucine zipper tumor suppressor family member 3	PROSAPIP1	5395	-0.339242	4.60342	-2.2212	0.0361518	0.579362	-4.60239
chr12	71686082	71705047	+	ENSG00000139291.14	protein_coding	TMEM19	55266	transmembrane protein 19	-	6494	0.304673	4.47244	2.21959	0.0362747	0.579656	-4.55408
chr7	100352176	100367733	+	ENSG00000121716.20	protein_coding	PILRB	29990	paired immunoglobin like type 2 receptor beta	FDFACT1|FDFACT2	5764	-0.728806	4.50518	-2.27418	0.0362994	0.579656	-4.52595
chr10	71816298	71851325	-	ENSG00000197746.14	protein_coding	PSAP	5660	prosaposin	GLBA|SAP1|SAP2	3189	0.170281	8.10086	2.21903	0.0363176	0.579656	-5.01997
chr6	83193357	83198935	+	ENSG00000013392.8	protein_coding	RWDD2A	112611	RWD domain containing 2A	RWDD2|dJ747H23.2	3769	-0.378334	3.83758	-2.2174	0.036443	0.580871	-4.42383
chr5	132692628	132737638	-	ENSG00000131437.15	protein_coding	KIF3A	11127	kinesin family member 3A	FLA10|KLP-20	6860	0.316808	4.6772	2.2163	0.0365277	0.581436	-4.61838
chr19	19192229	19201869	+	ENSG00000064490.14	protein_coding	RFXANK	8625	regulatory factor X associated ankyrin containing protein	ANKRA1|BLS|F14150_1|RFX-B	2503	-0.269191	5.12729	-2.21256	0.0368171	0.585193	-4.74665
chr2	101007617	101252866	-	ENSG00000204634.12	protein_coding	TBC1D8	11138	TBC1 domain family member 8	AD3|GRAMD8|HBLP1|TBC1D8A|VRP	6030	-0.590811	2.3065	-2.21197	0.036863	0.585193	-4.05884
chr10	93893973	93956062	+	ENSG00000176273.15	protein_coding	SLC35G1	159371	solute carrier family 35 member G1	C10orf60|POST|TMEM20	6829	-0.568286	3.72414	-2.21452	0.0371217	0.587799	-4.40438
chr3	66133610	66388116	+	ENSG00000144741.17	protein_coding	SLC25A26	115286	solute carrier family 25 member 26	COXPD28|SAMC	5850	-0.307459	4.55474	-2.20859	0.0371268	0.587799	-4.61001
chr13	95019835	95301475	-	ENSG00000125257.16	protein_coding	ABCC4	10257	ATP binding cassette subfamily C member 4	MOAT-B|MOATB|MRP4	8629	-0.497857	3.79417	-2.20772	0.0371951	0.5878	-4.41964
chrM	4470	5511	+	ENSG00000198763.3	protein_coding	MT-ND2	NA	NA	NA	1042	-0.3571	11.6049	-2.23686	0.0372265	0.5878	-5.04112
chr17	15944917	15975746	+	ENSG00000170425.3	protein_coding	ADORA2B	136	adenosine A2b receptor	ADORA2	2551	2.01458	-0.141947	2.22977	0.0374691	0.590839	-3.63596
chr5	115828200	115841837	-	ENSG00000145782.13	protein_coding	ATG12	9140	autophagy related 12	APG12|APG12L|FBR93|HAPG12	8867	0.236849	6.16505	2.20251	0.0376054	0.591777	-4.91986
chr19	57466663	57477570	-	ENSG00000197128.11	protein_coding	ZNF772	400720	zinc finger protein 772	-	6096	0.901749	3.10419	2.23095	0.0376289	0.591777	-4.18251
chr6	36196744	36232790	+	ENSG00000096070.19	protein_coding	BRPF3	27154	bromodomain and PHD finger containing 3	-	6613	0.229804	6.36863	2.20107	0.03772	0.592336	-4.96082
chr3	68975217	69013684	-	ENSG00000163378.14	protein_coding	EOGT	285203	EGF domain specific O-linked N-acetylglucosamine transferase	AER61|AOS4|C3orf64|EOGT1	5365	-0.373801	3.70257	-2.2005	0.0377649	0.592336	-4.40902
chr17	35092208	35121522	-	ENSG00000185379.20	protein_coding	RAD51D	5892	RAD51 paralog D	BROVCA4|R51H3|RAD51L3|TRAD	11304	0.227603	5.15371	2.19885	0.0378958	0.592895	-4.7524
chr22	20999104	21002196	-	ENSG00000184436.12	protein_coding	THAP7	80764	THAP domain containing 7	-	2879	-0.259373	5.48049	-2.19879	0.037901	0.592895	-4.82152
chr6	125956770	125980244	+	ENSG00000111911.7	protein_coding	HINT3	135114	histidine triad nucleotide binding protein 3	HINT4	3325	0.326779	4.58278	2.19789	0.0379727	0.593229	-4.60132
chr16	10743786	10769351	+	ENSG00000103274.11	protein_coding	NUBP1	4682	nucleotide binding protein 1	CIAO5|NBP|NBP1|NBP35	1955	0.435667	3.65395	2.19607	0.0381181	0.593664	-4.40468
chr12	48829756	48852842	-	ENSG00000174243.10	protein_coding	DDX23	9416	DEAD-box helicase 23	PRPF28|SNRNP100|U5-100K|U5-100KD|prp28	5427	0.181224	7.46936	2.19539	0.0381731	0.593664	-5.04382
chr19	53159213	53193386	-	ENSG00000197497.11	protein_coding	ZNF665	79788	zinc finger protein 665	ZFP160L	7601	0.575321	2.80343	2.19455	0.0382406	0.593664	-4.16823
chr9	121338987	121370304	-	ENSG00000148175.13	protein_coding	STOM	2040	stomatin	BND7|EPB7|EPB72	3199	0.640884	3.43224	2.20684	0.0382863	0.593664	-4.38277
chr20	33358839	33401561	-	ENSG00000101391.21	protein_coding	CDK5RAP1	51654	CDK5 regulatory subunit associated protein 1	C20orf34|C42|CGI-05|HSPC167	4567	-0.269815	6.28753	-2.1935	0.0383246	0.593664	-4.95388
chr14	104753147	104768494	+	ENSG00000184990.13	protein_coding	SIVA1	10572	SIVA1 apoptosis inducing factor	CD27BP|SIVA|Siva-1|Siva-2	4729	-0.256671	6.42571	-2.19287	0.0383757	0.593664	-4.96882
chr3	196988621	197029817	-	ENSG00000163975.12	protein_coding	MELTF	4241	melanotransferrin	CD228|MAP97|MFI2|MTF1|MTf	8394	1.14835	0.270536	2.19245	0.0384097	0.593664	-3.69376
chr9	35812960	35815354	-	ENSG00000137133.11	protein_coding	HINT2	84681	histidine triad nucleotide binding protein 2	HIT-17	2395	0.687011	2.28639	2.19179	0.0384627	0.593664	-4.07321
chr10	48684876	48982956	+	ENSG00000128815.19	protein_coding	WDFY4	57705	WDFY family member 4	C10orf64	13678	-0.878771	1.83793	-2.19112	0.0385173	0.593664	-3.97492
chr10	13317428	13348298	-	ENSG00000086475.15	protein_coding	SEPHS1	22929	selenophosphate synthetase 1	SELD|SPS|SPS1	3884	0.21848	5.3532	2.19077	0.0385451	0.593664	-4.82564
chr10	3066333	3137718	+	ENSG00000067057.17	protein_coding	PFKP	5214	phosphofructokinase, platelet	ATP-PFK|PFK-C|PFK-P|PFKF	5554	-0.326971	5.80286	-2.19281	0.0385542	0.593664	-4.90344
chr5	80654652	80876815	+	ENSG00000113318.11	protein_coding	MSH3	4437	mutS homolog 3	DUP|FAP4|MRP1	5329	-0.435586	4.10749	-2.18922	0.0386708	0.594683	-4.53213
chr12	4269771	4305353	+	ENSG00000118971.9	protein_coding	CCND2	894	cyclin D2	KIAK0002|MPPH3	7988	-0.305767	6.76813	-2.19273	0.0387619	0.595307	-5.00669
chr12	6786858	6820799	+	ENSG00000010610.10	protein_coding	CD4	920	CD4 molecule	CD4mut	4557	0.228774	8.92492	2.18668	0.038878	0.595497	-5.09751
chr15	80779343	80951776	+	ENSG00000103888.17	protein_coding	CEMIP	57214	cell migration inducing hyaluronidase 1	CCSP1|HYBID|KIAA1199|TMEM2L	7621	0.528257	2.92445	2.18583	0.038947	0.595497	-4.25301
chr11	118998138	119015793	+	ENSG00000186166.9	protein_coding	CCDC84	NA	NA	NA	5111	-0.281631	6.47292	-2.18571	0.0389574	0.595497	-4.98696
chr20	35542038	35557634	+	ENSG00000125991.20	protein_coding	ERGIC3	51614	ERGIC and golgi 3	C20orf47|C2orf47|CGI-54|Erv46|NY-BR-84|PRO0989|SDBCAG84|dJ477O4.2	5995	0.181615	7.00938	2.18547	0.0389768	0.595497	-5.03548
chr10	133420666	133424572	-	ENSG00000203772.7	protein_coding	SPRN	503542	shadow of prion protein	SHADOO|SHO|bA108K14.1	3128	1.15639	0.154656	2.18486	0.0390266	0.595497	-3.68727
chr19	8308768	8321375	-	ENSG00000267855.6	protein_coding	NDUFA7	4701	NADH:ubiquinone oxidoreductase subunit A7	B14.5a|CI-B14.5a	1392	0.752605	1.27709	2.18387	0.0391075	0.595959	-3.79272
chr19	45692666	45703989	+	ENSG00000011478.12	protein_coding	QPCTL	54814	glutaminyl-peptide cyclotransferase like	gQC	2213	-0.389643	2.98161	-2.18137	0.039313	0.598287	-4.30313
chr1	147175351	147243050	-	ENSG00000131781.13	protein_coding	FMO5	2330	flavin containing dimethylaniline monoxygenase 5	hBVMO1	5984	0.711125	1.76693	2.18029	0.0394022	0.598287	-3.92115
chr14	52314305	52328598	+	ENSG00000125384.7	protein_coding	PTGER2	5732	prostaglandin E receptor 2	EP2	2465	-0.660598	4.46968	-2.22387	0.0394124	0.598287	-4.61173
chr14	51826195	51979342	+	ENSG00000186469.8	protein_coding	GNG2	54331	G protein subunit gamma 2	-	6379	0.212626	7.22023	2.17856	0.0395456	0.599361	-5.06079
chr6	63635802	63779336	+	ENSG00000118482.12	protein_coding	PHF3	23469	PHD finger protein 3	-	20926	-0.240623	7.78616	-2.1772	0.0396585	0.599361	-5.08669
chr11	34853094	34916379	-	ENSG00000149089.13	protein_coding	APIP	51074	APAF1 interacting protein	APIP2|CGI-29|CGI29|MMRP19|hAPIP	5217	-0.386237	4.35543	-2.17707	0.0396687	0.599361	-4.62338
chr14	50312324	50335558	+	ENSG00000125375.16	protein_coding	DMAC2L	27109	distal membrane arm assembly complex 2 like	ATP5S|ATPW|FB|HSU79253	4564	-0.31924	4.74295	-2.17686	0.0396864	0.599361	-4.72395
chr6	52497408	52577060	-	ENSG00000065308.5	protein_coding	TRAM2	9697	translocation associated membrane protein 2	-	7047	-0.267895	5.49867	-2.17613	0.0397475	0.599517	-4.89024
chr10	103446786	103452402	-	ENSG00000138172.11	protein_coding	CALHM2	51063	calcium homeostasis modulator family member 2	FAM26B	3108	0.703499	2.49784	2.1766	0.039897	0.599555	-4.22408
chr1	54225432	54413479	-	ENSG00000157216.15	protein_coding	SSBP3	23648	single stranded DNA binding protein 3	CSDP|SSDP|SSDP1	5227	0.243639	6.21755	2.1741	0.0399162	0.599555	-4.98823
chr19	40717112	40740860	+	ENSG00000086544.3	protein_coding	ITPKC	80271	inositol-trisphosphate 3-kinase C	IP3-3KC|IP3KC	3376	0.476678	3.4913	2.1739	0.0399333	0.599555	-4.40725
chr17	62627670	62693597	+	ENSG00000011028.14	protein_coding	MRC2	9902	mannose receptor C type 2	CD280|CLEC13E|ENDO180|UPARAP	6591	-0.864298	3.18182	-2.20741	0.0399534	0.599555	-4.29746
chr17	16029157	16218185	-	ENSG00000141027.21	protein_coding	NCOR1	9611	nuclear receptor corepressor 1	N-CoR|N-CoR1|PPP1R109|TRAC1|hN-CoR	15404	0.230252	7.49768	2.17128	0.0401527	0.60005	-5.09267
chr6	10694972	10709782	+	ENSG00000111845.5	protein_coding	PAK1IP1	55003	PAK1 interacting protein 1	MAK11|PIP1|WDR84|bA421M1.5|hPIP1	1523	-0.434434	3.65016	-2.17109	0.0401688	0.60005	-4.44956
chr1	167529117	167553805	-	ENSG00000143162.9	protein_coding	CREG1	8804	cellular repressor of E1A stimulated genes 1	CREG	3286	-0.373846	4.32339	-2.17102	0.0401748	0.60005	-4.5935
chr19	18153163	18170532	+	ENSG00000105647.19	protein_coding	PIK3R2	5296	phosphoinositide-3-kinase regulatory subunit 2	MPPH|MPPH1|P85B|p85|p85-BETA	5163	1.15018	0.021803	2.17084	0.0401899	0.60005	-3.65538
chr1	203305491	203309602	+	ENSG00000159388.6	protein_coding	BTG2	7832	BTG anti-proliferation factor 2	APRO1|PC3|TIS21	2757	-0.695985	8.49635	-2.24945	0.0402589	0.600128	-5.02712
chr17	48575507	48578350	-	ENSG00000182742.6	protein_coding	HOXB4	3214	homeobox B4	HOX-2.6|HOX2|HOX2F	2002	0.670182	2.18278	2.16932	0.0403179	0.600128	-3.98323
chr19	43460787	43465608	-	ENSG00000124466.9	protein_coding	LYPD3	27076	LY6/PLAUR domain containing 3	C4.4A	2467	-0.744175	2.49261	-2.16896	0.0403477	0.600128	-4.11982
chr20	56412112	56460387	+	ENSG00000087589.16	protein_coding	CASS4	57091	Cas scaffold protein family member 4	C20orf32|CAS4|HEFL|HEPL	5069	0.43163	4.42773	2.17012	0.0404207	0.600455	-4.66964
chr3	120684938	120742993	-	ENSG00000144840.10	protein_coding	RABL3	285282	RAB, member of RAS oncogene family like 3	PNCA5	6427	-0.257663	5.22244	-2.16712	0.0405035	0.600929	-4.82854
chr5	32531633	32604079	+	ENSG00000113387.12	protein_coding	SUB1	10923	SUB1 regulator of transcription	P15|PC4|p14	9266	-0.276565	7.20891	-2.16525	0.040662	0.601894	-5.07419
chr9	133532164	133575519	+	ENSG00000197859.11	protein_coding	ADAMTSL2	9719	ADAMTS like 2	ADAMTSL-2|GPHYSD1	4677	0.897678	1.96921	2.16469	0.0407096	0.601894	-4.01196
chr2	99318982	99340702	-	ENSG00000115514.12	protein_coding	TXNDC9	10190	thioredoxin domain containing 9	APACD|PHLP3	2816	0.422068	3.85808	2.16455	0.0407216	0.601894	-4.49294
chrM	10059	10404	+	ENSG00000198840.2	protein_coding	MT-ND3	NA	NA	NA	346	-0.433138	9.71694	-2.21192	0.0409108	0.603933	-5.09647
chr7	5898725	5926550	+	ENSG00000122674.12	protein_coding	CCZ1	51622	CCZ1 homolog, vacuolar protein trafficking and biogenesis associated	C7orf28A|CCZ1A|CGI-43|H_DJ1163J12.2	6431	-0.457708	3.40793	-2.16068	0.0410523	0.604792	-4.37809
chr8	89757806	89791064	+	ENSG00000104312.8	protein_coding	RIPK2	8767	receptor interacting serine/threonine kinase 2	CARD3|CARDIAK|CCK|GIG30|RICK|RIP2	3059	0.464408	3.71182	2.16045	0.0410715	0.604792	-4.46779
chr12	121918592	122003927	+	ENSG00000158023.10	protein_coding	CFAP251	144406	cilia and flagella associated protein 251	CaM-IP4|SPGF33|WDR66	15385	-1.1926	-0.181381	-2.15896	0.0411995	0.605231	-3.69072
chr4	6575189	6623362	+	ENSG00000013288.9	protein_coding	MAN2B2	23324	mannosidase alpha class 2B member 2	-	8884	-0.174975	7.04051	-2.15891	0.0412039	0.605231	-5.09161
chr15	63504511	63594640	+	ENSG00000140455.17	protein_coding	USP3	9960	ubiquitin specific peptidase 3	SIH003|UBP	7764	-0.284369	6.78179	-2.15835	0.0412975	0.605851	-5.06424
chr2	203936763	203961577	+	ENSG00000163600.13	protein_coding	ICOS	29851	inducible T cell costimulator	AILIM|CD278|CVID1	2630	-0.306771	6.61467	-2.15951	0.041496	0.608006	-5.0443
chr5	98853985	98929007	-	ENSG00000153922.11	protein_coding	CHD1	1105	chromodomain helicase DNA binding protein 1	CHD-1|PILBOS	10487	-0.232412	7.97455	-2.15465	0.041572	0.608243	-5.13461
chr5	154445997	154461053	+	ENSG00000164576.12	protein_coding	SAP30L	79685	SAP30 like	NS4ATP2	6714	0.223381	6.02529	2.15374	0.0416504	0.608243	-5.00131
chr1	27970344	28088637	-	ENSG00000158161.16	protein_coding	EYA3	2140	EYA transcriptional coactivator and phosphatase 3	-	6424	-0.292955	5.17222	-2.15312	0.0417049	0.608243	-4.85538
chr5	62306162	62391025	+	ENSG00000068796.19	protein_coding	KIF2A	3796	kinesin family member 2A	CDCBM3|HK2|KIF2	13050	-0.25313	7.88183	-2.1526	0.0417495	0.608243	-5.13575
chr17	7306999	7312463	+	ENSG00000132507.18	protein_coding	EIF5A	1984	eukaryotic translation initiation factor 5A	EIF-5A|EIF5A1|eIF-4D|eIF5AI	2685	-0.281193	7.19507	-2.15281	0.0418793	0.608243	-5.10149
chr1	204218853	204377665	-	ENSG00000143850.16	protein_coding	PLEKHA6	22874	pleckstrin homology domain containing A6	PEPP-3|PEPP3	9656	1.3903	0.0294928	2.15111	0.0418798	0.608243	-3.70729
chr7	5879827	5886363	+	ENSG00000122543.11	protein_coding	OCM	654231	oncomodulin	OCM1|OM|ONCM	833	-0.942446	1.40805	-2.15073	0.0419133	0.608243	-3.91534
chr7	142855061	142871094	+	ENSG00000106123.12	protein_coding	EPHB6	2051	EPH receptor B6	HEP	5325	0.354885	3.40034	2.15051	0.0419322	0.608243	-4.43457
chr8	60678740	60868028	+	ENSG00000171316.12	protein_coding	CHD7	55636	chromodomain helicase DNA binding protein 7	CRG|HH5|IS3|KAL5	17020	-0.285451	7.35777	-2.15336	0.0419763	0.608243	-5.1149
chr20	18587942	18766644	+	ENSG00000125821.13	protein_coding	DTD1	92675	D-aminoacyl-tRNA deacylase 1	C20orf88|DTD|DUE-B|DUEB|HARS2|pqn-68	6416	-0.380775	3.32008	-2.14938	0.0420313	0.608293	-4.42835
chr12	56118250	56144674	+	ENSG00000139641.13	protein_coding	ESYT1	23344	extended synaptotagmin 1	FAM62A|MBC2	5285	0.228098	8.35252	2.14549	0.0423729	0.610941	-5.16639
chr8	23528956	23575463	+	ENSG00000147454.14	protein_coding	SLC25A37	51312	solute carrier family 25 member 37	HT015|MFRN|MFRN1|MSC|MSCP|PRO1278|PRO1584|PRO2217	7996	-0.174335	6.6156	-2.14542	0.0423786	0.610941	-5.08262
chr13	21671073	21704498	+	ENSG00000102678.7	protein_coding	FGF9	2254	fibroblast growth factor 9	FGF-9|GAF|HBFG-9|HBGF-9|SYNS3	4849	-1.16063	0.214045	-2.14439	0.0424695	0.610941	-3.7952
chr19	544034	549924	+	ENSG00000197540.8	protein_coding	GZMM	3004	granzyme M	LMET1|MET1	945	0.252135	6.23474	2.14387	0.0425156	0.610941	-5.04426
chr17	34980512	35009743	+	ENSG00000005156.12	protein_coding	LIG3	3980	DNA ligase 3	LIG2|LIG3alpha	12901	0.223641	5.62378	2.14386	0.0425167	0.610941	-4.96247
chr19	12995608	13098796	+	ENSG00000008441.17	protein_coding	NFIX	4784	nuclear factor I X	CTF|MRSHSS|NF-I/X|NF1-X|NF1A|SOTOS2	6302	-0.489926	3.50388	-2.14341	0.042556	0.610941	-4.47616
chr17	78130770	78142968	+	ENSG00000167895.15	protein_coding	TMC8	147138	transmembrane channel like 8	EV2|EVER2|EVIN2	5459	0.282313	10.73	2.14996	0.0425979	0.610941	-5.18377
chr2	240605430	240631259	+	ENSG00000178623.12	protein_coding	GPR35	2859	G protein-coupled receptor 35	-	5090	0.516789	3.57159	2.14259	0.0426286	0.610941	-4.48741
chr19	49453225	49471050	+	ENSG00000161618.10	protein_coding	ALDH16A1	126133	aldehyde dehydrogenase 16 family member A1	-	4589	-0.254553	6.02151	-2.14137	0.0427373	0.611128	-5.01604
chr5	69093949	69131069	+	ENSG00000145740.19	protein_coding	SLC30A5	64924	solute carrier family 30 member 5	ZNT5|ZNTL1|ZTL1|ZnT-5	5481	0.225349	5.55529	2.14024	0.0428377	0.611128	-4.92956
chr9	137306896	137423211	-	ENSG00000187609.16	protein_coding	EXD3	54932	exonuclease 3'-5' domain containing 3	Nbr|mut-7	7575	0.360492	4.76735	2.14023	0.0428391	0.611128	-4.77584
chr12	113185526	113192368	+	ENSG00000139405.16	protein_coding	RITA1	84934	RBPJ interacting and tubulin associated 1	C12orf52|RITA	2309	0.539457	3.69648	2.14338	0.0428766	0.611128	-4.52885
chr11	47617315	47642607	-	ENSG00000109919.10	protein_coding	MTCH2	23788	mitochondrial carrier 2	HSPC032|MIMP|SLC25A50	2881	0.290575	4.43411	2.13881	0.0429653	0.611128	-4.72905
chr7	10931943	10940153	-	ENSG00000189043.10	protein_coding	NDUFA4	4697	NDUFA4 mitochondrial complex associated	CI-9k|CI-MLRQ|COXFA4|MLRQ	3461	-0.272742	5.5381	-2.13828	0.0430125	0.611128	-4.91567
chr14	73958010	74019399	-	ENSG00000187097.12	protein_coding	ENTPD5	957	ectonucleoside triphosphate diphosphohydrolase 5 (inactive)	CD39L4|NTPDase-5|PCPH	10379	0.303062	4.91696	2.13826	0.0430141	0.611128	-4.81757
chr9	111525159	111577844	+	ENSG00000173258.13	protein_coding	ZNF483	158399	zinc finger protein 483	ZKSCAN16|ZSCAN48	16723	-0.407941	4.531	-2.13769	0.0430655	0.611128	-4.71253
chr8	141117278	141195808	+	ENSG00000105339.10	protein_coding	DENND3	22898	DENN domain containing 3	-	14670	0.465647	3.77039	2.13721	0.0431079	0.611128	-4.53789
chr2	38751534	38785002	+	ENSG00000152147.11	protein_coding	GEMIN6	79833	gem nuclear organelle associated protein 6	-	4363	0.561461	2.73401	2.13598	0.0432185	0.61173	-4.26713
chr21	45643694	45942454	+	ENSG00000183570.16	protein_coding	PCBP3	54039	poly(rC) binding protein 3	ALPHA-CP3|PCBP3-OT1|PCBP3OT	6828	0.622398	2.58549	2.13558	0.0432541	0.61173	-4.27036
chr17	40058290	40093867	+	ENSG00000126351.13	protein_coding	THRA	7067	thyroid hormone receptor alpha	AR7|CHNG6|EAR7|ERB-T-1|ERBA|ERBA1|NR1A1|THRA1|THRA2|c-ERBA-1	7334	0.280487	6.70426	2.13556	0.0433293	0.611972	-5.11258
chr2	219279342	219286898	+	ENSG00000135924.16	protein_coding	DNAJB2	3300	DnaJ heat shock protein family (Hsp40) member B2	CMT2T|DSMA5|HSJ-1|HSJ1|HSPF3	5809	0.263643	6.21328	2.13347	0.0434447	0.611972	-5.05744
chr8	38263130	38269243	-	ENSG00000147535.17	protein_coding	PLPP5	84513	phospholipid phosphatase 5	DPPL1|HTPAP|PPAPDC1B	4102	-0.293012	4.91662	-2.13267	0.0435169	0.611972	-4.84168
chr19	36182276	36246257	-	ENSG00000196357.12	protein_coding	ZNF565	147929	zinc finger protein 565	-	3737	0.588997	2.823	2.13244	0.0435373	0.611972	-4.23642
chr13	52455429	52476628	+	ENSG00000136108.15	protein_coding	CKAP2	26586	cytoskeleton associated protein 2	LB1|TMAP|se20-10	4547	-0.466527	4.27684	-2.13244	0.0435606	0.611972	-4.62602
chr8	23270120	23296279	+	ENSG00000104679.11	protein_coding	R3HCC1	203069	R3H domain and coiled-coil containing 1	-	2630	0.275156	4.87727	2.13078	0.0436877	0.611972	-4.82114
chr1	161046946	161069970	-	ENSG00000186517.14	protein_coding	ARHGAP30	257106	Rho GTPase activating protein 30	-	5064	0.193489	9.28411	2.12972	0.0437836	0.611972	-5.20715
chrX	130623369	130903317	-	ENSG00000165675.16	protein_coding	ENOX2	10495	ecto-NOX disulfide-thiol exchanger 2	APK1|COVA1|tNOX	4279	0.321435	4.47585	2.12934	0.0438181	0.611972	-4.71321
chr13	40555667	40666641	-	ENSG00000150907.10	protein_coding	FOXO1	2308	forkhead box O1	FKH1|FKHR|FOXO1A	5957	-0.233326	7.47264	-2.12899	0.0438505	0.611972	-5.16137
chr2	38981549	39124345	-	ENSG00000115904.13	protein_coding	SOS1	6654	SOS Ras/Rac guanine nucleotide exchange factor 1	GF1|GGF1|GINGF|HGF|NS4|SOS-1	9061	0.196421	7.02363	2.12583	0.0441382	0.611972	-5.14626
chr22	38734725	38794143	-	ENSG00000100242.15	protein_coding	SUN2	25777	Sad1 and UNC84 domain containing 2	UNC84B	6489	0.189138	9.93137	2.12437	0.044272	0.611972	-5.22172
chrX	101622797	101627843	+	ENSG00000102401.20	protein_coding	ARMCX3	51566	armadillo repeat containing X-linked 3	ALEX3|GASP6|dJ545K15.2	4239	0.255788	4.95496	2.12367	0.0443361	0.611972	-4.85304
chr19	2100988	2164468	-	ENSG00000065000.19	protein_coding	AP3D1	8943	adaptor related protein complex 3 subunit delta 1	ADTD|HPS10|hBLVR	8613	0.167731	7.63825	2.12281	0.0444157	0.611972	-5.18524
chrX	150568621	150673143	+	ENSG00000171100.15	protein_coding	MTM1	4534	myotubularin 1	CNM|MTMX|XLMTM	3835	-0.303935	5.12447	-2.1228	0.0444163	0.611972	-4.88649
chr9	33921693	34048949	-	ENSG00000137073.23	protein_coding	UBAP2	55833	ubiquitin associated protein 2	UBAP-2	10620	-0.208449	5.44865	-2.12274	0.0444215	0.611972	-4.98007
chr15	63276018	63309126	+	ENSG00000138613.14	protein_coding	APH1B	83464	aph-1 homolog B, gamma-secretase subunit	APH-1B|PRO1328|PSFL|TAAV688	5443	-0.357678	4.77175	-2.12259	0.0444355	0.611972	-4.81739
chr7	140672945	140696261	+	ENSG00000133597.11	protein_coding	ADCK2	90956	aarF domain containing kinase 2	AARF	3110	0.312298	4.56548	2.12245	0.0444481	0.611972	-4.75721
chr12	10699089	10723323	-	ENSG00000060138.13	protein_coding	YBX3	8531	Y-box binding protein 3	CSDA|CSDA1|DBPA|ZONAB	8621	-1.13505	4.10412	-2.19347	0.0444713	0.611972	-4.53254
chr19	52153864	52171643	-	ENSG00000196267.12	protein_coding	ZNF836	162962	zinc finger protein 836	-	4244	0.314805	4.29133	2.12175	0.044513	0.611972	-4.68701
chr6	104728094	104859919	-	ENSG00000085382.12	protein_coding	HACE1	57531	HECT domain and ankyrin repeat containing E3 ubiquitin protein ligase 1	SPPRS	9237	-0.254558	4.70698	-2.12171	0.0445167	0.611972	-4.80995
chr14	104681146	104722535	+	ENSG00000203485.14	protein_coding	INF2	64423	inverted formin 2	C14orf151|C14orf173|CMTDIE|FSGS5|pp9484	13627	-0.625203	7.37133	-2.19211	0.044527	0.611972	-5.07879
chr3	53884417	53891962	-	ENSG00000113811.11	protein_coding	SELENOK	58515	selenoprotein K	HSPC030|HSPC297|SELK	2132	-0.504659	4.96758	-2.14571	0.0445336	0.611972	-4.8122
chr11	6448613	6474459	-	ENSG00000110171.20	protein_coding	TRIM3	10612	tripartite motif containing 3	BERP|HAC1|RNF22|RNF97	6751	-0.308398	4.55925	-2.121	0.0445819	0.611972	-4.79555
chr16	84271	138677	-	ENSG00000103148.17	protein_coding	NPRL3	8131	NPR3 like, GATOR1 complex subunit	C16orf35|CGTHBA|FFEVF3|HS-40|MARE|NPR3|RMD11	6426	-0.252031	5.55267	-2.12034	0.0446428	0.611972	-4.98893
chr2	8852690	9003709	-	ENSG00000143797.12	protein_coding	MBOAT2	129642	membrane bound O-acyltransferase domain containing 2	LPAAT|LPCAT4|LPEAT|LPLAT 2|OACT2	8694	0.740426	1.95269	2.12013	0.0446623	0.611972	-4.10994
chr9	15163622	15307360	-	ENSG00000155158.20	protein_coding	TTC39B	158219	tetratricopeptide repeat domain 39B	C9orf52	12208	-0.323352	7.86765	-2.13606	0.044711	0.611972	-5.17212
chr19	1026586	1039068	+	ENSG00000064666.15	protein_coding	CNN2	1265	calponin 2	-	3640	-0.22939	8.55859	-2.11954	0.0447174	0.611972	-5.21782
chr19	1446302	1473244	+	ENSG00000115266.12	protein_coding	APC2	10297	APC regulator of WNT signaling pathway 2	APCL	12635	0.593672	1.93235	2.11933	0.0447369	0.611972	-4.07726
chr12	95076749	95217482	-	ENSG00000180263.14	protein_coding	FGD6	55785	FYVE, RhoGEF and PH domain containing 6	ZFYVE24	10044	-0.74767	1.64553	-2.11871	0.044794	0.611972	-4.02638
chr5	178113532	178126081	+	ENSG00000145911.6	protein_coding	N4BP3	23138	NEDD4 binding protein 3	LZTS4	5985	0.57441	2.46032	2.11819	0.0448418	0.611972	-4.26368
chr18	45687025	45752520	+	ENSG00000141469.18	protein_coding	SLC14A1	6563	solute carrier family 14 member 1 (Kidd blood group)	HUT11|HsT1341|JK|Jk(b)|RACH1|RACH2|UT-B1|UT1|UTE	7182	0.682268	4.35704	2.15868	0.0449151	0.611972	-4.67661
chr2	148021011	148516971	+	ENSG00000204406.14	protein_coding	MBD5	55777	methyl-CpG binding domain protein 5	MRD1	24403	0.23217	5.39411	2.11712	0.0449419	0.611972	-4.96377
chr19	11505929	11529172	-	ENSG00000130159.14	protein_coding	ECSIT	51295	ECSIT signaling integrator	SITPEC	2355	-0.280916	5.1686	-2.11548	0.0450942	0.611972	-4.9247
chr5	82279462	82386977	+	ENSG00000205464.12	protein_coding	ATP6AP1L	92270	ATPase H+ transporting accessory protein 1 like	-	7229	0.560268	2.18605	2.11472	0.0451652	0.611972	-4.21983
chr2	86199355	86213790	+	ENSG00000132313.15	protein_coding	MRPL35	51318	mitochondrial ribosomal protein L35	L35mt|MRP-L35	3825	0.418155	4.64262	2.12009	0.0451669	0.611972	-4.82895
chr1	197504748	197775696	-	ENSG00000213047.13	protein_coding	DENND1B	163486	DENN domain containing 1B	C1ORF18|C1orf218|FAM31B	13203	0.320439	5.16096	2.11462	0.0451749	0.611972	-4.90115
chr15	40569299	40574949	+	ENSG00000166133.18	protein_coding	RPUSD2	27079	RNA pseudouridine synthase domain containing 2	C15orf19|C18B11|PUS9	2489	-0.455819	3.80291	-2.11404	0.0452283	0.611972	-4.57358
chr4	109560209	109688719	+	ENSG00000005059.16	protein_coding	MCUB	55013	mitochondrial calcium uniporter dominant negative subunit beta	CCDC109B	3555	-0.195157	7.58807	-2.11371	0.0452599	0.611972	-5.19401
chr3	101561868	101566446	+	ENSG00000174173.7	protein_coding	TRMT10C	54931	tRNA methyltransferase 10C, mitochondrial RNase P subunit	COXPD30|HNYA|MRPP1|RG9MTD1	1882	-0.523414	4.08451	-2.11694	0.0453217	0.611972	-4.59881
chr22	42058334	42070842	-	ENSG00000198951.12	protein_coding	NAGA	4668	alpha-N-acetylgalactosaminidase	D22S674|GALB	3726	0.373165	3.88977	2.11123	0.045492	0.611972	-4.65858
chr9	35658875	35675866	-	ENSG00000137135.18	protein_coding	ARHGEF39	84904	Rho guanine nucleotide exchange factor 39	C9orf100	6405	0.728459	1.96254	2.11119	0.045496	0.611972	-4.16905
chr19	6379572	6393981	-	ENSG00000125651.14	protein_coding	GTF2F1	2962	general transcription factor IIF subunit 1	BTF4|RAP74|TF2F1|TFIIF	2876	0.192619	6.51736	2.11113	0.0455019	0.611972	-5.1362
chr2	240998618	241095568	+	ENSG00000162804.14	protein_coding	SNED1	25992	sushi, nidogen and EGF like domains 1	IRE-BP1|SST3|Snep	13812	-0.577105	5.7994	-2.16563	0.0455201	0.611972	-4.97297
chr14	65410592	65744121	+	ENSG00000033170.17	protein_coding	FUT8	2530	fucosyltransferase 8	CDGF|CDGF1	6976	-0.376797	4.17647	-2.11057	0.0455541	0.611972	-4.70492
chrX	65588377	65741931	+	ENSG00000147065.17	protein_coding	MSN	4478	moesin	HEL70|IMD50	5987	0.164594	9.40605	2.10926	0.0456773	0.612735	-5.24643
chr7	48035511	48061304	+	ENSG00000164746.14	protein_coding	C7orf57	136288	chromosome 7 open reading frame 57	-	2275	-1.32967	-0.580497	-2.10847	0.0457523	0.612735	-3.734
chr9	122144058	122159779	-	ENSG00000119421.7	protein_coding	NDUFA8	4702	NADH:ubiquinone oxidoreductase subunit A8	CI-19KD|CI-PGIV|PGIV	804	0.504227	3.36135	2.10757	0.045837	0.612735	-4.51981
chr17	12020829	12143830	+	ENSG00000065559.15	protein_coding	MAP2K4	6416	mitogen-activated protein kinase kinase 4	JNKK|JNKK1|MAPKK4|MEK4|MKK4|PRKMK4|SAPKK-1|SAPKK1|SEK1|SERK1|SKK1	5709	-0.215804	5.53392	-2.10707	0.0458844	0.612735	-5.00742
chr11	28020619	28108156	-	ENSG00000121621.7	protein_coding	KIF18A	81930	kinesin family member 18A	MS-KIF18A|PPP1R99	4517	1.46583	-0.269157	2.10667	0.0459222	0.612735	-3.74298
chr16	21834569	21880827	-	ENSG00000185864.16	protein_coding	NPIPB4	440345	nuclear pore complex interacting protein family member B4	61E3.4	7773	-0.461682	3.86796	-2.10667	0.0459227	0.612735	-4.61477
chr17	82418318	82442645	+	ENSG00000169660.17	protein_coding	HEXD	284004	hexosaminidase D	HEXDC	4541	0.225499	7.50573	2.10594	0.0459914	0.612959	-5.21036
chr2	33583660	33599382	-	ENSG00000119812.19	protein_coding	FAM98A	25940	family with sequence similarity 98 member A	-	4919	0.320292	4.54378	2.10487	0.0460938	0.613472	-4.78283
chr17	1779485	1830634	-	ENSG00000186532.12	protein_coding	SMYD4	114826	SET and MYND domain containing 4	ZMYND21	6798	0.266481	5.31791	2.10444	0.0461339	0.613472	-4.95909
chr1	44783585	44788170	-	ENSG00000142959.5	protein_coding	BEST4	266675	bestrophin 4	VMD2L2	2512	-0.834535	0.93269	-2.10217	0.0463508	0.615662	-3.9469
chr20	18567347	18569563	+	ENSG00000232388.5	protein_coding	SMIM26	388789	small integral membrane protein 26	LINC00493	1098	-0.329316	4.57462	-2.10066	0.0464951	0.616658	-4.82982
chr10	13099449	13138308	+	ENSG00000123240.17	protein_coding	OPTN	10133	optineurin	ALS12|FIP2|GLC1E|HIP7|HYPL|NRP|TFIIIA-INTP	5138	0.185916	7.02079	2.10029	0.0465304	0.616658	-5.19377
chr9	33383179	33402682	-	ENSG00000165269.13	protein_coding	AQP7	364	aquaporin 7	AQP7L|AQPap|GLYCQTL	5253	-1.289	-0.0903105	-2.09957	0.0466	0.616887	-3.83831
chr19	37181579	37218153	-	ENSG00000245680.11	protein_coding	ZNF585B	92285	zinc finger protein 585B	SZFP41|Zfp27	7538	-0.322164	4.66121	-2.09823	0.0467283	0.617893	-4.82866
chr6	7881517	7910788	-	ENSG00000239264.9	protein_coding	TXNDC5	81567	thioredoxin domain containing 5	ENDOPDI|ERP46|HCC-2|HCC2|PDIA15|STRF8|UNQ364	4361	0.67908	1.79005	2.09631	0.046914	0.619654	-4.10799
chr2	28956611	29061373	+	ENSG00000189350.12	protein_coding	TOGARAM2	165186	TOG array regulator of axonemal microtubules 2	FAM179A	19816	0.643274	1.43902	2.09497	0.0470437	0.620453	-4.06246
chr20	62804835	62814000	+	ENSG00000060491.16	protein_coding	OGFR	11054	opioid growth factor receptor	-	4702	0.264933	7.02323	2.0946	0.0470797	0.620453	-5.20322
chr9	35736866	35749228	-	ENSG00000070610.14	protein_coding	GBA2	57704	glucosylceramidase beta 2	AD035|NLGase|SPG46	4803	0.228353	6.07796	2.09351	0.0471853	0.620904	-5.12147
chr3	52198086	52214327	+	ENSG00000023330.15	protein_coding	ALAS1	211	5'-aminolevulinate synthase 1	ALAS|ALAS-H|ALAS3|ALASH|MIG4	2536	0.40751	4.01312	2.09305	0.0472295	0.620904	-4.7156
chr22	26521996	26596717	-	ENSG00000128294.16	protein_coding	TPST2	8459	tyrosylprotein sulfotransferase 2	TANGO13B|TPST-2	6913	0.273234	4.98765	2.09204	0.0473283	0.620904	-4.94872
chr8	41529218	41545030	+	ENSG00000147536.12	protein_coding	GINS4	84296	GINS complex subunit 4	SLD5	5447	0.562978	2.08407	2.09201	0.0473314	0.620904	-4.19738
chr12	82223681	82358805	-	ENSG00000133773.12	protein_coding	CCDC59	29080	coiled-coil domain containing 59	BR22|HSPC128|TAP26	3518	-0.456646	6.38773	-2.12813	0.0475064	0.620904	-5.07907
chr14	31291788	31420550	-	ENSG00000129493.15	protein_coding	HEATR5A	25938	HEAT repeat containing 5A	C14orf125	10214	-0.382506	3.561	-2.08988	0.0475389	0.620904	-4.57464
chr10	61901684	62096944	+	ENSG00000150347.16	protein_coding	ARID5B	84159	AT-rich interaction domain 5B	DESRT|MRF-2|MRF2	8760	-0.496672	6.84024	-2.14226	0.0475688	0.620904	-5.13502
chr8	97775057	97853013	+	ENSG00000104341.17	protein_coding	LAPTM4B	55353	lysosomal protein transmembrane 4 beta	LAPTM4beta|LC27	3197	-0.751691	2.01562	-2.08934	0.0475913	0.620904	-4.2047
chr2	96536743	96552634	+	ENSG00000196843.17	protein_coding	ARID5A	10865	AT-rich interaction domain 5A	MRF-1|MRF1|RP11-363D14	3561	-0.340134	7.21128	-2.10732	0.0477798	0.620904	-5.20281
chr14	104724229	104747325	+	ENSG00000185100.11	protein_coding	ADSS1	122622	adenylosuccinate synthase 1	ADSSL1|MPD5	5732	0.499492	2.31016	2.08732	0.0477896	0.620904	-4.26611
chr9	4792944	4885917	+	ENSG00000120158.12	protein_coding	RCL1	10171	RNA terminal phosphate cyclase like 1	RNAC|RPCL1	4140	-0.347426	4.18398	-2.08732	0.0477897	0.620904	-4.71853
chr9	90801787	90898549	+	ENSG00000165025.15	protein_coding	SYK	6850	spleen associated tyrosine kinase	p72-Syk	5210	-0.956426	0.988555	-2.086	0.047919	0.620904	-4.0224
chr6	36676460	36687337	+	ENSG00000124762.14	protein_coding	CDKN1A	1026	cyclin dependent kinase inhibitor 1A	CAP20|CDKN1|CIP1|MDA-6|P21|SDI1|WAF1|p21CIP1	2996	-1.73944	-0.97353	-2.08581	0.0479384	0.620904	-3.75991
chr19	48296457	48321971	-	ENSG00000105479.16	protein_coding	CCDC114	93233	coiled-coil domain containing 114	CILD20	5145	-0.684154	1.6873	-2.08537	0.047982	0.620904	-4.06118
chr6	63521746	63583436	+	ENSG00000112245.12	protein_coding	PTP4A1	7803	protein tyrosine phosphatase 4A1	HH72|PRL-1|PRL1|PTP(CAAX1)|PTPCAAX1	5522	-1.19498	0.46782	-2.08518	0.0480002	0.620904	-3.87969
chr1	119031216	119140654	-	ENSG00000116874.12	protein_coding	WARS2	10352	tryptophanyl tRNA synthetase 2, mitochondrial	NEMMLAS|TrpRS|mtTrpRS	3830	-0.467843	2.49927	-2.08473	0.0480442	0.620904	-4.29341
chr1	119911553	120100779	-	ENSG00000134250.20	protein_coding	NOTCH2	4853	notch receptor 2	AGS2|HJCYS|hN2	19930	0.227854	7.06428	2.0846	0.0480572	0.620904	-5.23035
chr17	7389727	7394842	-	ENSG00000187838.17	protein_coding	PLSCR3	57048	phospholipid scramblase 3	-	2833	-0.462851	3.34459	-2.084	0.0481171	0.620904	-4.53924
chr10	112149865	112215377	-	ENSG00000119927.14	protein_coding	GPAM	57678	glycerol-3-phosphate acyltransferase, mitochondrial	GPAT|GPAT1	9809	0.27544	4.62475	2.08379	0.0481371	0.620904	-4.85664
chr11	59142748	59155039	+	ENSG00000166801.16	protein_coding	FAM111A	63901	family with sequence similarity 111 member A	GCLEB|KCS2	7221	0.219133	8.04549	2.08274	0.0482418	0.620904	-5.27087
chr8	81280536	81284777	+	ENSG00000164687.11	protein_coding	FABP5	2171	fatty acid binding protein 5	E-FABP|EFABP|KFABP|PA-FABP|PAFABP	1904	1.14477	0.0650642	2.08185	0.0483292	0.620904	-3.8193
chr20	33675477	33686385	-	ENSG00000101412.13	protein_coding	E2F1	1869	E2F transcription factor 1	E2F-1|RBAP1|RBBP3|RBP3	2690	-0.809152	1.11034	-2.08134	0.0483803	0.620904	-3.98738
chr4	25377263	25418498	+	ENSG00000053900.11	protein_coding	ANAPC4	29945	anaphase promoting complex subunit 4	APC4	7444	-0.244446	6.90431	-2.08047	0.0484663	0.620904	-5.20935
chr1	33256492	33300719	+	ENSG00000160094.15	protein_coding	ZNF362	149076	zinc finger protein 362	RN|lin-29	3384	-0.209645	5.57076	-2.07975	0.0485383	0.620904	-5.06763
chr5	31639131	32110932	+	ENSG00000133401.16	protein_coding	PDZD2	23037	PDZ domain containing 2	AIPC|PAPIN|PDZK3|PIN1	15922	0.601598	3.60412	2.09435	0.0485435	0.620904	-4.62713
chr19	36687612	36727701	+	ENSG00000189042.13	protein_coding	ZNF567	163081	zinc finger protein 567	-	4724	-0.318029	4.24484	-2.07962	0.048551	0.620904	-4.76486
chr15	90883695	90895776	+	ENSG00000182511.12	protein_coding	FES	2242	FES proto-oncogene, tyrosine kinase	FPS	4202	1.68543	-0.718109	2.07815	0.0486975	0.620904	-3.77097
chr8	144148016	144261940	+	ENSG00000179832.17	protein_coding	MROH1	727957	maestro heat like repeat family member 1	HEATR7A	10903	-0.193685	6.90946	-2.07785	0.0487281	0.620904	-5.22521
chr9	36036913	36124455	+	ENSG00000122707.12	protein_coding	RECK	8434	reversion inducing cysteine rich protein with kazal motifs	ST15	5569	0.224899	5.3743	2.07751	0.0487623	0.620904	-5.03404
chr11	19117099	19176422	+	ENSG00000177054.14	protein_coding	ZDHHC13	54503	zinc finger DHHC-type palmitoyltransferase 13	HIP14L|HIP3RP	7759	0.275973	5.17279	2.0771	0.0488033	0.620904	-4.98945
chr12	31073860	31104799	+	ENSG00000013573.17	protein_coding	DDX11	1663	DEAD/H-box helicase 11	CHL1|CHLR1|KRG2|WABS	8367	1.23319	5.3953	2.15223	0.0489474	0.620904	-4.97484
chr8	23678697	23682938	-	ENSG00000167034.10	protein_coding	NKX3-1	4824	NK3 homeobox 1	BAPX2|NKX3|NKX3.1|NKX3A	3278	-1.59831	-0.2758	-2.07502	0.0490118	0.620904	-3.80984
chr3	138187248	138298384	+	ENSG00000114098.18	protein_coding	ARMC8	25852	armadillo repeat containing 8	GID5|HSPC056|S863-2|VID28	9843	-0.195151	6.24432	-2.07501	0.0490128	0.620904	-5.1653
chr16	2275881	2340746	-	ENSG00000167972.14	protein_coding	ABCA3	21	ATP binding cassette subfamily A member 3	ABC-C|ABC3|EST111653|LBM180|SMDP3	7804	0.390632	3.55255	2.07452	0.0490616	0.620904	-4.62824
chr2	240435663	240468076	+	ENSG00000063660.9	protein_coding	GPC1	2817	glypican 1	glypican	6522	1.26985	0.0652641	2.07447	0.0490668	0.620904	-3.83561
chr3	129001629	129040742	+	ENSG00000114654.7	protein_coding	EFCC1	79825	EF-hand and coiled-coil domain containing 1	C3orf73|CCDC48	2945	1.20362	0.334172	2.07423	0.0490914	0.620904	-3.85427
chr5	146084313	146105577	-	ENSG00000173261.9	protein_coding	PLAC8L1	153770	PLAC8 like 1	-	1937	1.49339	-1.06025	2.07406	0.0491076	0.620904	-3.78465
chr11	61299451	61342596	-	ENSG00000167986.14	protein_coding	DDB1	1642	damage specific DNA binding protein 1	DDBA|UV-DDB1|XAP1|XPCE|XPE|XPE-BF	13769	0.180646	7.14304	2.074	0.0491144	0.620904	-5.25496
chr7	101239458	101252316	-	ENSG00000214253.9	protein_coding	FIS1	51024	fission, mitochondrial 1	CGI-135|TTC11	1791	0.217933	6.06215	2.07301	0.0492136	0.621227	-5.15835
chr15	90868588	90883458	+	ENSG00000140564.12	protein_coding	FURIN	5045	furin, paired basic amino acid cleaving enzyme	FUR|PACE|PCSK3|SPC1	4732	0.206358	6.11684	2.07147	0.0493688	0.621227	-5.16289
chr17	8188345	8190180	-	ENSG00000196544.8	protein_coding	BORCS6	54785	BLOC-1 related complex subunit 6	C17orf59|PRO2472	1836	0.501479	3.31059	2.07142	0.0493744	0.621227	-4.58368
chr12	47079603	47236662	+	ENSG00000179715.13	protein_coding	PCED1B	91523	PC-esterase domain containing 1B	FAM113B	2618	-0.290153	7.86683	-2.0801	0.0493931	0.621227	-5.27965
chr10	114938195	114977676	+	ENSG00000165832.6	protein_coding	TRUB1	142940	TruB pseudouridine synthase family member 1	PUS4	3599	0.32327	4.35059	2.0711	0.0494069	0.621227	-4.7885
chr15	44562696	44663678	-	ENSG00000104133.15	protein_coding	SPG11	80208	SPG11 vesicle trafficking associated, spatacsin	ALS5|CMT2X|KIAA1840	11853	0.151238	7.8146	2.07061	0.0494559	0.621227	-5.28494
chr2	111611639	111884690	-	ENSG00000153107.13	protein_coding	ANAPC1	64682	anaphase promoting complex subunit 1	APC1|MCPR|TSG24	13984	-0.230308	5.11333	-2.06914	0.0496058	0.621952	-4.99282
chr4	87303789	87322886	-	ENSG00000170509.12	protein_coding	HSD17B13	345275	hydroxysteroid 17-beta dehydrogenase 13	HMFN0376|NIIL497|SCDR9|SDR16C3	2377	-1.09282	0.417686	-2.06901	0.049619	0.621952	-3.87556
chr17	17681458	17811453	+	ENSG00000108557.19	protein_coding	RAI1	10743	retinoic acid induced 1	SMCR|SMS	9708	0.270239	5.94239	2.0669	0.0498329	0.62375	-5.16366
chr1	201483530	201509456	-	ENSG00000159176.14	protein_coding	CSRP1	1465	cysteine and glycine rich protein 1	CRP|CRP1|CSRP|CYRP|D1S181E|HEL-141|HEL-S-286	10318	-0.189346	5.48466	-2.06611	0.0499137	0.62375	-5.08384
chr11	68312591	68449275	+	ENSG00000162337.12	protein_coding	LRP5	4041	LDL receptor related protein 5	BMND1|EVR1|EVR4|HBM|LR3|LRP-5|LRP-7|LRP7|OPPG|OPS|OPTA1|PCLD4|VBCH2	6182	0.438207	2.47965	2.06529	0.0499974	0.62375	-4.38965
chr7	152134922	152436003	-	ENSG00000055609.19	protein_coding	KMT2C	58508	lysine methyltransferase 2C	HALR|KLEFS2|MLL3	20112	0.218904	8.12796	2.06499	0.0500281	0.62375	-5.30871
chr20	2461634	2470853	-	ENSG00000125835.19	protein_coding	SNRPB	6628	small nuclear ribonucleoprotein polypeptides B and B1	CCMS|COD|SNRPB1|Sm-B/B'|SmB/B'|SmB/SmB'|snRNP-B	1278	-0.200245	6.72161	-2.06419	0.0501103	0.62375	-5.23907
chr14	87837820	87993665	-	ENSG00000054983.17	protein_coding	GALC	2581	galactosylceramidase	-	6736	0.278131	4.75886	2.06388	0.0501421	0.62375	-4.92108
chr14	105398538	105450106	+	ENSG00000226174.7	protein_coding	TEX22	647310	testis expressed 22	-	2878	0.730105	1.37149	2.06361	0.0501693	0.62375	-4.04178
chr7	122073549	122144255	-	ENSG00000008311.15	protein_coding	AASS	10157	aminoadipate-semialdehyde synthase	LKR/SDH|LKRSDH|LORSDH	6664	-0.438365	3.88442	-2.06259	0.0502748	0.62375	-4.69215
chr15	71822291	72118577	-	ENSG00000066933.16	protein_coding	MYO9A	4649	myosin IXA	CMS24	20320	0.263587	6.27808	2.06158	0.0503787	0.62375	-5.19565
chr10	10798397	11336675	+	ENSG00000048740.18	protein_coding	CELF2	10659	CUGBP Elav-like family member 2	BRUNOL3|CELF-2|CUG-BP2|CUGBP2|ETR-3|ETR3|NAPOR	10978	-0.232551	9.26014	-2.06157	0.0503792	0.62375	-5.33096
chr1	6221193	6235972	-	ENSG00000116237.16	protein_coding	ICMT	23463	isoprenylcysteine carboxyl methyltransferase	HSTE14|MST098|MSTP098|PCCMT|PCMT|PPMT	4910	0.434286	4.59032	2.07012	0.0504016	0.62375	-4.90396
chr9	34650702	34661902	+	ENSG00000137070.18	protein_coding	IL11RA	3590	interleukin 11 receptor subunit alpha	CRSDA	4281	-0.240592	7.71395	-2.06114	0.0504235	0.62375	-5.30249
chr11	119189638	119196769	-	ENSG00000248712.7	protein_coding	CCDC153	283152	coiled-coil domain containing 153	-	2556	1.02246	0.392498	2.06077	0.0504617	0.62375	-3.89267
chr4	52590960	52659301	-	ENSG00000109189.13	protein_coding	USP46	64854	ubiquitin specific peptidase 46	-	8895	-0.751748	2.72389	-2.06624	0.0505311	0.62375	-4.38246
chr19	48813018	48836510	-	ENSG00000087076.9	protein_coding	HSD17B14	51171	hydroxysteroid 17-beta dehydrogenase 14	DHRS10|SDR47C1|retSDR3	1112	-1.45091	-0.380533	-2.05923	0.0506208	0.62375	-3.81952
chr9	113275642	113294009	+	ENSG00000136875.13	protein_coding	PRPF4	9128	pre-mRNA processing factor 4	HPRP4|HPRP4P|PRP4|Prp4p|RP70|SNRNP60	4418	0.343425	4.88075	2.05896	0.0506493	0.62375	-4.97564
chr8	12721906	12756073	-	ENSG00000154359.13	protein_coding	LONRF1	91694	LON peptidase N-terminal domain and ring finger 1	RNF191	5709	-0.423247	3.11276	-2.05851	0.0506953	0.62375	-4.51116
chr6	52362123	52529886	+	ENSG00000096093.16	protein_coding	EFHC1	114327	EF-hand domain containing 1	EJM1|POC9|RIB72|dJ304B14.2	22744	-0.376554	4.11364	-2.05833	0.0507144	0.62375	-4.79113
chr3	193398967	193593111	-	ENSG00000127249.15	protein_coding	ATP13A4	84239	ATPase 13A4	-	8988	1.08362	2.36114	2.07797	0.0509303	0.625542	-4.22238
chr19	52749942	52786807	-	ENSG00000189190.10	protein_coding	ZNF600	162966	zinc finger protein 600	KR-ZNF1	6964	0.500053	5.50732	2.09213	0.0509792	0.625542	-5.03957
chr9	127935099	127937854	-	ENSG00000136908.18	protein_coding	DPM2	8818	dolichyl-phosphate mannosyltransferase subunit 2, regulatory	CDG1U	2503	-0.269924	4.885	-2.05539	0.0510192	0.625542	-4.97055
chr3	138160988	138174921	-	ENSG00000138231.13	protein_coding	DBR1	51163	debranching RNA lariats 1	-	3156	0.298449	4.36239	2.05421	0.0511428	0.625553	-4.83548
chr22	46360834	46537620	-	ENSG00000075275.18	protein_coding	CELSR1	9620	cadherin EGF LAG seven-pass G-type receptor 1	ADGRC1|CDHF9|FMI2|HFMI2|ME2	16045	-0.682302	2.62475	-2.05488	0.0511732	0.625553	-4.40311
chr7	107044705	107161811	+	ENSG00000005249.13	protein_coding	PRKAR2B	5577	protein kinase cAMP-dependent type II regulatory subunit beta	PRKAR2|RII-BETA	4262	-1.09937	0.670694	-2.05381	0.0511839	0.625553	-3.9373
chr2	36355778	36551135	+	ENSG00000150938.10	protein_coding	CRIM1	51232	cysteine rich transmembrane BMP regulator 1	CRIM-1|S52	7270	0.707623	1.87466	2.05335	0.0512322	0.625553	-4.21985
chr16	29806106	29811164	+	ENSG00000103495.14	protein_coding	MAZ	4150	MYC associated zinc finger protein	PUR1|Pur-1|SAF-1|SAF-2|SAF-3|ZF87|ZNF801|Zif87	3512	0.200379	6.3939	2.05272	0.0512981	0.625709	-5.22967
chr1	20740266	20787323	-	ENSG00000127483.19	protein_coding	HP1BP3	50809	heterochromatin protein 1 binding protein 3	HP1-BP74|HP1BP74	9815	0.166157	8.83718	2.05152	0.0514242	0.626599	-5.3454
chr6	73241314	73310365	-	ENSG00000135314.12	protein_coding	KHDC1	80759	KH domain containing 1	C6orf147|C6orf148|Em:AC019205.8|KHDC1L|NDG1|bA257K9.4	3350	1.32864	-0.41035	2.05055	0.0515252	0.627183	-3.8448
chrX	153444720	153470587	-	ENSG00000183479.12	protein_coding	TREX2	11219	three prime repair exonuclease 2	-	2715	-0.514092	2.80214	-2.04954	0.0516318	0.627832	-4.41243
chr5	151742316	151772532	-	ENSG00000177556.12	protein_coding	ATOX1	475	antioxidant 1 copper chaperone	ATX1|HAH1	5239	0.299798	4.17794	2.04784	0.0518109	0.629361	-4.81142
chr2	73926826	73958961	+	ENSG00000114956.20	protein_coding	DGUOK	1716	deoxyguanosine kinase	MTDPS3|NCPH|PEOB4|dGK	1455	-0.206695	5.82241	-2.04634	0.0519693	0.630607	-5.1683
chr12	120127202	120194715	-	ENSG00000089154.11	protein_coding	GCN1	10985	GCN1 activator of EIF2AK4	GCN1L|GCN1L1|PRIC295	9660	0.164025	7.98146	2.04554	0.0520538	0.630607	-5.33857
chr14	76761468	76783015	+	ENSG00000071246.11	protein_coding	VASH1	22846	vasohibin 1	KIAA1036|TTCP 1	7223	-0.737172	2.24991	-2.04674	0.0521489	0.630607	-4.37118
chr9	33104082	33167356	-	ENSG00000086062.13	protein_coding	B4GALT1	2683	beta-1,4-galactosyltransferase 1	B4GAL-T1|CDG2D|GGTB2|GT1|GTB|beta4Gal-T1	4896	-0.360785	6.28627	-2.06287	0.0523217	0.630607	-5.21353
chr8	100150623	100154003	+	ENSG00000147669.11	protein_coding	POLR2K	5440	RNA polymerase II, I and III subunit K	ABC10-alpha|RPABC4|RPB10alpha|RPB12|RPB7.0|hRPB7.0|hsRPB10a	1673	-0.299803	4.80033	-2.04248	0.0523793	0.630607	-4.95694
chr10	127907061	128085855	+	ENSG00000132334.16	protein_coding	PTPRE	5791	protein tyrosine phosphatase receptor type E	HPTPE|PTPE|R-PTP-EPSILON	11235	0.245043	5.76955	2.04171	0.052462	0.630607	-5.16557
chr2	183117513	183161680	+	ENSG00000163002.13	protein_coding	NUP35	129401	nucleoporin 35	MP-44|MP44|NP44|NUP53	4025	-0.427672	3.10526	-2.04137	0.0524983	0.630607	-4.52294
chr3	143971823	144048719	+	ENSG00000181744.9	protein_coding	DIPK2A	205428	divergent protein kinase domain 2A	C3orf58|DIA1|GoPro49|HASF	5463	-0.410506	3.73182	-2.04121	0.0525155	0.630607	-4.67786
chr5	176063748	176126959	+	ENSG00000285476.1	protein_coding	AC139491.7	NA	NA	NA	4334	-1.05868	3.83286	-2.10052	0.0525585	0.630607	-4.62767
chr15	28111040	28322179	-	ENSG00000128731.18	protein_coding	HERC2	8924	HECT and RLD domain containing E3 ubiquitin protein ligase 2	D15F37S1|MRT38|SHEP1|jdf2|p528	20190	0.441961	4.13618	2.0411	0.0527024	0.630607	-4.82386
chr14	21521080	21537216	-	ENSG00000165821.12	protein_coding	SALL2	6297	spalt like transcription factor 2	COLB|HSAL2|Sal-2|ZNF795|p150(Sal2)	5383	0.392015	3.61662	2.03923	0.0527272	0.630607	-4.70631
chr17	78787381	78841441	-	ENSG00000055483.19	protein_coding	USP36	57602	ubiquitin specific peptidase 36	DUB1	9235	0.22445	7.43887	2.03917	0.0527332	0.630607	-5.33088
chr19	29665459	29675477	+	ENSG00000166289.6	protein_coding	PLEKHF1	79156	pleckstrin homology and FYVE domain containing 1	APPD|LAPF|PHAFIN1|ZFYVE15	2298	0.579759	3.73296	2.05314	0.0527535	0.630607	-4.71949
chr19	7920338	7923250	+	ENSG00000104976.12	protein_coding	SNAPC2	6618	small nuclear RNA activating complex polypeptide 2	PTFDELTA|SNAP45	1978	0.464357	3.34561	2.03877	0.0527765	0.630607	-4.62416
chr17	2322396	2336657	-	ENSG00000167721.11	protein_coding	TSR1	55720	TSR1 ribosome maturation factor	-	4802	0.192164	5.76431	2.03862	0.052792	0.630607	-5.16316
chr11	14277922	14364506	-	ENSG00000133818.14	protein_coding	RRAS2	22800	RAS related 2	NS12|TC21	3456	0.703021	2.21253	2.0379	0.0528693	0.630607	-4.22911
chr2	218568580	218597080	+	ENSG00000144580.14	protein_coding	CNOT9	9125	CCR4-NOT transcription complex subunit 9	CAF40|CT129|RCD-1|RCD1|RQCD1	5289	-0.166757	6.33555	-2.03772	0.0528889	0.630607	-5.2498
chr17	7563287	7578715	+	ENSG00000277957.1	protein_coding	SENP3-EIF4A1	100533955	SENP3-EIF4A1 readthrough (NMD candidate)	-	3519	1.08633	-0.121963	2.03721	0.0529438	0.630607	-3.90236
chr12	105235290	105396097	+	ENSG00000235162.9	protein_coding	C12orf75	387882	chromosome 12 open reading frame 75	AGD3|OCC-1|OCC1	2693	0.524037	3.61174	2.04137	0.0530232	0.630607	-4.72377
chr5	140638740	140647771	-	ENSG00000131495.9	protein_coding	NDUFA2	4695	NADH:ubiquinone oxidoreductase subunit A2	B8|CD14|CIB8|MC1DN13	1474	-0.250403	4.99264	-2.03639	0.0530322	0.630607	-5.0284
chr11	71929018	71997597	+	ENSG00000137522.18	protein_coding	RNF121	55298	ring finger protein 121	-	3250	0.291001	4.24279	2.03622	0.053051	0.630607	-4.8373
chr12	102073103	102120120	-	ENSG00000075188.9	protein_coding	NUP37	79023	nucleoporin 37	MCPH24|p37	3488	-0.327638	3.90127	-2.03586	0.0530897	0.630607	-4.74307
chr8	93754844	93819234	+	ENSG00000164953.16	protein_coding	TMEM67	91147	transmembrane protein 67	JBTS6|MECKELIN|MKS3|NPHP11|TNEM67	8345	0.418987	2.86119	2.03526	0.0531541	0.630737	-4.46169
chr5	113022099	113488823	-	ENSG00000171444.18	protein_coding	MCC	4163	MCC regulator of WNT signaling pathway	MCC1	10739	0.512028	3.49755	2.03436	0.0532511	0.631154	-4.63773
chr6	53001279	53061824	-	ENSG00000112144.16	protein_coding	CILK1	22858	ciliogenesis associated kinase 1	ECO|EJM10|ICK|LCK2|MRK|hICK	6302	-0.266753	6.00334	-2.03394	0.0532963	0.631154	-5.20519
chr14	100143957	100159645	-	ENSG00000168350.8	protein_coding	DEGS2	123099	delta 4-desaturase, sphingolipid 2	C14orf66|DES2|FADS8	3948	1.48995	0.326766	2.03299	0.0533996	0.6312	-3.88014
chr1	43946950	43968022	+	ENSG00000117408.11	protein_coding	IPO13	9670	importin 13	IMP13|KAP13|LGL2|RANBP13	5072	0.272674	5.16031	2.03292	0.0534072	0.6312	-5.07528
chr21	5022493	5040666	+	ENSG00000277117.5	protein_coding	FP565260.3	NA	NA	NA	3357	-1.47754	0.0292487	-2.03125	0.0535884	0.631416	-3.88978
chr9	87497228	87708634	+	ENSG00000196730.13	protein_coding	DAPK1	1612	death associated protein kinase 1	DAPK|ROCO3	8908	-0.976764	1.83007	-2.03895	0.0536143	0.631416	-4.23068
chr14	32076114	32159728	+	ENSG00000100852.13	protein_coding	ARHGAP5	394	Rho GTPase activating protein 5	GFI2|RhoGAP5|p190-B|p190BRhoGAP	10888	-0.42649	5.25064	-2.04647	0.0536538	0.631416	-5.03441
chr2	105038069	105099960	+	ENSG00000135972.9	protein_coding	MRPS9	64965	mitochondrial ribosomal protein S9	MRP-S9|RPMS9|S9mt	1829	-0.307094	4.62149	-2.03055	0.0536648	0.631416	-4.95404
chr12	133181409	133214832	+	ENSG00000090612.22	protein_coding	ZNF268	10795	zinc finger protein 268	HZF3	14096	-0.30131	5.57389	-2.03029	0.0536931	0.631416	-5.11966
chr2	96143169	96145440	-	ENSG00000158050.5	protein_coding	DUSP2	1844	dual specificity phosphatase 2	PAC-1|PAC1	1929	-0.961283	5.5402	-2.09858	0.0537488	0.631441	-4.99058
chr6	36948263	36964837	+	ENSG00000164530.15	protein_coding	PI16	221476	peptidase inhibitor 16	CD364|CRISP9|MSMBBP|PSPBP	2305	-1.5133	3.44775	-2.09359	0.0540031	0.631588	-4.48611
chr17	28573115	28576948	-	ENSG00000109107.14	protein_coding	ALDOC	230	aldolase, fructose-bisphosphate C	ALDC	2612	0.269501	5.02656	2.02729	0.0540209	0.631588	-5.07333
chr6	149566294	149591748	+	ENSG00000055211.14	protein_coding	GINM1	116254	glycoprotein integral membrane 1	C6orf72	2250	-0.300592	4.79051	-2.02722	0.0540287	0.631588	-4.98631
chr16	2429394	2458854	+	ENSG00000162063.13	protein_coding	CCNF	899	cyclin F	FBX1|FBXO1	6309	-0.575985	2.19857	-2.0269	0.0540638	0.631588	-4.40088
chr11	842812	867116	+	ENSG00000214063.11	protein_coding	TSPAN4	7106	tetraspanin 4	NAG-2|NAG2|TETRASPAN|TM4SF7|TSPAN-4	5837	-0.59667	2.83724	-2.02689	0.0540646	0.631588	-4.4557
chr12	57243453	57251188	-	ENSG00000185482.8	protein_coding	STAC3	246329	SH3 and cysteine rich domain 3	MYPBB|NAM	2091	-0.5761	2.00227	-2.02673	0.0540826	0.631588	-4.28326
chr4	6781375	6884170	+	ENSG00000170871.12	protein_coding	KIAA0232	9778	KIAA0232	-	8499	0.257511	6.05373	2.02578	0.0541871	0.632182	-5.24282
chr16	18417325	18562211	-	ENSG00000185164.14	protein_coding	NOMO2	283820	NODAL modulator 2	Nomo|PM5	6801	0.57899	1.87684	2.02489	0.0542843	0.632552	-4.23417
chr18	11851413	11854444	+	ENSG00000255112.3	protein_coding	CHMP1B	57132	charged multivesicular body protein 1B	C10orf2|C18-ORF2|C18orf2|CHMP1.5|Vps46-2|Vps46B|hVps46-2	3032	-0.266985	6.19221	-2.02443	0.0543353	0.632552	-5.2465
chr8	23190452	23225102	-	ENSG00000104689.10	protein_coding	TNFRSF10A	8797	TNF receptor superfamily member 10a	APO2|CD261|DR4|TRAILR-1|TRAILR1	2927	-0.263615	6.24374	-2.02403	0.0543796	0.632552	-5.26832
chr4	186208979	186258471	+	ENSG00000164344.16	protein_coding	KLKB1	3818	kallikrein B1	KLK3|PKK|PKKD|PPK	2915	0.568808	2.58185	2.02343	0.0544453	0.632692	-4.46736
chr22	29480218	29491390	+	ENSG00000100285.10	protein_coding	NEFH	4744	neurofilament heavy	CMT2CC|NFH	3795	-0.847027	0.953783	-2.02229	0.0545707	0.633354	-4.06141
chrX	154487306	154490690	-	ENSG00000126903.16	protein_coding	SLC10A3	8273	solute carrier family 10 member 3	DXS253E|P3	2247	0.319206	4.44421	2.02176	0.0546302	0.633354	-4.94413
chr19	49739753	49763306	-	ENSG00000126467.11	protein_coding	TSKS	60385	testis specific serine kinase substrate	PPP1R161|STK22S1|TSKS1|TSSKS	2367	1.30857	0.811281	2.03171	0.0546634	0.633354	-4.06081
chr4	1982717	2041903	-	ENSG00000185049.16	protein_coding	NELFA	7469	negative elongation factor complex member A	NELF-A|P/OKcl.15|WHSC2	5057	-0.236344	5.48452	-2.01991	0.0548352	0.633437	-5.16945
chr11	10308313	10507579	+	ENSG00000133805.15	protein_coding	AMPD3	272	adenosine monophosphate deaminase 3	-	6793	0.260063	5.4666	2.01964	0.0548649	0.633437	-5.15792
chr1	246839098	246931948	-	ENSG00000153207.16	protein_coding	AHCTF1	25909	AT-hook containing transcription factor 1	ELYS|MST108|MSTP108|TMBS62	9579	-0.212945	6.45005	-2.01958	0.0548712	0.633437	-5.28917
chrX	108044970	108079184	+	ENSG00000101842.14	protein_coding	VSIG1	340547	V-set and immunoglobulin domain containing 1	1700062D20Rik|GPA34|dJ889N15.1	3769	-0.256977	5.31954	-2.01915	0.0549199	0.633437	-5.12928
chr14	74084796	74201235	+	ENSG00000205659.11	protein_coding	LIN52	91750	lin-52 DREAM MuvB core complex component	C14orf46|c14_5549	3692	-0.359031	3.95996	-2.0176	0.0550917	0.633437	-4.83625
chr9	76419850	76651203	+	ENSG00000187210.14	protein_coding	GCNT1	2650	glucosaminyl (N-acetyl) transferase 1	C2GNT|C2GNT-L|C2GNT1|G6NT|NACGT2|NAGCT2	9251	-0.769444	1.33258	-2.0175	0.0551033	0.633437	-4.16752
chr7	48088628	48108736	+	ENSG00000183696.14	protein_coding	UPP1	7378	uridine phosphorylase 1	UDRPASE|UP|UPASE|UPP	4580	-0.21914	7.3839	-2.01746	0.0551073	0.633437	-5.36184
chr16	87083562	87317420	-	ENSG00000260456.7	protein_coding	C16orf95	100506581	chromosome 16 open reading frame 95	-	3670	1.33123	-0.324764	2.01687	0.0551739	0.633437	-3.8741
chr20	35267885	35280043	-	ENSG00000261582.1	protein_coding	AL121753.1	NA	NA	NA	529	-0.986193	0.421903	-2.01669	0.055193	0.633437	-4.04369
chr12	459939	563509	+	ENSG00000139044.12	protein_coding	B4GALNT3	283358	beta-1,4-N-acetyl-galactosaminyltransferase 3	-	7292	-1.56526	0.924614	-2.03043	0.0554357	0.633437	-3.99738
chr3	149964904	150050788	-	ENSG00000070087.14	protein_coding	PFN2	5217	profilin 2	D3S1319E|PFL	3709	-0.48157	3.14182	-2.01432	0.0554587	0.633437	-4.59485
chr6	138773509	138793319	+	ENSG00000024862.17	protein_coding	CCDC28A	25901	coiled-coil domain containing 28A	C6orf80|CCRL1AP	1507	-0.332153	4.41057	-2.01419	0.0554727	0.633437	-4.92038
chr18	158383	214629	+	ENSG00000101557.15	protein_coding	USP14	9097	ubiquitin specific peptidase 14	TGT	5987	-0.254914	6.07075	-2.01383	0.0555139	0.633437	-5.23353
chr1	186375838	186421378	+	ENSG00000157181.16	protein_coding	ODR4	54953	odr-4 GPCR localization factor homolog	C1orf27|TTG1|odr-4	4073	-0.243065	5.48783	-2.01325	0.0555791	0.633437	-5.15461
chr22	21759657	21867680	-	ENSG00000100030.15	protein_coding	MAPK1	5594	mitogen-activated protein kinase 1	ERK|ERK-2|ERK2|ERT1|MAPK2|P42MAPK|PRKM1|PRKM2|p38|p40|p41|p41mapk|p42-MAPK	6179	0.184425	7.4677	2.01323	0.055581	0.633437	-5.37841
chr11	61402641	61430031	-	ENSG00000149532.16	protein_coding	CPSF7	79869	cleavage and polyadenylation specific factor 7	CFIm59	6036	0.204181	7.63257	2.01301	0.0556057	0.633437	-5.38786
chrX	24054946	24078810	+	ENSG00000130741.11	protein_coding	EIF2S3	1968	eukaryotic translation initiation factor 2 subunit gamma	EIF2|EIF2G|EIF2gamma|MEHMO|MRXSBRK|eIF-2gA	4081	-0.286233	7.82113	-2.02112	0.0556242	0.633437	-5.37437
chr11	62646848	62653302	-	ENSG00000185085.2	protein_coding	INTS5	80789	integrator complex subunit 5	INT5|KIAA1698	3285	0.573308	4.38267	2.04359	0.0556889	0.633437	-4.93416
chr9	129175552	129178261	-	ENSG00000188483.8	protein_coding	IER5L	389792	immediate early response 5 like	bA247A12.2	2710	2.43908	0.671134	2.0624	0.0556909	0.633437	-3.95567
chr3	94047836	94063389	-	ENSG00000178700.9	protein_coding	DHFR2	200895	dihydrofolate reductase 2	DHFRL1|DHFRP4	4352	0.512557	3.27823	2.01085	0.0558486	0.633604	-4.64101
chr13	113177536	113208715	-	ENSG00000126226.22	protein_coding	PCID2	55795	PCI domain containing 2	F10	6246	-0.198815	6.65209	-2.01078	0.0558566	0.633604	-5.33102
chr19	7595863	7618304	+	ENSG00000076826.10	protein_coding	CAMSAP3	57662	calmodulin regulated spectrin associated protein family member 3	KIAA1543|NEZHA|PPP1R80	4884	-1.07235	0.196652	-2.00973	0.055975	0.633604	-3.96551
chr12	12357078	12471233	+	ENSG00000165714.11	protein_coding	BORCS5	118426	BLOC-1 related complex subunit 5	LOH12CR1|LOH1CR12	6522	0.467865	4.29753	2.01487	0.0560645	0.633604	-4.87944
chr6	149446795	149485014	-	ENSG00000178199.14	protein_coding	ZC3H12D	340152	zinc finger CCCH-type containing 12D	C6orf95|MCPIP4|TFL|dJ281H8.1|p34	6686	-0.419975	5.47055	-2.02922	0.0560868	0.633604	-5.13151
chr19	38730187	38769904	-	ENSG00000182472.9	protein_coding	CAPN12	147968	calpain 12	-	5966	-1.66022	-0.955797	-2.00869	0.0560932	0.633604	-3.86503
chr15	66293217	66333898	+	ENSG00000166938.13	protein_coding	DIS3L	115752	DIS3 like exosome 3'-5' exoribonuclease	DIS3L1	5436	0.223441	6.10769	2.0083	0.0561373	0.633604	-5.2727
chr3	52813282	52835729	-	ENSG00000243696.5	protein_coding	AC006254.1	NA	NA	NA	6334	-0.488033	3.19596	-2.00791	0.0561811	0.633604	-4.65518
chr11	43358920	43494933	+	ENSG00000052841.15	protein_coding	TTC17	55761	tetratricopeptide repeat domain 17	-	11296	-0.17287	7.4872	-2.00593	0.0564065	0.633604	-5.38956
chr19	45782947	45792845	-	ENSG00000185800.12	protein_coding	DMWD	1762	DM1 locus, WD repeat containing	D19S593E|DMR-N9|DMRN9|gene59	5701	-0.298813	4.78504	-2.00544	0.0564623	0.633604	-5.05368
chr1	169511951	169586588	-	ENSG00000198734.12	protein_coding	F5	2153	coagulation factor V	FVL|PCCF|RPRGL1|THPH2	9373	-0.356006	4.14077	-2.00528	0.0564805	0.633604	-4.88456
chr8	95244913	95269201	-	ENSG00000156172.6	protein_coding	C8orf37	157657	chromosome 8 open reading frame 37	BBS21|CORD16|FAP418|MOT25|RP64|smalltalk	3340	0.510982	2.48537	2.00442	0.0565782	0.633604	-4.38218
chr19	10960932	11079426	+	ENSG00000127616.19	protein_coding	SMARCA4	6597	SWI/SNF related, matrix associated, actin dependent regulator of chromatin, subfamily a, member 4	BAF190|BAF190A|BRG1|CSS4|MRD16|RTPS2|SNF2|SNF2-beta|SNF2L4|SNF2LB|SWI2|hSNF2b	15671	-0.165248	7.44976	-2.00386	0.0566422	0.633604	-5.39383
chr5	37379285	37753435	+	ENSG00000082068.9	protein_coding	WDR70	55100	WD repeat domain 70	-	6966	-0.236026	4.97742	-2.00384	0.0566444	0.633604	-5.08696
chr1	85018082	85048500	-	ENSG00000055732.13	protein_coding	MCOLN3	55283	mucolipin 3	TRP-ML3|TRPML3	6624	-1.43249	-0.497996	-2.00367	0.0566645	0.633604	-3.92263
chr22	46576012	46679790	+	ENSG00000075240.17	protein_coding	GRAMD4	23151	GRAM domain containing 4	DIP	4901	-0.245376	4.78762	-2.00303	0.0567375	0.633604	-5.05183
chr6	42183284	42194956	-	ENSG00000112599.9	protein_coding	GUCA1B	2979	guanylate cyclase activator 1B	GCAP 2|GCAP2|GUCA2|RP48	2270	-0.556113	2.58599	-2.00291	0.056751	0.633604	-4.51082
chr19	53445001	53458261	+	ENSG00000160336.15	protein_coding	ZNF761	388561	zinc finger protein 761	ZNF468	4674	-0.320428	5.24584	-2.00214	0.0568398	0.633604	-5.07745
chr16	88696499	88706408	-	ENSG00000158717.11	protein_coding	RNF166	115992	ring finger protein 166	-	4377	-0.258754	7.78802	-2.00469	0.0568429	0.633604	-5.40646
chr11	125883614	125900646	+	ENSG00000198331.11	protein_coding	HYLS1	219844	HYLS1 centriolar and ciliogenesis associated	HLS	2389	0.57711	1.73538	2.00209	0.0568452	0.633604	-4.23554
chr1	170532131	170553834	+	ENSG00000120370.13	protein_coding	GORAB	92344	golgin, RAB6 interacting	GO|NTKLBP1|SCYL1BP1	4159	-0.260705	4.84327	-2.00138	0.0569263	0.633604	-5.06096
chr8	144477969	144502121	+	ENSG00000160972.9	protein_coding	PPP1R16A	84988	protein phosphatase 1 regulatory subunit 16A	MYPT3	5414	0.447863	3.57373	2.00134	0.0569307	0.633604	-4.7128
chr1	181033425	181061938	+	ENSG00000153029.14	protein_coding	MR1	3140	major histocompatibility complex, class I-related	HLALS	9348	0.265508	6.0056	2.00125	0.0569411	0.633604	-5.26386
chr20	18486540	18497225	-	ENSG00000089050.16	protein_coding	RBBP9	10741	RB binding protein 9, serine hydrolase	BOG|RBBP10	3843	0.441994	3.77429	2.00078	0.056996	0.633617	-4.77424
chr21	26835755	26845409	-	ENSG00000154734.15	protein_coding	ADAMTS1	9510	ADAM metallopeptidase with thrombospondin type 1 motif 1	C3-C5|METH1	7055	2.11592	-0.559183	2.01591	0.0570745	0.633779	-3.89643
chr10	133308914	133313162	+	ENSG00000198546.15	protein_coding	ZNF511	118472	zinc finger protein 511	Zfp511	2289	-0.284425	4.04722	-1.99972	0.057118	0.633779	-4.87704
chr1	230906243	230978875	-	ENSG00000143643.13	protein_coding	TTC13	79573	tetratricopeptide repeat domain 13	-	4212	0.194274	6.84652	1.99822	0.0572902	0.633907	-5.3647
chr2	27628247	27651511	+	ENSG00000198522.14	protein_coding	GPN1	11321	GPN-loop GTPase 1	ATPBD1A|MBDIN|NTPBP|RPAP4|XAB1	3749	-0.261888	5.14407	-1.99791	0.0573261	0.633907	-5.12689
chr12	56104537	56113910	+	ENSG00000170515.14	protein_coding	PA2G4	5036	proliferation-associated 2G4	EBP1|HG4-1|p38-2G4	3580	-0.184686	6.19154	-1.99747	0.0573765	0.633907	-5.31767
chr13	45464898	45536701	+	ENSG00000136152.15	protein_coding	COG3	83548	component of oligomeric golgi complex 3	SEC34	6087	-0.189779	6.52999	-1.99726	0.0574013	0.633907	-5.33466
chr5	180601506	180649624	-	ENSG00000037280.16	protein_coding	FLT4	2324	fms related receptor tyrosine kinase 4	CHTD7|FLT-4|FLT41|LMPH1A|LMPHM1|PCL|VEGFR-3|VEGFR3	8852	1.24245	2.72472	2.04809	0.0574281	0.633907	-4.46448
chr12	109553715	109573580	-	ENSG00000139428.12	protein_coding	MMAB	326625	metabolism of cobalamin associated B	ATR|CFAP23|cblB|cob	6018	0.260743	4.31973	1.99664	0.0574735	0.633907	-4.94643
chr6	13621498	13711835	-	ENSG00000010017.13	protein_coding	RANBP9	10048	RAN binding protein 9	BPM-L|BPM90|RANBPM|RanBP7	3618	-0.218059	6.55979	-1.99636	0.0575058	0.633907	-5.34212
chr11	88293592	88337761	-	ENSG00000109861.16	protein_coding	CTSC	1075	cathepsin C	CPPI|DPP-I|DPP1|DPPI|HMS|JP|JPD|PALS|PDON1|PLS	11395	0.274321	5.66877	1.99498	0.0576654	0.634195	-5.24428
chr2	206159585	206162928	+	ENSG00000114942.14	protein_coding	EEF1B2	1933	eukaryotic translation elongation factor 1 beta 2	EEF1B|EEF1B1|EF1B	1915	0.194435	7.70319	1.99451	0.05772	0.634195	-5.41612
chr3	8980591	9363053	-	ENSG00000196220.16	protein_coding	SRGAP3	9901	SLIT-ROBO Rho GTPase activating protein 3	ARHGAP14|MEGAP|SRGAP2|WRP	18924	0.515257	2.45178	1.99421	0.0577544	0.634195	-4.47836
chr15	90966040	90995629	-	ENSG00000198901.14	protein_coding	PRC1	9055	protein regulator of cytokinesis 1	ASE1	5523	1.53571	-0.78409	1.99393	0.0577878	0.634195	-3.88745
chr10	17315421	17454595	-	ENSG00000148488.17	protein_coding	ST8SIA6	338596	ST8 alpha-N-acetyl-neuraminide alpha-2,8-sialyltransferase 6	SIA8F|SIAT8-F|SIAT8F|ST8SIA-VI|ST8SiaVI	7063	2.06886	-1.06509	1.99942	0.0578475	0.634195	-3.89192
chr9	83242990	83538546	-	ENSG00000172159.16	protein_coding	FRMD3	257019	FERM domain containing 3	4.1O|EPB41L4O|EPB41LO|P410	6486	-0.858516	0.728404	-1.99335	0.0578545	0.634195	-4.02374
chr17	80544819	80966371	+	ENSG00000141564.15	protein_coding	RPTOR	57521	regulatory associated protein of MTOR complex 1	KOG1|Mip1	10302	-0.198071	6.63565	-1.99161	0.0580581	0.635836	-5.36442
chr17	50862223	50867978	-	ENSG00000141232.5	protein_coding	TOB1	10140	transducer of ERBB2, 1	APRO5|APRO6|PIG49|TOB|TROB|TROB1	2521	0.617319	6.79885	2.05069	0.0582173	0.636577	-5.29039
chr19	32719753	32829580	+	ENSG00000173809.18	protein_coding	TDRD12	91646	tudor domain containing 12	ECAT8	7026	-0.792519	1.29294	-1.98948	0.0583064	0.636577	-4.15106
chr9	95099054	95426796	-	ENSG00000158169.13	protein_coding	FANCC	2176	FA complementation group C	FA3|FAC|FACC	12809	0.351459	3.5487	1.9892	0.0583398	0.636577	-4.74155
chr8	144517992	144525172	+	ENSG00000160959.8	protein_coding	LRRC14	9684	leucine rich repeat containing 14	LRRC14A	6130	-0.241224	5.77764	-1.98918	0.0583416	0.636577	-5.27307
chr19	39971165	39981764	+	ENSG00000013275.8	protein_coding	PSMC4	5704	proteasome 26S subunit, ATPase 4	MIP224|RPT3|S6|TBP-7|TBP7	2550	-0.21784	5.55669	-1.98826	0.0584498	0.637167	-5.24353
chrX	155071420	155123074	+	ENSG00000185515.14	protein_coding	BRCC3	79184	BRCA1/BRCA2-containing complex subunit 3	BRCC36|C6.1A|CXorf53	3182	-0.252741	4.72875	-1.98501	0.0588332	0.639468	-5.03382
chr17	2755705	3037741	+	ENSG00000132359.15	protein_coding	RAP1GAP2	23108	RAP1 GTPase activating protein 2	GARNL4|RAP1GA3	7532	0.227525	5.7995	1.98414	0.0589356	0.639468	-5.28851
chr9	113313222	113340298	-	ENSG00000148225.16	protein_coding	WDR31	114987	WD repeat domain 31	-	4933	1.21456	0.193083	1.98399	0.0589538	0.639468	-3.95229
chr2	159712457	159771027	+	ENSG00000136536.15	protein_coding	MARCHF7	64844	membrane associated ring-CH-type finger 7	AXO|AXOT|MARCH-VII|MARCH7|RNF177	6288	0.218426	7.00025	1.98312	0.0590564	0.639468	-5.40065
chr16	70246778	70251940	-	ENSG00000223496.3	protein_coding	EXOSC6	118460	exosome component 6	EAP4|MTR3|Mtr3p|hMtr3p|p11	5163	-0.325407	6.21542	-1.99193	0.0590736	0.639468	-5.30009
chr5	6599239	6633291	-	ENSG00000037474.15	protein_coding	NSUN2	54888	NOP2/Sun RNA methyltransferase 2	MISU|MRT5|SAKI|TRM4	5506	-0.250644	7.11316	-1.98128	0.0592757	0.639468	-5.4149
chr15	42158701	42208307	-	ENSG00000166887.16	protein_coding	VPS39	23339	VPS39 subunit of HOPS complex	TLP|VAM6|hVam6p	8345	-0.154577	7.76842	-1.98029	0.0593928	0.639468	-5.4485
chr19	48445841	48457022	+	ENSG00000105447.13	protein_coding	GRWD1	83743	glutamate rich WD repeat containing 1	CDW4|GRWD|RRB1|WDR28	5627	0.358829	4.80638	1.98012	0.0594132	0.639468	-5.07335
chr12	6693792	6700800	-	ENSG00000139200.13	protein_coding	PIANP	196500	PILR alpha associated neural protein	C12orf53|LEDA1|PANP|leda-1	3266	0.694023	1.4528	1.98001	0.0594261	0.639468	-4.20412
chr10	6427143	6580301	-	ENSG00000065675.15	protein_coding	PRKCQ	5588	protein kinase C theta	PRKCT|nPKC-theta	3295	-0.183401	7.0358	-1.97979	0.0594529	0.639468	-5.41123
chrX	118974614	119018355	+	ENSG00000175556.17	protein_coding	LONRF3	79836	LON peptidase N-terminal domain and ring finger 3	RNF127	4041	-0.906512	1.4848	-1.97975	0.0594572	0.639468	-4.18055
chr2	135905881	135986100	-	ENSG00000115866.11	protein_coding	DARS1	1615	aspartyl-tRNA synthetase 1	DARS|HBSL|aspRS	4752	-0.177913	6.54661	-1.97921	0.0595214	0.639468	-5.36852
chrX	47217860	47229997	+	ENSG00000102225.16	protein_coding	CDK16	5127	cyclin dependent kinase 16	PCTAIRE|PCTAIRE1|PCTGAIRE|PCTK1	6531	-0.244347	6.15997	-1.97911	0.0595332	0.639468	-5.33725
chr1	225401502	225428925	-	ENSG00000143815.15	protein_coding	LBR	3930	lamin B receptor	C14SR|DHCR14B|LMN2R|PHA|PHASK|TDRD18	5710	0.167686	7.1414	1.97897	0.0595509	0.639468	-5.41914
chr8	143857324	143878467	-	ENSG00000261150.3	protein_coding	EPPK1	83481	epiplakin 1	EPIPL|EPIPL1	16005	0.463186	5.01284	1.99956	0.059573	0.639468	-5.09027
chr16	88803789	88809258	+	ENSG00000167513.9	protein_coding	CDT1	81620	chromatin licensing and DNA replication factor 1	DUP|RIS2	2760	-1.6992	-0.371067	-1.97833	0.0596267	0.639468	-3.93288
chr11	60971680	61020377	+	ENSG00000013725.14	protein_coding	CD6	923	CD6 molecule	TP120	5958	0.18019	9.65304	1.97806	0.0596592	0.639468	-5.48408
chr10	73995193	74121363	+	ENSG00000035403.18	protein_coding	VCL	7414	vinculin	CMD1W|CMH15|HEL114|MV|MVCL	9992	0.32871	5.49171	1.98348	0.0597153	0.639468	-5.25992
chr12	110124335	110218793	+	ENSG00000122970.16	protein_coding	IFT81	28981	intraflagellar transport 81	CDV-1|CDV-1R|CDV1|CDV1R|DV1|SRTD19	7001	0.726532	1.42813	1.97567	0.0599453	0.639468	-4.16589
chr20	36236459	36270918	+	ENSG00000131043.12	protein_coding	AAR2	25980	AAR2 splicing factor	C20orf4|CGI-23	3101	0.265166	5.04669	1.97479	0.0600521	0.639468	-5.15391
chr19	44417519	44448578	-	ENSG00000278318.5	protein_coding	ZNF229	7772	zinc finger protein 229	-	5500	0.587472	2.28814	1.97466	0.060067	0.639468	-4.39662
chrX	51406948	51408843	+	ENSG00000187690.4	protein_coding	EZHIP	340602	EZH inhibitory protein	CATACOMB|CXorf67|KIP75	1896	0.787599	1.19986	1.97323	0.0602397	0.639468	-4.18003
chr22	19479457	19520612	+	ENSG00000093009.11	protein_coding	CDC45	8318	cell division cycle 45	CDC45L|CDC45L2|MGORS7|PORC-PI-1	2978	1.6437	-1.05237	1.97313	0.0602521	0.639468	-3.91608
chr19	55600022	55603138	+	ENSG00000171443.7	protein_coding	ZNF524	147807	zinc finger protein 524	-	1441	0.408624	4.02433	1.97276	0.060296	0.639468	-4.91216
chr19	896503	913245	-	ENSG00000198858.10	protein_coding	R3HDM4	91300	R3H domain containing 4	C19orf22	2957	-0.187534	7.67269	-1.97274	0.0602988	0.639468	-5.45464
chr7	44044640	44069456	+	ENSG00000136279.21	protein_coding	DBNL	28988	drebrin like	ABP1|HIP-55|HIP55|SH3P7	12587	-0.200651	8.27407	-1.97187	0.060404	0.639468	-5.47531
chr22	38685543	38701556	-	ENSG00000100221.10	protein_coding	JOSD1	9929	Josephin domain containing 1	dJ508I15.2	4326	-0.27889	6.72006	-1.97508	0.0604962	0.639468	-5.39705
chr2	186486253	186509361	+	ENSG00000065548.18	protein_coding	ZC3H15	55854	zinc finger CCCH-type containing 15	HT010|LEREPO4|MSTP012	3026	-0.234371	6.69319	-1.97108	0.0604992	0.639468	-5.38964
chr19	35319261	35347361	+	ENSG00000012124.17	protein_coding	CD22	933	CD22 molecule	SIGLEC-2|SIGLEC2	6165	-1.35891	1.18424	-1.99168	0.0605524	0.639468	-4.18194
chr10	73436433	73496024	-	ENSG00000107758.16	protein_coding	PPP3CB	5532	protein phosphatase 3 catalytic subunit beta	CALNA2|CALNB|CNA2|PP2Bbeta	5089	0.188142	6.19641	1.97002	0.060628	0.639468	-5.35152
chr19	33080899	33130542	+	ENSG00000076650.7	protein_coding	GPATCH1	55094	G-patch domain containing 1	ECGP|GPATC1	4469	-0.244525	5.07166	-1.96984	0.0606496	0.639468	-5.17222
chr1	184790724	184974508	-	ENSG00000135842.17	protein_coding	NIBAN1	116496	niban apoptosis regulator 1	C1orf24|FAM129A|GIG39|NIBAN	8330	0.721727	2.42833	1.97478	0.0607155	0.639468	-4.53641
chr1	180912897	180951614	+	ENSG00000135835.12	protein_coding	KIAA1614	57710	KIAA1614	-	10452	-0.539025	1.68407	-1.96898	0.0607543	0.639468	-4.32558
chr18	74073353	74147843	-	ENSG00000141665.13	protein_coding	FBXO15	201456	F-box protein 15	FBX15	6223	0.582312	1.77051	1.96887	0.0607677	0.639468	-4.30241
chr19	51367098	51369003	-	ENSG00000160318.6	protein_coding	CLDND2	125875	claudin domain containing 2	-	1156	1.63713	-1.30599	1.96862	0.0607983	0.639468	-3.93172
chr15	68206992	68257211	-	ENSG00000128973.13	protein_coding	CLN6	54982	CLN6 transmembrane ER protein	CLN4A|HsT18960|nclf	7344	0.354356	4.11007	1.9684	0.0608251	0.639468	-4.93329
chr1	53242364	53328469	-	ENSG00000157193.18	protein_coding	LRP8	7804	LDL receptor related protein 8	APOER2|HSZ75190|LRP-8|MCI1	19668	-0.356504	4.12477	-1.9681	0.0608609	0.639468	-4.97087
chr16	10326434	10483638	+	ENSG00000166669.13	protein_coding	ATF7IP2	80063	activating transcription factor 7 interacting protein 2	MCAF2	6391	-0.277736	6.67056	-1.97075	0.0608864	0.639468	-5.38833
chr12	4487735	4538508	-	ENSG00000047621.12	protein_coding	C12orf4	57102	chromosome 12 open reading frame 4	-	4932	-0.273867	4.42288	-1.96778	0.0609003	0.639468	-5.02303
chr12	132918306	132956306	-	ENSG00000196458.11	protein_coding	ZNF605	100289635	zinc finger protein 605	-	10826	0.283287	5.62174	1.96737	0.0609498	0.639468	-5.25649
chr4	4267701	4290154	-	ENSG00000145220.14	protein_coding	LYAR	55646	Ly1 antibody reactive	ZC2HC2|ZLYAR	2304	0.310326	4.38831	1.9665	0.0610558	0.639468	-5.02832
chr1	85649417	85708433	-	ENSG00000117174.11	protein_coding	ZNHIT6	54680	zinc finger HIT-type containing 6	BCD1|C1orf181|NY-BR-75	6203	-0.21594	5.69801	-1.96632	0.0610783	0.639468	-5.26062
chr5	140107777	140125619	+	ENSG00000185129.8	protein_coding	PURA	5813	purine rich element binding protein A	MRD31|PUR-ALPHA|PUR1|PURALPHA	12519	0.289579	5.73534	1.96599	0.0611181	0.639468	-5.28371
chr17	50375059	50397523	-	ENSG00000108829.10	protein_coding	LRRC59	55379	leucine rich repeat containing 59	PRO1855|p34	4540	0.302963	4.66027	1.96492	0.0612495	0.639468	-5.05924
chr3	69019827	69052339	-	ENSG00000144747.17	protein_coding	TMF1	7110	TATA element modulatory factor 1	ARA160|TMF	7911	-0.22712	6.76546	-1.96476	0.0612694	0.639468	-5.41613
chr19	43646095	43670547	-	ENSG00000011422.12	protein_coding	PLAUR	5329	plasminogen activator, urokinase receptor	CD87|U-PAR|UPAR|URKR	4457	-1.00347	0.417402	-1.96446	0.0613063	0.639468	-4.09279
chr10	43556344	43574618	-	ENSG00000196793.13	protein_coding	ZNF239	8187	zinc finger protein 239	HOK-2|MOK2	2509	-0.448743	3.05016	-1.96434	0.0613201	0.639468	-4.672
chr2	46490750	46542577	-	ENSG00000250565.7	protein_coding	ATP6V1E2	90423	ATPase H+ transporting V1 subunit E2	ATP6E1|ATP6EL2|ATP6V1EL2|VMA4	5303	0.291047	4.2754	1.96429	0.0613269	0.639468	-4.99651
chr12	120687149	120701859	+	ENSG00000110917.8	protein_coding	MLEC	9761	malectin	KIAA0152	6438	0.209866	6.12447	1.96365	0.0614053	0.639468	-5.36164
chr6	75749192	75919537	+	ENSG00000196586.16	protein_coding	MYO6	4646	myosin VI	DFNA22|DFNB37	10727	1.35235	-0.279354	1.96302	0.0614822	0.639468	-3.99941
chr5	147585438	147782775	-	ENSG00000176049.16	protein_coding	JAKMIP2	9832	janus kinase and microtubule interacting protein 2	JAMIP2|NECC1	9203	0.617871	2.38407	1.96156	0.0616619	0.639468	-4.43095
chr20	35953617	35959472	-	ENSG00000171222.10	protein_coding	SCAND1	51282	SCAN domain containing 1	RAZ1|SDP1	1996	-0.278563	5.41161	-1.96111	0.0617176	0.639468	-5.23619
chr5	134758771	134855133	+	ENSG00000145833.16	protein_coding	DDX46	9879	DEAD-box helicase 46	PRPF5|Prp5	9205	0.149694	7.53526	1.96072	0.0617654	0.639468	-5.47254
chr16	3500976	3539048	+	ENSG00000103351.13	protein_coding	CLUAP1	23059	clusterin associated protein 1	CFAP22|FAP22|IFT38	7746	0.24651	5.75273	1.96041	0.0618032	0.639468	-5.31602
chr2	26308173	26346817	-	ENSG00000173567.15	protein_coding	ADGRF3	165082	adhesion G protein-coupled receptor F3	GPR113|PGR23	5761	0.447095	2.97005	1.96041	0.0618041	0.639468	-4.63814
chr12	57475445	57517569	+	ENSG00000166986.15	protein_coding	MARS1	4141	methionyl-tRNA synthetase 1	CMT2U|ILFS2|ILLD|MARS|METRS|MRS|MTRNS|SPG70	7028	0.162574	7.52687	1.96039	0.0618068	0.639468	-5.47351
chr15	90001324	90082206	+	ENSG00000140548.10	protein_coding	ZNF710	374655	zinc finger protein 710	-	5004	0.284447	4.53944	1.95983	0.0618752	0.639468	-5.06292
chr7	86876906	87059654	-	ENSG00000164659.15	protein_coding	ELAPOR2	222223	endosome-lysosome associated apoptosis and autophagy regulator family member 2	EIG121L|KIAA1324L	8070	0.872644	3.56152	2.00149	0.0618847	0.639468	-4.7402
chr10	95711779	95877266	+	ENSG00000138185.20	protein_coding	ENTPD1	953	ectonucleoside triphosphate diphosphohydrolase 1	ATPDase|CD39|NTPDase-1|SPG64	14344	-0.369912	4.58081	-1.95972	0.0618896	0.639468	-5.05179
chr7	99416739	99466163	-	ENSG00000106246.18	protein_coding	PTCD1	26024	pentatricopeptide repeat domain 1	-	5687	-0.332439	3.99262	-1.95935	0.0619347	0.639468	-4.89485
chr14	23298790	23311751	+	ENSG00000129473.10	protein_coding	BCL2L2	599	BCL2 like 2	BCL-W|BCL2-L-2|BCLW|PPP1R51	4110	0.592918	2.5608	1.95869	0.062016	0.639468	-4.53175
chr9	131258076	131276510	-	ENSG00000126882.13	protein_coding	FAM78A	286336	family with sequence similarity 78 member A	C9orf59	5462	0.197829	8.0898	1.9583	0.0620651	0.639468	-5.49691
chr2	99545419	100192428	-	ENSG00000144218.19	protein_coding	AFF3	3899	AF4/FMR2 family member 3	LAF4|MLLT2-like	15660	-0.293945	5.05534	-1.95821	0.0620763	0.639468	-5.15314
chrX	55484616	55489202	-	ENSG00000247746.4	protein_coding	USP51	158880	ubiquitin specific peptidase 51	-	4407	-0.511628	2.17931	-1.95665	0.0622693	0.640252	-4.44539
chr19	56567468	56588911	+	ENSG00000197016.12	protein_coding	ZNF470	388566	zinc finger protein 470	CZF-1	9670	0.461793	3.81564	1.95694	0.0623991	0.640252	-4.88866
chr17	59952240	59964761	-	ENSG00000189050.16	protein_coding	RNFT1	51136	ring finger protein, transmembrane 1	PTD016	3399	-0.222925	5.15133	-1.95557	0.0624033	0.640252	-5.19284
chr3	160256986	160399880	-	ENSG00000068885.15	protein_coding	IFT80	57560	intraflagellar transport 80	ATD2|FAP167|SRTD2|WDR56	7080	0.201188	5.83936	1.95554	0.0624077	0.640252	-5.31207
chr3	190514051	190659750	+	ENSG00000196083.10	protein_coding	IL1RAP	3556	interleukin 1 receptor accessory protein	C3orf13|IL-1RAcP|IL1R3	11558	-0.324825	3.61626	-1.95541	0.0624239	0.640252	-4.8241
chr12	121712752	121783001	+	ENSG00000188735.13	protein_coding	TMEM120B	144404	transmembrane protein 120B	-	8449	-0.211891	5.00304	-1.95309	0.0627127	0.641481	-5.17581
chr11	1752755	1764573	-	ENSG00000117984.14	protein_coding	CTSD	1509	cathepsin D	CLN10|CPSD|HEL-S-130P	3079	0.207114	5.87731	1.95252	0.062784	0.641481	-5.34754
chr12	56595596	56636816	-	ENSG00000076108.11	protein_coding	BAZ2A	11176	bromodomain adjacent to zinc finger domain 2A	TIP5|WALp3	10918	0.167249	8.57824	1.95207	0.0628404	0.641481	-5.51826
chr1	205083129	205084460	-	ENSG00000174529.7	protein_coding	TMEM81	388730	transmembrane protein 81	HC3107|KVLA2788|UNQ2788	1332	0.938976	0.918047	1.95162	0.0628973	0.641481	-4.16856
chr19	34677639	34686397	+	ENSG00000089335.21	protein_coding	ZNF302	55900	zinc finger protein 302	HSD16|MST154|MSTP154|ZNF135L|ZNF140L|ZNF327	5032	-0.303858	6.66109	-1.95864	0.0631539	0.641481	-5.41342
chr10	27154824	27187953	+	ENSG00000120539.15	protein_coding	MASTL	84930	microtubule associated serine/threonine kinase like	GREATWALL|GW|GWL|MAST-L|THC2	4660	0.342269	4.28711	1.94932	0.063186	0.641481	-5.01776
chr9	137551879	137552555	+	ENSG00000182154.8	protein_coding	MRPL41	64975	mitochondrial ribosomal protein L41	BMRP|MRP-L27|MRPL27|PIG3|RPML27	582	-0.235228	5.19277	-1.94901	0.0632244	0.641481	-5.21766
chr1	153543613	153550136	-	ENSG00000196154.12	protein_coding	S100A4	6275	S100 calcium binding protein A4	18A2|42A|CAPL|FSP1|MTS1|P9KA|PEL98	946	0.39456	5.46621	1.96731	0.0633089	0.641481	-5.2733
chr19	10305427	10316009	-	ENSG00000167807.15	protein_coding	AC011511.1	NA	NA	NA	2090	-0.97795	0.40015	-1.94745	0.0634219	0.641481	-4.09749
chr4	119212587	119295517	+	ENSG00000145390.11	protein_coding	USP53	54532	ubiquitin specific peptidase 53	-	11950	-0.656648	6.54173	-2.00575	0.0634832	0.641481	-5.34068
chr15	89305198	89334861	-	ENSG00000140521.16	protein_coding	POLG	5428	DNA polymerase gamma, catalytic subunit	MDP1|MIRAS|MTDPS4A|MTDPS4B|PEO|POLG1|POLGA|SANDO|SCAE	7699	0.197969	7.32821	1.94668	0.0635188	0.641481	-5.49147
chrX	120625674	120630054	-	ENSG00000171155.8	protein_coding	C1GALT1C1	29071	C1GALT1 specific chaperone 1	C1GALT2|C38H2-L1|COSMC|HSPC067|MST143|TNPS	1808	0.549182	3.40976	1.94921	0.0636531	0.641481	-4.78366
chr3	98579446	98593648	-	ENSG00000080819.9	protein_coding	CPOX	1371	coproporphyrinogen oxidase	COX|CPO|CPX|HARPO|HCP	3157	0.277919	4.76037	1.94525	0.0636991	0.641481	-5.13451
chr16	67227103	67229278	+	ENSG00000168701.19	protein_coding	TMEM208	29100	transmembrane protein 208	HSPC171	1787	-0.434982	3.44876	-1.94507	0.063722	0.641481	-4.82924
chr21	41167801	41282530	+	ENSG00000182240.16	protein_coding	BACE2	25825	beta-secretase 2	AEPLC|ALP56|ASP1|ASP21|BAE2|CDA13|CEAP1|DRAP	9631	1.35539	-0.226808	1.94478	0.0637593	0.641481	-3.99948
chr19	12224686	12294887	-	ENSG00000197857.14	protein_coding	ZNF44	51710	zinc finger protein 44	GIOT-2|KOX7|ZNF|ZNF504|ZNF55|ZNF58	6065	-0.28252	6.52247	-1.94895	0.0637702	0.641481	-5.4244
chr11	126269055	126278131	+	ENSG00000110074.11	protein_coding	FOXRED1	55572	FAD dependent oxidoreductase domain containing 1	FP634|H17|MC1DN19	5657	0.205256	5.11535	1.94442	0.063805	0.641481	-5.22586
chr9	37422666	37436990	+	ENSG00000137106.18	protein_coding	GRHPR	9380	glyoxylate and hydroxypyruvate reductase	GLXR|GLYD|PH2	7226	0.266651	5.27294	1.9439	0.0638711	0.641481	-5.25778
chr19	7382834	7470241	+	ENSG00000268861.7	protein_coding	AC008878.3	NA	NA	NA	3265	0.452052	3.52288	1.94367	0.0639	0.641481	-4.84111
chr1	117606048	117628389	+	ENSG00000183508.5	protein_coding	TENT5C	54855	terminal nucleotidyltransferase 5C	FAM46C	5654	-1.33654	3.34513	-2.00114	0.0639477	0.641481	-4.65766
chr8	140511311	140517154	+	ENSG00000104472.10	protein_coding	CHRAC1	54108	chromatin accessibility complex subunit 1	CHARC1|CHARC15|CHRAC-1|CHRAC-15|CHRAC15|YCL1	3305	-0.199511	4.91692	-1.94278	0.0640132	0.641481	-5.18524
chr1	162790702	162812817	+	ENSG00000132196.15	protein_coding	HSD17B7	51478	hydroxysteroid 17-beta dehydrogenase 7	PRAP|SDR37C1	4778	0.287451	4.06616	1.94215	0.0640932	0.641481	-4.9753
chr3	123201927	123274136	+	ENSG00000121542.12	protein_coding	SEC22A	26984	SEC22 homolog A, vesicle trafficking protein	SEC22L2	4704	0.290245	3.97116	1.94197	0.0641167	0.641481	-4.91772
chr6	35213956	35253079	+	ENSG00000146197.9	protein_coding	SCUBE3	222663	signal peptide, CUB domain and EGF like domain containing 3	CEGF3	7819	1.06705	0.201828	1.94146	0.0641818	0.641481	-4.04038
chr2	121337776	121649476	-	ENSG00000074054.19	protein_coding	CLASP1	23332	cytoplasmic linker associated protein 1	MAST1	10941	-0.211033	6.77845	-1.94123	0.0642114	0.641481	-5.46304
chr3	32951644	32956349	+	ENSG00000183813.7	protein_coding	CCR4	1233	C-C motif chemokine receptor 4	CC-CKR-4|CD194|CKR4|CMKBR4|ChemR13|HGCN:14099|K5-5	3025	-1.23726	1.08526	-1.95336	0.0642311	0.641481	-4.22084
chr7	44748581	44769881	+	ENSG00000122515.15	protein_coding	ZMIZ2	83637	zinc finger MIZ-type containing 2	NET27|TRAFIP20|ZIMP7|hZIMP7	7354	-0.187993	7.70197	-1.94059	0.0642927	0.641481	-5.51497
chr7	150243916	150323725	-	ENSG00000106526.10	protein_coding	ACTR3C	653857	actin related protein 3C	ARP11	6460	0.923894	0.699579	1.94021	0.0643416	0.641481	-4.11127
chr9	35104112	35116341	-	ENSG00000005238.20	protein_coding	FAM214B	80256	family with sequence similarity 214 member B	KIAA1539	6375	0.444131	3.19732	1.94019	0.0643436	0.641481	-4.7912
chr16	84476355	84554033	-	ENSG00000140950.16	protein_coding	MEAK7	57707	MTOR associated protein, eak-7 homolog	KIAA1609|TLDC1|mEAK-7	8157	0.366833	3.78095	1.94008	0.0643576	0.641481	-4.9119
chr2	264140	278283	+	ENSG00000143727.16	protein_coding	ACP1	52	acid phosphatase 1	HAAP|LMW-PTP|LMWPTP	4160	-0.153115	6.92463	-1.94003	0.0643636	0.641481	-5.47327
chr11	17208153	17349980	+	ENSG00000070081.17	protein_coding	NUCB2	4925	nucleobindin 2	HEL-S-109|NEFA	9025	0.154725	7.45977	1.93988	0.0643838	0.641481	-5.50125
chr1	63367575	63438553	+	ENSG00000088035.18	protein_coding	ALG6	29929	ALG6 alpha-1,3-glucosyltransferase	CDG1C	5487	0.224107	5.04824	1.93985	0.0643878	0.641481	-5.17918
chr5	108747841	109196841	+	ENSG00000151422.13	protein_coding	FER	2241	FER tyrosine kinase	PPP1R74|TYK3|p94-Fer	13595	-0.30571	4.4888	-1.93954	0.0644267	0.641481	-5.0676
chr19	4791734	4801273	+	ENSG00000141965.5	protein_coding	FEM1A	55527	fem-1 homolog A	EPRAP	9540	-0.523921	2.68725	-1.93938	0.0644472	0.641481	-4.64495
chr3	57293699	57544344	-	ENSG00000174844.14	protein_coding	DNAH12	201625	dynein axonemal heavy chain 12	DHC3|DLP12|DLP3|DNAH12L|DNAH7L|DNAHC12|DNAHC3|DNHD2|HDHC3|HL-19|HL19	13275	-1.29263	0.106435	-1.93682	0.0647764	0.644214	-4.0251
chr16	87949244	88077318	+	ENSG00000172530.20	protein_coding	BANP	54971	BTG3 associated nuclear protein	BEND1|SMAR1|SMARBP1	8154	0.227878	4.85861	1.93629	0.0648438	0.644341	-5.16459
chr1	109548615	109600195	+	ENSG00000065135.12	protein_coding	GNAI3	2773	G protein subunit alpha i3	87U6|ARCND1	9044	0.21606	5.69425	1.9341	0.0651264	0.64621	-5.32666
chr1	19074510	19210266	-	ENSG00000127481.15	protein_coding	UBR4	23352	ubiquitin protein ligase E3 component n-recognin 4	RBAF600|ZUBR1|p600	24661	0.170091	8.8913	1.93328	0.0652327	0.64621	-5.55599
chr3	170357678	170396835	+	ENSG00000136603.14	protein_coding	SKIL	6498	SKI like proto-oncogene	SNO|SnoA|SnoI|SnoN	7782	-0.331876	4.49116	-1.93301	0.0652677	0.64621	-5.04838
chr8	73420369	73747708	-	ENSG00000040341.18	protein_coding	STAU2	27067	staufen double-stranded RNA binding protein 2	39K2|39K3	8964	-0.278424	4.56857	-1.93273	0.0653039	0.64621	-5.11861
chr11	117800844	117828698	-	ENSG00000137731.14	protein_coding	FXYD2	486	FXYD domain containing ion transport regulator 2	ATP1G1|HOMG2	5608	1.17093	0.11456	1.93241	0.0653456	0.64621	-4.05487
chr2	74505043	74507695	-	ENSG00000115289.14	protein_coding	PCGF1	84759	polycomb group ring finger 1	2010002K04Rik|NSPC1|RNF3A-2|RNF68	1744	0.409146	3.38851	1.93209	0.0653869	0.64621	-4.81997
chr4	163494442	163520539	+	ENSG00000198498.10	protein_coding	TMA16	55319	translation machinery associated 16 homolog	C4orf43	3406	-0.360002	3.41418	-1.9317	0.0654367	0.64621	-4.81167
chr3	129167827	129183922	-	ENSG00000169714.17	protein_coding	CNBP	7555	CCHC-type zinc finger nucleic acid binding protein	CNBP1|DM2|PROMM|RNF163|ZCCHC22|ZNF9	3584	-0.157831	8.56166	-1.93056	0.0655852	0.64621	-5.55401
chr12	47075707	47079951	-	ENSG00000139211.6	protein_coding	AMIGO2	347902	adhesion molecule with Ig like domain 2	ALI1|AMIGO-2|DEGA	3956	0.321863	5.85193	1.93799	0.0656343	0.64621	-5.36959
chr1	37806979	37809454	+	ENSG00000197982.14	protein_coding	C1orf122	127687	chromosome 1 open reading frame 122	ALAESM	2231	0.35396	3.91801	1.92977	0.0656877	0.64621	-4.91532
chr14	77457870	77469472	+	ENSG00000100591.8	protein_coding	AHSA1	10598	activator of HSP90 ATPase activity 1	AHA1|C14orf3|hAha1|p38	2944	0.289791	5.98185	1.93243	0.0657859	0.64621	-5.4074
chrX	150692971	150765108	+	ENSG00000063601.17	protein_coding	MTMR1	8776	myotubularin related protein 1	-	6328	-0.16718	7.02747	-1.92901	0.0657877	0.64621	-5.49872
chrX	77910656	78050395	+	ENSG00000165240.20	protein_coding	ATP7A	538	ATPase copper transporting alpha	DSMAX|MK|MNK|SMAX3	10920	0.277291	4.96297	1.92889	0.0658033	0.64621	-5.19485
chr1	155308748	155320666	+	ENSG00000160752.15	protein_coding	FDPS	2224	farnesyl diphosphate synthase	FPPS|FPS|POROK9	3718	0.20847	5.41981	1.92789	0.0659336	0.64621	-5.32484
chr10	30309801	30374448	-	ENSG00000107951.15	protein_coding	MTPAP	55149	mitochondrial poly(A) polymerase	PAPD1|SPAX4|TENT6	8341	-0.201379	5.291	-1.92771	0.0659574	0.64621	-5.26094
chr3	126607059	126655124	-	ENSG00000197763.18	protein_coding	TXNRD3	114112	thioredoxin reductase 3	TGR|TR2|TR2IT1|TRXR3|TXNRD3IT1|TXNRD3NB|TXNRD3NT1	3017	0.520716	2.77257	1.92769	0.0659599	0.64621	-4.60674
chr16	28931965	28939342	+	ENSG00000177455.15	protein_coding	CD19	930	CD19 molecule	B4|CVID3	2681	-1.01566	0.0501421	-1.92718	0.0660261	0.64621	-4.08814
chr17	17212212	17237188	-	ENSG00000154803.13	protein_coding	FLCN	201163	folliculin	BHD|DENND8B|FLCL	9786	0.200521	5.80607	1.9271	0.0660371	0.64621	-5.38659
chr16	396725	410367	+	ENSG00000103202.13	protein_coding	NME4	4833	NME/NM23 nucleoside diphosphate kinase 4	NDPK-D|NM23H4|nm23-H4	3665	-0.237161	5.20016	-1.92606	0.0661725	0.64621	-5.28139
chr11	62856102	62888875	+	ENSG00000168003.17	protein_coding	SLC3A2	6520	solute carrier family 3 member 2	4F2|4F2HC|4T2HC|CD98|CD98HC|MDU1|NACAE	5154	-0.22424	6.54193	-1.92577	0.0662106	0.64621	-5.46028
chr9	133636363	133659329	+	ENSG00000123454.12	protein_coding	DBH	1621	dopamine beta-hydroxylase	DBM|ORTHYP1	2746	0.34117	4.3846	1.92559	0.0662344	0.64621	-5.08043
chr8	133454848	133571940	-	ENSG00000008513.16	protein_coding	ST3GAL1	6482	ST3 beta-galactoside alpha-2,3-sialyltransferase 1	Gal-NAc6S|SIAT4A|SIATFL|ST3GalA|ST3GalA.1|ST3GalIA|ST3GalIA,1|ST3O	8852	0.211189	8.65373	1.92549	0.066247	0.64621	-5.5653
chr3	52254434	52288020	-	ENSG00000164091.12	protein_coding	WDR82	80335	WD repeat domain 82	MST107|MSTP107|PRO2730|PRO34047|SWD2|TMEM113|WDR82A	5719	0.172103	8.38264	1.92483	0.0663341	0.64621	-5.56159
chr15	76347904	76905444	-	ENSG00000140386.13	protein_coding	SCAPER	49855	S-phase cyclin A associated protein in the ER	IDDRP|MSTP063|ZNF291|Zfp291	11610	-0.294673	5.1422	-1.92473	0.0663468	0.64621	-5.25374
chr1	31629866	31644896	-	ENSG00000162517.13	protein_coding	PEF1	553115	penta-EF-hand domain containing 1	ABP32|PEF1A	2223	-0.251257	5.19856	-1.92329	0.066537	0.647011	-5.28218
chr5	150485818	150558211	+	ENSG00000070614.15	protein_coding	NDST1	3340	N-deacetylase and N-sulfotransferase 1	HSST|MRT46|NST1	9510	0.564981	1.95096	1.92327	0.0665388	0.647011	-4.52465
chr16	31471585	31477960	+	ENSG00000140682.19	protein_coding	TGFB1I1	7041	transforming growth factor beta 1 induced transcript 1	ARA55|HIC-5|HIC5|TSC-5	5403	-1.53731	-0.8103	-1.92183	0.0667284	0.648321	-4.01671
chr2	215360440	215436073	-	ENSG00000115414.20	protein_coding	FN1	2335	fibronectin 1	CIG|ED-B|FINC|FN|FNZ|GFND|GFND2|LETS|MSF|SMDCF	17216	-0.442529	2.91567	-1.92141	0.0667844	0.648331	-4.6637
chr12	123383773	123409353	+	ENSG00000183955.13	protein_coding	KMT5A	387893	lysine methyltransferase 5A	PR-Set7|PR/SET07|SET07|SET8|SETD8	4574	-0.269845	4.35539	-1.92051	0.0669036	0.648768	-5.10432
chr11	43880811	43920274	+	ENSG00000166199.13	protein_coding	ALKBH3	221120	alkB homolog 3, alpha-ketoglutarate dependent dioxygenase	ABH3|DEPC-1|DEPC1|PCA1|hABH3	2380	-0.280475	4.28677	-1.91861	0.067155	0.648768	-5.06805
chr8	66562175	66614247	-	ENSG00000185697.16	protein_coding	MYBL1	4603	MYB proto-oncogene like 1	A-MYB|AMYB	7239	0.534829	3.68747	1.93151	0.067331	0.648768	-4.96963
chr1	156147366	156177752	+	ENSG00000196189.13	protein_coding	SEMA4A	64218	semaphorin 4A	CORD10|RP35|SEMAB|SEMB	6771	-0.864233	0.564314	-1.91702	0.0673664	0.648768	-4.13615
chr5	134371469	134392108	+	ENSG00000119048.8	protein_coding	UBE2B	7320	ubiquitin conjugating enzyme E2 B	E2-17kDa|HHR6B|HR6B|RAD6B|UBC2	3117	0.209487	5.86713	1.91695	0.0673754	0.648768	-5.38287
chr2	241106099	241150264	-	ENSG00000115687.14	protein_coding	PASK	23178	PAS domain containing serine/threonine kinase	PASKIN|STK37	10665	-0.515856	7.44067	-1.9682	0.0673981	0.648768	-5.48108
chr8	122781655	122974510	+	ENSG00000178764.8	protein_coding	ZHX2	22882	zinc fingers and homeoboxes 2	AFR1|RAF	4453	-0.277001	6.12532	-1.91862	0.0674119	0.648768	-5.44113
chr12	109088188	109093631	-	ENSG00000189046.11	protein_coding	ALKBH2	121642	alkB homolog 2, alpha-ketoglutarate dependent dioxygenase	ABH2	2290	-0.292495	4.14321	-1.91666	0.0674141	0.648768	-5.03481
chr10	102743948	102834516	+	ENSG00000166272.18	protein_coding	WBP1L	54838	WW domain binding protein 1 like	C10orf26|OPA1L|OPAL1	7833	0.206422	5.891	1.91666	0.0674147	0.648768	-5.41292
chrX	47651796	47659180	-	ENSG00000126756.12	protein_coding	UXT	8409	ubiquitously expressed prefoldin like chaperone	ART-27|STAP1	1264	0.184754	6.37955	1.91631	0.0674616	0.648768	-5.46953
chr10	86756601	86932825	+	ENSG00000107779.14	protein_coding	BMPR1A	657	bone morphogenetic protein receptor type 1A	10q23del|ACVRLK3|ALK3|CD292|SKR5	9518	-0.709944	1.47098	-1.91618	0.0674789	0.648768	-4.3708
chr10	103493979	103592552	+	ENSG00000107954.10	protein_coding	NEURL1	9148	neuralized E3 ubiquitin protein ligase 1	NEUR1|NEURL|RNF67|bA416N2.1|neu|neu-1	4961	-0.580031	1.96745	-1.9161	0.0674895	0.648768	-4.46847
chr12	110614027	110649430	+	ENSG00000204852.16	protein_coding	TCTN1	79600	tectonic family member 1	JBTS13|TECT1	9605	0.26378	4.21356	1.91546	0.0675748	0.649059	-5.04555
chrX	72255679	72277248	-	ENSG00000198034.11	protein_coding	RPS4X	6191	ribosomal protein S4 X-linked	CCG2|DXS306|RPS4|S4|SCAR|SCR10	2930	-0.261024	10.7089	-1.92101	0.0678486	0.649169	-5.59377
chr17	58345206	58417595	-	ENSG00000285897.1	protein_coding	AC004687.2	NA	NA	NA	5828	0.562072	2.6743	1.91325	0.0678704	0.649169	-4.69037
chr2	74471986	74483408	-	ENSG00000135637.14	protein_coding	CCDC142	84865	coiled-coil domain containing 142	-	5786	0.375928	3.8696	1.91321	0.0678756	0.649169	-4.9726
chr7	107579977	107629170	+	ENSG00000075790.11	protein_coding	BCAP29	55973	B cell receptor associated protein 29	BAP29	7045	0.881039	0.824007	1.91317	0.0678805	0.649169	-4.18557
chr9	101387633	101398618	-	ENSG00000136897.8	protein_coding	MRPL50	54534	mitochondrial ribosomal protein L50	MRP-L50	3336	0.396326	4.18601	1.91303	0.0679	0.649169	-5.05144
chr19	13961530	14007039	-	ENSG00000132005.9	protein_coding	RFX1	5989	regulatory factor X1	EFC|RFX	5473	0.275785	4.8345	1.9129	0.0679165	0.649169	-5.21928
chr11	65538805	65558930	-	ENSG00000168056.16	protein_coding	LTBP3	4054	latent transforming growth factor beta binding protein 3	DASS|GPHYSD3|LTBP-3|LTBP2|STHAG6|pp6425	10673	0.233126	9.00993	1.91267	0.0680869	0.650271	-5.59233
chr21	44328944	44339402	-	ENSG00000160226.16	protein_coding	CFAP410	755	cilia and flagella associated protein 410	C21orf2|LRRC76|RDMS|SMDAX|YF5/A2	6063	0.20148	5.95184	1.91066	0.0682181	0.650997	-5.42294
chr16	19523811	19553408	+	ENSG00000103540.16	protein_coding	CCP110	9738	centriolar coiled-coil protein 110	CP110|Cep110	10142	0.254862	5.3547	1.90969	0.0683477	0.651707	-5.32201
chr12	57055643	57088063	-	ENSG00000166881.10	protein_coding	NEMP1	23306	nuclear envelope integral membrane protein 1	TMEM194|TMEM194A	5730	-0.200467	6.40717	-1.90816	0.0685555	0.653012	-5.47897
chr1	169588849	169630193	-	ENSG00000174175.17	protein_coding	SELP	6403	selectin P	CD62|CD62P|GMP140|GRMP|LECAM3|PADGEM|PSEL	3490	-0.467524	2.25181	-1.90786	0.0685953	0.653012	-4.54703
chr4	70815783	70839897	-	ENSG00000132463.14	protein_coding	GRSF1	2926	G-rich RNA sequence binding factor 1	-	7736	0.185082	6.75454	1.90641	0.068792	0.654336	-5.51469
chr1	149884459	149886652	-	ENSG00000184678.10	protein_coding	H2BC21	8349	H2B clustered histone 21	GL105|H2B|H2B.1|H2BE|H2BFQ|H2BGL105|H2BQ|HIST2H2BE	2194	1.06387	4.64879	1.96487	0.0688634	0.654336	-5.07935
chr10	44959407	44995891	+	ENSG00000107551.21	protein_coding	RASSF4	83937	Ras association domain family member 4	AD037	9481	0.858513	1.09861	1.90504	0.0689782	0.654336	-4.31885
chr15	76993359	77037475	+	ENSG00000140368.13	protein_coding	PSTPIP1	9051	proline-serine-threonine phosphatase interacting protein 1	CD2BP1|CD2BP1L|CD2BP1S|H-PIP|PAPAS|PSTPIP	4574	0.188772	6.63256	1.9047	0.0690235	0.654336	-5.51712
chr22	50263713	50270767	-	ENSG00000185386.15	protein_coding	MAPK11	5600	mitogen-activated protein kinase 11	P38B|P38BETA2|PRKM11|SAPK2|SAPK2B|p38-2|p38Beta	2688	-0.491288	3.76454	-1.90692	0.0690686	0.654336	-4.92122
chr15	101270817	101277500	-	ENSG00000131871.15	protein_coding	SELENOS	55829	selenoprotein S	AD-015|ADO15|SBBI8|SELS|SEPS1|VIMP	3758	-0.36705	3.91615	-1.90412	0.0691027	0.654336	-5.00455
chr15	49155656	49367869	+	ENSG00000156958.15	protein_coding	GALK2	2585	galactokinase 2	GK2	7343	-0.265109	4.08739	-1.90381	0.0691452	0.654336	-5.0703
chr19	58059239	58086310	+	ENSG00000176293.20	protein_coding	ZNF135	7694	zinc finger protein 135	ZNF61|ZNF78L1|pHZ-17|pT3	6418	0.589332	3.13675	1.9072	0.0692321	0.654336	-4.78092
chr3	44555193	44594173	+	ENSG00000196345.13	protein_coding	ZKSCAN7	55888	zinc finger with KRAB and SCAN domains 7	ZFP|ZNF167|ZNF448|ZNF64|ZSCAN39	4208	0.508416	2.8814	1.90316	0.0692337	0.654336	-4.77674
chr8	143574785	143578649	-	ENSG00000147813.16	protein_coding	NAPRT	93100	nicotinate phosphoribosyltransferase	NAPRT1|PP3856	2837	-0.891031	0.301967	-1.90133	0.0694835	0.654543	-4.14082
chr3	194685883	194689037	+	ENSG00000185112.6	protein_coding	FAM43A	131583	family with sequence similarity 43 member A	-	3155	0.834124	1.19047	1.90115	0.069508	0.654543	-4.33341
chr9	134025481	134034666	+	ENSG00000235106.10	protein_coding	BRD3OS	266655	BRD3 opposite strand	LINC00094|LP2477|NCRNA00094	5954	0.322808	4.44782	1.90042	0.0696076	0.654543	-5.15973
chr16	68084751	68229259	+	ENSG00000072736.19	protein_coding	NFATC3	4775	nuclear factor of activated T cells 3	NF-AT4c|NFAT4|NFATX	8806	0.242394	7.01273	1.90042	0.0696079	0.654543	-5.54901
chr11	122838500	122872643	+	ENSG00000109943.9	protein_coding	CRTAM	56253	cytotoxic and regulatory T cell molecule	CD355	2679	0.738275	3.34139	1.92613	0.0697358	0.654543	-4.83773
chr11	59636716	59669037	-	ENSG00000166889.14	protein_coding	PATL1	219988	PAT1 homolog 1, processing body mRNA decay factor	Pat1b|hPat1b	4335	0.226278	6.34524	1.89916	0.0697808	0.654543	-5.50006
chr17	45263119	45317029	-	ENSG00000006062.17	protein_coding	MAP3K14	9020	mitogen-activated protein kinase kinase kinase 14	FTDCR1B|HS|HSNIK|NIK	5668	-0.167635	6.16981	-1.8988	0.0698298	0.654543	-5.47958
chr5	142108779	142154440	+	ENSG00000131507.11	protein_coding	NDFIP1	80762	Nedd4 family interacting protein 1	N4WBP5	5747	-0.171752	8.05638	-1.8986	0.0698576	0.654543	-5.59563
chr16	57245259	57253635	+	ENSG00000102931.8	protein_coding	ARL2BP	23568	ADP ribosylation factor like GTPase 2 binding protein	BART|BART1|RP66	1994	0.340609	3.47982	1.89822	0.0699095	0.654543	-4.89471
chr2	218450251	218568351	-	ENSG00000135913.11	protein_coding	USP37	57695	ubiquitin specific peptidase 37	-	9280	0.283096	5.261	1.8978	0.0699675	0.654543	-5.32335
chr19	17405722	17433724	+	ENSG00000141971.13	protein_coding	MVB12A	93343	multivesicular body subunit 12A	CFBP|FAM125A	3280	0.317825	4.16722	1.89734	0.0700312	0.654543	-5.07878
chr17	4538897	4555386	-	ENSG00000132382.15	protein_coding	MYBBP1A	10514	MYB binding protein 1a	P160|PAP2|Pol5	5958	-0.16422	6.98242	-1.89693	0.0700874	0.654543	-5.55469
chr8	30095408	30177208	+	ENSG00000104660.19	protein_coding	LEPROTL1	23484	leptin receptor overlapping transcript like 1	HSPC112|Vps55|my047	5411	-0.222815	7.71373	-1.89673	0.070115	0.654543	-5.586
chr2	120240064	120294710	+	ENSG00000144118.14	protein_coding	RALB	5899	RAS like proto-oncogene B	-	2865	0.403269	4.39923	1.89908	0.0701179	0.654543	-5.11114
chr19	40421589	40425992	-	ENSG00000197019.5	protein_coding	SERTAD1	29950	SERTA domain containing 1	SEI1|TRIP-Br1|TRIPBR1	2084	1.58209	3.1654	1.95413	0.0701433	0.654543	-4.68625
chr14	21459020	21476960	-	ENSG00000129472.15	protein_coding	RAB2B	84932	RAB2B, member RAS oncogene family	-	3597	-0.272434	4.93338	-1.89652	0.0701435	0.654543	-5.25878
chr2	64524305	64593005	+	ENSG00000119844.15	protein_coding	AFTPH	54812	aftiphilin	Nbla10388	5767	0.201431	6.4915	1.89499	0.0703548	0.655996	-5.51107
chr4	86935002	87141054	+	ENSG00000172493.21	protein_coding	AFF1	4299	AF4/FMR2 family member 1	AF4|MLLT2|PBM1	10733	-0.305536	7.70842	-1.91143	0.0704508	0.65615	-5.57571
chr8	22089150	22104911	+	ENSG00000158863.22	protein_coding	FAM160B2	64760	family with sequence similarity 160 member B2	RAI16	8300	0.14442	7.30206	1.89407	0.0704825	0.65615	-5.5751
chrX	40049815	40177329	-	ENSG00000183337.17	protein_coding	BCOR	54880	BCL6 corepressor	ANOP2|MAA2|MCOPS2	9993	0.269059	6.15802	1.89506	0.070585	0.656585	-5.4929
chr16	20610243	20797581	+	ENSG00000005187.12	protein_coding	ACSM3	6296	acyl-CoA synthetase medium chain family member 3	SA|SAH	7510	0.363217	3.02785	1.89292	0.0706422	0.6566	-4.77122
chr22	50545899	50551023	+	ENSG00000130487.9	protein_coding	KLHDC7B	113730	kelch domain containing 7B	-	5125	-0.467668	3.66043	-1.89403	0.0707125	0.656736	-4.96062
chr3	42547969	42601080	-	ENSG00000093183.14	protein_coding	SEC22C	9117	SEC22 homolog C, vesicle trafficking protein	SEC22L3	8159	-0.173025	6.51139	-1.891	0.0709092	0.658044	-5.52577
chr11	117199370	117207464	+	ENSG00000149591.17	protein_coding	TAGLN	6876	transgelin	SM22|SM22-alpha|SMCC|TAGLN1|WS3-10	6550	-0.275302	4.86648	-1.88917	0.0711642	0.659805	-5.26803
chr11	61102489	61127852	+	ENSG00000110448.11	protein_coding	CD5	921	CD5 molecule	LEU1|T1	3127	0.225412	8.52609	1.88883	0.0712108	0.659805	-5.62746
chr19	5158495	5340803	-	ENSG00000105426.17	protein_coding	PTPRS	5802	protein tyrosine phosphatase receptor type S	PTPSIGMA|R-PTP-S|R-PTP-sigma	8565	-0.427469	3.25521	-1.8878	0.0713558	0.660629	-4.8343
chr1	1352689	1361777	-	ENSG00000162576.17	protein_coding	MXRA8	54587	matrix remodeling associated 8	ASP3	3622	0.536088	4.51449	1.91212	0.0714645	0.661117	-5.1349
chr1	45329163	45340893	-	ENSG00000132781.19	protein_coding	MUTYH	4595	mutY DNA glycosylase	MYH	5811	-0.347063	3.41241	-1.88641	0.0715495	0.661384	-4.91969
chr1	145845630	145848954	+	ENSG00000186364.12	protein_coding	NUDT17	200035	nudix hydrolase 17	-	1657	0.44915	2.93224	1.88563	0.0716595	0.661882	-4.7869
chr3	142724034	142807888	+	ENSG00000144935.15	protein_coding	TRPC1	7220	transient receptor potential cation channel subfamily C member 1	HTRP-1|TRP1	4808	-0.410143	3.39622	-1.88517	0.0717244	0.661963	-4.85901
chr1	153390032	153391073	-	ENSG00000143546.10	protein_coding	S100A8	6279	S100 calcium binding protein A8	60B8AG|CAGA|CFAG|CGLA|CP-10|L1Ag|MA387|MIF|MRP8|NIF|P8	891	2.31532	-0.0340674	1.90294	0.071943	0.663114	-4.0383
chr19	11377207	11384342	-	ENSG00000187266.14	protein_coding	EPOR	2057	erythropoietin receptor	EPO-R	3077	0.648036	2.3863	1.88348	0.0719615	0.663114	-4.56262
chr13	76880175	76886405	-	ENSG00000178695.6	protein_coding	KCTD12	115207	potassium channel tetramerization domain containing 12	C13orf2|PFET1|PFETIN	6231	-0.372447	4.32334	-1.88286	0.0720502	0.663413	-5.10736
chr21	44107373	44131181	+	ENSG00000241945.8	protein_coding	PWP2	5822	PWP2 small subunit processome component	EHOC-17|PWP2H|UTP1	6839	-0.902937	1.37399	-1.8819	0.0721858	0.664143	-4.38429
chr19	12675717	12681880	-	ENSG00000095059.16	protein_coding	DHPS	1725	deoxyhypusine synthase	DHS|DS|MIG13|NEDSSWI	2984	0.244128	4.62567	1.88018	0.0724293	0.665864	-5.20748
chr1	39692182	39763914	+	ENSG00000084072.17	protein_coding	PPIE	10450	peptidylprolyl isomerase E	CYP-33|CYP33	11124	0.546164	6.51398	1.9275	0.0726995	0.666485	-5.47862
chr12	93569814	93583487	+	ENSG00000120833.14	protein_coding	SOCS2	8835	suppressor of cytokine signaling 2	CIS2|Cish2|SOCS-2|SSI-2|SSI2|STATI2	6477	-0.531007	5.32555	-1.91555	0.0727306	0.666485	-5.30858
chr1	109399042	109426448	-	ENSG00000143106.13	protein_coding	PSMA5	5686	proteasome 20S subunit alpha 5	PSC5|ZETA	5734	0.208862	6.26814	1.87797	0.0727431	0.666485	-5.52521
chrX	48831096	48835610	-	ENSG00000102109.9	protein_coding	PCSK1N	27344	proprotein convertase subtilisin/kexin type 1 inhibitor	BigLEN|PEN|PROSAAS|SAAS|SCG8|SgVIII	1338	-0.912214	0.448919	-1.87728	0.0728409	0.666485	-4.19419
chr1	151759647	151763496	-	ENSG00000143436.11	protein_coding	MRPL9	65005	mitochondrial ribosomal protein L9	L9mt	1740	-0.256307	5.89652	-1.87705	0.0728734	0.666485	-5.46748
chr3	53867066	53882152	-	ENSG00000113812.14	protein_coding	ACTR8	93973	actin related protein 8	ARP8|INO80N|hArp8	4016	0.283784	4.87546	1.87676	0.0729155	0.666485	-5.30027
chr1	117001750	117036476	+	ENSG00000134256.12	protein_coding	CD101	9398	CD101 molecule	EWI-101|IGSF2|V7	3828	-0.595178	2.77717	-1.87613	0.0730045	0.666485	-4.70754
chr12	132144457	132152473	+	ENSG00000184967.7	protein_coding	NOC4L	79050	nucleolar complex associated 4 homolog	NET49|NOC4|UTP19	2020	0.352807	4.17002	1.87613	0.073005	0.666485	-5.12146
chr19	24033405	24129968	+	ENSG00000213096.11	protein_coding	ZNF254	9534	zinc finger protein 254	BMZF-5|HD-ZNF1|ZNF539|ZNF91L	7609	-0.304332	4.1408	-1.87601	0.0730216	0.666485	-5.07191
chr19	10221433	10231331	-	ENSG00000267534.4	protein_coding	S1PR2	9294	sphingosine-1-phosphate receptor 2	AGR16|DFNB68|EDG-5|EDG5|Gpcr13|H218|LPB2|S1P2	3643	-0.710594	0.969012	-1.8755	0.0730958	0.666485	-4.29666
chr8	124474880	124488618	+	ENSG00000170881.5	protein_coding	RNF139	11236	ring finger protein 139	HRCA1|RCA1|TRC8	3262	-0.481458	6.25801	-1.914	0.0731184	0.666485	-5.42148
chr9	136401922	136410614	-	ENSG00000165689.17	protein_coding	ENTR1	10807	endosome associated trafficking regulator 1	NY-CO-3|SDCCAG3|SDDAG3	3138	0.168951	6.45169	1.87448	0.0732414	0.66709	-5.54978
chr11	121024072	121090775	+	ENSG00000154114.12	protein_coding	TBCEL	219899	tubulin folding cofactor E like	El|LRRC35	7020	-0.272051	5.06133	-1.87227	0.073558	0.669343	-5.30552
chr3	132597270	132618967	+	ENSG00000129048.7	protein_coding	ACKR4	51554	atypical chemokine receptor 4	CC-CKR-11|CCBP2|CCR-11|CCR10|CCR11|CCRL1|CCX CKR|CCX-CKR|CKR-11|PPR1|VSHK1	2669	-0.979599	0.025062	-1.87161	0.073653	0.669343	-4.14698
chr8	127322183	127420066	+	ENSG00000212993.5	protein_coding	POU5F1B	5462	POU class 5 homeobox 1B	OCT4-PG1|OCT4PG1|OTF3C|OTF3P1|POU5F1P1|POU5F1P4|POU5FLC20|POU5FLC8	4964	-0.733084	1.39297	-1.87112	0.0737233	0.669343	-4.45749
chr7	139561570	139777998	-	ENSG00000064393.16	protein_coding	HIPK2	28996	homeodomain interacting protein kinase 2	PRO0593	15622	0.199415	7.49885	1.8711	0.0737257	0.669343	-5.62367
chr17	7884796	7912760	+	ENSG00000170004.17	protein_coding	CHD3	1107	chromodomain helicase DNA binding protein 3	Mi-2a|Mi2-ALPHA|SNIBCPS|ZFH	10335	0.158068	10.3863	1.87078	0.0737724	0.669343	-5.67396
chr22	49960768	49964072	+	ENSG00000198355.5	protein_coding	PIM3	415116	Pim-3 proto-oncogene, serine/threonine kinase	pim-3	2198	-0.433364	6.29743	-1.90358	0.0739193	0.67012	-5.47608
chr20	38748460	38772520	+	ENSG00000101442.10	protein_coding	ACTR5	79913	actin related protein 5	Arp5|INO80M	2547	0.207311	5.13873	1.86856	0.0740925	0.67012	-5.3492
chr19	36636618	36666853	-	ENSG00000197808.12	protein_coding	ZNF461	92283	zinc finger protein 461	GIOT-1|GIOT1|HZF28	4778	-0.299355	4.45417	-1.86794	0.0741826	0.67012	-5.17177
chr16	48356364	48448402	-	ENSG00000196470.12	protein_coding	SIAH1	6477	siah E3 ubiquitin protein ligase 1	SIAH1A	6688	-0.39603	3.36298	-1.86792	0.0741852	0.67012	-4.90968
chr11	57648992	57661865	+	ENSG00000172409.6	protein_coding	CLP1	10978	cleavage factor polyribonucleotide kinase subunit 1	HEAB|hClp1	2196	-0.477782	3.7243	-1.86922	0.0742399	0.67012	-4.97543
chr9	35791591	35809732	+	ENSG00000159899.15	protein_coding	NPR2	4882	natriuretic peptide receptor 2	AMDM|ANPRB|ANPb|ECDM|GC-B|GCB|GUC2B|GUCY2B|NPRB|NPRBi|SNSK	4428	0.336693	3.46906	1.86749	0.0742478	0.67012	-4.97606
chr14	91869412	91947987	-	ENSG00000140092.14	protein_coding	FBLN5	10516	fibulin 5	ADCL2|ARCL1A|ARMD3|DANCE|EVEC|FIBL-5|HNARMD|UP50	4973	-0.564464	3.70426	-1.88331	0.0742972	0.67012	-5.0129
chr16	31138926	31150083	-	ENSG00000178226.11	protein_coding	PRSS36	146547	serine protease 36	-	3673	1.25838	-0.0329925	1.86656	0.0743833	0.67012	-4.12381
chr7	897900	955407	-	ENSG00000105963.15	protein_coding	ADAP1	11033	ArfGAP with dual PH domains 1	CENTA1|GCS1L|p42IP4	5063	0.576741	2.28531	1.86588	0.0744818	0.67012	-4.6525
chr19	51077495	51084245	-	ENSG00000129437.10	protein_coding	KLK14	43847	kallikrein related peptidase 14	KLK-L6	1189	-0.817678	0.124253	-1.86577	0.0744976	0.67012	-4.17727
chr18	22798261	23026488	+	ENSG00000101773.19	protein_coding	RBBP8	5932	RB binding protein 8, endonuclease	COM1|CTIP|JWDS|RIM|SAE2|SCKL2	5078	-0.815634	1.24564	-1.86574	0.0745011	0.67012	-4.36733
chr19	57769655	57819939	+	ENSG00000083828.16	protein_coding	ZNF586	54807	zinc finger protein 586	-	5480	0.260117	5.31922	1.86548	0.0745399	0.67012	-5.38689
chr20	63639705	63657682	-	ENSG00000197457.10	protein_coding	STMN3	50861	stathmin 3	SCLIP	3029	-0.223092	8.17892	-1.86474	0.0746475	0.670267	-5.65766
chr16	3022625	3024286	-	ENSG00000103145.11	protein_coding	HCFC1R1	54985	host cell factor C1 regulator 1	HPIP	1428	-0.327071	3.2674	-1.86458	0.0746698	0.670267	-4.92581
chr12	1688574	1788674	+	ENSG00000006831.10	protein_coding	ADIPOR2	79602	adiponectin receptor 2	ACDCR2|PAQR2	5831	-0.18224	6.04787	-1.86238	0.0749913	0.672317	-5.52869
chr7	100015572	100041689	+	ENSG00000106261.17	protein_coding	ZKSCAN1	7586	zinc finger with KRAB and SCAN domains 1	KOX18|PHZ-37|ZNF139|ZNF36|ZSCAN33	10319	0.202028	7.43416	1.86194	0.0750558	0.672317	-5.63692
chr2	189441446	189475552	+	ENSG00000115368.10	protein_coding	WDR75	84128	WD repeat domain 75	NET16|UTP17	5040	-0.168466	6.90467	-1.86185	0.0750693	0.672317	-5.5965
chr16	29995715	30005793	+	ENSG00000169592.15	protein_coding	INO80E	283899	INO80 complex subunit E	CCDC95	5655	0.202219	7.41805	1.86133	0.0751447	0.672483	-5.64053
chr9	112683926	112718149	-	ENSG00000148153.14	protein_coding	INIP	58493	INTS3 and NABP interacting protein	C9orf80|HSPC043|MISE|SOSSC|SSBIP1|hSSBIP1	4336	0.352738	4.46772	1.85959	0.0754003	0.673114	-5.22643
chr9	97633668	97673748	+	ENSG00000136937.13	protein_coding	NCBP1	4686	nuclear cap binding protein subunit 1	CBP80|NCBP|Sto1	5506	0.221738	6.63021	1.85944	0.0754216	0.673114	-5.57764
chr1	46040140	46133036	-	ENSG00000117461.15	protein_coding	PIK3R3	8503	phosphoinositide-3-kinase regulatory subunit 3	p55|p55-GAMMA|p55PIK	7397	0.884913	0.337573	1.85914	0.0754666	0.673114	-4.19813
chr6	33272075	33276511	+	ENSG00000231500.7	protein_coding	RPS18	6222	ribosomal protein S18	D6S218E|HKE3|KE-3|KE3|S18	1834	0.356157	5.06177	1.8625	0.0755311	0.673114	-5.30498
chr6	159669069	159762529	-	ENSG00000112096.19	protein_coding	SOD2	6648	superoxide dismutase 2	GClnc1|IPO-B|IPOB|MNSOD|MVCD6|Mn-SOD	18144	-0.210122	6.66439	-1.85855	0.0755529	0.673114	-5.58606
chr19	46601074	46610782	+	ENSG00000160014.17	protein_coding	CALM3	808	calmodulin 3	CALM|CAM1|CAM2|CAMB|CPVT6|CaM|CaMIII|HEL-S-72|LQT16|PHKD|PHKD3	5235	0.165095	8.67023	1.85852	0.0755577	0.673114	-5.68125
chr1	203765177	203776372	+	ENSG00000122188.13	protein_coding	LAX1	54900	lymphocyte transmembrane adaptor 1	LAX	3336	0.316279	5.32359	1.86078	0.0756955	0.673833	-5.40902
chr10	95036772	95069497	-	ENSG00000138115.14	protein_coding	CYP2C8	1558	cytochrome P450 family 2 subfamily C member 8	CPC8|CYP2C8DM|CYPIIC8|MP-12/MP-20	2571	-1.15972	-0.0746804	-1.85612	0.0759113	0.674892	-4.16235
chr17	63550477	63594279	+	ENSG00000136485.15	protein_coding	DCAF7	10238	DDB1 and CUL4 associated factor 7	AN11|HAN11|SWAN-1|WDR68	6572	0.282265	6.27179	1.86144	0.0759721	0.674892	-5.56487
chr16	80597907	80804598	-	ENSG00000166446.15	protein_coding	CDYL2	124359	chromodomain Y like 2	PCCP1	8825	-0.422119	4.09837	-1.85865	0.0760966	0.674892	-5.14739
chr1	29147743	29181900	-	ENSG00000116350.17	protein_coding	SRSF4	6429	serine and arginine rich splicing factor 4	SFRS4|SRP75	8806	-0.185697	7.52897	-1.85481	0.0761051	0.674892	-5.65508
chr9	78236062	78279690	+	ENSG00000148019.14	protein_coding	CEP78	84131	centrosomal protein 78	C9orf81|CRDHL|IP63	14355	0.234222	5.90119	1.85456	0.0761425	0.674892	-5.50765
chr6	5261044	5829192	+	ENSG00000145982.13	protein_coding	FARS2	10667	phenylalanyl-tRNA synthetase 2, mitochondrial	COXPD14|FARS1|HSPC320|PheRS|SPG77|mtPheRS	4838	-0.276663	3.9852	-1.85436	0.0761719	0.674892	-5.11257
chr17	28744005	28750956	+	ENSG00000076604.15	protein_coding	TRAF4	9618	TNF receptor associated factor 4	CART1|MLN62|RNF83	4573	-0.346038	3.73195	-1.85333	0.0763246	0.674892	-5.01487
chr19	17226213	17229219	+	ENSG00000099330.9	protein_coding	OCEL1	79629	occludin/ELL domain containing 1	FWP009|S863-9	1858	-0.325095	3.93763	-1.85305	0.0763664	0.674892	-5.11688
chr2	10570754	10689987	-	ENSG00000115761.16	protein_coding	NOL10	79954	nucleolar protein 10	PQBP5	3836	-0.257998	4.61677	-1.85277	0.0764076	0.674892	-5.25643
chr13	28659104	28678959	+	ENSG00000132963.8	protein_coding	POMP	51371	proteasome maturation protein	C13orf12|HSPC014|PNAS-110|PRAAS2|UMP1	1462	-0.280387	4.53309	-1.85249	0.0764486	0.674892	-5.2099
chr1	155002630	155018522	+	ENSG00000160685.13	protein_coding	ZBTB7B	51043	zinc finger and BTB domain containing 7B	CKROX|THPOK|ZBTB15|ZFP-67|ZFP67|ZNF857B|c-KROX|hcKROX	4303	0.302346	6.46843	1.86335	0.0765211	0.674892	-5.57647
chr5	115267190	115296693	-	ENSG00000164221.13	protein_coding	CCDC112	153733	coiled-coil domain containing 112	MBC1	3149	-0.392932	3.49032	-1.85156	0.0765872	0.674892	-4.94253
chr21	44350163	44443081	+	ENSG00000142185.16	protein_coding	TRPM2	7226	transient receptor potential cation channel subfamily M member 2	EREG1|KNP3|LTRPC2|LTrpC-2|NUDT9H|NUDT9L1|TRPC7	6705	-0.5073	2.43884	-1.85134	0.0766197	0.674892	-4.74047
chr15	101621444	101652391	-	ENSG00000184277.13	protein_coding	TM2D3	80213	TM2 domain containing 3	BLP2	11894	-0.388817	5.97583	-1.87497	0.0766639	0.674892	-5.48664
chr6	109440724	109443919	+	ENSG00000135587.9	protein_coding	SMPD2	6610	sphingomyelin phosphodiesterase 2	ISC1|NSMASE|NSMASE1	2053	0.344951	3.32282	1.85099	0.0766728	0.674892	-4.97308
chr4	109815510	109824740	+	ENSG00000109534.17	protein_coding	GAR1	54433	GAR1 ribonucleoprotein	NOLA1	1964	0.371859	3.48963	1.85017	0.076794	0.675455	-4.94269
chr12	106357748	106510198	+	ENSG00000013503.10	protein_coding	POLR3B	55703	RNA polymerase III subunit B	C128|HLD8|INMAP|RPC2	4768	-0.294878	3.59436	-1.84902	0.076966	0.676342	-5.02731
chr11	47778087	47848555	-	ENSG00000030066.13	protein_coding	NUP160	23279	nucleoporin 160	NPHS19	8576	-0.183731	7.01719	-1.84848	0.0770465	0.676342	-5.63245
chr12	104986316	105074197	+	ENSG00000151131.11	protein_coding	C12orf45	121053	chromosome 12 open reading frame 45	-	25882	0.251695	4.4615	1.84779	0.0771503	0.676342	-5.2186
chr1	220094132	220148041	+	ENSG00000067704.10	protein_coding	IARS2	55699	isoleucyl-tRNA synthetase 2, mitochondrial	CAGSSS|ILERS	4135	0.181693	6.6416	1.84765	0.0771717	0.676342	-5.60753
chr1	35557473	35567274	+	ENSG00000020129.16	protein_coding	NCDN	23154	neurochondrin	-	4917	0.250825	5.64062	1.84758	0.0771815	0.676342	-5.49883
chr7	150450630	150479393	+	ENSG00000171115.4	protein_coding	GIMAP8	155038	GTPase, IMAP family member 8	IAN-9|IAN6|IAN9|IANT	4185	0.234603	7.29552	1.84789	0.0772459	0.676403	-5.65692
chr1	115641970	115698224	+	ENSG00000173218.15	protein_coding	VANGL1	81839	VANGL planar cell polarity protein 1	KITENIN|LPP2|STB2|STBM2	9045	0.432317	2.96745	1.84634	0.0773674	0.676778	-4.90314
chr6	132722787	132736935	-	ENSG00000093134.15	protein_coding	VNN3	55350	vanin 3	HSA238982	6016	-1.32174	-0.268376	-1.8459	0.077433	0.676778	-4.15825
chr17	7435435	7437679	+	ENSG00000181284.3	protein_coding	TMEM102	284114	transmembrane protein 102	CBAP	2137	0.63748	2.55032	1.84806	0.0774608	0.676778	-4.75538
chr4	163524298	164384050	-	ENSG00000145416.13	protein_coding	MARCHF1	55016	membrane associated ring-CH-type finger 1	MARCH-I|MARCH1|RNF171	10421	-0.445727	3.5241	-1.84473	0.0776105	0.677165	-4.99641
chr10	73796514	73811651	-	ENSG00000272916.5	protein_coding	AC022400.5	NA	NA	NA	5818	0.704321	0.995034	1.84466	0.07762	0.677165	-4.29515
chr2	73828916	73873659	+	ENSG00000124356.16	protein_coding	STAMBP	10617	STAM binding protein	AMSH|MICCAP	7694	-0.190516	5.7927	-1.84413	0.0776995	0.677358	-5.50256
chr19	58386400	58394806	+	ENSG00000083845.9	protein_coding	RPS5	6193	ribosomal protein S5	S5	3617	0.201758	9.87599	1.84334	0.0778186	0.67746	-5.7166
chr10	96129715	96205288	+	ENSG00000177853.14	protein_coding	ZNF518A	9849	zinc finger protein 518A	ZNF518	10891	-0.217979	6.64134	-1.843	0.0778711	0.67746	-5.60313
chr6	87152833	87265943	+	ENSG00000188994.13	protein_coding	ZNF292	23036	zinc finger protein 292	Nbla00365|ZFP292|ZN-16|Zn-15|bA393I2.3	14861	-0.186796	7.35366	-1.84259	0.0779326	0.67746	-5.65788
chr4	83034447	83075818	+	ENSG00000138663.9	protein_coding	COPS4	51138	COP9 signalosome subunit 4	CSN4|SGN4	3566	0.30282	4.51656	1.84253	0.077941	0.67746	-5.22916
chr11	70398404	70436584	+	ENSG00000085733.16	protein_coding	CTTN	2017	cortactin	EMS1	6949	-0.924122	0.604865	-1.8421	0.0780069	0.677534	-4.27762
chr11	47589667	47594411	-	ENSG00000172247.4	protein_coding	C1QTNF4	114900	C1q and TNF related 4	CTRP4|ZACRP4	1413	-1.73465	-1.28874	-1.83973	0.0783652	0.677759	-4.07509
chr14	61277370	61281761	-	ENSG00000182107.7	protein_coding	TMEM30B	161291	transmembrane protein 30B	CDC50B	4392	-0.541157	3.38362	-1.8434	0.078371	0.677759	-4.93457
chr1	52895910	52927212	-	ENSG00000121310.17	protein_coding	ECHDC2	55268	enoyl-CoA hydratase domain containing 2	-	11572	-0.1763	7.61065	-1.83949	0.0784022	0.677759	-5.68329
chr22	39399778	39437060	+	ENSG00000100324.14	protein_coding	TAB1	10454	TGF-beta activated kinase 1 (MAP3K7) binding protein 1	3'-Tab1|MAP3K7IP1	4419	0.179667	6.02329	1.83945	0.0784082	0.677759	-5.55562
chrX	119468422	119471396	+	ENSG00000005022.6	protein_coding	SLC25A5	292	solute carrier family 25 member 5	2F1|AAC2|ANT2|T2|T3	1555	0.184309	6.84634	1.83924	0.0784408	0.677759	-5.6423
chr17	50055968	50090481	+	ENSG00000005884.18	protein_coding	ITGA3	3675	integrin subunit alpha 3	CD49C|FRP-2|GAP-B3|GAPB3|ILNEB|MSK18|VCA-2|VL3A|VLA3a	9802	-0.393171	3.57805	-1.8392	0.0784469	0.677759	-5.03541
chr1	108648290	108661526	-	ENSG00000162639.16	protein_coding	HENMT1	113802	HEN methyltransferase 1	C1orf59|HEN1	2426	0.321343	4.36348	1.83919	0.0784477	0.677759	-5.22799
chr22	45190338	45240769	-	ENSG00000100364.18	protein_coding	KIAA0930	23313	KIAA0930	C22orf9|LSC3	10019	0.296206	4.77853	1.83843	0.078564	0.677759	-5.3387
chr19	37312837	37369365	+	ENSG00000181666.18	protein_coding	ZNF875	284459	zinc finger protein 875	HKR1	7337	-0.199301	6.23944	-1.83785	0.0786524	0.677759	-5.57763
chr16	30443631	30445874	-	ENSG00000179918.19	protein_coding	SEPHS2	22928	selenophosphate synthetase 2	SPS2	2244	0.256381	5.9093	1.83761	0.0786876	0.677759	-5.5287
chr18	49477243	49487252	-	ENSG00000177576.12	protein_coding	C18orf32	497661	chromosome 18 open reading frame 32	-	5747	-0.267487	4.29475	-1.83728	0.0787383	0.677759	-5.23242
chrX	16786432	16844519	+	ENSG00000086712.13	protein_coding	TXLNG	55787	taxilin gamma	CXorf15|ELRG|FIAT|LSR5|TXLNGX	4455	-0.253885	6.04897	-1.83683	0.0788078	0.677759	-5.56113
chr12	55684568	55716043	-	ENSG00000135424.18	protein_coding	ITGA7	3679	integrin subunit alpha 7	-	6379	0.644529	1.57229	1.83672	0.0788235	0.677759	-4.39591
chr1	44739818	44767767	+	ENSG00000142945.13	protein_coding	KIF2C	11004	kinesin family member 2C	CT139|KNSL6|MCAK	3646	-0.79691	0.485843	-1.83663	0.0788372	0.677759	-4.28041
chr9	135499984	135504673	+	ENSG00000122140.11	protein_coding	MRPS2	51116	mitochondrial ribosomal protein S2	CGI-91|COXPD36|MRP-S2|S2mt	2464	-0.218947	4.90899	-1.8353	0.0790402	0.678817	-5.35457
chr10	70147289	70170523	-	ENSG00000079332.15	protein_coding	SAR1A	56681	secretion associated Ras related GTPase 1A	SAR1|SARA1|Sara|masra2	6914	-0.22555	6.80844	-1.83507	0.0790754	0.678817	-5.63807
chr12	53180704	53195142	+	ENSG00000139651.11	protein_coding	ZNF740	283337	zinc finger protein 740	Zfp740	9060	0.163056	7.03865	1.83461	0.0791464	0.678932	-5.6605
chr18	63970029	64019779	+	ENSG00000166401.15	protein_coding	SERPINB8	5271	serpin family B member 8	C18orf53|CAP2|PI-8|PI8|PSS5	5764	-0.51109	3.39183	-1.83621	0.0792194	0.679064	-4.96166
chr17	6643311	6651634	-	ENSG00000108590.11	protein_coding	MED31	51003	mediator complex subunit 31	3110004H13Rik|CGI-125|Soh1	2107	-0.446181	2.74946	-1.83365	0.0792934	0.679205	-4.84073
chr6	116267760	116279930	-	ENSG00000189241.8	protein_coding	TSPYL1	7259	TSPY like 1	TSPYL	9089	-0.402204	6.24763	-1.85977	0.0794527	0.679699	-5.52844
chr10	274190	689668	-	ENSG00000151240.17	protein_coding	DIP2C	22982	disco interacting protein 2 homolog C	KIAA0934	8563	-0.434691	4.53014	-1.84517	0.0794663	0.679699	-5.26461
chr11	5754243	5755905	+	ENSG00000181074.4	protein_coding	OR52N4	390072	olfactory receptor family 52 subfamily N member 4	OR11-64	1276	-0.853584	1.22045	-1.83173	0.0795884	0.680193	-4.42673
chr4	77862830	77952785	+	ENSG00000169288.18	protein_coding	MRPL1	65008	mitochondrial ribosomal protein L1	BM022|L1MT|MRP-L1	1628	-0.255211	4.34918	-1.83114	0.0796792	0.680193	-5.21041
chr7	2403588	2448484	+	ENSG00000136213.10	protein_coding	CHST12	55501	carbohydrate sulfotransferase 12	C4S-2|C4ST-2|C4ST2	16116	0.309439	4.42781	1.83103	0.079697	0.680193	-5.25106
chr3	52794768	52809009	+	ENSG00000162267.12	protein_coding	ITIH3	3699	inter-alpha-trypsin inhibitor heavy chain 3	H3P|ITI-HC3|SHAP	5921	-0.590666	1.82744	-1.83032	0.0798062	0.680353	-4.55289
chr8	38163335	38176730	-	ENSG00000175324.10	protein_coding	LSM1	27257	LSM1 homolog, mRNA degradation associated	CASM|YJL124C	1676	-0.327514	4.06002	-1.83016	0.0798312	0.680353	-5.17132
chr17	81509971	81523847	-	ENSG00000184009.12	protein_coding	ACTG1	71	actin gamma 1	ACT|ACTG|DFNA20|DFNA26|HEL-176	2920	0.232872	9.8433	1.83198	0.0800117	0.681299	-5.73766
chr1	62436297	62451804	+	ENSG00000162607.13	protein_coding	USP1	7398	ubiquitin specific peptidase 1	UBP	3869	0.228285	6.0183	1.82869	0.0800577	0.681299	-5.55716
chr5	34019448	34043832	-	ENSG00000082196.20	protein_coding	C1QTNF3	114899	C1q and TNF related 3	C1ATNF3|CORCS|CORS|CORS-26|CORS26|CTRP3	3576	-0.375893	2.85592	-1.82729	0.0802749	0.682655	-4.85319
chr4	109848107	109872315	+	ENSG00000183423.12	protein_coding	LRIT3	345193	leucine rich repeat, Ig-like and transmembrane domains 3	CSNB1F|FIGLER4	3992	0.819158	0.780488	1.8262	0.080443	0.682861	-4.32413
chr11	62123998	62153169	+	ENSG00000149503.13	protein_coding	INCENP	3619	inner centromere protein	-	4454	0.277939	4.29556	1.826	0.0804742	0.682861	-5.24209
chr14	77024543	77028708	-	ENSG00000119669.5	protein_coding	IRF2BPL	64207	interferon regulatory factor 2 binding protein like	C14orf4|EAP1|NEDAMSS	4166	0.283247	5.51666	1.82551	0.0805508	0.682861	-5.47725
chr15	40735884	40755851	-	ENSG00000137824.16	protein_coding	RMDN3	55177	regulator of microtubule dynamics 3	FAM82A2|FAM82C|RMD-3|RMD3|ptpip51	5114	-0.194777	4.90151	-1.82455	0.0807006	0.682861	-5.37503
chr16	720581	722590	+	ENSG00000103254.10	protein_coding	ANTKMT	65990	adenine nucleotide translocase lysine methyltransferase	ANT-KMT|C16orf24|FAM173A	1912	0.414871	2.66091	1.82439	0.0807251	0.682861	-4.78425
chr2	169694454	169701708	+	ENSG00000144362.12	protein_coding	PHOSPHO2	493911	phosphatase, orphan 2	-	1488	0.819717	2.04955	1.82623	0.0808127	0.682861	-4.57282
chr7	75493625	75504304	+	ENSG00000170092.14	protein_coding	SPDYE5	442590	speedy/RINGO cell cycle regulator family member E5	-	3325	0.566162	1.71574	1.82361	0.0808465	0.682861	-4.59441
chr2	27212027	27217178	+	ENSG00000138085.17	protein_coding	ATRAID	51374	all-trans retinoic acid induced differentiation factor	APR--3|APR-3|APR3|C2orf28|HSPC013|PRO240|p18	2019	0.200984	6.27927	1.82343	0.0808752	0.682861	-5.60851
chr2	31867809	32039805	-	ENSG00000162961.14	protein_coding	DPY30	84661	dpy-30 histone methyltransferase complex regulatory subunit	Cps25|HDPY-30|Saf19	2725	-0.288189	3.6923	-1.82266	0.0809952	0.682861	-5.09413
chr1	52408282	52553487	-	ENSG00000134744.14	protein_coding	TUT4	23318	terminal uridylyl transferase 4	PAPD3|TENT3A|ZCCHC11	16199	-0.146081	7.73823	-1.8222	0.0810662	0.682861	-5.7144
chr3	39141855	39154562	-	ENSG00000144655.15	protein_coding	CSRNP1	64651	cysteine and serine rich nuclear protein 1	AXUD1|CSRNP-1|FAM130B|TAIP-3|URAX1	3230	-1.04855	5.29617	-1.87612	0.0810987	0.682861	-5.29697
chr5	96875986	96919703	+	ENSG00000164308.17	protein_coding	ERAP2	64167	endoplasmic reticulum aminopeptidase 2	L-RAP|LRAP	6953	-0.523575	8.14912	-1.87024	0.0811892	0.682861	-5.67458
chr4	186191567	186213463	+	ENSG00000145476.16	protein_coding	CYP4V2	285440	cytochrome P450 family 4 subfamily V member 2	BCD|CYP4AH1	9767	0.286933	6.62588	1.8305	0.0811933	0.682861	-5.64147
chr1	40691648	40771603	+	ENSG00000066136.20	protein_coding	NFYC	4802	nuclear transcription factor Y subunit gamma	CBF-C|CBFC|H1TF2A|HAP5|HSM|NF-YC	5990	-0.168855	6.19825	-1.8209	0.081271	0.682861	-5.61347
chrX	110194186	110440233	-	ENSG00000101935.10	protein_coding	AMMECR1	9949	AMMECR nuclear protein 1	AMMERC1|MFHIEN	6362	-0.386882	5.21491	-1.8327	0.0813161	0.682861	-5.38672
chr13	27424619	27435823	+	ENSG00000122034.16	protein_coding	GTF3A	2971	general transcription factor IIIA	AP2|TFIIIA	2926	-0.144751	8.01868	-1.82029	0.0813652	0.682861	-5.72881
chr8	143833583	143840973	-	ENSG00000185189.18	protein_coding	NRBP2	340371	nuclear receptor binding protein 2	TRG16|pp9320	4934	-0.30423	6.08558	-1.82952	0.0814314	0.682861	-5.59168
chr5	139387467	139390081	-	ENSG00000170476.16	protein_coding	MZB1	51237	marginal zone B and B1 cell specific protein	MEDA-7|PACAP|pERp1	2286	-0.936926	0.837825	-1.81985	0.0814344	0.682861	-4.38655
chr19	7629793	7631956	+	ENSG00000229833.10	protein_coding	PET100	100131801	PET100 cytochrome c oxidase chaperone	C19orf79	2164	-0.499863	3.82421	-1.8246	0.0814564	0.682861	-5.05311
chr4	70655541	70681817	-	ENSG00000132465.12	protein_coding	JCHAIN	3512	joining chain of multimeric IgA and IgM	IGCJ|IGJ|JCH	1546	-1.3211	2.00272	-1.86095	0.0814922	0.682861	-4.65256
chr5	126531200	126595362	-	ENSG00000164904.18	protein_coding	ALDH7A1	501	aldehyde dehydrogenase 7 family member A1	ATQ1|EPD|PDE	17914	-0.863293	1.01444	-1.81815	0.0817026	0.682861	-4.35622
chr2	61017225	61051990	+	ENSG00000162928.9	protein_coding	PEX13	5194	peroxisomal biogenesis factor 13	NALD|PBD11A|PBD11B|ZWS	5910	0.27817	4.52358	1.81775	0.0817656	0.682861	-5.29657
chr22	38084900	38110684	-	ENSG00000128298.17	protein_coding	BAIAP2L2	80115	BAR/IMD domain containing adaptor protein 2 like 2	-	2149	-0.508782	2.27617	-1.81716	0.081858	0.682861	-4.70109
chrX	48922028	48958386	-	ENSG00000068308.13	protein_coding	OTUD5	55593	OTU deubiquitinase 5	DUBA	3592	0.160372	7.31274	1.81641	0.0819763	0.682861	-5.70888
chr20	5114953	5126626	-	ENSG00000132646.11	protein_coding	PCNA	5111	proliferating cell nuclear antigen	ATLD2	1403	0.488545	4.95299	1.84317	0.0820579	0.682861	-5.37115
chr3	196946356	196969060	-	ENSG00000119227.8	protein_coding	PIGZ	80235	phosphatidylinositol glycan anchor biosynthesis class Z	GPI-MT-IV|PIG-Z|SMP3	3198	-0.999453	0.237281	-1.81583	0.0820682	0.682861	-4.25542
chr12	109900264	109983841	+	ENSG00000139437.18	protein_coding	TCHP	84260	trichoplein keratin filament binding	TpMs	9054	0.161184	6.05194	1.81574	0.082082	0.682861	-5.59872
chr1	99970011	100083321	+	ENSG00000283761.1	protein_coding	AC118553.2	NA	NA	NA	5765	0.972274	0.673747	1.81534	0.0821463	0.682861	-4.25033
chr6	2987987	3021850	+	ENSG00000124588.21	protein_coding	NQO2	4835	N-ribosyldihydronicotinamide:quinone reductase 2	DHQV|DIA6|NMOR2|QR2	4539	0.330511	3.80415	1.81496	0.0822057	0.682861	-5.13702
chr21	44849585	44873903	-	ENSG00000183255.12	protein_coding	PTTG1IP	754	PTTG1 interacting protein	C21orf1|C21orf3|PBF	3537	-0.24272	6.61318	-1.81536	0.0822867	0.682861	-5.66534
chr1	37996770	38005606	-	ENSG00000183386.10	protein_coding	FHL3	2275	four and a half LIM domains 3	SLIM2	2004	0.487525	2.0362	1.81381	0.0823886	0.682861	-4.69179
chr15	74954418	74956772	-	ENSG00000178718.7	protein_coding	RPP25	54913	ribonuclease P and MRP subunit p25	-	2355	0.956437	1.09809	1.81373	0.0824002	0.682861	-4.40014
chr6	36442767	36491143	+	ENSG00000112078.14	protein_coding	KCTD20	222658	potassium channel tetramerization domain containing 20	C6orf69|dJ108K11.3	6239	-0.167466	6.9481	-1.81354	0.0824301	0.682861	-5.68497
chr1	101236865	101243713	+	ENSG00000170989.10	protein_coding	S1PR1	1901	sphingosine-1-phosphate receptor 1	CD363|CHEDG1|D1S3362|ECGF1|EDG-1|EDG1|S1P1	5223	-0.445386	8.30531	-1.85522	0.082519	0.682861	-5.69638
chr14	102362941	102502477	+	ENSG00000196663.16	protein_coding	TECPR2	9895	tectonin beta-propeller repeat containing 2	KIAA0329|SPG49	9402	0.26438	4.72146	1.81293	0.0825278	0.682861	-5.35029
chr1	8945867	8975092	+	ENSG00000131686.15	protein_coding	CA6	765	carbonic anhydrase 6	CA-VI|GUSTIN	2662	-0.352328	5.05531	-1.81821	0.0825683	0.682861	-5.40125
chrX	101393273	101408012	-	ENSG00000102393.13	protein_coding	GLA	2717	galactosidase alpha	GALA	6195	-0.357421	2.97365	-1.81242	0.0826082	0.682861	-4.93983
chrX	106813871	107000212	-	ENSG00000133131.15	protein_coding	MORC4	79710	MORC family CW-type zinc finger 4	ZCW4|ZCWCC2|dJ75H8.2	6019	-0.222693	4.47315	-1.81221	0.0826419	0.682861	-5.29362
chr19	39530987	39532852	-	ENSG00000176401.6	protein_coding	EID2B	126272	EP300 interacting inhibitor of differentiation 2B	EID-2B|EID-3	1866	0.483923	2.0834	1.81211	0.0826576	0.682861	-4.66413
chr13	99606669	99897134	+	ENSG00000125246.15	protein_coding	CLYBL	171425	citramalyl-CoA lyase	CLB	7227	0.242658	3.98575	1.81205	0.0826676	0.682861	-5.17747
chr2	61145068	61164829	+	ENSG00000237651.6	protein_coding	C2orf74	339804	chromosome 2 open reading frame 74	-	1515	0.789869	1.70671	1.81202	0.0826727	0.682861	-4.54103
chr9	36190856	36304781	+	ENSG00000122705.17	protein_coding	CLTA	1211	clathrin light chain A	LCA	2515	0.249638	5.11468	1.81139	0.082772	0.683202	-5.45096
chr5	44808947	44820428	+	ENSG00000112996.11	protein_coding	MRPS30	10884	mitochondrial ribosomal protein S30	MRP-S30|PAP|PDCD9|S30mt	6180	-0.238686	5.68123	-1.81052	0.0829107	0.683868	-5.53753
chr6	43671303	43687791	-	ENSG00000096080.11	protein_coding	MRPS18A	55168	mitochondrial ribosomal protein S18A	HumanS18b|MRP-S18-3|MRP-S18-a|MRPS18-3|S18bmt|S18mt-a	1284	-0.34547	2.90819	-1.80986	0.0830156	0.684234	-4.88491
chr17	81683326	81703138	+	ENSG00000185359.13	protein_coding	HGS	9146	hepatocyte growth factor-regulated tyrosine kinase substrate	HRS	8205	0.177096	7.03403	1.80934	0.0830991	0.684234	-5.7023
chr11	72080337	72096895	+	ENSG00000184154.15	protein_coding	LRTOMT	220074	leucine rich transmembrane and O-methyltransferase domain containing	CFAP111|DFNB63|LRRC51	3541	0.355017	3.21239	1.80902	0.0831509	0.684234	-4.94985
chr19	10553085	10566031	-	ENSG00000129347.21	protein_coding	KRI1	65095	KRI1 homolog	-	4254	-0.161699	7.32218	-1.80869	0.0832032	0.684234	-5.72155
chr3	196027183	196082096	-	ENSG00000072274.13	protein_coding	TFRC	7037	transferrin receptor	CD71|IMD46|T9|TFR|TFR1|TR|TRFR|p90	7794	-0.192358	6.31691	-1.80836	0.0832561	0.684234	-5.62755
chr1	20806292	21176888	-	ENSG00000075151.20	protein_coding	EIF4G3	8672	eukaryotic translation initiation factor 4 gamma 3	eIF-4G 3|eIF4G 3|eIF4GII	9596	0.219583	5.63377	1.80799	0.083315	0.684234	-5.56208
chr17	60443158	60526242	-	ENSG00000062725.10	protein_coding	APPBP2	10513	amyloid beta precursor protein binding protein 2	APP-BP2|HS.84084|PAT1	9890	-0.205183	6.40267	-1.8077	0.0833611	0.684234	-5.63934
chr11	128836315	128867373	-	ENSG00000151704.15	protein_coding	KCNJ1	3758	potassium inwardly rectifying channel subfamily J member 1	KIR1.1|ROMK|ROMK1	4637	-1.15645	0.336447	-1.80666	0.083529	0.684643	-4.31035
chrX	47145221	47186813	+	ENSG00000182872.16	protein_coding	RBM10	8241	RNA binding motif protein 10	DXS8237E|GPATC9|GPATCH9|S1-1|TARPS|ZRANB5	3537	0.168954	6.70919	1.80651	0.0835518	0.684643	-5.68452
chr9	114334156	114394405	-	ENSG00000106948.17	protein_coding	AKNA	80709	AT-hook transcription factor	-	10601	0.128337	9.71792	1.80623	0.0835966	0.684643	-5.77772
chr19	11574660	11579008	-	ENSG00000102575.13	protein_coding	ACP5	54	acid phosphatase 5, tartrate resistant	HPAP|TRACP5a|TRACP5b|TRAP|TrATPase	2919	0.298943	5.12317	1.8066	0.0836498	0.684643	-5.46782
chr1	51577179	51798427	+	ENSG00000117859.19	protein_coding	OSBPL9	114883	oxysterol binding protein like 9	ORP-9|ORP9	10273	-0.163321	6.27343	-1.80558	0.0837012	0.684643	-5.64118
chr17	43014607	43025123	-	ENSG00000108828.16	protein_coding	VAT1	10493	vesicle amine transport 1	VATI	3466	0.197874	5.06597	1.80513	0.0837738	0.684762	-5.46992
chr11	3339261	3379222	-	ENSG00000005801.18	protein_coding	ZNF195	7748	zinc finger protein 195	HRF1|ZNFP104	11711	-0.198924	6.2493	-1.80421	0.0839226	0.685191	-5.63568
chr4	103105349	103198445	-	ENSG00000138778.13	protein_coding	CENPE	1062	centromere protein E	CENP-E|KIF10|MCPH13|PPP1R61	9928	-0.818296	0.856763	-1.80408	0.0839424	0.685191	-4.38216
chr14	20457681	20461465	-	ENSG00000165782.11	protein_coding	PIP4P1	90809	phosphatidylinositol-4,5-bisphosphate 4-phosphatase 1	C14orf9|TMEM55B	3694	-0.17518	6.18969	-1.80367	0.0840095	0.685265	-5.63884
chr17	82519713	82644662	+	ENSG00000141568.21	protein_coding	FOXK2	3607	forkhead box K2	ILF|ILF-1|ILF1|nGTBP	9986	0.172545	6.11472	1.80218	0.0842501	0.685836	-5.62845
chr17	76470891	76501790	-	ENSG00000129667.13	protein_coding	RHBDF2	79651	rhomboid 5 homolog 2	RHBDL5|RHBDL6|TEC|TOC|TOCG|iRhom2	7055	-0.266479	4.33749	-1.80212	0.0842593	0.685836	-5.28961
chr17	17246616	17281273	-	ENSG00000141030.13	protein_coding	COPS3	8533	COP9 signalosome subunit 3	CSN3|SGN3	2972	-0.204803	5.4997	-1.80205	0.0842704	0.685836	-5.52982
chr7	148807383	148884321	-	ENSG00000106462.11	protein_coding	EZH2	2146	enhancer of zeste 2 polycomb repressive complex 2 subunit	ENX-1|ENX1|EZH2b|KMT6|KMT6A|WVS|WVS2	4522	-0.236976	4.60733	-1.80179	0.0843121	0.685836	-5.36945
chr17	39404285	39451272	-	ENSG00000125686.12	protein_coding	MED1	5469	mediator complex subunit 1	CRSP1|CRSP200|DRIP205|DRIP230|PBP|PPARBP|PPARGBP|RB18A|TRAP220|TRIP2	8608	0.195443	7.14383	1.7999	0.0846188	0.687452	-5.72715
chr10	97332497	97334729	-	ENSG00000181274.7	protein_coding	FRAT2	23401	FRAT regulator of WNT signaling pathway 2	FRAT-2	2233	-0.502859	4.42474	-1.81676	0.0846275	0.687452	-5.23182
chr14	104769349	104795751	-	ENSG00000142208.16	protein_coding	AKT1	207	AKT serine/threonine kinase 1	AKT|PKB|PKB-ALPHA|PRKBA|RAC|RAC-ALPHA	11162	0.149235	6.95641	1.79774	0.0849699	0.688646	-5.7169
chr20	62642503	62685785	+	ENSG00000101187.16	protein_coding	SLCO4A1	28231	solute carrier organic anion transporter family member 4A1	OATP-E|OATP1|OATP4A1|OATPE|OATPRP1|POAT|SLC21A12	3991	1.16305	-0.189806	1.79753	0.0850042	0.688646	-4.17726
chr19	39406847	39409412	+	ENSG00000128016.7	protein_coding	ZFP36	7538	ZFP36 ring finger protein	G0S24|GOS24|NUP475|RNF162A|TIS11|TTP|zfp-36	1976	-0.295811	7.5585	-1.81216	0.0851464	0.688646	-5.73229
chr10	132808392	132942823	-	ENSG00000171811.14	protein_coding	CFAP46	54777	cilia and flagella associated protein 46	C10orf123|C10orf124|C10orf92|C10orf93|TTC40|bA288G11.4|bA288G11.5|bB137A17.2|bB137A17.3	10698	0.597691	1.51285	1.79646	0.0851784	0.688646	-4.52136
chr7	99374249	99394816	+	ENSG00000130429.15	protein_coding	ARPC1B	10095	actin related protein 2/3 complex subunit 1B	ARC41|IMD71|PLTEID|p40-ARC|p41-ARC	3988	0.263216	4.38417	1.79571	0.0853006	0.688646	-5.30879
chr11	118003634	118088299	-	ENSG00000255274.9	protein_coding	SMIM35	100526771	small integral membrane protein 35	TMPRSS4-AS1	3769	0.748047	1.37181	1.79571	0.085301	0.688646	-4.48469
chr3	119821321	120094447	-	ENSG00000082701.16	protein_coding	GSK3B	2932	glycogen synthase kinase 3 beta	-	8188	0.153331	6.7238	1.79566	0.0853091	0.688646	-5.70031
chr8	11769639	11787345	+	ENSG00000154328.16	protein_coding	NEIL2	252969	nei like DNA glycosylase 2	NEH2|NEI2	3366	0.238835	4.49344	1.79558	0.0853219	0.688646	-5.2795
chr10	103967140	104029233	+	ENSG00000065613.15	protein_coding	SLK	9748	STE20 like kinase	LOSK|STK2|bA16H23.1|se20-9	8107	0.208525	6.76464	1.79439	0.085517	0.688646	-5.70191
chr17	8140472	8156506	-	ENSG00000179094.16	protein_coding	PER1	5187	period circadian regulator 1	PER|RIGUI|hPER	7002	-0.713223	6.68268	-1.84456	0.0856431	0.688646	-5.61703
chr2	74361154	74392087	-	ENSG00000204843.12	protein_coding	DCTN1	1639	dynactin subunit 1	DAP-150|DP-150|P135	10439	0.165359	7.09322	1.79311	0.0857274	0.688646	-5.73578
chr14	20446401	20455089	-	ENSG00000092094.11	protein_coding	OSGEP	55644	O-sialoglycoprotein endopeptidase	GAMOS3|GCPL1|KAE1|OSGEP1|PRSMG1|TCS3	5031	0.166014	6.52623	1.79303	0.0857391	0.688646	-5.68872
chr5	111662621	111997464	-	ENSG00000134986.14	protein_coding	NREP	9315	neuronal regeneration related protein	C5orf13|D4S114|P311|PRO1873|PTZ17|SEZ17	9308	0.525825	2.37655	1.79295	0.0857527	0.688646	-4.77039
chr13	108251240	108308484	+	ENSG00000102524.11	protein_coding	TNFSF13B	10673	TNF superfamily member 13b	BAFF|BLYS|CD257|DTL|TALL-1|TALL1|THANK|TNFSF20|TNLG7A|ZTNF4	3059	-0.704186	2.44931	-1.79402	0.0857546	0.688646	-4.70558
chr3	167683298	167734939	-	ENSG00000114209.15	protein_coding	PDCD10	11235	programmed cell death 10	CCM3|TFAR15	3275	-0.207044	5.27305	-1.79261	0.0858088	0.688646	-5.49925
chr6	43021623	43034156	+	ENSG00000124541.7	protein_coding	RRP36	88745	ribosomal RNA processing 36	C6orf153|dJ20C7.4	2236	0.214931	5.25847	1.79259	0.0858121	0.688646	-5.50116
chr16	20702816	20742084	-	ENSG00000066654.14	protein_coding	THUMPD1	55623	THUMP domain containing 1	Tan1	6501	-0.247845	7.17753	-1.7956	0.08585	0.688646	-5.72425
chr9	92947523	93036236	+	ENSG00000127084.19	protein_coding	FGD3	89846	FYVE, RhoGEF and PH domain containing 3	ZFYVE5	5818	0.173885	9.0535	1.7923	0.0858593	0.688646	-5.79461
chr11	65084210	65088398	+	ENSG00000162300.13	protein_coding	ZFPL1	7542	zinc finger protein like 1	D11S750|MCG4	3120	0.383181	2.41804	1.79215	0.0858837	0.688646	-4.78482
chr9	136006537	136095289	-	ENSG00000148411.8	protein_coding	NACC2	138151	NACC family member 2	BEND9|BTBD14|BTBD14A|BTBD31|NAC-2|RBB	7216	-0.441805	3.46773	-1.79261	0.0860079	0.688845	-5.12544
chr10	119499817	119542719	-	ENSG00000148908.15	protein_coding	RGS10	6001	regulator of G protein signaling 10	-	1274	-0.170541	7.19353	-1.79129	0.0860254	0.688845	-5.73589
chr12	123918660	123972831	-	ENSG00000119242.8	protein_coding	CCDC92	80212	coiled-coil domain containing 92	-	8223	0.491557	2.75873	1.78955	0.0863121	0.69051	-4.90093
chr10	38094334	38150293	+	ENSG00000075407.18	protein_coding	ZNF37A	7587	zinc finger protein 37A	KOX21|ZNF37	13190	-0.254238	6.47033	-1.79116	0.0863504	0.69051	-5.67499
chr10	70137981	70146700	-	ENSG00000156521.14	protein_coding	TYSND1	219743	trypsin like peroxisomal matrix peptidase 1	NET41	4621	0.167679	6.19492	1.78678	0.08677	0.692993	-5.66904
chr12	53251251	53254406	+	ENSG00000182544.9	protein_coding	MFSD5	84975	major facilitator superfamily domain containing 5	hsMOT2	2583	0.339617	3.73852	1.78673	0.0867783	0.692993	-5.13347
chr20	59936663	59940305	-	ENSG00000132825.7	protein_coding	PPP1R3D	5509	protein phosphatase 1 regulatory subunit 3D	PPP1R6	3643	-0.435413	2.87395	-1.78618	0.0868702	0.69307	-4.90033
chr7	69598296	70793506	+	ENSG00000158321.18	protein_coding	AUTS2	26053	activator of transcription and developmental regulator AUTS2	FBRSL2|MRD26	24887	-0.505396	3.30783	-1.79213	0.0869221	0.69307	-5.10414
chr6	99432325	99521728	-	ENSG00000123552.18	protein_coding	USP45	85015	ubiquitin specific peptidase 45	LCA19	8105	-0.505737	4.6669	-1.80797	0.0869979	0.69307	-5.31978
chrX	119758588	119760202	+	ENSG00000187808.5	protein_coding	SOWAHD	347454	sosondowah ankyrin repeat domain family member D	ANKRD58	1615	1.07671	-0.0822919	1.78474	0.0871098	0.69307	-4.24012
chr6	42050513	42087461	+	ENSG00000137413.16	protein_coding	TAF8	129685	TATA-box binding protein associated factor 8	II|TAF|TAF(II)43|TAFII-43|TAFII43|TBN	9284	0.222182	5.989	1.78393	0.0872449	0.69307	-5.63781
chr18	44680173	45068510	+	ENSG00000152217.19	protein_coding	SETBP1	26040	SET binding protein 1	MRD29|SEB	14024	1.18079	-0.604142	1.78391	0.0872478	0.69307	-4.26836
chr2	73233420	73253021	+	ENSG00000135624.16	protein_coding	CCT7	10574	chaperonin containing TCP1 subunit 7	CCTETA|CCTH|NIP7-1|TCP1ETA	3591	0.188604	7.12997	1.78291	0.0874142	0.69307	-5.75421
chr3	40477113	40491053	+	ENSG00000177873.14	protein_coding	ZNF619	285267	zinc finger protein 619	-	5331	0.398811	3.57452	1.78289	0.0874173	0.69307	-5.10935
chr3	194640791	194672463	-	ENSG00000041802.11	protein_coding	LSG1	55341	large 60S subunit nuclear export GTPase 1	-	4801	0.246579	6.90988	1.78503	0.0874388	0.69307	-5.72247
chr19	4183354	4224814	+	ENSG00000089847.12	protein_coding	ANKRD24	170961	ankyrin repeat domain 24	-	4474	-0.543269	2.87266	-1.78245	0.0874907	0.69307	-4.88486
chr4	140620782	140756385	-	ENSG00000109436.8	protein_coding	TBC1D9	23158	TBC1 domain family member 9	GRAMD9|MDR1	5851	-1.53091	-0.733755	-1.78381	0.0875132	0.69307	-4.21778
chr14	77708071	77761104	+	ENSG00000119705.10	protein_coding	SLIRP	81892	SRA stem-loop interacting RNA binding protein	C14orf156|DC50|PD04872	2631	-0.369104	3.86974	-1.78194	0.0875757	0.69307	-5.16967
chr8	143289676	143299952	+	ENSG00000185730.8	protein_coding	ZNF696	79943	zinc finger protein 696	-	5903	0.383529	4.14038	1.78287	0.0877635	0.69307	-5.29162
chrX	18892298	18984114	-	ENSG00000044446.12	protein_coding	PHKA2	5256	phosphorylase kinase regulatory subunit alpha 2	GSD9A|PHK|PYK|PYKL|XLG|XLG2	8547	0.16695	6.50771	1.78045	0.0878248	0.69307	-5.70996
chr7	16599779	16645817	-	ENSG00000106524.9	protein_coding	ANKMY2	57037	ankyrin repeat and MYND domain containing 2	ZMYND20	2851	-0.277286	4.07034	-1.78033	0.0878462	0.69307	-5.24538
chr6	20099684	20212469	-	ENSG00000172197.11	protein_coding	MBOAT1	154141	membrane bound O-acyltransferase domain containing 1	LPEAT1|LPLAT|LPLAT 1|LPSAT|OACT1|dJ434O11.1	4325	-0.318584	4.03466	-1.7802	0.0878668	0.69307	-5.22052
chr1	153357854	153361023	+	ENSG00000163220.11	protein_coding	S100A9	6280	S100 calcium binding protein A9	60B8AG|CAGB|CFAG|CGLB|L1AG|LIAG|MAC387|MIF|MRP14|NIF|P14	573	1.58035	1.82757	1.81559	0.0878738	0.69307	-4.50174
chr19	3094362	3123999	+	ENSG00000088256.9	protein_coding	GNA11	2767	G protein subunit alpha 11	FBH|FBH2|FHH2|GNA-11|HHC2|HYPOC2	6285	0.308416	4.02445	1.77978	0.0879378	0.69307	-5.24136
chr1	150282543	150287093	+	ENSG00000159208.16	protein_coding	CIART	148523	circadian associated repressor of transcription	C1orf51|CHRONO|GM129	2849	-1.25664	-0.199636	-1.77961	0.0879664	0.69307	-4.20116
chr19	12875209	12881466	-	ENSG00000105612.9	protein_coding	DNASE2	1777	deoxyribonuclease 2, lysosomal	DNASE2A|DNL|DNL2	2389	0.282614	4.33968	1.77878	0.088106	0.69307	-5.33863
chr22	17787649	18024561	-	ENSG00000243156.9	protein_coding	MICAL3	57553	microtubule associated monooxygenase, calponin and LIM domain containing 3	MICAL-3	22444	-0.650423	3.0715	-1.78934	0.0881714	0.69307	-4.94235
chr1	84643707	84690803	-	ENSG00000117155.16	protein_coding	SSX2IP	117178	SSX family member 2 interacting protein	ADIP|hMsd1	8639	0.317829	4.44187	1.77796	0.0882429	0.69307	-5.30336
chr19	34956354	34964229	-	ENSG00000180884.10	protein_coding	ZNF792	126375	zinc finger protein 792	-	4414	0.243186	5.4122	1.77788	0.0882563	0.69307	-5.5475
chr14	102922663	102933596	+	ENSG00000166126.11	protein_coding	AMN	81693	amnion associated transmembrane protein	IGS2|PRO1028|amnionless	4289	0.364372	3.46865	1.77722	0.0883684	0.69307	-5.02925
chr9	36833269	37034268	-	ENSG00000196092.14	protein_coding	PAX5	5079	paired box 5	ALL3|BSAP	9570	-1.03774	0.791917	-1.77692	0.0884194	0.69307	-4.37106
chr1	45620044	45624057	-	ENSG00000159588.15	protein_coding	CCDC17	149483	coiled-coil domain containing 17	-	3323	-0.476859	2.03166	-1.77677	0.088444	0.69307	-4.69512
chr5	141260225	141320784	-	ENSG00000178913.8	protein_coding	TAF7	6879	TATA-box binding protein associated factor 7	TAF2F|TAFII55	2684	0.204451	7.43936	1.77651	0.0884878	0.69307	-5.77322
chr1	211258377	211316385	+	ENSG00000117625.14	protein_coding	RCOR3	55758	REST corepressor 3	-	9092	-0.205454	6.68364	-1.77641	0.0885051	0.69307	-5.72876
chr12	49127782	49131397	-	ENSG00000123416.15	protein_coding	TUBA1B	10376	tubulin alpha 1b	K-ALPHA-1	3574	0.463217	5.73945	1.81035	0.0885109	0.69307	-5.57817
chr1	37489993	37514766	-	ENSG00000163875.16	protein_coding	MEAF6	64769	MYST/Esa1 associated factor 6	C1orf149|CENP-28|EAF6|NY-SAR-91	6061	0.164778	6.06816	1.77592	0.0885878	0.69307	-5.66232
chr1	93561741	93847150	-	ENSG00000137936.18	protein_coding	BCAR3	8412	BCAR3 adaptor protein, NSP family member	AND-34|NSP2|SH2D3B	6919	-0.755862	0.347823	-1.77509	0.0887267	0.69307	-4.35132
chr3	68004247	68545621	+	ENSG00000183662.11	protein_coding	TAFA1	407738	TAFA chemokine like family member 1	FAM19A1|TAFA-1	2898	-1.10392	0.404876	-1.77503	0.0887369	0.69307	-4.29125
chr17	5032600	5052009	-	ENSG00000132517.15	protein_coding	SLC52A1	55065	solute carrier family 52 member 1	GPCR42|GPR172B|PAR2|RBFVD|RFT1|RFVT1|hRFT1|huPAR-2	3934	-1.23781	-0.182769	-1.77481	0.0887747	0.69307	-4.25319
chr10	68414064	68472121	-	ENSG00000138346.15	protein_coding	DNA2	1763	DNA replication helicase/nuclease 2	DNA2L|hDNA2	4925	-0.415389	2.95642	-1.77428	0.0888641	0.69307	-4.95659
chr11	108665069	108940927	+	ENSG00000178105.11	protein_coding	DDX10	1662	DEAD-box helicase 10	Dbp4|HRH-J8	8606	-0.249415	4.67696	-1.77403	0.0889067	0.69307	-5.41114
chr19	41877279	41881372	+	ENSG00000105369.10	protein_coding	CD79A	973	CD79a molecule	IGA|MB-1	1344	-0.533869	2.74645	-1.77388	0.0889318	0.69307	-4.90636
chrX	101349447	101390796	-	ENSG00000010671.16	protein_coding	BTK	695	Bruton tyrosine kinase	AGMX1|AT|ATK|BPK|IGHD3|IMD1|PSCTK1|XLA	4575	-1.62835	-0.207494	-1.77499	0.0892121	0.69307	-4.21699
chr7	149764182	149773588	-	ENSG00000181444.13	protein_coding	ZNF467	168544	zinc finger protein 467	EZI|Zfp467	2843	-0.314764	3.51122	-1.77199	0.0892525	0.69307	-5.15359
chr17	4948092	4957131	+	ENSG00000108515.18	protein_coding	ENO3	2027	enolase 3	GSD13|MSE	4292	0.180645	5.33331	1.77196	0.0892579	0.69307	-5.54023
chr12	107732871	107761272	-	ENSG00000110851.12	protein_coding	PRDM4	11108	PR/SET domain 4	PFM1	4772	0.170113	6.22518	1.77175	0.0892936	0.69307	-5.68971
chr7	149872968	149891204	+	ENSG00000171130.18	protein_coding	ATP6V0E2	155066	ATPase H+ transporting V0 subunit e2	ATP6V0E2L|C7orf32	6751	-0.230269	6.30582	-1.77125	0.0893777	0.69307	-5.70705
chr22	41244779	41286187	-	ENSG00000100401.20	protein_coding	RANGAP1	5905	Ran GTPase activating protein 1	Fug1|RANGAP|SD	6116	0.163061	6.87712	1.77112	0.0894007	0.69307	-5.75392
chr3	150546678	150586016	+	ENSG00000144895.12	protein_coding	EIF2A	83939	eukaryotic translation initiation factor 2A	CDA02|EIF-2A|MST089|MSTP004|MSTP089	5905	-0.201255	7.39704	-1.7711	0.0894046	0.69307	-5.78065
chr5	126867714	127030558	-	ENSG00000173926.6	protein_coding	MARCHF3	115123	membrane associated ring-CH-type finger 3	MARCH-III|MARCH3|RNF173	4929	0.386798	3.38202	1.77076	0.0894623	0.69307	-5.05448
chr3	57268342	57292685	-	ENSG00000239388.9	protein_coding	ASB14	142686	ankyrin repeat and SOCS box containing 14	-	3240	0.604036	2.28572	1.7707	0.0894723	0.69307	-4.77016
chr18	47152834	47176364	-	ENSG00000134049.6	protein_coding	IER3IP1	51124	immediate early response 3 interacting protein 1	HSPC039|MEDS|PRO2309	4233	-0.283065	3.95192	-1.77059	0.0894909	0.69307	-5.23174
chr19	49635292	49640143	-	ENSG00000126458.4	protein_coding	RRAS	6237	RAS related	R-Ras	1102	-0.402169	3.38534	-1.77001	0.0895899	0.693381	-5.10471
chr3	46515385	46580099	-	ENSG00000163827.13	protein_coding	LRRC2	79442	leucine rich repeat containing 2	-	5634	0.758361	1.01561	1.76764	0.0899943	0.695605	-4.43778
chr21	31118416	31559977	-	ENSG00000156299.13	protein_coding	TIAM1	7074	TIAM Rac1 associated GEF 1	TIAM-1	9216	-0.236994	6.99744	-1.76928	0.0900068	0.695605	-5.76566
chr22	27978014	28679865	-	ENSG00000100154.14	protein_coding	TTC28	23331	tetratricopeptide repeat domain 28	TPRBK	12645	0.350833	3.91714	1.76729	0.0900541	0.695605	-5.22212
chr2	74135400	74147912	-	ENSG00000163170.12	protein_coding	BOLA3	388962	bolA family member 3	MMDS2	3072	-0.458275	2.74685	-1.7665	0.0901885	0.69584	-4.9198
chr5	10441524	10472029	+	ENSG00000145491.12	protein_coding	ROPN1L	83853	rhophilin associated tail protein 1 like	ASP|RSPH11	1815	1.36312	-0.803586	1.76518	0.0904151	0.69584	-4.19965
chr4	89236383	89307800	-	ENSG00000185477.5	protein_coding	GPRIN3	285513	GPRIN family member 3	GRIN3	14998	-0.339269	7.6107	-1.78986	0.0904273	0.69584	-5.76974
chr6	44278734	44297698	-	ENSG00000146221.10	protein_coding	TCTE1	202500	t-complex-associated-testis-expressed 1	D6S46|DRC5|FAP155	3086	1.27395	-0.659511	1.76465	0.0905059	0.69584	-4.19591
chr12	69348381	69354234	+	ENSG00000090382.7	protein_coding	LYZ	4069	lysozyme	LYZF1|LZM	1724	1.47897	1.99872	1.79919	0.0905729	0.69584	-4.57334
chr10	49942056	50011654	+	ENSG00000178440.7	protein_coding	TIMM23B-AGAP6	113218477	TIMM23B-AGAP6 readthrough (NMD candidate)	LINC00843	4297	0.535217	1.84964	1.76382	0.0906486	0.69584	-4.68538
chr14	77320996	77331597	+	ENSG00000100577.19	protein_coding	GSTZ1	2954	glutathione S-transferase zeta 1	GSTZ1-1|MAAI|MAAID|MAI	8365	0.423645	2.52168	1.76377	0.0906581	0.69584	-4.82807
chr7	99473877	99504857	-	ENSG00000160908.15	protein_coding	ZNF394	84124	zinc finger protein 394	ZKSCAN14|ZSCAN46	8611	-0.395542	6.84286	-1.79494	0.0906664	0.69584	-5.71321
chr10	118297925	118342328	-	ENSG00000165669.14	protein_coding	FAM204A	63877	family with sequence similarity 204 member A	C10orf84|bA319I23.1	15023	-0.17086	5.87319	-1.7637	0.0906697	0.69584	-5.64753
chr7	97851677	97872542	-	ENSG00000070669.17	protein_coding	ASNS	440	asparagine synthetase (glutamine-hydrolyzing)	ASNSD|TS11	4896	0.469768	2.36177	1.76367	0.0906758	0.69584	-4.80953
chr11	59208510	59212927	-	ENSG00000197629.6	protein_coding	MPEG1	219972	macrophage expressed 1	MPG1|MPS1|Mpg-1|P-2	4418	-1.09797	1.33975	-1.76566	0.0907335	0.69584	-4.42855
chr1	35713877	35718894	-	ENSG00000142686.8	protein_coding	C1orf216	127703	chromosome 1 open reading frame 216	-	3049	0.454392	2.40997	1.76286	0.0908145	0.696008	-4.86615
chr12	56118260	56127514	+	ENSG00000135482.7	protein_coding	ZC3H10	84872	zinc finger CCCH-type containing 10	ZC3HDC10	8363	0.393923	3.13008	1.76252	0.0908741	0.696013	-5.03853
chr7	23597382	23644708	+	ENSG00000169193.12	protein_coding	CCDC126	90693	coiled-coil domain containing 126	-	3547	0.441753	2.63149	1.76065	0.0911971	0.697453	-4.90463
chr1	9943428	9985501	+	ENSG00000173614.14	protein_coding	NMNAT1	64802	nicotinamide nucleotide adenylyltransferase 1	LCA9|NMNAT|PNAT1	4610	-0.369252	2.89937	-1.76056	0.0912114	0.697453	-4.95341
chr16	89818179	89871319	+	ENSG00000204991.11	protein_coding	SPIRE2	84501	spire type actin nucleation factor 2	Spir-2	7999	0.653847	1.31399	1.7604	0.0912396	0.697453	-4.52431
chr16	31180138	31191605	+	ENSG00000089280.19	protein_coding	FUS	2521	FUS RNA binding protein	ALS6|ETM4|FUS1|HNRNPP2|POMP75|TLS	6989	0.174197	9.55381	1.75889	0.0915022	0.698033	-5.85306
chr16	55509072	55586666	+	ENSG00000087253.13	protein_coding	LPCAT2	54947	lysophosphatidylcholine acyltransferase 2	AGPAT11|AYTL1|LysoPAFAT	7361	-1.45807	-1.49402	-1.75845	0.0915784	0.698033	-4.20284
chr8	54046367	54102017	-	ENSG00000120992.18	protein_coding	LYPLA1	10434	lysophospholipase 1	APT-1|APT1|LPL-I|LPL1|hAPT1	4694	0.24092	5.0694	1.75835	0.0915953	0.698033	-5.48618
chr19	23739195	23758891	-	ENSG00000196172.9	protein_coding	ZNF681	148213	zinc finger protein 681	-	6497	0.382406	3.85934	1.75819	0.0916226	0.698033	-5.17409
chr1	77562416	77683419	-	ENSG00000036549.13	protein_coding	ZZZ3	26009	zinc finger ZZ-type containing 3	ATAC1	9008	-0.232251	6.67756	-1.75793	0.0916677	0.698033	-5.74783
chr14	58633967	58648321	+	ENSG00000165617.15	protein_coding	DACT1	51339	dishevelled binding antagonist of beta catenin 1	DAPPER|DAPPER1|DPR1|FRODO|HDPR1|TBS2|THYEX3	4584	-0.623258	5.83907	-1.8022	0.0916704	0.698033	-5.56262
chr7	100307702	100322196	+	ENSG00000214300.7	protein_coding	SPDYE3	441272	speedy/RINGO cell cycle regulator family member E3	SPDYB2	4131	-1.32685	-0.613535	-1.75729	0.0917798	0.698415	-4.22741
chr17	75909574	75941140	-	ENSG00000188878.19	protein_coding	FBF1	85302	Fas binding factor 1	Alb|FBF-1	6730	0.275793	4.60244	1.75661	0.0918985	0.698867	-5.3921
chr20	35278907	35284985	-	ENSG00000242372.9	protein_coding	EIF6	3692	eukaryotic translation initiation factor 6	CAB|EIF3A|ITGB4BP|b(2)gcn|eIF-6|p27(BBP)|p27BBP	1637	0.256095	4.71788	1.75528	0.0921287	0.699701	-5.45574
chr1	40861054	40862363	-	ENSG00000179862.7	protein_coding	CITED4	163732	Cbp/p300 interacting transactivator with Glu/Asp rich carboxy-terminal domain 4	-	1310	-0.311484	5.27132	-1.75665	0.0921972	0.699701	-5.51404
chr17	82389210	82418637	-	ENSG00000181396.13	protein_coding	OGFOD3	79701	2-oxoglutarate and iron dependent oxygenase domain containing 3	C17orf101	6404	-0.251249	4.99401	-1.75486	0.0922023	0.699701	-5.51429
chr6	10492223	10629368	+	ENSG00000111846.18	protein_coding	GCNT2	2651	glucosaminyl (N-acetyl) transferase 2 (I blood group)	CCAT|CTRCT13|GCNT2C|GCNT5|IGNT|II|NACGT1|NAGCT1|ULG3|bA360O19.2|bA421M1.1	9046	-0.588621	2.21931	-1.75462	0.0922454	0.699701	-4.75935
chrX	78945332	78963727	+	ENSG00000078589.13	protein_coding	P2RY10	27334	P2Y receptor family member 10	LYPSR2|P2Y10	3576	-0.290886	5.69111	-1.75655	0.0924979	0.700759	-5.62005
chr11	96389989	96507574	+	ENSG00000183340.7	protein_coding	JRKL	8690	JRK like	HHMJG	3815	0.494309	4.09308	1.76772	0.0925072	0.700759	-5.28373
chr11	22813799	22830299	-	ENSG00000198168.9	protein_coding	SVIP	258010	small VCP interacting protein	-	5201	-0.202628	6.19854	-1.7528	0.0925632	0.700759	-5.70999
chr9	137077517	137084539	+	ENSG00000197355.11	protein_coding	UAP1L1	91373	UDP-N-acetylglucosamine pyrophosphorylase 1 like 1	-	5267	-0.334634	4.20469	-1.75143	0.0928041	0.70159	-5.29485
chr7	140453033	140479536	-	ENSG00000133606.11	protein_coding	MKRN1	23608	makorin ring finger protein 1	RNF61	5843	-0.231498	7.7051	-1.75342	0.0928818	0.70159	-5.8233
chr1	110362851	110391082	-	ENSG00000168679.18	protein_coding	SLC16A4	9122	solute carrier family 16 member 4	MCT4|MCT5	3164	1.01215	0.847287	1.75093	0.092892	0.70159	-4.4324
chr11	102347211	102378670	+	ENSG00000110330.8	protein_coding	BIRC2	329	baculoviral IAP repeat containing 2	API1|HIAP2|Hiap-2|MIHB|RNF48|c-IAP1|cIAP1	4532	0.286387	6.43746	1.75916	0.0930026	0.70159	-5.72784
chr3	3700814	4467273	-	ENSG00000144455.14	protein_coding	SUMF1	285362	sulfatase modifying factor 1	AAPA3037|FGE|UNQ3037	6944	0.291438	3.95499	1.75005	0.0930465	0.70159	-5.29155
chr16	287440	352723	-	ENSG00000103126.15	protein_coding	AXIN1	8312	axin 1	AXIN|PPP1R49	7537	0.164082	7.0184	1.7499	0.0930722	0.70159	-5.80065
chr8	125430358	125438403	+	ENSG00000173334.4	protein_coding	TRIB1	10221	tribbles pseudokinase 1	C8FW|GIG-2|GIG2|SKIP1|TRB-1|TRB1	4099	-1.42862	-0.350312	-1.74899	0.0932337	0.70159	-4.24286
chr6	26634383	26659752	-	ENSG00000181315.11	protein_coding	ZNF322	79692	zinc finger protein 322	HCG12|ZNF322A|ZNF388|ZNF489	5059	0.628627	2.0094	1.74898	0.0932353	0.70159	-4.79632
chr5	178859953	178888122	+	ENSG00000178338.11	protein_coding	ZNF354B	117608	zinc finger protein 354B	KID2	3742	0.219828	5.51931	1.74884	0.0932594	0.70159	-5.61041
chr4	112285509	112442621	+	ENSG00000073331.18	protein_coding	ALPK1	80216	alpha kinase 1	8430410J10Rik|LAK	12326	-0.312599	5.67814	-1.75439	0.0933104	0.70159	-5.59994
chr7	155297776	155310235	+	ENSG00000186480.13	protein_coding	INSIG1	3638	insulin induced gene 1	CL6	3650	-0.257587	5.8833	-1.74907	0.0933272	0.70159	-5.67271
chr17	4733531	4739928	-	ENSG00000161921.16	protein_coding	CXCL16	58191	C-X-C motif chemokine ligand 16	CXCLG16|SR-PSOX|SRPSOX	2795	-0.845443	1.00973	-1.74764	0.0934704	0.702196	-4.48656
chr22	25351418	25405377	-	ENSG00000100068.13	protein_coding	LRP5L	91355	LDL receptor related protein 5 like	-	4687	-0.230284	3.93436	-1.74715	0.0935586	0.702196	-5.29075
chr19	15114984	15125786	-	ENSG00000105135.16	protein_coding	ILVBL	10994	ilvB acetolactate synthase like	209L8|AHAS|HACL1L|ILV2H	5616	-0.220862	5.20382	-1.74688	0.0936053	0.702196	-5.5661
chr12	103237591	103496010	-	ENSG00000179088.14	protein_coding	C12orf42	374470	chromosome 12 open reading frame 42	-	4898	0.356832	3.24269	1.74654	0.0936649	0.702196	-5.0568
chr11	47437764	47449143	-	ENSG00000165917.10	protein_coding	RAPSN	5913	receptor associated protein of the synapse	CMS11|CMS4C|FADS|FADS2|RAPSYN|RNF205	1876	-1.36219	-0.211362	-1.74631	0.0937056	0.702196	-4.27982
chr12	55954105	55973317	-	ENSG00000185664.14	protein_coding	PMEL	6490	premelanosome protein	D12S53E|ME20|ME20-M|ME20M|P1|P100|PMEL17|SI|SIL|SILV|gp100	3901	0.303163	4.10059	1.74537	0.0938738	0.70301	-5.31243
chr11	134069071	134152001	+	ENSG00000166086.13	protein_coding	JAM3	83700	junctional adhesion molecule 3	JAM-2|JAM-3|JAM-C|JAMC	5305	0.414142	3.28726	1.74409	0.0941009	0.704225	-5.08307
chrX	40648305	40735858	-	ENSG00000180182.11	protein_coding	MED14	9282	mediator complex subunit 14	CRSP150|CRSP2|CSRP|CXorf4|DRIP150|EXLM1|RGR1|TRAP170	9668	-0.202571	5.96058	-1.74378	0.0941553	0.704225	-5.70503
chr16	2039815	2047866	-	ENSG00000065057.9	protein_coding	NTHL1	4913	nth like DNA glycosylase 1	FAP3|NTH1|OCTS3|hNTH1	2430	0.377836	3.18767	1.74284	0.0943234	0.704772	-5.05388
chr12	116710171	116738070	-	ENSG00000111412.6	protein_coding	C12orf49	NA	NA	NA	8678	0.271381	5.15418	1.74246	0.0943899	0.704772	-5.55849
chr2	203867771	203873965	+	ENSG00000163599.17	protein_coding	CTLA4	1493	cytotoxic T-lymphocyte associated protein 4	ALPS5|CD|CD152|CELIAC3|CTLA-4|GRD4|GSE|IDDM12	2140	-0.832834	4.51569	-1.78516	0.0944339	0.704772	-5.28884
chr9	68232003	68300035	+	ENSG00000196873.16	protein_coding	CBWD3	445571	COBW domain containing 3	bA561O23.1	11966	-0.468357	2.41213	-1.74203	0.0944675	0.704772	-4.83697
chr14	95533503	95544724	+	ENSG00000182512.5	protein_coding	GLRX5	51218	glutaredoxin 5	C14orf87|FLB4739|GRX5|PR01238|PRO1238|PRSA|SIDBA3|SPAHGC	2388	0.34399	4.36888	1.74093	0.0946625	0.705614	-5.37775
chr17	50133737	50150677	-	ENSG00000108819.11	protein_coding	PPP1R9B	84687	protein phosphatase 1 regulatory subunit 9B	PPP1R6|PPP1R9|SPINO|Spn	4343	0.230953	6.86599	1.7414	0.094795	0.705614	-5.80651
chr2	165747588	165794659	-	ENSG00000115339.14	protein_coding	GALNT3	2591	polypeptide N-acetylgalactosaminyltransferase 3	GalNAc-T3|HFTC|HFTC1|HHS	4589	0.495418	3.0242	1.73985	0.094857	0.705614	-5.00718
chr12	104117086	104138241	-	ENSG00000120837.8	protein_coding	NFYB	4801	nuclear transcription factor Y subunit beta	CBF-A|CBF-B|HAP3|NF-YB	4899	0.232715	5.39307	1.73976	0.0948722	0.705614	-5.60108
chr21	6111131	6123778	+	ENSG00000275993.3	protein_coding	SIK1B	102724428	salt inducible kinase 1B (putative)	SIK|SIK-1|SIK1|SNF1LK	4848	-1.35334	3.13225	-1.78339	0.0948795	0.705614	-4.87864
chr19	47349315	47382704	+	ENSG00000134815.19	protein_coding	DHX34	9704	DExH-box helicase 34	DDX34|HRH1	5662	0.195787	5.53943	1.73922	0.0949681	0.705775	-5.63624
chr3	111732497	111976517	+	ENSG00000144824.21	protein_coding	PHLDB2	90102	pleckstrin homology like domain family B member 2	LL5b|LL5beta	12309	1.3364	0.03309	1.73976	0.0952182	0.705775	-4.33614
chr15	90902218	90922584	+	ENSG00000196547.15	protein_coding	MAN2A2	4122	mannosidase alpha class 2A member 2	MANA2X	9763	0.225803	7.42903	1.73921	0.0952438	0.705775	-5.84229
chr1	1598012	1600135	-	ENSG00000228594.4	protein_coding	FNDC10	643988	fibronectin type III domain containing 10	C1orf233	2124	-0.367869	2.73717	-1.73759	0.0952605	0.705775	-4.95805
chr11	94415570	94493885	-	ENSG00000020922.13	protein_coding	MRE11	4361	MRE11 homolog, double strand break repair nuclease	ATLD|HNGS1|MRE11A|MRE11B	7674	0.297921	6.43476	1.75006	0.0953355	0.705775	-5.76074
chr19	44051367	44067999	+	ENSG00000178386.13	protein_coding	ZNF223	7766	zinc finger protein 223	-	3310	-0.513719	1.48403	-1.73682	0.0953996	0.705775	-4.62067
chr2	195737703	196068837	-	ENSG00000118997.14	protein_coding	DNAH7	56171	dynein axonemal heavy chain 7	-	21349	1.71485	-1.08399	1.7368	0.0954041	0.705775	-4.18667
chr17	81887835	81891586	-	ENSG00000183684.8	protein_coding	ALYREF	10189	Aly/REF export factor	ALY|ALY/REF|BEF|REF|THOC4	1583	-0.264344	5.26852	-1.73677	0.0954084	0.705775	-5.58179
chr17	57255851	57684689	+	ENSG00000153944.12	protein_coding	MSI2	124540	musashi RNA binding protein 2	MSI2H	22248	-0.186686	7.30691	-1.73607	0.0955353	0.705775	-5.83559
chr4	3244369	3271738	+	ENSG00000188981.11	protein_coding	MSANTD1	345222	Myb/SANT DNA binding domain containing 1	C4orf44	5989	1.0174	0.0413742	1.73556	0.095626	0.705775	-4.28472
chr12	120762510	120904358	-	ENSG00000157837.16	protein_coding	SPPL3	121665	signal peptide peptidase like 3	IMP2|MDHV1887|PRO4332|PSH1|PSL4	6659	-0.212565	5.57964	-1.73524	0.0956845	0.705775	-5.65014
chr6	29722775	29738528	+	ENSG00000204642.14	protein_coding	HLA-F	3134	major histocompatibility complex, class I, F	CDA12|HLA-5.4|HLA-CDA12|HLAF	4315	-2.09831	-0.416229	-1.75199	0.0957052	0.705775	-4.24524
chr7	77022925	77062552	-	ENSG00000186645.9	protein_coding	SPDYE17	102723849	speedy/RINGO cell cycle regulator family member E17	-	3730	-0.799851	0.663603	-1.73474	0.0957746	0.705775	-4.44611
chr11	57299638	57324952	-	ENSG00000149115.14	protein_coding	TNKS1BP1	85456	tankyrase 1 binding protein 1	TAB182	7149	0.247639	4.45164	1.73439	0.0958376	0.705775	-5.41433
chr5	175917873	176034680	-	ENSG00000051596.10	protein_coding	THOC3	84321	THO complex 3	THO3|hTREX45	3449	-0.363539	2.80595	-1.73393	0.0959211	0.705775	-5.04206
chr2	113437691	113496204	+	ENSG00000136682.15	protein_coding	CBWD2	150472	COBW domain containing 2	-	8411	-0.393515	4.04516	-1.73398	0.0960618	0.705775	-5.2876
chr3	43079232	43106079	-	ENSG00000144647.6	protein_coding	POMGNT2	84892	protein O-linked mannose N-acetylglucosaminyltransferase 2 (beta 1,4-)	AGO61|C3orf39|GTDC2|MDDGA8|MDDGC8	2671	-0.392134	3.53203	-1.73301	0.0960864	0.705775	-5.21043
chr22	37225270	37244448	-	ENSG00000128340.15	protein_coding	RAC2	5880	Rac family small GTPase 2	EN-7|Gx|HSPC022|p21-Rac2	2523	0.231045	8.79196	1.73695	0.0961183	0.705775	-5.88362
chr1	212363928	212414901	-	ENSG00000065600.13	protein_coding	PACC1	55248	proton activated chloride channel 1	ASOR|C1orf75|PAC|PAORAC|TMEM206|hPAC|hTMEM206	2917	-0.352423	3.77251	-1.73274	0.0961359	0.705775	-5.25016
chr7	1152071	1160759	-	ENSG00000178381.12	protein_coding	ZFAND2A	90637	zinc finger AN1-type containing 2A	AIRAP	2282	-0.337354	4.56502	-1.73282	0.0961767	0.705775	-5.42296
chr9	98120975	98192637	-	ENSG00000106789.13	protein_coding	CORO2A	7464	coronin 2A	CLIPINB|IR10|WDR2	5714	-0.235618	5.25762	-1.73226	0.0962229	0.705775	-5.59535
chrX	80669503	80809877	-	ENSG00000165288.11	protein_coding	BRWD3	254065	bromodomain and WD repeat domain containing 3	BRODL|MRX93	14234	0.181933	6.79691	1.73219	0.0962346	0.705775	-5.80374
chr1	241590102	241677376	-	ENSG00000054277.14	protein_coding	OPN3	23596	opsin 3	ECPN|PPP1R116	3724	0.500207	2.74835	1.73126	0.0964045	0.705775	-4.94882
chr19	52012765	52030240	-	ENSG00000142556.19	protein_coding	ZNF614	80110	zinc finger protein 614	-	5623	0.406987	4.10704	1.73433	0.0964272	0.705775	-5.31852
chr12	118136124	118145584	+	ENSG00000089220.5	protein_coding	PEBP1	5037	phosphatidylethanolamine binding protein 1	HCNP|HCNPpp|HEL-210|HEL-S-34|HEL-S-96|PBP|PEBP|PEBP-1|RKIP	1514	-0.178588	7.06849	-1.73112	0.0964289	0.705775	-5.83168
chr7	39566385	39610320	+	ENSG00000241127.8	protein_coding	YAE1	57002	YAE1 maturation factor of ABCE1	C7orf36|CIAB2|GK003|YAE1D1	2560	0.301598	3.15794	1.73094	0.0964615	0.705775	-5.08403
chr10	26438341	26567803	+	ENSG00000077420.16	protein_coding	APBB1IP	54518	amyloid beta precursor protein binding family B member 1 interacting protein	INAG1|PREL1|RARP1|RIAM	3843	0.220231	6.99413	1.72988	0.0966538	0.705775	-5.83248
chr19	39306566	39320863	-	ENSG00000128011.5	protein_coding	LRFN1	57622	leucine rich repeat and fibronectin type III domain containing 1	SALM2	3579	0.351599	3.50579	1.72985	0.0966589	0.705775	-5.17498
chr10	73130155	73169055	-	ENSG00000122882.11	protein_coding	ECD	11319	ecdysoneless cell cycle regulator	GCR2|HSGT1|SGT1	3675	-0.197559	5.09411	-1.72966	0.0966944	0.705775	-5.58359
chr10	112424428	112446917	-	ENSG00000023041.11	protein_coding	ZDHHC6	64429	zinc finger DHHC-type palmitoyltransferase 6	DHHC-6|DHHC6|ZNF376	3748	-0.152123	6.79688	-1.72965	0.0966963	0.705775	-5.81598
chr17	47323290	47441312	+	ENSG00000178852.16	protein_coding	EFCAB13	124989	EF-hand calcium binding domain 13	C17orf57	6678	0.334231	3.96601	1.72866	0.0968771	0.706177	-5.27462
chr3	169966635	169998373	+	ENSG00000008952.17	protein_coding	SEC62	7095	SEC62 homolog, preprotein translocation factor	Dtrp1|HTP1|TLOC1|TP-1	7928	-0.183248	6.85884	-1.72819	0.0969628	0.706177	-5.81216
chr16	27459555	27549913	-	ENSG00000077235.18	protein_coding	GTF3C1	2975	general transcription factor IIIC subunit 1	TFIIIC|TFIIIC220|TFIIICalpha	11562	0.169256	6.67763	1.72802	0.0969928	0.706177	-5.81688
chr17	66302613	66810743	+	ENSG00000154229.12	protein_coding	PRKCA	5578	protein kinase C alpha	AAG6|PKC-alpha|PKCA|PKCI+/-|PKCalpha|PRKACA	11175	0.201487	8.05806	1.728	0.0969962	0.706177	-5.88007
chr3	139355600	139389680	-	ENSG00000184432.10	protein_coding	COPB2	9276	COPI coat complex subunit beta 2	MCPH19|beta'-COP	8125	0.216184	6.40882	1.72727	0.0971298	0.706177	-5.78486
chr6	44298731	44313347	-	ENSG00000124608.5	protein_coding	AARS2	57505	alanyl-tRNA synthetase 2, mitochondrial	AARSL|COXPD8|LKENP|MT-ALARS|MTALARS	5242	0.186138	5.63967	1.72636	0.0972953	0.706177	-5.67718
chr2	219249710	219278170	-	ENSG00000127824.14	protein_coding	TUBA4A	7277	tubulin alpha 4a	ALS22|H2-ALPHA|TUBA1	3966	0.560448	6.31896	1.76916	0.0973379	0.706177	-5.73201
chr1	61742477	62178675	+	ENSG00000132849.21	protein_coding	PATJ	10207	PATJ crumbs cell polarity complex component	Cipp|INADL|InaD-like|hINADL	11919	-0.270651	5.99502	-1.72933	0.097371	0.706177	-5.72213
chr9	38392702	38398661	+	ENSG00000137124.8	protein_coding	ALDH1B1	219	aldehyde dehydrogenase 1 family member B1	ALDH5|ALDHX	3117	0.569166	1.51232	1.72569	0.0974179	0.706177	-4.67028
chr3	112086335	112131004	+	ENSG00000114529.13	protein_coding	C3orf52	79669	chromosome 3 open reading frame 52	TTMP	6021	0.413059	3.16947	1.72561	0.0974326	0.706177	-5.12444
chr14	90847861	91060641	-	ENSG00000100784.12	protein_coding	RPS6KA5	9252	ribosomal protein S6 kinase A5	MSK1|MSPK1|RLPK	27982	-0.237773	5.25358	-1.72546	0.0974609	0.706177	-5.6192
chr1	150996086	151008375	-	ENSG00000143409.15	protein_coding	MINDY1	55793	MINDY lysine 48 deubiquitinase 1	FAM63A|MINDY-1	3792	0.301243	6.10079	1.73747	0.097477	0.706177	-5.75386
chr1	109494052	109502932	+	ENSG00000174151.15	protein_coding	CYB561D1	284613	cytochrome b561 family member D1	-	5690	0.21892	6.44665	1.72507	0.0975321	0.706177	-5.79878
chr16	77190835	77202398	+	ENSG00000103111.15	protein_coding	MON1B	22879	MON1 homolog B, secretory trafficking associated	HSRG1|SAND2|SRG1	6935	0.164489	6.44281	1.72448	0.097641	0.706177	-5.79228
chr12	64713445	64759431	-	ENSG00000135677.11	protein_coding	GNS	2799	glucosamine (N-acetyl)-6-sulfatase	G6S	6268	0.181978	5.72749	1.72356	0.0978083	0.706177	-5.70453
chr3	48403854	48430086	-	ENSG00000164050.13	protein_coding	PLXNB1	5364	plexin B1	PLEXIN-B1|PLXN5|SEP	9768	0.735173	1.63585	1.72337	0.0978446	0.706177	-4.66305
chr1	212432920	212446379	+	ENSG00000117691.10	protein_coding	NENF	29937	neudesin neurotrophic factor	CIR2|SCIRP10|SPUF	1264	0.267507	3.96797	1.72334	0.0978502	0.706177	-5.29816
chr11	67991100	68004982	-	ENSG00000110057.8	protein_coding	UNC93B1	81622	unc-93 homolog B1, TLR signaling regulator	IIAE1|UNC93|UNC93B|Unc-93B1	3536	-0.443895	4.16579	-1.72973	0.0978816	0.706177	-5.30551
chr4	75724577	75814286	+	ENSG00000138768.15	protein_coding	USO1	8615	USO1 vesicle transport factor	P115|TAP|VDP	4604	-0.143165	6.28723	-1.72312	0.0978898	0.706177	-5.77023
chr11	18704312	18726230	-	ENSG00000179057.14	protein_coding	IGSF22	283284	immunoglobulin superfamily member 22	IGFN2	4834	-0.62493	0.857816	-1.72271	0.0979652	0.706177	-4.51441
chrM	3307	4262	+	ENSG00000198888.2	protein_coding	MT-ND1	NA	NA	NA	956	-0.303909	11.2646	-1.74344	0.0980907	0.706177	-5.89443
chr16	3129777	3142804	+	ENSG00000085644.14	protein_coding	ZNF213	7760	zinc finger protein 213	CR53|ZKSCAN21|ZSCAN53	6442	0.344919	3.69357	1.72187	0.0981191	0.706177	-5.29655
chr3	10115675	10127190	+	ENSG00000254999.4	protein_coding	BRK1	55845	BRICK1 subunit of SCAR/WAVE actin nucleating complex	C3orf10|HSPC300|MDS027|hHBrk1	1150	0.23019	6.05948	1.72149	0.0981907	0.706177	-5.73855
chr1	26693236	26782104	+	ENSG00000117713.20	protein_coding	ARID1A	8289	AT-rich interaction domain 1A	B120|BAF250|BAF250a|BM029|C1orf4|CSS2|ELD|MRD14|OSA1|P270|SMARCF1|hELD|hOSA1	15939	0.151199	8.42558	1.72136	0.098214	0.706177	-5.90117
chr1	46261196	46303608	-	ENSG00000132128.16	protein_coding	LRRC41	10489	leucine rich repeat containing 41	MUF1|PP7759	8606	0.195038	5.62695	1.72117	0.098248	0.706177	-5.69328
chr16	28878405	28904466	+	ENSG00000196296.14	protein_coding	ATP2A1	487	ATPase sarcoplasmic/endoplasmic reticulum Ca2+ transporting 1	ATP2A|SERCA1	4544	0.694768	0.429553	1.72019	0.0984295	0.70705	-4.40778
chr3	151085697	151437072	+	ENSG00000144893.12	protein_coding	MED12L	116931	mediator complex subunit 12L	NIZIDS|NOPAR|TNRC11L|TRALP|TRALPUSH	12619	-0.786127	0.744732	-1.71984	0.098494	0.707083	-4.50291
chr11	66563464	66568841	-	ENSG00000174080.11	protein_coding	CTSF	8722	cathepsin F	CATSF|CLN13	2905	-0.315703	5.0407	-1.72203	0.0986701	0.707567	-5.57274
chr19	53066606	53103436	-	ENSG00000170949.17	protein_coding	ZNF160	90338	zinc finger protein 160	F11|HKr18|HZF5|KR18	8511	-0.187504	6.66062	-1.71867	0.0987099	0.707567	-5.81659
chr1	27872543	27886685	+	ENSG00000130775.16	protein_coding	THEMIS2	9473	thymocyte selection associated family member 2	C1orf38|ICB-1|ICB1	4621	0.57035	6.31702	1.76153	0.0987446	0.707567	-5.74908
chr5	132996985	133026604	-	ENSG00000155329.12	protein_coding	ZCCHC10	54819	zinc finger CCHC-type containing 10	-	2559	-0.290842	3.8339	-1.71789	0.0988543	0.707567	-5.28401
chr16	57994668	58000453	-	ENSG00000166188.2	protein_coding	ZNF319	57567	zinc finger protein 319	ZFP319	4274	0.244088	4.60391	1.71727	0.0989697	0.707567	-5.47352
chr11	64316460	64317559	-	ENSG00000173113.7	protein_coding	TRMT112	51504	tRNA methyltransferase subunit 11-2	HSPC152|HSPC170|TRM112|TRMT11-2|hTrm112	1100	0.248197	5.44647	1.71715	0.0989932	0.707567	-5.66877
chr1	148531385	148679742	-	ENSG00000270629.6	protein_coding	NBPF14	25832	NBPF member 14	DJ328E19.C1.1|NBPF	11985	0.279332	4.04834	1.71701	0.0990185	0.707567	-5.3037
chr11	82899975	82958277	+	ENSG00000165490.13	protein_coding	DDIAS	220042	DNA damage induced apoptosis suppressor	C11orf82|noxin	5339	1.10587	0.671272	1.71689	0.0990414	0.707567	-4.36216
chr20	3927309	4015558	-	ENSG00000101236.17	protein_coding	RNF24	11237	ring finger protein 24	G1L	7644	0.222238	5.12304	1.71641	0.0991289	0.707681	-5.58427
chr19	2274631	2282175	-	ENSG00000188305.6	protein_coding	PEAK3	374872	PEAK family member 3	C19orf35	2564	1.00755	0.212111	1.71541	0.0993153	0.707681	-4.36282
chr11	62670273	62673686	+	ENSG00000204922.5	protein_coding	UQCC3	790955	ubiquinol-cytochrome c reductase complex assembly factor 3	C11orf83|CCDS41658.1|MC3DN9|UNQ655	2397	0.520793	2.69467	1.71529	0.0993375	0.707681	-4.95389
chr3	172039578	172401669	+	ENSG00000075420.13	protein_coding	FNDC3B	64778	fibronectin type III domain containing 3B	FAD104|PRO4979|YVTM2421	13324	-0.28686	4.90883	-1.71527	0.0993416	0.707681	-5.54961
chr22	17178790	17258235	-	ENSG00000093072.18	protein_coding	ADA2	51816	adenosine deaminase 2	ADGF|CECR1|IDGFL|PAN|SNEDS|VAIHS	8704	0.162473	7.897	1.71473	0.0994431	0.707681	-5.89854
chr1	40040233	40072649	+	ENSG00000131236.17	protein_coding	CAP1	10487	cyclase associated actin cytoskeleton regulatory protein 1	CAP|CAP1-PEN	3814	0.180845	8.27071	1.71469	0.0994492	0.707681	-5.90926
chr14	24147548	24166452	+	ENSG00000259529.2	protein_coding	AL136295.5	NA	NA	NA	5574	0.931175	0.359752	1.71395	0.0995875	0.707681	-4.3846
chr16	71281389	71289715	-	ENSG00000180917.18	protein_coding	CMTR2	55783	cap methyltransferase 2	AFT|FTSJD1|HMTr2|MTr2	7582	0.319445	5.07141	1.71779	0.09959	0.707681	-5.58097
chr21	44885953	44931989	-	ENSG00000160255.18	protein_coding	ITGB2	3689	integrin subunit beta 2	CD18|LAD|LCAMB|LFA-1|MAC-1|MF17|MFI7	6869	0.181789	9.4251	1.71375	0.0996253	0.707681	-5.92493
chr4	499210	540200	+	ENSG00000174227.16	protein_coding	PIGG	54872	phosphatidylinositol glycan anchor biosynthesis class G	GPI7|LAS21|MRT53|PRO4405|RLGS1930	10899	0.168872	7.20291	1.71334	0.0997009	0.707681	-5.8671
chr7	144451941	144836395	-	ENSG00000196511.14	protein_coding	TPK1	27010	thiamin pyrophosphokinase 1	HTPK1|PP20|THMD5	8442	-0.254148	4.04726	-1.71287	0.0997889	0.707681	-5.34055
chr2	68157888	68176238	+	ENSG00000115946.8	protein_coding	PNO1	56902	partner of NOB1 homolog	KHRBP1|RRP20	2630	-0.251827	4.39763	-1.71219	0.099917	0.707681	-5.3971
chr14	50532509	50634017	+	ENSG00000198513.13	protein_coding	ATL1	51062	atlastin GTPase 1	AD-FSP|FSP1|GBP3|HSN1D|SPG3|SPG3A|atlastin1	7997	0.542789	2.07056	1.71161	0.100025	0.707681	-4.78012
chr3	196468783	196503768	-	ENSG00000163961.4	protein_coding	RNF168	165918	ring finger protein 168	RIDL|hRNF168	5347	-0.243775	5.23843	-1.7116	0.100026	0.707681	-5.5965
chr11	33077188	33162371	-	ENSG00000176102.13	protein_coding	CSTF3	1479	cleavage stimulation factor subunit 3	CSTF-77	4513	-0.246214	5.15928	-1.7115	0.100045	0.707681	-5.59123
chr19	38915266	38930763	-	ENSG00000104835.15	protein_coding	SARS2	54938	seryl-tRNA synthetase 2, mitochondrial	SARS|SARSM|SERS|SYS|SerRS|SerRSmt|mtSerRS	3098	-0.319912	2.85183	-1.71142	0.10006	0.707681	-5.05533
chr7	150625375	150632648	-	ENSG00000133561.15	protein_coding	GIMAP6	474344	GTPase, IMAP family member 6	IAN-2|IAN-6|IAN2|IAN6	3913	0.214964	8.0109	1.71243	0.100089	0.707681	-5.90586
chr8	406428	477967	+	ENSG00000147364.17	protein_coding	FBXO25	26260	F-box protein 25	FBX25	11438	0.180495	6.03183	1.71045	0.100241	0.707681	-5.76299
chr11	18455824	18479601	+	ENSG00000166800.10	protein_coding	LDHAL6A	160287	lactate dehydrogenase A like 6A	LDH6A	2587	0.799577	1.31857	1.71041	0.100249	0.707681	-4.54239
chr4	88725955	89111398	-	ENSG00000138640.15	protein_coding	FAM13A	10144	family with sequence similarity 13 member A	ARHGAP48|FAM13A1	13215	-0.561413	5.97611	-1.75021	0.100304	0.707681	-5.66932
chr1	23359448	23369836	-	ENSG00000125945.15	protein_coding	ZNF436	80818	zinc finger protein 436	ZNF|Zfp46	4786	0.350578	3.67958	1.71005	0.100317	0.707681	-5.23144
chr11	644233	706715	-	ENSG00000177030.17	protein_coding	DEAF1	10522	DEAF1 transcription factor	MRD24|NEDHELS|NUDR|SPN|VSVS|ZMYND5	4142	-0.187507	5.69717	-1.7096	0.100402	0.707696	-5.72049
chr6	157981863	158099176	+	ENSG00000078269.15	protein_coding	SYNJ2	8871	synaptojanin 2	INPP5H	12517	0.187473	6.65656	1.7094	0.100439	0.707696	-5.83779
chr10	26973793	27100494	-	ENSG00000107890.17	protein_coding	ANKRD26	22852	ankyrin repeat domain 26	THC2|bA145E8.1	13564	0.222083	5.2368	1.70795	0.100712	0.709023	-5.60985
chr12	69470349	69579789	+	ENSG00000166225.8	protein_coding	FRS2	10818	fibroblast growth factor receptor substrate 2	FRS1A|FRS2A|FRS2alpha|SNT|SNT-1|SNT1	7242	-0.28584	5.58686	-1.71051	0.100748	0.709023	-5.67231
chr1	74733152	74766678	+	ENSG00000162623.16	protein_coding	TYW3	127253	tRNA-yW synthesizing protein 3 homolog	C1orf171	4616	-0.212789	5.60958	-1.70675	0.100938	0.709099	-5.69009
chr16	70289663	70335305	+	ENSG00000157349.17	protein_coding	DDX19B	11269	DEAD-box helicase 19B	DBP5|DDX19|RNAh	4455	-0.27123	4.32753	-1.70624	0.101034	0.709099	-5.4405
chr17	7351889	7354944	+	ENSG00000213859.6	protein_coding	KCTD11	147040	potassium channel tetramerization domain containing 11	C17orf36|KCASH1|REN|REN/KCTD11	3056	0.465146	2.55871	1.70609	0.101063	0.709099	-4.98245
chr10	46911396	47002488	+	ENSG00000204179.10	protein_coding	PTPN20	26095	protein tyrosine phosphatase non-receptor type 20	CT126|PTPN20A|PTPN20B|bA142I17.1|bA42B19.1	4506	1.41817	-0.809289	1.70584	0.101111	0.709099	-4.27178
chr1	25222276	25232502	-	ENSG00000117614.10	protein_coding	SYF2	25949	SYF2 pre-mRNA splicing factor	CBPIN|NTC31|P29|fSAP29	3773	-0.187498	6.38674	-1.70545	0.101183	0.709099	-5.8053
chr16	29662979	29670876	+	ENSG00000197471.12	protein_coding	SPN	6693	sialophorin	CD43|GALGP|GPL115|LSN	7382	0.42731	6.96002	1.73974	0.101379	0.709099	-5.83227
chr1	165827614	165911618	+	ENSG00000143179.16	protein_coding	UCK2	7371	uridine-cytidine kinase 2	TSA903|UK|UMPK	6984	-0.875918	-0.498357	-1.70421	0.101419	0.709099	-4.42614
chr1	93448131	93554661	+	ENSG00000137942.16	protein_coding	FNBP1L	54874	formin binding protein 1 like	C1orf39|TOCA1	5798	-0.745617	0.928588	-1.70375	0.101505	0.709099	-4.52912
chr20	36876121	36894235	+	ENSG00000101342.10	protein_coding	TLDC2	140711	TBC/LysM-associated domain containing 2	C20orf118	2553	0.357055	3.25091	1.70375	0.101505	0.709099	-5.13286
chr13	49247925	49293485	+	ENSG00000102543.14	protein_coding	CDADC1	81602	cytidine and dCMP deaminase domain containing 1	NYD-SP15|bA103J18.1	3863	0.318697	3.82414	1.70353	0.101547	0.709099	-5.27467
chr8	28600469	28755599	+	ENSG00000012232.9	protein_coding	EXTL3	2137	exostosin like glycosyltransferase 3	BOTV|EXTL1L|EXTR1|ISDNA|REGR|RPR	13046	0.248411	4.9184	1.70331	0.101589	0.709099	-5.5763
chr7	100049774	100065040	+	ENSG00000166529.15	protein_coding	ZSCAN21	7589	zinc finger and SCAN domain containing 21	NY-REN-21|ZNF38|Zipro1	2142	0.393353	2.39599	1.7033	0.10159	0.709099	-4.93254
chr9	35056064	35072627	-	ENSG00000165280.16	protein_coding	VCP	7415	valosin containing protein	CDC48|TERA|p97	4816	0.155519	7.11212	1.70329	0.101592	0.709099	-5.88353
chr12	9067664	9116229	-	ENSG00000175899.15	protein_coding	A2M	2	alpha-2-macroglobulin	A2MD|CPAMD5|FWP007|S863-7	6318	1.17417	1.3719	1.71685	0.1016	0.709099	-4.58715
chr2	86784610	86808396	-	ENSG00000153563.16	protein_coding	CD8A	925	CD8a molecule	CD8|Leu2|p32	3049	-0.893555	2.31148	-1.72154	0.101935	0.710758	-4.88402
chr4	83535914	83605875	+	ENSG00000138678.11	protein_coding	GPAT3	84803	glycerol-3-phosphate acyltransferase 3	AGPAT 10|AGPAT10|AGPAT8|AGPAT9|HMFN0839|LPAAT-theta|MAG1	3623	-1.02338	0.413581	-1.70126	0.101977	0.710758	-4.40505
chr1	40258041	40294180	+	ENSG00000084073.10	protein_coding	ZMPSTE24	10269	zinc metallopeptidase STE24	FACE-1|FACE1|HGPS|PRO1|STE24|Ste24p	4022	0.241603	4.38122	1.70086	0.102053	0.710758	-5.41576
chr17	31391675	31538211	+	ENSG00000131242.18	protein_coding	RAB11FIP4	84440	RAB11 family interacting protein 4	FIP4-Rab11|RAB11-FIP4	15326	0.198097	6.86129	1.70073	0.102079	0.710758	-5.8664
chr15	75355207	75368612	-	ENSG00000140400.17	protein_coding	MAN2C1	4123	mannosidase alpha class 2C member 1	MAN6A8|MANA|MANA1	9124	-0.194458	7.94143	-1.69892	0.102424	0.712741	-5.92274
chr17	39173453	39197703	-	ENSG00000067191.16	protein_coding	CACNB1	782	calcium voltage-gated channel auxiliary subunit beta 1	CAB1|CACNLB1|CCHLB1	7097	0.359974	3.70536	1.69838	0.102527	0.713038	-5.31134
chr13	32315086	32400268	+	ENSG00000139618.16	protein_coding	BRCA2	675	BRCA2 DNA repair associated	BRCC2|BROVCA2|FACD|FAD|FAD1|FANCD|FANCD1|GLM3|PNCA2|XRCC11	12803	-0.490155	2.72518	-1.69779	0.10264	0.713086	-5.02015
chr14	70641916	70675366	+	ENSG00000133985.3	protein_coding	TTC9	23508	tetratricopeptide repeat domain 9	TTC9A	5094	0.298237	6.40165	1.71106	0.102655	0.713086	-5.82336
chr1	182598623	182604389	-	ENSG00000143333.7	protein_coding	RGS16	6004	regulator of G protein signaling 16	A28-RGS14|A28-RGS14P|RGS-R	2408	-1.12489	0.00829454	-1.69699	0.102792	0.713528	-4.39483
chr10	95605941	95656711	-	ENSG00000059573.9	protein_coding	ALDH18A1	5832	aldehyde dehydrogenase 18 family member A1	ADCL3|ARCL3A|GSAS|P5CS|PYCS|SPG9|SPG9A|SPG9B	3759	0.189254	5.68413	1.69675	0.10284	0.713528	-5.73182
chr11	695428	705028	+	ENSG00000177042.14	protein_coding	TMEM80	283232	transmembrane protein 80	-	4071	0.181679	5.38232	1.69577	0.103026	0.713709	-5.6833
chr19	13882348	13906452	-	ENSG00000132016.11	protein_coding	C19orf57	NA	NA	NA	3840	0.85654	0.769313	1.69576	0.103028	0.713709	-4.49363
chr9	120815496	120842951	-	ENSG00000095261.14	protein_coding	PSMD5	5711	proteasome 26S subunit, non-ATPase 5	S5B	4399	-0.215812	5.42342	-1.69566	0.103048	0.713709	-5.67977
chr2	74529725	74533332	+	ENSG00000115317.12	protein_coding	HTRA2	27429	HtrA serine peptidase 2	MGCA8|OMI|PARK13|PRSS25	2617	0.292106	4.52911	1.69478	0.103216	0.714278	-5.47925
chr13	24764169	24879921	+	ENSG00000132972.19	protein_coding	RNF17	56163	ring finger protein 17	Mmip-2|SPATA23|TDRD4	5617	-2.65153	-2.14919	-1.70808	0.103283	0.714278	-4.22311
chr5	95652181	95698711	-	ENSG00000145757.16	protein_coding	SPATA9	83890	spermatogenesis associated 9	NYD-SP16	2926	-0.953953	-0.258876	-1.69429	0.103311	0.714278	-4.37168
chr20	17613678	17682295	-	ENSG00000125844.16	protein_coding	RRBP1	6238	ribosome binding protein 1	ES/130|ES130|RRp|hES	6980	0.222689	5.61105	1.6939	0.103387	0.714383	-5.73346
chr3	184710364	184712064	-	ENSG00000177383.5	protein_coding	MAGEF1	64110	MAGE family member F1	MAGE-F1	1701	0.232876	4.59948	1.69326	0.103509	0.714664	-5.50943
chr3	9890574	9894349	+	ENSG00000171135.15	protein_coding	JAGN1	84522	jagunal homolog 1	GL009|SCN6	1779	0.261393	4.25363	1.69306	0.103549	0.714664	-5.42239
chr16	28553915	28591790	+	ENSG00000176476.9	protein_coding	SGF29	112869	SAGA complex associated factor 29	CCDC101|STAF36|TDRD29	2124	-0.239368	5.50378	-1.69246	0.103664	0.71473	-5.71533
chr3	52812962	52830688	-	ENSG00000055955.17	protein_coding	ITIH4	3700	inter-alpha-trypsin inhibitor heavy chain 4	GP120|H4P|IHRP|ITI-HC4|ITIHL1|PK-120|PK120	4659	-0.5309	1.90259	-1.69171	0.103809	0.71473	-4.78842
chr14	22883222	22887678	+	ENSG00000139890.10	protein_coding	REM2	161253	RRAD and GEM like GTPase 2	-	2240	-0.33505	3.43139	-1.69159	0.103833	0.71473	-5.20343
chr20	435480	462543	-	ENSG00000125875.14	protein_coding	TBC1D20	128637	TBC1 domain family member 20	C20orf140|WARBM4	5821	0.180501	6.60152	1.69124	0.1039	0.71473	-5.86218
chr2	112645939	112663825	+	ENSG00000144136.11	protein_coding	SLC20A1	6574	solute carrier family 20 member 1	GLVR1|Glvr-1|PIT1|PiT-1	5493	0.174744	6.6282	1.69119	0.103909	0.71473	-5.86675
chr15	77984036	78077724	-	ENSG00000167202.11	protein_coding	TBC1D2B	23102	TBC1 domain family member 2B	-	9763	0.163956	6.76473	1.69112	0.103922	0.71473	-5.87282
chr1	11106535	11262551	-	ENSG00000198793.13	protein_coding	MTOR	2475	mechanistic target of rapamycin kinase	FRAP|FRAP1|FRAP2|RAFT1|RAPT1|SKS	12163	0.123491	7.42124	1.69078	0.103988	0.714768	-5.91788
chr2	219219380	219229717	-	ENSG00000198925.12	protein_coding	ATG9A	79065	autophagy related 9A	APG9L1|MGD3208|mATG9	4724	0.227271	5.43159	1.69037	0.104067	0.714893	-5.70554
chr13	21176658	21179084	+	ENSG00000173141.5	protein_coding	MRPL57	78988	mitochondrial ribosomal protein L57	MRP63|bMRP63	2233	-0.197796	5.01972	-1.6899	0.104159	0.715108	-5.61904
chr3	48918821	48986382	+	ENSG00000177479.19	protein_coding	ARIH2	10425	ariadne RBR E3 ubiquitin protein ligase 2	ARI2|TRIAD1	8017	-0.131384	7.25993	-1.68896	0.104342	0.715624	-5.91023
chr8	123319850	123416350	-	ENSG00000156802.13	protein_coding	ATAD2	29028	ATPase family AAA domain containing 2	ANCCA|CT137|PRO2000	7100	-0.248548	5.03553	-1.68845	0.104441	0.715624	-5.60025
chr12	132822187	132956304	-	ENSG00000072609.17	protein_coding	CHFR	55743	checkpoint with forkhead and ring finger domains	RNF116|RNF196	17127	-0.155881	7.05081	-1.68844	0.104443	0.715624	-5.90057
chr5	157137424	157159019	-	ENSG00000155868.8	protein_coding	MED7	9443	mediator complex subunit 7	ARC34|CRSP33|CRSP9	2776	0.292511	3.6648	1.68826	0.104477	0.715624	-5.2712
chr9	137241287	137243707	+	ENSG00000188229.6	protein_coding	TUBB4B	10383	tubulin beta 4B class IVb	Beta2|LCAEOD|TUBB2|TUBB2C	2037	1.03768	5.48027	1.73252	0.104719	0.716865	-5.63075
chr3	15450133	15521751	-	ENSG00000206561.13	protein_coding	COLQ	8292	collagen like tail subunit of asymmetric acetylcholinesterase	CMS5|EAD	4175	0.440568	2.60511	1.68624	0.10487	0.717128	-5.02783
chr17	41825057	41836260	-	ENSG00000141698.17	protein_coding	NT5C3B	115024	5'-nucleotidase, cytosolic IIIB	NT5C3L|cN-IIIB	2851	-0.193885	5.01046	-1.68619	0.104879	0.717128	-5.63343
chrX	153802166	153830565	-	ENSG00000067840.12	protein_coding	PDZD4	57595	PDZ domain containing 4	LNX5|LU1|PDZK4|PDZRN4L	4341	0.660949	5.05261	1.726	0.104983	0.71722	-5.59734
chr7	128790757	128822132	+	ENSG00000128596.17	protein_coding	CCDC136	64753	coiled-coil domain containing 136	NAG6	6238	0.269857	4.30846	1.6855	0.105014	0.71722	-5.48711
chrX	155489011	155719098	-	ENSG00000185973.12	protein_coding	TMLHE	55217	trimethyllysine hydroxylase, epsilon	AUTSX6|BBOX2|TMLD|TMLH|TMLHED|XAP130	5111	-0.29528	3.53266	-1.68498	0.105116	0.717321	-5.28063
chr16	88453280	88537031	+	ENSG00000179588.9	protein_coding	ZFPM1	161882	zinc finger protein, FOG family member 1	FOG|FOG1|ZC2HC11A|ZNF408|ZNF89A	6162	-0.219472	5.15882	-1.68469	0.105172	0.717321	-5.63472
chr7	43997897	44010122	+	ENSG00000136206.4	protein_coding	SPDYE1	285955	speedy/RINGO cell cycle regulator family member E1	Ringo1|SPDYB2L2|SPDYE|WBSCR19	2891	0.550349	1.53234	1.68447	0.105215	0.717321	-4.71502
chr14	33924227	34462774	-	ENSG00000129521.15	protein_coding	EGLN3	112399	egl-9 family hypoxia inducible factor 3	HIFP4H3|HIFPH3|PHD3	7363	-1.29152	0.453749	-1.69863	0.105314	0.717321	-4.5551
chr8	17027238	17122642	+	ENSG00000155970.12	protein_coding	MICU3	286097	mitochondrial calcium uptake family member 3	EFHA2	4604	-0.416884	3.43358	-1.68363	0.105379	0.717321	-5.17714
chr12	7089587	7109238	-	ENSG00000139178.11	protein_coding	C1RL	51279	complement C1r subcomponent like	C1RL1|C1RLP|C1r-LP|CLSPa	4979	0.18212	5.21901	1.68356	0.105394	0.717321	-5.67399
chr15	44711487	44718877	+	ENSG00000166710.20	protein_coding	B2M	567	beta-2-microglobulin	IMD43	6079	0.435279	9.17867	1.71966	0.105672	0.718378	-5.92404
chr5	65148738	65481920	-	ENSG00000049192.15	protein_coding	ADAMTS6	11174	ADAM metallopeptidase with thrombospondin type 1 motif 6	ADAM-TS 6|ADAM-TS6|ADAMTS-6	8565	-0.634546	2.73607	-1.68773	0.105826	0.718378	-5.02137
chr12	109116595	109268226	+	ENSG00000076555.15	protein_coding	ACACB	32	acetyl-CoA carboxylase beta	ACC2|ACCB|HACC275	14505	0.232005	5.58464	1.68119	0.105859	0.718378	-5.73924
chr9	93096217	93113283	+	ENSG00000165233.18	protein_coding	CARD19	84270	caspase recruitment domain family member 19	BinCARD|C9orf89	3082	-0.291172	5.27802	-1.68404	0.105881	0.718378	-5.68882
chr19	43912624	43935282	-	ENSG00000124459.12	protein_coding	ZNF45	7596	zinc finger protein 45	KOX5|ZNF13	4402	-0.190692	5.30758	-1.68041	0.106012	0.718378	-5.68416
chr15	88467453	88480776	+	ENSG00000181991.16	protein_coding	MRPS11	64963	mitochondrial ribosomal protein S11	HCC-2|MRP-S11|S11mt	5628	0.210119	4.37859	1.68025	0.106043	0.718378	-5.48328
chr5	177707981	177783398	-	ENSG00000170074.19	protein_coding	FAM153A	285596	family with sequence similarity 153 member A	NY-REN-7	8528	-0.617223	6.27838	-1.72159	0.106079	0.718378	-5.74986
chr1	25430858	25500209	+	ENSG00000204178.11	protein_coding	MACO1	55219	macoilin 1	MACOILIN|TMEM57	3979	-0.175517	5.70622	-1.6798	0.106132	0.718378	-5.76293
chr1	226231149	226309869	-	ENSG00000183814.15	protein_coding	LIN9	286826	lin-9 DREAM MuvB core complex component	BARA|BARPsv|Lin-9|TGS|TGS1|TGS2	4442	-0.366712	3.16945	-1.67961	0.106169	0.718378	-5.153
chr8	73008864	73048123	+	ENSG00000147601.14	protein_coding	TERF1	7013	telomeric repeat binding factor 1	PIN2|TRBF1|TRF|TRF1|hTRF1-AS|t-TRF1	8832	-0.258739	4.10639	-1.67949	0.106193	0.718378	-5.41246
chr11	74000277	74009085	-	ENSG00000175564.13	protein_coding	UCP3	7352	uncoupling protein 3	SLC25A9	3338	-0.315881	3.54144	-1.67902	0.106284	0.718378	-5.29571
chr19	52397849	52418412	+	ENSG00000167555.14	protein_coding	ZNF528	84436	zinc finger protein 528	-	8530	0.252017	5.52159	1.67858	0.106371	0.718378	-5.71815
chr16	29816152	29822489	+	ENSG00000280789.2	protein_coding	PAGR1	79447	PAXIP1 associated glutamate rich protein 1	C16orf53|GAS|PA1	3874	0.300728	4.24252	1.67851	0.106386	0.718378	-5.42532
chr14	67533290	67589612	+	ENSG00000054690.14	protein_coding	PLEKHH1	57475	pleckstrin homology, MyTH4 and FERM domain containing H1	-	10828	-0.888812	0.505212	-1.67843	0.106402	0.718378	-4.48046
chr3	37861880	37984469	+	ENSG00000144677.15	protein_coding	CTDSPL	10217	CTD small phosphatase like	C3orf8|HYA22|PSR1|RBSP3|SCP3	5876	0.409861	2.29565	1.67787	0.106512	0.718675	-4.94189
chr19	18571730	18577550	+	ENSG00000221983.8	protein_coding	UBA52	7311	ubiquitin A-52 residue ribosomal protein fusion product 1	CEP52|HUBCEP52|L40|RPL40	4306	0.161075	9.58711	1.67737	0.106609	0.718675	-5.98285
chr18	8609437	8639382	+	ENSG00000206418.4	protein_coding	RAB12	201475	RAB12, member RAS oncogene family	-	2476	-0.253847	4.97008	-1.67699	0.106685	0.718675	-5.6213
chrX	74421493	74533917	+	ENSG00000147100.11	protein_coding	SLC16A2	6567	solute carrier family 16 member 2	AHDS|DXS128|DXS128E|MCT 7|MCT 8|MCT7|MCT8|MRX22|XPCT	4292	-0.862414	0.0313267	-1.67632	0.106818	0.718675	-4.46165
chr4	1715952	1721358	-	ENSG00000168936.11	protein_coding	TMEM129	92305	transmembrane protein 129, E3 ubiquitin ligase	D4S2561E	3442	0.181588	5.98716	1.67631	0.106819	0.718675	-5.81033
chr16	1972053	1982929	+	ENSG00000183751.15	protein_coding	TBL3	10607	transducin beta like 3	SAZD|UTP13	7119	-0.192306	5.22312	-1.67626	0.10683	0.718675	-5.69664
chr11	33703010	33736479	-	ENSG00000085063.17	protein_coding	CD59	966	CD59 molecule (CD59 blood group)	16.3A5|1F5|EJ16|EJ30|EL32|G344|HRF-20|HRF20|MAC-IP|MACIF|MEM43|MIC11|MIN1|MIN2|MIN3|MIRL|MSK21|p18-20	10557	0.209025	5.13219	1.67605	0.106872	0.718675	-5.65088
chrX	71301750	71305371	+	ENSG00000147166.11	protein_coding	ITGB1BP2	26548	integrin subunit beta 1 binding protein 2	CHORDC3|ITGB1BP|MELUSIN|MSTP015	2185	-0.479942	2.20901	-1.67565	0.106951	0.718748	-4.8591
chr4	143184917	143223874	+	ENSG00000170185.10	protein_coding	USP38	84640	ubiquitin specific peptidase 38	HP43.8KD	7831	0.214748	5.81574	1.67537	0.107005	0.718748	-5.76543
chr5	179550554	179610012	+	ENSG00000176783.15	protein_coding	RUFY1	80230	RUN and FYVE domain containing 1	RABIP4|ZFYVE12	5901	-0.164495	5.69171	-1.67488	0.107104	0.719002	-5.77386
chr12	7919230	7936187	-	ENSG00000059804.16	protein_coding	SLC2A3	6515	solute carrier family 2 member 3	GLUT3	6071	-0.73367	7.2329	-1.71609	0.107695	0.722331	-5.86618
chr17	74609885	74623738	-	ENSG00000186407.7	protein_coding	CD300E	342510	CD300e molecule	CD300LE|CLM-2|CLM2|CMRF35-A5|IREM-2|IREM2|PIgR-2|PIgR2	3754	2.34219	-1.13358	1.68372	0.107791	0.722331	-4.26465
chr11	117314557	117413266	+	ENSG00000110274.16	protein_coding	CEP164	22897	centrosomal protein 164	NPHP15	12896	-0.144724	6.13148	-1.67123	0.107829	0.722331	-5.84195
chr10	62183035	62268844	-	ENSG00000182010.11	protein_coding	RTKN2	219790	rhotekin 2	PLEKHK1|bA531F24.1	9793	-0.404632	4.82832	-1.68417	0.107844	0.722331	-5.55991
chr1	100148448	100178273	-	ENSG00000122477.13	protein_coding	LRRC39	127495	leucine rich repeat containing 39	-	1992	-0.462762	2.53313	-1.6705	0.107974	0.722788	-4.97462
chr6	109492856	109691217	-	ENSG00000155085.15	protein_coding	AK9	221264	adenylate kinase 9	AK 9|AKD1|AKD2|C6orf199|C6orf224|dJ70A9.1	10098	0.278679	4.48382	1.67003	0.108068	0.723009	-5.50296
chr13	46334681	46438190	-	ENSG00000102445.19	protein_coding	RUBCNL	80183	rubicon like autophagy enhancer	C13orf18|KIAA0226L|PACER	15923	-1.11326	0.0311367	-1.66773	0.108528	0.725676	-4.45319
chr5	77072072	77087285	-	ENSG00000132846.6	protein_coding	ZBED3	84327	zinc finger BED-type containing 3	-	6476	-0.345983	3.19631	-1.66667	0.108742	0.726691	-5.1923
chr9	129834698	129881828	+	ENSG00000136878.14	protein_coding	USP20	10868	ubiquitin specific peptidase 20	LSFR3A|VDU2|hVDU2	5511	0.137219	8.07209	1.66632	0.108811	0.726743	-5.97796
chr2	86440647	86492716	+	ENSG00000115548.17	protein_coding	KDM3A	55818	lysine demethylase 3A	JHDM2A|JHMD2A|JMJD1|JMJD1A|TSGA	13299	-0.187471	8.50614	-1.66377	0.109326	0.729301	-5.99097
chr3	160755602	161078902	+	ENSG00000163590.14	protein_coding	PPM1L	151742	protein phosphatase, Mg2+/Mn2+ dependent 1L	PP2C-epsilon|PP2CE|PPM1-LIKE	12442	0.442859	3.45512	1.66498	0.109337	0.729301	-5.26394
chrX	102153708	102155977	-	ENSG00000184515.11	protein_coding	BEX5	340542	brain expressed X-linked 5	NGFRAP1L1	983	-0.52828	1.47005	-1.66317	0.109446	0.729301	-4.71412
chr6	135283532	135497765	-	ENSG00000135541.21	protein_coding	AHI1	54806	Abelson helper integration site 1	AHI-1|JBTS3|ORF1|dJ71N10.1	8694	0.499399	3.77943	1.67545	0.109527	0.729301	-5.35915
chr7	73567537	73578791	-	ENSG00000106638.17	protein_coding	TBL2	26608	transducin beta like 2	WBSCR13|WS-betaTRP	6396	0.258152	4.3024	1.66269	0.109543	0.729301	-5.48074
chr8	132685007	132760712	-	ENSG00000165071.14	protein_coding	TMEM71	137835	transmembrane protein 71	-	3332	0.140916	6.78078	1.66258	0.109565	0.729301	-5.9149
chr3	49907160	49930173	-	ENSG00000164077.14	protein_coding	MON1A	84315	MON1 homolog A, secretory trafficking associated	SAND1	6446	0.433034	3.36472	1.66317	0.109726	0.729579	-5.29148
chr11	118893875	118925608	-	ENSG00000186174.12	protein_coding	BCL9L	283149	BCL9 like	B9L|BCL9-2|DLNB11	10470	0.201252	8.99276	1.66211	0.109771	0.729579	-6.0017
chr19	17468769	17506168	+	ENSG00000130304.17	protein_coding	SLC27A1	376497	solute carrier family 27 member 1	ACSVL5|FATP|FATP-1|FATP1	8204	0.273952	4.23468	1.66146	0.109793	0.729579	-5.47913
chrX	132023302	132075943	+	ENSG00000134602.16	protein_coding	STK26	51765	serine/threonine kinase 26	MASK|MST4	3317	0.148535	6.92964	1.66013	0.110063	0.730738	-5.93067
chr9	111686173	111795008	-	ENSG00000165181.16	protein_coding	SHOC1	158401	shortage in chiasmata 1	C9orf84|MZIP2|ZIP2|ZIP2H	6276	1.43993	-0.528866	1.65948	0.110193	0.730738	-4.3559
chrX	119574536	119591083	+	ENSG00000077721.16	protein_coding	UBE2A	7319	ubiquitin conjugating enzyme E2 A	HHR6A|MRXS30|MRXSN|RAD6A|UBC2	5207	0.218078	5.23739	1.65944	0.110202	0.730738	-5.68126
chr19	41397808	41425002	+	ENSG00000248098.12	protein_coding	BCKDHA	593	branched chain keto acid dehydrogenase E1 subunit alpha	BCKDE1A|MSU|MSUD1|OVD1A	2251	0.527263	1.93967	1.65914	0.110262	0.730738	-4.86503
chr19	52949379	52962911	-	ENSG00000180257.14	protein_coding	ZNF816	125893	zinc finger protein 816	ZNF816A	3310	0.435825	3.47542	1.66007	0.110325	0.730738	-5.28086
chr16	57152466	57186116	-	ENSG00000172775.17	protein_coding	PSME3IP1	80011	proteasome activator subunit 3 interacting protein 1	C16orf94|CDA018|CDA10|FAM192A|NIP30|PIP30	4347	-0.148632	7.20344	-1.6585	0.110394	0.730738	-5.95319
chr3	128879596	128916067	+	ENSG00000177646.19	protein_coding	ACAD9	28976	acyl-CoA dehydrogenase family member 9	MC1DN20|NPD002	4327	0.167359	5.27886	1.65832	0.110429	0.730738	-5.72452
chr22	20129456	20148007	+	ENSG00000099904.16	protein_coding	ZDHHC8	29801	zinc finger DHHC-type palmitoyltransferase 8	DHHC8|ZDHHCL1|ZNF378	5545	0.173685	6.77644	1.65816	0.110463	0.730738	-5.92821
chr3	183015218	183116075	-	ENSG00000078070.13	protein_coding	MCCC1	56922	methylcrotonoyl-CoA carboxylase 1	MCC-B|MCCA	4311	-0.170107	5.34424	-1.6572	0.110657	0.731528	-5.73139
chr1	19664875	19680966	+	ENSG00000158748.4	protein_coding	HTR6	3362	5-hydroxytryptamine receptor 6	5-HT6|5-HT6R	3800	-1.47517	1.25103	-1.68736	0.110783	0.731528	-4.70224
chrX	53191321	53225422	-	ENSG00000126012.12	protein_coding	KDM5C	8242	lysine demethylase 5C	DXS1272E|JARID1C|MRX13|MRXJ|MRXSCJ|MRXSJ|SMCX|XE169	8727	-0.27904	7.8914	-1.67149	0.110783	0.731528	-5.96826
chr1	12230030	12512047	+	ENSG00000048707.15	protein_coding	VPS13D	55187	vacuolar protein sorting 13 homolog D	SCAR4	20768	0.161381	8.00998	1.65635	0.110831	0.731528	-5.9916
chr17	75441159	75500452	+	ENSG00000177728.17	protein_coding	TMEM94	9772	transmembrane protein 94	IDDCDF|KIAA0195	9045	0.155321	6.83702	1.65597	0.110909	0.731528	-5.93499
chr11	3000922	3057613	-	ENSG00000110619.18	protein_coding	CARS1	833	cysteinyl-tRNA synthetase 1	CARS|CYSRS|MCDDBH|MDBH|MGC:11246	10037	-1.08365	0.929284	-1.65585	0.111048	0.731528	-4.52182
chr10	34109560	34815325	-	ENSG00000148498.16	protein_coding	PARD3	56288	par-3 family cell polarity regulator	ASIP|Baz|PAR3|PAR3alpha|PARD-3|PARD3A|PPP1R118|SE2-5L16|SE2-5LT1|SE2-5T2	6513	-0.684104	2.0363	-1.65522	0.111063	0.731528	-4.80543
chr5	75025346	75052558	-	ENSG00000176928.7	protein_coding	GCNT4	51301	glucosaminyl (N-acetyl) transferase 4	C2GNT3|LINC01336	5884	-0.196081	5.95467	-1.65458	0.111194	0.731528	-5.82854
chr6	41921499	41933046	+	ENSG00000112578.10	protein_coding	BYSL	705	bystin like	BYSTIN|Enp1	1937	0.419987	2.58251	1.65457	0.111195	0.731528	-5.05429
chr7	50444128	50542535	-	ENSG00000132436.11	protein_coding	FIGNL1	63979	fidgetin like 1	-	5034	0.345393	4.75632	1.65936	0.111259	0.731528	-5.5983
chr6	38675925	38703145	-	ENSG00000124767.7	protein_coding	GLO1	2739	glyoxalase I	GLOD1|GLYI|HEL-S-74	2356	-0.15317	5.61423	-1.65423	0.111264	0.731528	-5.77276
chr14	34981957	35029567	+	ENSG00000100883.12	protein_coding	SRP54	6729	signal recognition particle 54	SCN8	3903	0.159681	5.60869	1.65365	0.111383	0.731604	-5.78557
chr10	103396626	103446294	+	ENSG00000148843.15	protein_coding	PDCD11	22984	programmed cell death 11	ALG-4|ALG4|NFBP|RRP5	7672	0.133067	6.678	1.6534	0.111435	0.731604	-5.92925
chr17	43766125	43778977	-	ENSG00000108861.9	protein_coding	DUSP3	1845	dual specificity phosphatase 3	VHR	4997	0.257271	3.62736	1.65327	0.111462	0.731604	-5.34453
chr1	246724409	246768137	+	ENSG00000143653.10	protein_coding	SCCPDH	51097	saccharopine dehydrogenase (putative)	CGI-49|NET11	2141	-0.369829	3.04	-1.65267	0.111585	0.731607	-5.1678
chr3	149812770	149962139	+	ENSG00000082996.20	protein_coding	RNF13	11342	ring finger protein 13	EIEE73|RZF	3573	-0.262073	5.00044	-1.65238	0.111645	0.731607	-5.67155
chr1	113073198	113132260	+	ENSG00000198799.12	protein_coding	LRIG2	9860	leucine rich repeats and immunoglobulin like domains 2	LIG-2|LIG2|UFS2	12467	-0.178112	5.86637	-1.65205	0.111712	0.731607	-5.82515
chr3	182793503	182921629	+	ENSG00000058063.16	protein_coding	ATP11B	23200	ATPase phospholipid transporting 11B (putative)	ATPIF|ATPIR	9187	0.159258	8.05815	1.65182	0.111759	0.731607	-5.99805
chr2	65227788	65271253	+	ENSG00000138071.14	protein_coding	ACTR2	10097	actin related protein 2	ARP2	4312	0.173623	8.01054	1.65166	0.111791	0.731607	-5.99793
chr16	22345936	22437165	-	ENSG00000140743.8	protein_coding	CDR2	1039	cerebellar degeneration related protein 2	CDR62|Yo	3950	-0.187452	7.41023	-1.65145	0.111834	0.731607	-5.97331
chr1	228487382	228496188	+	ENSG00000168159.13	protein_coding	RNF187	149603	ring finger protein 187	RACO-1|RACO1	3386	-0.196722	6.02701	-1.65087	0.111955	0.731718	-5.86423
chrX	148500617	149000663	+	ENSG00000155966.14	protein_coding	AFF2	2334	AF4/FMR2 family member 2	FMR2|FMR2P|FRAXE|MRX2|OX19	14241	0.413597	3.18228	1.65051	0.112029	0.731718	-5.20752
chr2	156324437	156342348	-	ENSG00000153234.15	protein_coding	NR4A2	4929	nuclear receptor subfamily 4 group A member 2	HZF-3|NOT|NURR1|RNR1|TINUR	3963	-1.14071	4.32744	-1.69159	0.112258	0.731718	-5.38638
chr12	53191323	53207282	-	ENSG00000139626.16	protein_coding	ITGB7	3695	integrin subunit beta 7	-	4451	0.199704	7.19967	1.64931	0.112276	0.731718	-5.97065
chr2	70607618	70768225	-	ENSG00000075340.23	protein_coding	ADD2	119	adducin 2	ADDB	12673	-0.304388	4.37747	-1.64926	0.112287	0.731718	-5.52315
chr15	43330672	43354569	+	ENSG00000168803.16	protein_coding	ADAL	161823	adenosine deaminase like	HsMAPDA	5734	-0.309616	3.58748	-1.6492	0.112299	0.731718	-5.32629
chr22	46150521	46243756	+	ENSG00000186951.16	protein_coding	PPARA	5465	peroxisome proliferator activated receptor alpha	NR1C1|PPAR|PPARalpha|hPPAR	13219	0.242646	4.4712	1.64911	0.112318	0.731718	-5.56409
chr8	614746	738106	-	ENSG00000104714.14	protein_coding	ERICH1	157697	glutamate rich 1	HSPC319	9711	0.209063	5.79014	1.64875	0.112391	0.731718	-5.82648
chr13	46553168	46753040	+	ENSG00000136141.15	protein_coding	LRCH1	23143	leucine rich repeats and calponin homology domain containing 1	CHDC1|NP81	8610	-0.211606	5.56491	-1.64866	0.11241	0.731718	-5.76901
chrX	108091668	108154671	+	ENSG00000101844.18	protein_coding	ATG4A	115201	autophagy related 4A cysteine peptidase	APG4A|AUTL2	2927	0.287478	3.93154	1.64789	0.112568	0.732347	-5.43256
chr19	11814273	11835216	+	ENSG00000171295.13	protein_coding	ZNF440	126070	zinc finger protein 440	-	6453	-0.223129	4.62713	-1.64667	0.112822	0.733097	-5.59038
chr2	170990823	171231314	-	ENSG00000198586.14	protein_coding	TLK1	9874	tousled like kinase 1	PKU-beta	9405	-0.203463	7.01169	-1.64612	0.112936	0.733097	-5.95454
chr3	48241100	48299253	+	ENSG00000164048.14	protein_coding	ZNF589	51385	zinc finger protein 589	SZF1	5521	-0.180948	6.38527	-1.64605	0.11295	0.733097	-5.90395
chr18	12785478	12929643	-	ENSG00000175354.20	protein_coding	PTPN2	5771	protein tyrosine phosphatase non-receptor type 2	PTN2|PTPT|TC-PTP|TCELLPTP|TCPTP	8718	-0.148775	6.34678	-1.64587	0.112988	0.733097	-5.90329
chr10	71396920	71815947	+	ENSG00000107736.21	protein_coding	CDH23	64072	cadherin related 23	CDHR23|PITA5|USH1D	18601	-0.298889	6.29654	-1.65903	0.112995	0.733097	-5.88829
chr3	197889077	197960142	-	ENSG00000114473.14	protein_coding	IQCG	84223	IQ motif containing G	CFAP122|DRC9	7468	0.305801	3.35665	1.64532	0.113102	0.733305	-5.27263
chr19	56219670	56368383	-	ENSG00000131848.9	protein_coding	ZSCAN5A	79149	zinc finger and SCAN domain containing 5A	ZNF495|ZSCAN5	8039	0.490143	2.11764	1.64508	0.113151	0.733305	-4.90444
chr2	85584431	85593406	+	ENSG00000168899.5	protein_coding	VAMP5	10791	vesicle associated membrane protein 5	-	790	0.268124	4.04393	1.64321	0.11354	0.735235	-5.43854
chr7	64990356	65006743	-	ENSG00000213462.5	protein_coding	ERV3-1	2086	endogenous retrovirus group 3 member 1, envelope	ERV-R|ERV3|ERVR|HERV-R|HERVR|envR	5027	0.340501	4.3395	1.64424	0.113573	0.735235	-5.52875
chr6	4994717	5004063	-	ENSG00000124787.14	protein_coding	RPP40	10799	ribonuclease P/MRP subunit p40	RNASEP1|bA428J1.3	1977	0.536225	2.3225	1.6424	0.113709	0.735619	-4.98818
chr9	34634722	34637809	-	ENSG00000147955.17	protein_coding	SIGMAR1	10280	sigma non-opioid intracellular receptor 1	ALS16|DSMA2|OPRS1|SIG-1R|SR-BP|SR-BP1|SRBP|hSigmaR1|sigma1R	2196	0.186094	5.44232	1.64192	0.11381	0.735619	-5.78307
chr11	71453109	71524107	+	ENSG00000172890.13	protein_coding	NADSYN1	55191	NAD synthetase 1	VCRL3	16263	0.170711	7.89859	1.64185	0.113824	0.735619	-6.00954
chr13	49995888	50020481	+	ENSG00000204977.10	protein_coding	TRIM13	10206	tripartite motif containing 13	CAR|DLEU5|LEU5|RFP2|RNF77	8096	-0.247315	5.07604	-1.64155	0.113887	0.735619	-5.66592
chr12	49568218	49644666	+	ENSG00000110844.13	protein_coding	PRPF40B	25766	pre-mRNA processing factor 40 homolog B	HYPC	9444	-0.249858	3.6656	-1.64118	0.113964	0.735619	-5.40285
chr16	30407414	30431108	+	ENSG00000179965.12	protein_coding	ZNF771	51333	zinc finger protein 771	DSC43	5527	-0.494865	1.67734	-1.64062	0.11408	0.735619	-4.83259
chr8	86514435	86561498	+	ENSG00000085719.13	protein_coding	CPNE3	8895	copine 3	CPN3|PRO1071	6737	0.175847	6.15478	1.63997	0.114217	0.735619	-5.8887
chr3	45886504	45903175	+	ENSG00000173585.16	protein_coding	CCR9	10803	C-C motif chemokine receptor 9	CC-CKR-9|CDw199|GPR-9-6|GPR28	2807	0.757107	1.31961	1.63971	0.114271	0.735619	-4.74359
chr1	32214472	32222359	-	ENSG00000160055.20	protein_coding	TMEM234	56063	transmembrane protein 234	AASL548|C1orf91|PRO1105|RP4-622L5|dJ622L5.7	3571	0.281177	3.43357	1.63927	0.114364	0.735619	-5.31057
chr11	82729940	82733864	-	ENSG00000182103.5	protein_coding	FAM181B	220382	family with sequence similarity 181 member B	-	3925	-1.68756	-1.70358	-1.63907	0.114405	0.735619	-4.29651
chrX	135032355	135033546	+	ENSG00000134590.14	protein_coding	RTL8C	8933	retrotransposon Gag like 8C	CXX1|FAM127A|MAR8C|MART8C|Mar8|Mart8|SIRH5	1192	0.347885	3.48704	1.63899	0.114423	0.735619	-5.32559
chr10	18140424	18543557	+	ENSG00000165995.21	protein_coding	CACNB2	783	calcium voltage-gated channel auxiliary subunit beta 2	CAB2|CACNLB2|CAVB2|MYSB	11186	-0.346433	3.57721	-1.63897	0.114427	0.735619	-5.31931
chr2	45388680	45612165	-	ENSG00000068784.13	protein_coding	SRBD1	55133	S1 RNA binding domain 1	-	5045	-0.238765	4.61005	-1.63749	0.114738	0.735619	-5.58716
chr17	55392622	55421924	-	ENSG00000108960.9	protein_coding	MMD	23531	monocyte to macrophage differentiation associated	MMA|MMD1|PAQR11	3193	-0.377546	4.19851	-1.63943	0.114763	0.735619	-5.46169
chr15	51751597	51816363	+	ENSG00000128872.10	protein_coding	TMOD2	29767	tropomodulin 2	N-TMOD|NTMOD	11595	-0.199538	6.41166	-1.63727	0.114784	0.735619	-5.92178
chr5	659862	693352	-	ENSG00000171368.12	protein_coding	TPPP	11076	tubulin polymerization promoting protein	TPPP/p25|TPPP1|p24|p25|p25alpha	5979	0.775501	0.773658	1.63674	0.114894	0.735619	-4.61147
chr21	45981769	46005050	+	ENSG00000142156.15	protein_coding	COL6A1	1291	collagen type VI alpha 1 chain	BTHLM1|OPLL|UCHMD1	5311	0.629988	4.06882	1.667	0.1149	0.735619	-5.4832
chr9	122237622	122264840	-	ENSG00000119446.14	protein_coding	RBM18	92400	RNA binding motif protein 18	-	5196	0.235041	4.94554	1.63658	0.114928	0.735619	-5.68522
chr18	721588	812546	-	ENSG00000176105.14	protein_coding	YES1	7525	YES proto-oncogene 1, Src family tyrosine kinase	HsT441|P61-YES|Yes|c-yes	5100	0.453314	3.60669	1.63869	0.114949	0.735619	-5.29348
chr10	133394094	133422520	+	ENSG00000148824.19	protein_coding	MTG1	92170	mitochondrial ribosome associated GTPase 1	GTP|GTPBP7	5308	0.272327	4.56122	1.63619	0.115012	0.735619	-5.60055
chr16	67438014	67481181	-	ENSG00000159720.12	protein_coding	ATP6V0D1	9114	ATPase H+ transporting V0 subunit d1	ATP6D|ATP6DV|P39|VATX|VMA6|VPATPD	8156	0.240289	4.93283	1.63575	0.115104	0.735619	-5.70859
chr9	26840685	26892803	-	ENSG00000120159.13	protein_coding	CAAP1	79886	caspase activity and apoptosis inhibitor 1	C9orf82|CAAP	3160	-0.245548	4.37651	-1.63527	0.115204	0.735619	-5.53577
chr13	108207439	108218368	-	ENSG00000174405.13	protein_coding	LIG4	3981	DNA ligase 4	LIG4S	4387	0.302937	4.38875	1.63522	0.115216	0.735619	-5.53949
chr4	109433772	109540896	+	ENSG00000138802.11	protein_coding	SEC24B	10427	SEC24 homolog B, COPII coat complex component	SEC24	5219	-0.207969	6.58459	-1.63491	0.11528	0.735619	-5.93739
chr1	151982915	151993859	-	ENSG00000197747.9	protein_coding	S100A10	6281	S100 calcium binding protein A10	42C|ANX2L|ANX2LG|CAL1L|CLP11|Ca[1]|GP11|P11|p10	1012	-0.192803	5.76644	-1.63488	0.115287	0.735619	-5.85602
chr1	52020131	52055191	-	ENSG00000117862.13	protein_coding	TXNDC12	51060	thioredoxin domain containing 12	AG1|AGR1|ERP16|ERP18|ERP19|PDIA16|TLP19|hAG-1|hTLP19	2864	-0.284651	3.58404	-1.63476	0.115312	0.735619	-5.36765
chr19	19865882	19894674	+	ENSG00000256771.4	protein_coding	ZNF253	56242	zinc finger protein 253	BMZF-1|BMZF1|ZNF411	3630	-0.209534	4.97115	-1.63416	0.115438	0.735619	-5.65953
chr6	107065182	107115515	-	ENSG00000178409.14	protein_coding	BEND3	57673	BEN domain containing 3	KIAA1553	7085	-0.495972	1.19377	-1.63395	0.115483	0.735619	-4.76493
chr8	56160909	56211324	-	ENSG00000181690.8	protein_coding	PLAG1	5324	PLAG1 zinc finger	PSA|SGPA|SRS4|ZNF912	7828	-0.293618	5.16923	-1.63621	0.11556	0.735619	-5.72155
chr11	62665309	62668496	+	ENSG00000214756.8	protein_coding	CSKMT	751071	citrate synthase lysine methyltransferase	CS-KMT|METTL12|U99HG	3185	0.435832	2.84273	1.63343	0.115592	0.735619	-5.1282
chrX	136648158	136660390	+	ENSG00000102245.8	protein_coding	CD40LG	959	CD40 ligand	CD154|CD40L|HIGM1|IGM|IMD3|T-BAM|TNFSF5|TRAP|gp39|hCD40L	1852	0.317709	6.82429	1.65271	0.11565	0.735619	-5.95074
chr5	116085016	116412762	+	ENSG00000145781.9	protein_coding	COMMD10	51397	COMM domain containing 10	PTD002	2439	0.241642	4.07886	1.63297	0.115691	0.735619	-5.43636
chr8	101686542	102124907	-	ENSG00000104490.18	protein_coding	NCALD	83988	neurocalcin delta	-	8043	0.524248	2.67271	1.63513	0.115691	0.735619	-5.16122
chr2	219597857	219616451	+	ENSG00000144589.22	protein_coding	STK11IP	114790	serine/threonine kinase 11 interacting protein	LIP1|LKB1IP|STK11IP1	5697	0.17928	5.3861	1.63191	0.115914	0.736145	-5.79506
chr19	49114324	49118460	+	ENSG00000104863.12	protein_coding	LIN7B	64130	lin-7 homolog B, crumbs cell polarity complex component	LIN-7B|MALS-2|MALS2|VELI2	1753	0.443995	2.5478	1.63098	0.116112	0.736145	-5.07561
chr19	38647649	38731589	+	ENSG00000130402.12	protein_coding	ACTN4	81	actinin alpha 4	ACTININ-4|FSGS|FSGS1	6104	0.242007	5.42403	1.63074	0.116163	0.736145	-5.81401
chr8	117520713	117540262	+	ENSG00000164758.7	protein_coding	MED30	90390	mediator complex subunit 30	MED30S|THRAP6|TRAP25	1440	-0.296343	4.41165	-1.63058	0.116198	0.736145	-5.53654
chr3	49007062	49015953	+	ENSG00000178252.18	protein_coding	WDR6	11180	WD repeat domain 6	-	5304	0.142354	8.23946	1.63053	0.116207	0.736145	-6.03794
chr11	125893485	125903221	-	ENSG00000110060.9	protein_coding	PUS3	83480	pseudouridine synthase 3	2610020J05Rik|FKSG32|MRT55	2010	0.381707	3.40555	1.63008	0.116302	0.736145	-5.31123
chr6	159034468	159045152	-	ENSG00000164691.18	protein_coding	TAGAP	117289	T cell activation RhoGTPase activating protein	ARHGAP47|FKSG15|IDDM21|TAGAP1	4089	0.38735	8.02452	1.66133	0.11637	0.736145	-5.99602
chr16	31074422	31084196	+	ENSG00000167395.10	protein_coding	ZNF646	9726	zinc finger protein 646	-	8635	0.226216	5.71437	1.62956	0.116414	0.736145	-5.85587
chr19	49659569	49665875	-	ENSG00000126456.16	protein_coding	IRF3	3661	interferon regulatory factor 3	IIAE7	3794	0.143536	7.79857	1.62941	0.116445	0.736145	-6.02469
chr3	128064778	128153914	-	ENSG00000175792.12	protein_coding	RUVBL1	8607	RuvB like AAA ATPase 1	ECP-54|ECP54|INO80H|NMP 238|NMP238|PONTIN|Pontin52|RVB1|TIH1|TIP49|TIP49A	6998	0.204498	5.37768	1.62937	0.116454	0.736145	-5.78491
chr3	184242301	184249548	-	ENSG00000214160.10	protein_coding	ALG3	10195	ALG3 alpha-1,3- mannosyltransferase	CDG1D|CDGS4|CDGS6|D16Ertd36e|NOT56L|Not56|not	3455	-0.240684	4.9878	-1.62934	0.11646	0.736145	-5.71248
chr1	45002540	45011324	-	ENSG00000126107.15	protein_coding	HECTD3	79654	HECT domain E3 ubiquitin protein ligase 3	-	5072	-0.159161	5.90875	-1.62902	0.11653	0.73619	-5.88819
chr16	30602558	30624012	-	ENSG00000156853.13	protein_coding	ZNF689	115509	zinc finger protein 689	TIPUH1	4162	-0.299048	4.45787	-1.62861	0.116616	0.736341	-5.55718
chr1	215567304	215621807	+	ENSG00000136636.13	protein_coding	KCTD3	51133	potassium channel tetramerization domain containing 3	NY-REN-45	5017	0.345357	3.89957	1.62799	0.116748	0.736575	-5.43959
chrX	47445879	47482946	-	ENSG00000147124.12	protein_coding	ZNF41	7592	zinc finger protein 41	MRX89	4784	-0.221767	4.79196	-1.62749	0.116856	0.736575	-5.6571
chr7	140293693	140404433	-	ENSG00000157800.18	protein_coding	SLC37A3	84255	solute carrier family 37 member 3	-	10588	-0.215165	6.06371	-1.62682	0.116998	0.736575	-5.89325
chr10	23439458	23442390	+	ENSG00000165312.6	protein_coding	OTUD1	220213	OTU deubiquitinase 1	DUBA7|OTDC1	2933	-0.478185	5.63364	-1.65511	0.117009	0.736575	-5.72497
chr6	57314805	57646850	+	ENSG00000146143.19	protein_coding	PRIM2	5558	DNA primase subunit 2	PRIM2A|p58	5652	0.378237	2.73656	1.62666	0.117031	0.736575	-5.10176
chrX	23833353	23907938	-	ENSG00000184831.14	protein_coding	APOO	79135	apolipoprotein O	FAM121B|MIC26|MICOS26|Mic23|My025	2357	0.494744	1.88765	1.62635	0.117098	0.736575	-4.84082
chrX	71144831	71171201	+	ENSG00000196338.13	protein_coding	NLGN3	54413	neuroligin 3	HNL3	4006	0.285471	3.20921	1.62614	0.117143	0.736575	-5.24137
chr7	66205317	66420543	+	ENSG00000169902.15	protein_coding	TPST1	8460	tyrosylprotein sulfotransferase 1	TANGO13A	2805	-0.799204	1.49119	-1.62488	0.117414	0.736575	-4.73075
chr14	75064109	75119502	+	ENSG00000119703.15	protein_coding	ZC2HC1C	79696	zinc finger C2HC-type containing 1C	C14orf140|FAM164C	8738	-0.782286	1.12634	-1.62444	0.117507	0.736575	-4.73764
chrX	57591652	57597545	+	ENSG00000198455.4	protein_coding	ZXDB	158586	zinc finger X-linked duplicated B	ZNF905|dJ83L6.1	5894	-0.440678	5.54988	-1.64857	0.117666	0.736575	-5.73807
chr2	54723499	54972025	+	ENSG00000214595.12	protein_coding	EML6	400954	EMAP like 6	-	16317	-0.684024	0.36642	-1.62364	0.117679	0.736575	-4.54909
chr20	46366050	46432985	-	ENSG00000062598.18	protein_coding	ELMO2	63916	engulfment and cell motility 2	CED-12|CED12|Ced-12A|ELMO-2|VMPI	6597	0.169067	6.24183	1.62345	0.11772	0.736575	-5.93362
chr19	41907705	41928516	-	ENSG00000268041.2	protein_coding	ERFL	390937	ETS repressor factor like	erfl1	2078	-0.203945	4.96194	-1.62338	0.117735	0.736575	-5.7083
chr12	132768914	132829078	-	ENSG00000090615.15	protein_coding	GOLGA3	2802	golgin A3	GCP170|MEA-2	10615	-0.14589	7.51566	-1.62295	0.117827	0.736575	-6.02301
chr12	4615508	4649051	-	ENSG00000111254.8	protein_coding	AKAP3	10566	A-kinase anchoring protein 3	AKAP 110|AKAP110|CT82|FSP95|HEL159|PRKA3|SOB1	3672	-0.808747	0.50652	-1.62263	0.117896	0.736575	-4.57586
chr4	143513702	143557486	+	ENSG00000153147.6	protein_coding	SMARCA5	8467	SWI/SNF related, matrix associated, actin dependent regulator of chromatin, subfamily a, member 5	ISWI|SNF2H|WCRF135|hISWI|hSNF2H	8146	0.165133	7.18938	1.62263	0.117897	0.736575	-6.00236
chr17	63832081	63843065	-	ENSG00000108604.16	protein_coding	SMARCD2	6603	SWI/SNF related, matrix associated, actin dependent regulator of chromatin, subfamily d, member 2	BAF60B|CRACD2|PRO2451|Rsc6p|SGD2	3662	0.178701	6.18091	1.6226	0.117902	0.736575	-5.92397
chr16	19716456	19858467	+	ENSG00000174628.16	protein_coding	IQCK	124152	IQ motif containing K	-	4993	0.921185	0.551717	1.62254	0.117915	0.736575	-4.55545
chr1	234604269	234609525	-	ENSG00000168264.10	protein_coding	IRF2BP2	359948	interferon regulatory factor 2 binding protein 2	CVID14	4724	-0.213665	7.97607	-1.62388	0.118106	0.736575	-6.03549
chr2	74455087	74457944	+	ENSG00000115274.15	protein_coding	INO80B	83444	INO80 complex subunit B	HMGA1L4|HMGIYL4|IES2|PAP-1BP|PAPA-1|PAPA1|ZNHIT4|hIes2	1442	0.713485	1.42051	1.62151	0.118137	0.736575	-4.74088
chr1	205767986	205775482	-	ENSG00000117280.13	protein_coding	RAB29	8934	RAB29, member RAS oncogene family	RAB7L|RAB7L1	3904	0.218217	6.2732	1.62106	0.118233	0.736575	-5.93392
chr5	81301587	81313297	+	ENSG00000131732.12	protein_coding	ZCCHC9	84240	zinc finger CCHC-type containing 9	PPP1R41	5130	-0.189099	4.85906	-1.62092	0.118263	0.736575	-5.69214
chr19	18097793	18151692	+	ENSG00000099308.10	protein_coding	MAST3	23031	microtubule associated serine/threonine kinase 3	-	6772	0.176613	6.85219	1.6208	0.11829	0.736575	-5.99264
chr12	102120185	102197520	+	ENSG00000185480.11	protein_coding	PARPBP	55010	PARP1 binding protein	AROM|C12orf48|PARI	4745	0.880794	0.387625	1.62072	0.118307	0.736575	-4.51085
chrX	49250438	49270477	-	ENSG00000049768.16	protein_coding	FOXP3	50943	forkhead box P3	AIID|DIETER|IPEX|JM2|PIDX|XPID	3086	-0.508851	3.20679	-1.62547	0.118314	0.736575	-5.25806
chr17	75261674	75266376	+	ENSG00000125445.11	protein_coding	MRPS7	51081	mitochondrial ribosomal protein S7	COXPD34|MRP-S|MRP-S7|RP-S7|RPMS7|S7mt|bMRP27a	3327	0.19201	5.08676	1.62053	0.118347	0.736575	-5.7283
chr1	161215234	161220699	+	ENSG00000158869.11	protein_coding	FCER1G	2207	Fc fragment of IgE receptor Ig	FCRG	964	-0.922218	0.656511	-1.62031	0.118395	0.736575	-4.57693
chr4	1009936	1026898	+	ENSG00000127418.15	protein_coding	FGFRL1	53834	fibroblast growth factor receptor like 1	FGFR-5|FGFR5|FHFR	4342	0.259558	4.5214	1.62017	0.118426	0.736575	-5.62422
chr10	87225448	87236908	+	ENSG00000184923.12	protein_coding	NUTM2A	728118	NUT family member 2A	FAM22A	5082	0.87565	0.19265	1.61996	0.118471	0.736575	-4.48186
chr7	64666083	64711582	+	ENSG00000196247.11	protein_coding	ZNF107	51427	zinc finger protein 107	Y8|ZFD25|ZNF588|smap-7	7162	-0.240661	6.44222	-1.62202	0.118579	0.736575	-5.92762
chr8	97644184	97730260	+	ENSG00000147649.10	protein_coding	MTDH	92140	metadherin	3D3|AEG-1|AEG1|LYRIC|LYRIC/3D3	7876	0.172164	7.41178	1.61941	0.118589	0.736575	-6.019
chr14	59460363	59484408	-	ENSG00000126790.12	protein_coding	L3HYPDH	112849	trans-L-3-hydroxyproline dehydratase	C14orf149	3493	-0.232737	5.17357	-1.61859	0.118767	0.736951	-5.77659
chr19	57921882	57935402	-	ENSG00000196724.13	protein_coding	ZNF418	147686	zinc finger protein 418	-	4512	0.518127	3.08734	1.62175	0.118774	0.736951	-5.21336
chr5	710355	784729	-	ENSG00000206077.12	protein_coding	ZDHHC11B	653082	zinc finger DHHC-type containing 11B	DHHC-11B	5628	-0.568134	1.75069	-1.61774	0.118951	0.73758	-4.86267
chr2	226835581	226999215	+	ENSG00000144468.17	protein_coding	RHBDD1	84236	rhomboid domain containing 1	RHBDL4|RRP4	6926	-0.224887	4.86052	-1.61732	0.119042	0.73758	-5.69092
chr6	116118909	116158747	-	ENSG00000123500.10	protein_coding	COL10A1	1300	collagen type X alpha 1 chain	-	3830	-0.734279	0.198325	-1.61699	0.119113	0.73758	-4.5187
chrX	103822327	103832257	-	ENSG00000123570.4	protein_coding	RAB9B	51209	RAB9B, member RAS oncogene family	RAB9L|Rab-9L	3772	0.661088	0.898583	1.61644	0.119232	0.73758	-4.67155
chr15	89830599	89894638	-	ENSG00000157823.17	protein_coding	AP3S2	10239	adaptor related protein complex 3 subunit sigma 2	AP3S3|sigma3b	9237	-0.242575	3.94349	-1.61573	0.119386	0.73758	-5.47822
chr2	68041130	68110948	-	ENSG00000197223.11	protein_coding	C1D	10438	C1D nuclear receptor corepressor	LRP1|Rrp47|SUN-CoR|SUNCOR|hC1D	3581	-0.36459	3.40267	-1.61564	0.119407	0.73758	-5.31532
chr1	220690363	220699153	+	ENSG00000162817.7	protein_coding	C1orf115	79762	chromosome 1 open reading frame 115	RDD1	2891	-1.30533	-0.918641	-1.61562	0.119411	0.73758	-4.41514
chr8	93698561	93731527	+	ENSG00000188343.13	protein_coding	CIBAR1	137392	CBY1 interacting BAR domain containing 1	FAM92A|FAM92A1|PAPA9	7423	0.411901	3.18726	1.61554	0.119428	0.73758	-5.22605
chr1	232804892	232808407	+	ENSG00000212916.4	protein_coding	MAP10	54627	microtubule associated protein 10	KIAA1383|MTR120	3516	-0.416563	2.43824	-1.61548	0.11944	0.73758	-5.08304
chr16	30423615	30430030	-	ENSG00000179958.9	protein_coding	DCTPP1	79077	dCTP pyrophosphatase 1	CDA03|RS21C6|XTP3TPA	1540	0.410277	3.14571	1.61466	0.119618	0.73758	-5.25514
chr12	27081058	27082514	-	ENSG00000214700.5	protein_coding	C12orf71	728858	chromosome 12 open reading frame 71	-	957	0.988959	-0.210118	1.6146	0.119632	0.73758	-4.44641
chr1	160343316	160358952	+	ENSG00000162736.17	protein_coding	NCSTN	23385	nicastrin	ATAG1874	4131	0.135692	6.5402	1.61459	0.119635	0.73758	-5.97734
chr6	41042467	41044337	+	ENSG00000112212.12	protein_coding	TSPO2	222642	translocator protein 2	BZRPL1	1075	0.749087	1.05746	1.61415	0.119731	0.73758	-4.64858
chr7	5431335	5513809	-	ENSG00000155034.19	protein_coding	FBXL18	80028	F-box and leucine rich repeat protein 18	Fbl18	9753	0.381416	2.87246	1.61405	0.119751	0.73758	-5.18536
chr1	40344850	40423326	+	ENSG00000084070.12	protein_coding	SMAP2	64744	small ArfGAP2	SMAP1L	3601	-0.218755	8.68361	-1.61777	0.119844	0.737594	-6.06626
chr13	114281601	114305817	+	ENSG00000169062.15	protein_coding	UPF3A	65110	UPF3A regulator of nonsense mediated mRNA decay	HUPF3A|RENT3A|UPF3	5755	0.219397	6.53119	1.61412	0.119914	0.737594	-5.97113
chr2	200305881	200482264	+	ENSG00000196141.14	protein_coding	SPATS2L	26010	spermatogenesis associated serine rich 2 like	DNAPTP6|SGNP	10453	-1.3295	1.89157	-1.64105	0.119975	0.737594	-4.81217
chr5	112876385	112922289	-	ENSG00000129625.13	protein_coding	REEP5	7905	receptor accessory protein 5	C5orf18|D5S346|DP1|POB16|TB2|YOP1|Yip2e	3974	0.182701	5.09511	1.61269	0.120049	0.737594	-5.72937
chrX	40626921	40647561	-	ENSG00000185753.13	protein_coding	CXorf38	159013	chromosome X open reading frame 38	-	6050	-0.232254	6.16888	-1.61344	0.120066	0.737594	-5.91892
chr16	57092583	57148369	+	ENSG00000140848.17	protein_coding	CPNE2	221184	copine 2	COPN2|CPN2	7737	-0.334509	3.80151	-1.61222	0.12015	0.737728	-5.45955
chr6	89642498	89819794	-	ENSG00000112159.12	protein_coding	MDN1	23195	midasin AAA ATPase 1	Rea1	18674	0.147667	8.48297	1.61131	0.120351	0.737853	-6.07126
chr17	18183078	18209954	+	ENSG00000091542.9	protein_coding	ALKBH5	54890	alkB homolog 5, RNA demethylase	ABH5|OFOXD|OFOXD1	3601	0.203262	6.33347	1.6109	0.120438	0.737853	-5.96184
chr19	18637025	18671721	+	ENSG00000167487.12	protein_coding	KLHL26	55295	kelch like family member 26	-	4744	-0.323565	3.39991	-1.61088	0.120445	0.737853	-5.35008
chr20	45881227	45885266	+	ENSG00000168612.4	protein_coding	ZSWIM1	90204	zinc finger SWIM-type containing 1	C20orf162	2769	-0.284793	3.43738	-1.61079	0.120464	0.737853	-5.35348
chr12	50763710	50821162	+	ENSG00000123268.9	protein_coding	ATF1	466	activating transcription factor 1	EWS-ATF1|FUS/ATF-1|TREB36	2830	-0.20454	5.23188	-1.6107	0.120484	0.737853	-5.7721
chr14	75079353	75127344	-	ENSG00000119638.13	protein_coding	NEK9	91754	NIMA related kinase 9	APUG|LCCS10|NC|NERCC|NERCC1	10760	0.133204	7.72103	1.60937	0.120774	0.738448	-6.05183
chr17	35243071	35273655	+	ENSG00000166750.10	protein_coding	SLFN5	162394	schlafen family member 5	-	10674	0.236158	9.68267	1.61773	0.120814	0.738448	-6.07676
chr6	14117256	14136918	+	ENSG00000112149.10	protein_coding	CD83	9308	CD83 molecule	BL11|HB15	2384	-1.00782	2.46812	-1.63319	0.120817	0.738448	-4.97755
chrX	153418322	153426481	+	ENSG00000189420.8	protein_coding	ZFP92	139735	ZFP92 zinc finger protein	ZNF897	6105	-0.658849	1.08473	-1.60911	0.120831	0.738448	-4.71252
chr1	235109341	235128837	-	ENSG00000173726.11	protein_coding	TOMM20	9804	translocase of outer mitochondrial membrane 20	MAS20|MOM19|TOM20	3438	-0.232234	6.95123	-1.61201	0.120937	0.738593	-5.9965
chr2	227472152	227561214	+	ENSG00000173744.17	protein_coding	AGFG1	3267	ArfGAP with FG repeats 1	HRB|RAB|RIP	9321	-0.252063	6.88844	-1.61562	0.120987	0.738593	-5.99171
chr15	52307283	52529050	-	ENSG00000197535.14	protein_coding	MYO5A	4644	myosin VA	GS1|MYH12|MYO5|MYR12	12988	0.206234	6.32544	1.60815	0.121043	0.738593	-5.96476
chr19	43872365	43901385	-	ENSG00000176222.9	protein_coding	ZNF404	342908	zinc finger protein 404	-	2477	-0.440116	2.80737	-1.60778	0.121123	0.738677	-5.12244
chr19	37007857	37130368	+	ENSG00000197050.11	protein_coding	ZNF420	147923	zinc finger protein 420	APAK	4077	-0.263107	4.61692	-1.60752	0.121182	0.738677	-5.66776
chr10	3775996	3785281	-	ENSG00000067082.15	protein_coding	KLF6	1316	Kruppel like factor 6	BCD1|CBA1|COPEB|CPBP|GBF|PAC1|ST12|ZF9	6139	0.324466	7.65995	1.62967	0.121286	0.738932	-6.02573
chr1	23870515	23913362	-	ENSG00000188822.8	protein_coding	CNR2	1269	cannabinoid receptor 2	CB-2|CB2|CX5	5265	-1.2022	-0.310718	-1.60611	0.12149	0.739171	-4.49842
chr9	137255327	137273542	+	ENSG00000188986.8	protein_coding	NELFB	25920	negative elongation factor complex member B	COBRA1|NELF-B	2540	0.171761	6.09546	1.60598	0.12152	0.739171	-5.94051
chr16	23835983	24220611	+	ENSG00000166501.14	protein_coding	PRKCB	5579	protein kinase C beta	PKC-beta|PKCB|PKCI(2)|PKCbeta|PRKCB1|PRKCB2	11049	0.157507	7.47299	1.60557	0.121611	0.739171	-6.0511
chr2	105744912	105894274	+	ENSG00000071051.14	protein_coding	NCK2	8440	NCK adaptor protein 2	GRB4|NCKbeta	2975	-0.173901	7.70587	-1.60485	0.12177	0.739171	-6.05527
chr12	9827481	9845007	+	ENSG00000150045.12	protein_coding	KLRF1	51348	killer cell lectin like receptor F1	CLEC5C|NKp80	1260	0.837235	1.05385	1.60461	0.121822	0.739171	-4.67121
chrX	123859724	123913976	+	ENSG00000101966.13	protein_coding	XIAP	331	X-linked inhibitor of apoptosis	API3|BIRC4|IAP-3|ILP1|MIHA|XLP2|hIAP-3|hIAP3	8996	0.159713	6.278	1.60461	0.121823	0.739171	-5.94619
chr15	79432336	79472304	+	ENSG00000169330.9	protein_coding	MINAR1	23251	membrane integral NOTCH2 associated receptor 1	KIAA1024|UBTOR	6994	-0.679429	0.933662	-1.60425	0.121901	0.739171	-4.69156
chr10	4987400	5018031	-	ENSG00000151632.17	protein_coding	AKR1C2	1646	aldo-keto reductase family 1 member C2	AKR1C-pseudo|BABP|DD|DD-2|DD/BABP|DD2|DDH2|HAKRD|HBAB|MCDR2|SRXY8|TDD	6461	-0.627573	1.42955	-1.60389	0.121981	0.739171	-4.78853
chr11	64318121	64321811	+	ENSG00000126432.14	protein_coding	PRDX5	25824	peroxiredoxin 5	ACR1|AOEB166|B166|HEL-S-55|PLP|PMP20|PRDX6|PRXV|SBBI10|prx-V	860	0.239137	5.4943	1.60379	0.122005	0.739171	-5.84494
chr5	134874371	134901635	+	ENSG00000113621.15	protein_coding	TXNDC15	79770	thioredoxin domain containing 15	BUG|C5orf14|UNQ335	4807	0.288841	4.49942	1.60343	0.122084	0.739171	-5.62774
chr1	160091340	160098943	-	ENSG00000162729.14	protein_coding	IGSF8	93185	immunoglobulin superfamily member 8	CD316|CD81P3|EWI-2|EWI2|KCT-4|LIR-D1|PGRL	2592	0.216363	6.45626	1.60368	0.122145	0.739171	-5.98506
chr11	111782195	111871581	-	ENSG00000086848.15	protein_coding	ALG9	79796	ALG9 alpha-1,2-mannosyltransferase	CDG1L|DIBD1|GIKANIS|LOH11CR1J	8070	-0.309706	3.85109	-1.60284	0.122213	0.739171	-5.43307
chr8	22165140	22212326	+	ENSG00000168487.19	protein_coding	BMP1	649	bone morphogenetic protein 1	OI13|PCOLC|PCP|PCP2|TLD	7067	0.530819	2.58438	1.60267	0.122252	0.739171	-5.11931
chrX	46837043	46882358	+	ENSG00000102218.6	protein_coding	RP2	6102	RP2 activator of ARL3 GTPase	DELXp11.3|NM23-H10|NME10|TBCCD2|XRP2	3700	0.339634	3.31046	1.60245	0.122299	0.739171	-5.31686
chr9	33817160	33920399	+	ENSG00000107341.5	protein_coding	UBE2R2	54926	ubiquitin conjugating enzyme E2 R2	CDC34B|E2-CDC34B|UBC3B	4477	0.169447	6.14432	1.60113	0.122592	0.739171	-5.95011
chr22	40370591	40410289	+	ENSG00000100359.21	protein_coding	SGSM3	27352	small G protein signaling modulator 3	CIP85|MAP|RABGAP5|RUSC3|RUTBC3|RabGAP-5|rabGAPLP	4770	0.191737	4.36604	1.60087	0.122651	0.739171	-5.58939
chr12	39755025	40106089	-	ENSG00000151229.13	protein_coding	SLC2A13	114134	solute carrier family 2 member 13	HMIT	10023	-0.419977	2.20594	-1.60072	0.122684	0.739171	-4.9949
chr1	1785285	1891117	-	ENSG00000078369.18	protein_coding	GNB1	2782	G protein subunit beta 1	MRD42	6417	0.122323	8.28324	1.6006	0.122712	0.739171	-6.08329
chr16	70661204	70686053	-	ENSG00000132613.15	protein_coding	MTSS2	92154	MTSS I-BAR domain containing 2	ABBA|ABBA-1|ABBA1|MTSS1L	4986	-0.735401	0.409308	-1.60052	0.122729	0.739171	-4.58008
chr19	812488	821955	-	ENSG00000129951.19	protein_coding	PLPPR3	79948	phospholipid phosphatase related 3	LPPR3|LPR3|PRG-2|PRG2	2719	1.48022	-0.839043	1.60035	0.122767	0.739171	-4.35027
chr3	32391698	32483067	+	ENSG00000153551.14	protein_coding	CMTM7	112616	CKLF like MARVEL transmembrane domain containing 7	CKLFSF7	3724	-0.170707	6.34046	-1.59989	0.122869	0.739171	-5.97914
chr8	98117293	98159835	+	ENSG00000104356.11	protein_coding	POP1	10940	POP1 homolog, ribonuclease P/MRP subunit	ANXD2	4857	-0.35428	3.26226	-1.59982	0.122883	0.739171	-5.28795
chr19	47113274	47210636	+	ENSG00000142230.13	protein_coding	SAE1	10055	SUMO1 activating enzyme subunit 1	AOS1|HSPC140|SUA1|UBLE1A	3742	-0.137767	6.42036	-1.59973	0.122903	0.739171	-5.99313
chr3	48688003	48740353	-	ENSG00000068745.15	protein_coding	IP6K2	51447	inositol hexakisphosphate kinase 2	IHPK2|InsP6K2|PIUS	5624	0.223792	6.13866	1.60002	0.122935	0.739171	-5.95313
chr5	179911651	180072113	-	ENSG00000113269.14	protein_coding	RNF130	55819	ring finger protein 130	G1RZFP|GOLIATH|GP	12817	0.229804	4.44336	1.59941	0.122975	0.739171	-5.62387
chr1	33081104	33123492	+	ENSG00000142920.17	protein_coding	AZIN2	113451	antizyme inhibitor 2	ADC|AZI2|AZIB1|ODC-p|ODC1L|ODCp	9581	0.379536	3.21024	1.59931	0.122999	0.739171	-5.30596
chr12	130789600	130839266	-	ENSG00000111450.14	protein_coding	STX2	2054	syntaxin 2	EPIM|EPM|STX2A|STX2B|STX2C	3723	-0.213916	6.51417	-1.59922	0.123018	0.739171	-5.98056
chr1	36466043	36483278	-	ENSG00000119535.18	protein_coding	CSF3R	1441	colony stimulating factor 3 receptor	CD114|GCSFR|SCN7	8429	1.64843	0.945254	1.61654	0.123156	0.739435	-4.53899
chr1	42682418	42703805	+	ENSG00000065978.19	protein_coding	YBX1	4904	Y-box binding protein 1	BP-8|CBF-A|CSDA2|CSDB|DBPB|EFI-A|MDR-NF1|NSEP-1|NSEP1|YB-1|YB1	3395	-0.145281	7.7566	-1.59846	0.123187	0.739435	-6.07063
chr9	4662294	4665258	+	ENSG00000205808.7	protein_coding	PLPP6	403313	phospholipid phosphatase 6	PDP1|PPAPDC2|PSDP|bA6J24.6	2965	-0.428825	4.26325	-1.60686	0.123336	0.739955	-5.51767
chr17	6578147	6640711	-	ENSG00000198920.11	protein_coding	KIAA0753	9851	KIAA0753	MNR|OFIP	5553	0.211388	4.78378	1.59746	0.123411	0.740026	-5.69868
chr16	28379579	28403841	-	ENSG00000205609.13	protein_coding	EIF3CL	728689	eukaryotic translation initiation factor 3 subunit C like	-	3053	0.410436	2.29165	1.59688	0.123539	0.740421	-4.99194
chr22	28883572	29057488	+	ENSG00000183579.16	protein_coding	ZNRF3	84133	zinc and ring finger 3	BK747E2.3|RNF203	6989	-0.581288	1.71159	-1.59646	0.123634	0.740612	-4.85239
chr10	125719515	125764143	+	ENSG00000107938.18	protein_coding	EDRF1	26098	erythroid differentiation regulatory factor 1	C10orf137	7741	0.156388	6.50504	1.59576	0.123791	0.740647	-5.99079
chr2	201233443	201287711	+	ENSG00000064012.22	protein_coding	CASP8	841	caspase 8	ALPS2B|CAP4|Casp-8|FLICE|MACH|MCH5	7243	-0.357221	7.95276	-1.62239	0.123895	0.740647	-6.04083
chr6	36871870	36928964	+	ENSG00000198663.17	protein_coding	C6orf89	221477	chromosome 6 open reading frame 89	BRAP|PS1TP5TP1	7330	0.129141	7.32683	1.59498	0.123965	0.740647	-6.05807
chr15	74836118	74843346	-	ENSG00000140474.14	protein_coding	ULK3	25989	unc-51 like kinase 3	-	3514	-0.142031	7.38196	-1.59493	0.123977	0.740647	-6.06105
chr12	56334174	56340410	+	ENSG00000110944.9	protein_coding	IL23A	51561	interleukin 23 subunit alpha	IL-23|IL-23A|IL23P19|P19|SGRF	1178	-0.415543	3.78188	-1.59788	0.12404	0.740647	-5.44241
chr12	120710458	120723640	+	ENSG00000175970.11	protein_coding	UNC119B	84747	unc-119 lipid binding chaperone B	POC7B	5172	0.183617	5.53393	1.5946	0.12405	0.740647	-5.85942
chr2	165087526	165204050	-	ENSG00000153253.19	protein_coding	SCN3A	6328	sodium voltage-gated channel alpha subunit 3	EIEE62|FFEVF4|NAC3|Nav1.3	11566	1.40279	-1.10319	1.59428	0.124121	0.740647	-4.41574
chr2	99284238	99304742	-	ENSG00000144214.10	protein_coding	LYG1	129530	lysozyme g1	SALW1939	1114	-0.447422	1.66178	-1.59398	0.124189	0.740647	-4.89705
chr3	10164919	10243745	+	ENSG00000134070.5	protein_coding	IRAK2	3656	interleukin 1 receptor associated kinase 2	IRAK-2	3431	0.42185	2.47075	1.59391	0.124205	0.740647	-5.10471
chr3	111592900	111595346	-	ENSG00000177494.6	protein_coding	ZBED2	79413	zinc finger BED-type containing 2	-	2214	0.95754	1.52977	1.60353	0.124514	0.741698	-4.83946
chrX	119615724	119693370	-	ENSG00000125354.23	protein_coding	SEPTIN6	23157	septin 6	SEP2|SEPT2|SEPT6	6245	-0.170574	9.43582	-1.59223	0.124583	0.741698	-6.11168
chr17	44170447	44179084	+	ENSG00000161664.7	protein_coding	ASB16	92591	ankyrin repeat and SOCS box containing 16	-	2233	0.421625	2.77988	1.59204	0.124625	0.741698	-5.19202
chr9	69121264	69274615	+	ENSG00000119139.21	protein_coding	TJP2	9414	tight junction protein 2	C9DUPq21.11|DFNA51|DUP9q21.11|PFIC4|X104|ZO2	15243	-0.546976	2.17247	-1.59198	0.12464	0.741698	-5.03213
chr3	8775402	8963773	-	ENSG00000070950.10	protein_coding	RAD18	56852	RAD18 E3 ubiquitin protein ligase	RNF73	6984	-0.267936	4.60805	-1.59096	0.124868	0.741698	-5.68324
chr12	69359710	69390870	+	ENSG00000127337.7	protein_coding	YEATS4	8089	YEATS domain containing 4	4930573H17Rik|B230215M10Rik|GAS41|NUBI-1|YAF9	1781	-0.202527	4.65952	-1.59087	0.124889	0.741698	-5.67761
chr10	26697701	26746798	+	ENSG00000148459.16	protein_coding	PDSS1	23590	decaprenyl diphosphate synthase subunit 1	COQ1|COQ10D2|COQ1A|DPS|SPS|TPRT|TPT|TPT 1|hDPS1	1913	-0.320381	3.03852	-1.59053	0.124966	0.741698	-5.26201
chr12	122752824	122771064	+	ENSG00000139726.11	protein_coding	DENR	8562	density regulated re-initiation and release factor	DRP|DRP1|SMAP-3	3526	0.146049	6.20426	1.59003	0.125078	0.741698	-5.95775
chr11	6612768	6619448	-	ENSG00000166340.17	protein_coding	TPP1	1200	tripeptidyl peptidase 1	CLN2|GIG1|LPIC|SCAR7|TPP-1	6502	0.185156	6.6989	1.58978	0.125136	0.741698	-6.02892
chr11	837356	842529	-	ENSG00000177700.6	protein_coding	POLR2L	5441	RNA polymerase II, I and III subunit L	RBP10|RPABC5|RPB10|RPB10beta|RPB7.6|hRPB7.6	1126	0.244232	4.2174	1.58972	0.125148	0.741698	-5.61574
chr14	88005135	88014811	+	ENSG00000140030.6	protein_coding	GPR65	8477	G protein-coupled receptor 65	TDAG8|hTDAG8	4511	0.399695	3.55125	1.58948	0.125203	0.741698	-5.33603
chr5	56815549	56896152	+	ENSG00000095015.6	protein_coding	MAP3K1	4214	mitogen-activated protein kinase kinase kinase 1	MAPKKK1|MEKK|MEKK 1|MEKK1|SRXY6	7741	-0.222863	8.71271	-1.59443	0.125262	0.741698	-6.09827
chrX	130124666	130165879	-	ENSG00000156709.15	protein_coding	AIFM1	9131	apoptosis inducing factor mitochondria associated 1	AIF|AUNX1|CMT2D|CMTX4|COWCK|COXPD6|DFNX5|NADMR|NAMSD|PDCD8|SEMDHL	13092	-0.170469	5.30481	-1.58917	0.125272	0.741698	-5.84965
chr13	98142562	98455176	+	ENSG00000152767.17	protein_coding	FARP1	10160	FERM, ARH/RhoGEF and pleckstrin domain protein 1	CDEP|FARP1-IT1|PLEKHC2|PPP1R75	36232	-0.429197	3.12329	-1.58871	0.125378	0.741698	-5.303
chr2	38561969	38603586	-	ENSG00000143889.16	protein_coding	HNRNPLL	92906	heterogeneous nuclear ribonucleoprotein L like	HNRPLL|SRRF	5932	-0.265119	4.22324	-1.58867	0.125387	0.741698	-5.58637
chr1	6247353	6261098	-	ENSG00000158292.7	protein_coding	GPR153	387509	G protein-coupled receptor 153	PGR1	4198	1.19774	-0.79831	1.5886	0.125402	0.741698	-4.42781
chr9	132261356	132354986	-	ENSG00000107290.14	protein_coding	SETX	23064	senataxin	ALS4|AOA2|SCAN2|SCAR1|Sen1|bA479K20.2	12141	0.189666	8.15484	1.58816	0.125501	0.741698	-6.09681
chr22	30396941	30425303	+	ENSG00000100003.18	protein_coding	SEC14L2	23541	SEC14 like lipid binding 2	C22orf6|SPF|TAP|TAP1	5887	-0.217109	4.54117	-1.58766	0.125614	0.741698	-5.65392
chr3	44648732	44660791	+	ENSG00000169981.11	protein_coding	ZNF35	7584	zinc finger protein 35	HF.10|HF10|Zfp105	2658	-0.634852	0.969595	-1.58725	0.125708	0.741698	-4.73382
chr3	44874608	44914990	+	ENSG00000163810.12	protein_coding	TGM4	7047	transglutaminase 4	TGP|hTGP	5443	-0.7479	0.544624	-1.58722	0.125714	0.741698	-4.57938
[truncated: 9,797 more rows]

## Sheet: Table S4B
Table S4B. Differential gene expression analysis between Progressors and Non-progressors at the ‘At clinical diagnosis’ time point in Progressors, in CD8+ T cells
seqnames	start	end	strand	gene_id	gene_type	gene_name	EntrezID	description	Synonyms	Length	logFC	AveExpr	t	P.Value	adj.P.Val	B
chr11	74807739	74949200	-	ENSG00000166435.15	protein_coding	XRRA1	143570	X-ray radiation resistance associated 1	-	9086	1.00696	3.70456	6.64309	1.81113e-06	0.0167055	4.44693
chr3	119211732	119240946	-	ENSG00000121578.13	protein_coding	B4GALT4	8702	beta-1,4-galactosyltransferase 4	B4Gal-T4|beta4Gal-T4	6988	0.764178	4.41376	6.43484	2.82037e-06	0.0167055	4.10539
chr3	78597239	79767998	-	ENSG00000169855.20	protein_coding	ROBO1	6091	roundabout guidance receptor 1	DUTT1|SAX3	11059	-1.76671	4.11466	-6.44764	3.83595e-06	0.0167055	3.84352
chr1	154325553	154351304	+	ENSG00000143515.18	protein_coding	ATP8B2	57198	ATPase phospholipid transporting 8B2	ATPID	7622	-0.398039	8.82554	-5.66494	1.52057e-05	0.0493782	2.77793
chrX	48831096	48835610	-	ENSG00000102109.9	protein_coding	PCSK1N	27344	proprotein convertase subtilisin/kexin type 1 inhibitor	BigLEN|PEN|PROSAAS|SAAS|SCG8|SgVIII	1338	-0.788711	3.43803	-5.56788	1.88971e-05	0.0493782	2.60367
chr3	32105689	32168709	+	ENSG00000152642.11	protein_coding	GPD1L	23171	glycerol-3-phosphate dehydrogenase 1 like	GPD1-L	4697	-0.724467	5.05517	-5.31565	3.33987e-05	0.0727257	2.14413
chrX	153444720	153470587	-	ENSG00000183479.12	protein_coding	TREX2	11219	three prime repair exonuclease 2	-	2715	-0.742741	2.75212	-4.79433	0.000110409	0.153251	1.16682
chr9	3824127	4348392	-	ENSG00000107249.23	protein_coding	GLIS3	169792	GLIS family zinc finger 3	NDH|ZNF515	11978	-1.43335	1.13383	-4.74131	0.000124831	0.153251	1.06561
chr17	50693198	50707914	-	ENSG00000154945.7	protein_coding	ANKRD40	91369	ankyrin repeat domain 40	-	4831	0.35423	5.47288	4.718	0.00013176	0.153251	1.02103
chr1	117001750	117036476	+	ENSG00000134256.12	protein_coding	CD101	9398	CD101 molecule	EWI-101|IGSF2|V7	3828	-0.830901	4.17875	-4.71639	0.000132252	0.153251	1.01796
chr4	102630770	102760994	-	ENSG00000109323.11	protein_coding	MANBA	4126	mannosidase beta	MANB1	11743	-0.445668	5.88939	-4.70859	0.000134668	0.153251	1.00301
chr11	124747474	124752255	-	ENSG00000019102.12	protein_coding	VSIG2	23584	V-set and immunoglobulin domain containing 2	2210413P10Rik|CTH|CTXL	1447	-2.01355	-0.57225	-4.68952	0.000140759	0.153251	0.966481
chr1	27959588	27968093	+	ENSG00000158156.9	protein_coding	XKR8	55113	XK related 8	XRG8|hXkr8	5180	0.572749	4.10191	4.65098	0.000153933	0.154703	0.892537
chr6	79631329	79703655	+	ENSG00000198478.8	protein_coding	SH3BGRL2	83699	SH3 domain binding glutamate rich protein like 2	-	4603	-1.91596	2.16667	-4.6457	0.000174108	0.16248	0.795364
chr19	40421589	40425992	-	ENSG00000197019.5	protein_coding	SERTAD1	29950	SERTA domain containing 1	SEI1|TRIP-Br1|TRIPBR1	2084	1.88954	3.60635	4.68139	0.000194845	0.166704	0.710395
chr3	114314500	115147288	-	ENSG00000181722.17	protein_coding	ZBTB20	26137	zinc finger and BTB domain containing 20	DPZF|HOF|ODA-8S|PRIMS|ZNF288	32008	-0.644339	5.00483	-4.52957	0.000204153	0.166704	0.658724
chr1	232950605	232983882	+	ENSG00000135778.12	protein_coding	NTPCR	84284	nucleoside-triphosphatase, cancer-related	C1orf57|HCR-NTPase|THEP1	15854	-1.03943	5.54262	-4.57374	0.000230169	0.174812	0.570256
chr11	124752583	124762290	-	ENSG00000149564.12	protein_coding	ESAM	90952	endothelial cell adhesion molecule	W117m	2920	-1.60263	0.255307	-4.45863	0.000240844	0.174812	0.521549
chr9	85941146	86025462	+	ENSG00000135040.16	protein_coding	NAA35	60560	N-alpha-acetyltransferase 35, NatC auxiliary subunit	EGAP|MAK10|MAK10P|bA379P1.1	6805	-0.388179	5.95672	-4.37955	0.000289644	0.181392	0.368164
chr8	73972437	73982783	+	ENSG00000175606.11	protein_coding	TMEM70	54968	transmembrane protein 70	MC5DN2	2982	0.456845	3.87944	4.37255	0.000294417	0.181392	0.354566
chr11	2400488	2403878	+	ENSG00000184281.15	protein_coding	TSSC4	10078	tumor suppressing subtransferable candidate 4	-	2659	0.556433	5.33547	4.36045	0.000302847	0.181392	0.331071
chr9	113373419	113376999	-	ENSG00000119431.9	protein_coding	HDHD3	81932	haloacid dehalogenase like hydrolase domain containing 3	2810435D12Rik|C9orf158	2105	-0.404162	4.62106	-4.3568	0.000305444	0.181392	0.323964
chr19	34677639	34686397	+	ENSG00000089335.21	protein_coding	ZNF302	55900	zinc finger protein 302	HSD16|MST154|MSTP154|ZNF135L|ZNF140L|ZNF327	5032	-0.432838	6.35095	-4.33397	0.000322166	0.183004	0.279586
chr8	30578318	30658236	-	ENSG00000197265.9	protein_coding	GTF2E2	2961	general transcription factor IIE subunit 2	FE|TF2E2|TFIIE-B|TTD6	2580	0.390588	4.63937	4.25052	0.000391529	0.183402	0.117068
chr1	212565334	212620777	+	ENSG00000162772.17	protein_coding	ATF3	467	activating transcription factor 3	-	4040	2.04674	-0.887258	4.21515	0.000425276	0.183402	0.0480825
chr19	46466491	46471563	-	ENSG00000182013.18	protein_coding	PNMA8A	55228	PNMA family member 8A	PNMAL1	3696	4.37796	0.648122	4.35959	0.000426244	0.183402	0.0694901
chr9	133250401	133276024	-	ENSG00000175164.15	protein_coding	ABO	28	ABO, alpha 1-3-N-acetylgalactosaminyltransferase and alpha 1-3-galactosyltransferase	A3GALNT|A3GALT1|GTB|NAGAT	6477	5.45921	0.13115	4.3777	0.000426947	0.183402	0.0707613
chr11	3000922	3057613	-	ENSG00000110619.18	protein_coding	CARS1	833	cysteinyl-tRNA synthetase 1	CARS|CYSRS|MCDDBH|MDBH|MGC:11246	10037	-1.2256	3.14048	-4.22765	0.000433778	0.183402	0.0352969
chr8	80034745	80231232	-	ENSG00000076554.15	protein_coding	TPD52	7163	tumor protein D52	D52|N8L|PC-1|PrLZ|hD52	8197	-0.993371	4.27123	-4.23828	0.000436589	0.183402	0.0322475
chr1	51577179	51798427	+	ENSG00000117859.19	protein_coding	OSBPL9	114883	oxysterol binding protein like 9	ORP-9|ORP9	10273	-0.232215	6.3253	-4.1742	0.000468012	0.183402	-0.0318656
chr3	52903572	53046750	-	ENSG00000163935.14	protein_coding	SFMBT1	51460	Scm like with four mbt domains 1	RU1|SFMBT|hSFMBT	5681	-0.523984	5.53367	-4.17216	0.000470246	0.183402	-0.0358425
chr12	48328980	48330279	+	ENSG00000187166.1	protein_coding	H1-7	341567	H1.7 linker histone	H1.7|H1FNT|H1T2	1300	-1.25129	0.686033	-4.16964	0.000473026	0.183402	-0.0407662
chr4	102501331	102617302	+	ENSG00000109320.13	protein_coding	NFKB1	4790	nuclear factor kappa B subunit 1	CVID12|EBP-1|KBF1|NF-kB|NF-kB1|NF-kappa-B1|NF-kappaB|NF-kappabeta|NFKB-p105|NFKB-p50|NFkappaB	6359	-0.372625	7.53481	-4.14597	0.000499946	0.183402	-0.0870076
chr10	4987400	5018031	-	ENSG00000151632.17	protein_coding	AKR1C2	1646	aldo-keto reductase family 1 member C2	AKR1C-pseudo|BABP|DD|DD-2|DD/BABP|DD2|DDH2|HAKRD|HBAB|MCDR2|SRXY8|TDD	6461	-1.46076	0.152675	-4.14463	0.000501519	0.183402	-0.0896326
chr19	52860851	52897693	-	ENSG00000182986.14	protein_coding	ZNF320	162967	zinc finger protein 320	ZFPL	11302	0.454921	5.37535	4.14278	0.00050369	0.183402	-0.093242
chr19	40393766	40414793	-	ENSG00000105227.16	protein_coding	PRX	57716	periaxin	CMT4F	7402	0.632564	3.19215	4.14137	0.000505356	0.183402	-0.0960001
chr2	148875227	149026759	+	ENSG00000168280.17	protein_coding	KIF5C	3800	kinesin family member 5C	CDCBM2|KINN|NKHC|NKHC-2|NKHC2	9238	-0.989769	1.99322	-4.09457	0.000563817	0.193837	-0.18751
chr11	65833834	65856896	+	ENSG00000172803.18	protein_coding	SNX32	254122	sorting nexin 32	SNX6B	3773	0.769184	2.24799	4.06974	0.000597524	0.193837	-0.236076
chr7	155644451	155781485	+	ENSG00000184863.11	protein_coding	RBM33	155435	RNA binding motif protein 33	PRR8	13132	-0.259718	8.42887	-4.06783	0.00060019	0.193837	-0.239801
chr19	9959561	10010504	-	ENSG00000080573.7	protein_coding	COL5A3	50509	collagen type V alpha 3 chain	-	6783	-3.61858	0.594038	-4.1624	0.000604171	0.193837	-0.226116
chr7	144355288	144380632	+	ENSG00000050327.15	protein_coding	ARHGEF5	7984	Rho guanine nucleotide exchange factor 5	GEF5|P60|TIM|TIM1	5818	-0.649366	3.37323	-4.0621	0.00060829	0.193837	-0.251015
chr6	29941260	29945884	+	ENSG00000206503.13	protein_coding	HLA-A	3105	major histocompatibility complex, class I, A	HLAA	2710	-1.58339	6.83967	-4.22034	0.000635035	0.194138	-0.253319
chr9	15163622	15307360	-	ENSG00000155158.20	protein_coding	TTC39B	158219	tetratricopeptide repeat domain 39B	C9orf52	12208	-0.508124	7.63055	-4.03985	0.000643129	0.194138	-0.29728
chr19	55399745	55407788	-	ENSG00000108106.14	protein_coding	UBE2S	27338	ubiquitin conjugating enzyme E2 S	E2-EPF|E2EPF|EPF5	2799	0.752424	2.95605	4.03124	0.000653812	0.194138	-0.311409
chr19	38730187	38769904	-	ENSG00000182472.9	protein_coding	CAPN12	147968	calpain 12	-	5966	-1.15254	1.77252	-4.01016	0.000686852	0.199416	-0.352679
chr17	3510502	3557812	-	ENSG00000167723.15	protein_coding	TRPV3	162514	transient receptor potential cation channel subfamily V member 3	FNEPPK2|OLMS|VRL3	9597	2.00524	0.955048	4.00793	0.000713872	0.202755	-0.381776
chr5	180590105	180591499	-	ENSG00000161055.4	protein_coding	SCGB3A1	92304	secretoglobin family 3A member 1	HIN-1|HIN1|LU105|PnSP-2|UGRP2	803	4.97109	-0.862348	4.06949	0.000737259	0.204942	-0.392562
chr1	232983435	233295725	-	ENSG00000135749.19	protein_coding	PCNX2	80003	pecanex 2	PCNXL2	13827	-0.31608	6.50268	-3.95409	0.00078307	0.207847	-0.462482
chr16	31393335	31426505	+	ENSG00000156886.12	protein_coding	ITGAD	3681	integrin subunit alpha D	ADB2|CD11D	4388	3.40551	1.40181	4.07538	0.000787178	0.207847	-0.439955
chr5	178204533	178211163	+	ENSG00000197451.12	protein_coding	HNRNPAB	3182	heterogeneous nuclear ribonucleoprotein A/B	ABBP1|HNRPAB	2118	0.302273	6.33042	3.94739	0.000795433	0.207847	-0.475607
chr15	44711487	44718877	+	ENSG00000166710.20	protein_coding	B2M	567	beta-2-microglobulin	IMD43	6079	0.733086	9.92761	3.9761	0.000819179	0.209854	-0.490594
chr1	224175756	224193441	+	ENSG00000143753.13	protein_coding	DEGS1	8560	delta 4-desaturase, sphingolipid 1	DEGS|DEGS-1|DES1|Des-1|FADS7|HLD18|MIG15|MLD	2446	0.441409	5.41338	3.89622	0.000896483	0.220681	-0.575841
chr19	47113274	47210636	+	ENSG00000142230.13	protein_coding	SAE1	10055	SUMO1 activating enzyme subunit 1	AOS1|HSPC140|SUA1|UBLE1A	3742	-0.353181	6.1231	-3.88772	0.000914453	0.220681	-0.59248
chr13	110712736	110723339	+	ENSG00000153487.13	protein_coding	ING1	3621	inhibitor of growth family member 1	p24ING1c|p33|p33ING1|p33ING1b|p47|p47ING1a	6093	0.415408	4.70823	3.88539	0.00091944	0.220681	-0.59704
chr1	204218853	204377665	-	ENSG00000143850.16	protein_coding	PLEKHA6	22874	pleckstrin homology domain containing A6	PEPP-3|PEPP3	9656	1.26822	-0.321581	3.86465	0.000965079	0.220681	-0.637664
chr6	26114873	26123926	-	ENSG00000180596.7	protein_coding	H2BC4	8347	H2B clustered histone 4	H2B.1|H2B/l|H2BC10|H2BC6|H2BC7|H2BC8|H2BFL|HIST1H2BC|dJ221C16.3	834	1.89264	0.408113	3.85369	0.000990105	0.220681	-0.659134
chr6	31494881	31511124	+	ENSG00000204516.10	protein_coding	MICB	4277	MHC class I polypeptide-related sequence B	PERB11.2	2798	1.07992	1.36173	3.84227	0.00101686	0.220681	-0.681499
chr12	50057548	50083611	+	ENSG00000110881.12	protein_coding	ASIC1	41	acid sensing ion channel subunit 1	ACCN2|ASIC|BNaC2	5745	-0.738654	3.9049	-3.83956	0.00102332	0.220681	-0.686812
chr12	103770453	103841234	-	ENSG00000111696.12	protein_coding	NT5DC3	51559	5'-nucleotidase domain containing 3	TU12B1-TY|TU12B1TY	8759	-0.526646	3.88863	-3.83659	0.00103044	0.220681	-0.692624
chr7	98106862	98209638	+	ENSG00000164715.6	protein_coding	LMTK2	22853	lemur tyrosine kinase 2	AATYK2|BREK|KPI-2|KPI2|LMR2|PPP1R100|cprk|hBREK	9167	-0.375815	6.7109	-3.83393	0.00103686	0.220681	-0.697834
chr17	80134369	80147151	-	ENSG00000141543.12	protein_coding	EIF4A3	9775	eukaryotic translation initiation factor 4A3	DDX48|Fal1|MUK34|NMP265|NUK34|RCPS|eIF-4A-III|eIF4A-III|eIF4AIII	5780	0.495735	5.3306	3.83067	0.00104477	0.220681	-0.704213
chr7	12330885	12403941	-	ENSG00000146530.14	protein_coding	VWDE	221806	von Willebrand factor D and EGF domains	-	6712	-3.48864	0.310531	-3.89681	0.0010728	0.220681	-0.706694
chr13	41061509	41084006	+	ENSG00000120688.9	protein_coding	WBP4	11193	WW domain binding protein 4	FBP21	2388	0.332456	4.09491	3.8184	0.00107513	0.220681	-0.728241
chr2	39664982	39717963	+	ENSG00000152154.11	protein_coding	TMEM178A	130733	transmembrane protein 178A	TMEM178	2472	-1.59069	-0.329916	-3.8131	0.00108851	0.220681	-0.73862
chr19	53467733	53496255	+	ENSG00000198346.11	protein_coding	ZNF813	126017	zinc finger protein 813	-	6246	-0.445313	4.29118	-3.80265	0.0011154	0.220681	-0.759093
chr5	139475533	139482935	-	ENSG00000184584.13	protein_coding	STING1	340061	stimulator of interferon response cGAMP interactor 1	ERIS|MITA|MPYS|NET23|SAVI|STING|STING-beta|TMEM173|hMITA|hSTING	4798	0.304072	6.83832	3.79547	0.00113422	0.220681	-0.773139
chr4	103077592	103099870	-	ENSG00000164039.15	protein_coding	BDH2	56898	3-hydroxybutyrate dehydrogenase 2	DHRS6|EFA6R|PRO20933|SDR15C1|UCPA-OR|UNQ6308	5213	0.449353	4.80822	3.7887	0.00115229	0.220681	-0.786398
chr1	226989865	227318474	-	ENSG00000143776.18	protein_coding	CDC42BPA	8476	CDC42 binding protein kinase alpha	MRCK|MRCKA|PK428	14055	-1.61359	0.239414	-3.78132	0.00117231	0.220681	-0.800853
chr11	11956207	12009769	-	ENSG00000050165.18	protein_coding	DKK3	27122	dickkopf WNT signaling pathway inhibitor 3	REIC|RIG	11958	-1.45802	2.20417	-3.79779	0.00118055	0.220681	-0.801398
chr2	241106099	241150264	-	ENSG00000115687.14	protein_coding	PASK	23178	PAS domain containing serine/threonine kinase	PASKIN|STK37	10665	-0.682702	8.16776	-3.82396	0.0011836	0.220681	-0.796297
chr12	120469850	120498493	+	ENSG00000088986.11	protein_coding	DYNLL1	8655	dynein light chain LC8-type 1	DLC1|DLC8|DNCL1|DNCLC1|LC8|LC8a|PIN|hdlc1	2931	0.728198	4.6983	3.78485	0.00119926	0.220681	-0.816261
chr15	40470984	40473158	+	ENSG00000169105.8	protein_coding	CHST14	113189	carbohydrate sulfotransferase 14	ATCS|D4ST1|EDSMC1|HNK1ST	2175	0.525408	3.31459	3.75995	0.0012322	0.22113	-0.842673
chr5	79236131	79327211	+	ENSG00000152409.9	protein_coding	JMY	133746	junction mediating and regulatory protein, p53 cofactor	WHAMM2|WHDC1L3	9096	-0.268555	6.92773	-3.75366	0.00125042	0.22113	-0.854993
chr17	36088256	36090169	-	ENSG00000277632.2	protein_coding	CCL3	6348	C-C motif chemokine ligand 3	G0S19-1|LD78ALPHA|MIP-1-alpha|MIP1A|SCYA3	1494	2.05323	-1.9321	3.75295	0.00125248	0.22113	-0.856372
chr18	46476972	46657220	-	ENSG00000167210.17	protein_coding	LOXHD1	125336	lipoxygenase homology domains 1	DFNB77|LH2D1	9213	1.37447	-0.815892	3.70757	0.00139219	0.240495	-0.945153
chr3	196568611	196589059	+	ENSG00000174013.8	protein_coding	FBXO45	200933	F-box protein 45	Fbx45	5976	0.631181	3.38043	3.70084	0.00141421	0.240495	-0.958329
chr3	38496127	38542161	+	ENSG00000157036.13	protein_coding	EXOG	9941	exo/endonuclease G	ENDOGL1|ENDOGL2|ENGL|ENGL-a|ENGL-b|ENGLA|ENGLB	5575	-0.293434	5.65603	-3.69675	0.00142772	0.240495	-0.966315
chr19	49688664	49690575	+	ENSG00000224420.3	protein_coding	ADM5	199800	adrenomedullin 5 (putative)	AM5|C19orf76	1718	0.722864	2.89331	3.69312	0.00143986	0.240495	-0.973424
chr3	100334739	100361635	+	ENSG00000114021.12	protein_coding	NIT2	56954	nitrilase family member 2	HEL-S-8a	9226	-0.333336	5.86879	-3.68886	0.0014542	0.240495	-0.981744
chr12	50504985	50748657	+	ENSG00000066084.13	protein_coding	DIP2B	57609	disco interacting protein 2 homolog B	-	10351	-0.324603	6.80944	-3.67942	0.00148651	0.240869	-1.0002
chr2	241551424	241574131	+	ENSG00000176720.6	protein_coding	BOK	666	BCL2 family apoptosis regulator BOK	BCL2L9|BOKL	2680	1.39975	1.82391	3.67385	0.00152419	0.240869	-1.01965
chr5	176647387	176659054	+	ENSG00000048140.18	protein_coding	TSPAN17	26262	tetraspanin 17	FBX23|FBXO23|TM4SF17	5215	0.429502	5.67748	3.66793	0.0015268	0.240869	-1.02265
chr4	40056850	40158252	+	ENSG00000078177.14	protein_coding	N4BP2	55728	NEDD4 binding protein 2	B3BP	9811	-0.428784	6.37222	-3.66282	0.00154506	0.240869	-1.03264
chr17	82101460	82212830	-	ENSG00000176155.19	protein_coding	CCDC57	284001	coiled-coil domain containing 57	-	12394	-0.35355	7.2124	-3.66144	0.00155003	0.240869	-1.03534
chr6	32968594	32981505	+	ENSG00000204256.13	protein_coding	BRD2	6046	bromodomain containing 2	BRD2-IT1|D6S113E|FSH|FSRG1|NAT|O27.1.1|RING3|RNF3	7403	0.439963	6.02465	3.64788	0.00159973	0.240869	-1.06184
chr1	205083129	205084460	-	ENSG00000174529.7	protein_coding	TMEM81	388730	transmembrane protein 81	HC3107|KVLA2788|UNQ2788	1332	1.24561	0.864491	3.64738	0.00160159	0.240869	-1.06282
chr6	96521595	96555276	+	ENSG00000014123.10	protein_coding	UFL1	23376	UFM1 specific ligase 1	KIAA0776|Maxer|NLBP|RCAD	4539	-0.317281	6.83462	-3.64674	0.00160395	0.240869	-1.06406
chrX	84058346	84188199	-	ENSG00000072133.11	protein_coding	RPS6KA6	27330	ribosomal protein S6 kinase A6	PP90RSK4|RSK-4|RSK4|S6K-alpha-6|p90RSK6	8794	-1.63715	-1.09536	-3.63974	0.00163028	0.242041	-1.07773
chr3	38453890	38493142	+	ENSG00000114739.14	protein_coding	ACVR2B	93	activin A receptor type 2B	ACTRIIB|ActR-IIB|HTX4	15705	-0.644525	5.54397	-3.65484	0.00165866	0.242148	-1.08526
chr5	138465479	138469303	+	ENSG00000120738.8	protein_coding	EGR1	1958	early growth response 1	AT225|G0S30|KROX-24|NGFI-A|TIS8|ZIF-268|ZNF225	3137	1.42083	2.33082	3.65334	0.00166807	0.242148	-1.08972
chr3	194685883	194689037	+	ENSG00000185112.6	protein_coding	FAM43A	131583	family with sequence similarity 43 member A	-	3155	1.26668	2.57811	3.63146	0.00173195	0.244204	-1.12296
chr14	69484692	69531551	+	ENSG00000175985.10	protein_coding	PLEKHD1	400224	pleckstrin homology and coiled-coil domain containing D1	UPF0639	8097	1.23144	-0.270343	3.61209	0.00173853	0.244204	-1.13173
chr8	143833583	143840973	-	ENSG00000185189.18	protein_coding	NRBP2	340371	nuclear receptor binding protein 2	TRG16|pp9320	4934	-0.475471	5.63098	-3.60841	0.00175345	0.244204	-1.1389
chr16	11254408	11256204	-	ENSG00000185338.6	protein_coding	SOCS1	8651	suppressor of cytokine signaling 1	CIS1|CISH1|JAB|SOCS-1|SSI-1|SSI1|TIP-3|TIP3	1797	1.44308	4.3189	3.70394	0.0017617	0.244204	-1.11337
chr1	61742477	62178675	+	ENSG00000132849.21	protein_coding	PATJ	10207	PATJ crumbs cell polarity complex component	Cipp|INADL|InaD-like|hINADL	11919	-0.352591	5.92797	-3.59248	0.00181954	0.244204	-1.16998
chr12	56521820	56596193	+	ENSG00000076067.13	protein_coding	RBMS2	5939	RNA binding motif single stranded interacting protein 2	SCR3	8914	-0.69432	3.04579	-3.59085	0.00182645	0.244204	-1.17317
chr20	63639705	63657682	-	ENSG00000197457.10	protein_coding	STMN3	50861	stathmin 3	SCLIP	3029	-0.49432	8.12123	-3.59756	0.00183471	0.244204	-1.17416
chr1	236549005	236604516	-	ENSG00000119285.11	protein_coding	HEATR1	55127	HEAT repeat containing 1	BAP28|UTP10	9061	-0.297718	6.64982	-3.58463	0.001853	0.244204	-1.18529
chr22	42160013	42343616	-	ENSG00000100207.19	protein_coding	TCF20	6942	transcription factor 20	AR1|DDVIBA|SPBP|TCF-20	7893	-0.233928	6.10327	-3.57182	0.00190897	0.244204	-1.21029
chr3	50354750	50359521	-	ENSG00000126062.4	protein_coding	TMEM115	11070	transmembrane protein 115	PL6	2107	0.46637	4.34862	3.56956	0.00191898	0.244204	-1.21468
chr7	141656728	141702166	-	ENSG00000257093.7	protein_coding	DENND11	57189	DENN domain containing 11	KIAA1147|LCHN|PRO2561	7369	-0.247269	6.83449	-3.56169	0.00195436	0.244204	-1.23003
chr7	21900899	21945903	-	ENSG00000164649.20	protein_coding	CDCA7L	55536	cell division cycle associated 7 like	JPO2|R1|RAM2	3894	-0.481553	4.85885	-3.55619	0.00197946	0.244204	-1.24075
chr1	27872543	27886685	+	ENSG00000130775.16	protein_coding	THEMIS2	9473	thymocyte selection associated family member 2	C1orf38|ICB-1|ICB1	4621	0.784494	5.76012	3.60705	0.00198437	0.244204	-1.22604
chr20	32192504	32207743	-	ENSG00000126003.7	protein_coding	PLAGL2	5326	PLAG1 like zinc finger 2	ZNF900	5656	0.417087	4.48872	3.55188	0.00199935	0.244204	-1.24915
chr14	76151916	76254342	+	ENSG00000089916.18	protein_coding	GPATCH2L	55668	G-patch domain containing 2 like	C14orf118	21987	-0.264691	7.39194	-3.5491	0.00201227	0.244204	-1.25456
chr20	25452697	25585531	-	ENSG00000101004.15	protein_coding	NINL	22981	ninein like	NLP	6030	0.652372	3.49876	3.54471	0.00203287	0.244204	-1.26312
chr9	122264603	122331337	+	ENSG00000148187.18	protein_coding	MRRF	92399	mitochondrial ribosome recycling factor	MRFF|MTRRF|RRF	11035	-0.28235	6.02344	-3.54385	0.00203694	0.244204	-1.26479
chr1	149390614	149468030	+	ENSG00000286219.1	protein_coding	NOTCH2NLC	100996717	notch 2 N-terminal like C	ETM6|N2N|NIID|NOTCH2NL|NOTCH2NLA	5343	-0.515536	4.98667	-3.54317	0.00204013	0.244204	-1.26611
chr4	83535914	83605875	+	ENSG00000138678.11	protein_coding	GPAT3	84803	glycerol-3-phosphate acyltransferase 3	AGPAT 10|AGPAT10|AGPAT8|AGPAT9|HMFN0839|LPAAT-theta|MAG1	3623	-1.49323	-0.182385	-3.53186	0.00209434	0.244204	-1.28814
chr8	23020133	23069031	-	ENSG00000120889.13	protein_coding	TNFRSF10B	8795	TNF receptor superfamily member 10b	CD262|DR5|KILLER|KILLER/DR5|TRAIL-R2|TRAILR2|TRICK2|TRICK2A|TRICK2B|TRICKB|ZTNFR9	5010	-0.408086	5.98154	-3.53066	0.0021002	0.244204	-1.29049
chr4	37453925	37623495	+	ENSG00000154274.15	protein_coding	C4orf19	55286	chromosome 4 open reading frame 19	-	4470	-1.43598	-0.474421	-3.52047	0.00215036	0.244204	-1.31031
chr12	92140278	92145846	-	ENSG00000133639.6	protein_coding	BTG1	694	BTG anti-proliferation factor 1	APRO2	4855	0.338842	9.83743	3.5199	0.00215321	0.244204	-1.31143
chr4	51993702	52017620	-	ENSG00000188993.3	protein_coding	LRRC66	339977	leucine rich repeat containing 66	-	3327	-1.36121	-0.717481	-3.51876	0.00215891	0.244204	-1.31365
chr22	42617840	42649392	-	ENSG00000100243.21	protein_coding	CYB5R3	1727	cytochrome b5 reductase 3	B5R|DIA1	5797	0.309688	5.74323	3.5161	0.00217227	0.244204	-1.31883
chr16	30698209	30741409	+	ENSG00000080603.17	protein_coding	SRCAP	10847	Snf2 related CREBBP activator protein	DOMO1|EAF1|FLHS|SWR1	13644	-0.346367	5.03874	-3.51027	0.0022018	0.244204	-1.33017
chr1	8945867	8975092	+	ENSG00000131686.15	protein_coding	CA6	765	carbonic anhydrase 6	CA-VI|GUSTIN	2662	-0.573063	5.97605	-3.52837	0.00220329	0.244204	-1.32446
chr5	132875395	132963634	-	ENSG00000072364.13	protein_coding	AFF4	27125	AF4/FMR2 family member 4	AF5Q31|CHOPS|MCEF	11281	-0.259439	7.74604	-3.49812	0.00226461	0.244204	-1.3538
chr1	161215234	161220699	+	ENSG00000158869.11	protein_coding	FCER1G	2207	Fc fragment of IgE receptor Ig	FCRG	964	-0.83026	2.62204	-3.48857	0.00231521	0.244204	-1.37236
chr5	180494379	180578358	+	ENSG00000113300.13	protein_coding	CNOT6	57472	CCR4-NOT transcription complex subunit 6	CCR4|Ccr4a	6572	0.382407	6.28459	3.48596	0.00232926	0.244204	-1.37745
chr12	66135846	66170072	-	ENSG00000155957.18	protein_coding	TMBIM4	51643	transmembrane BAX inhibitor motif containing 4	CGI-119|GAAP|LFG4|S1R|ZPRO	4137	-0.42294	4.95711	-3.48494	0.00233475	0.244204	-1.37942
chr6	131699644	131701401	-	ENSG00000180658.4	protein_coding	OR2A4	79541	olfactory receptor family 2 subfamily A member 4	OR2A10	1758	-0.826497	1.96259	-3.48386	0.0023406	0.244204	-1.38153
chr20	5114953	5126626	-	ENSG00000132646.11	protein_coding	PCNA	5111	proliferating cell nuclear antigen	ATLD2	1403	0.659444	5.24325	3.50488	0.00234454	0.244204	-1.37537
chr1	235447190	235504452	-	ENSG00000162885.14	protein_coding	B3GALNT2	148789	beta-1,3-N-acetylgalactosaminyltransferase 2	B3GalNAc-T2|MDDGA11	10279	-0.403724	3.98577	-3.48301	0.00234522	0.244204	-1.38318
chr2	197500140	197503449	+	ENSG00000115541.11	protein_coding	HSPE1	3336	heat shock protein family E (Hsp10) member 1	CPN10|EPF|GROES|HSP10	1823	0.345742	5.05765	3.48269	0.00234694	0.244204	-1.3838
chr18	21242242	21525417	+	ENSG00000141449.14	protein_coding	GREB1L	80000	GREB1 like retinoic acid receptor coactivator	C18orf6|KIAA1772|RHDA3	10572	-1.20777	0.772995	-3.47808	0.00237213	0.244204	-1.39277
chr16	3500976	3539048	+	ENSG00000103351.13	protein_coding	CLUAP1	23059	clusterin associated protein 1	CFAP22|FAP22|IFT38	7746	0.454126	5.53148	3.47782	0.00237355	0.244204	-1.39327
chr6	80003887	80042527	+	ENSG00000112742.10	protein_coding	TTK	7272	TTK protein kinase	CT96|ESK|MPH1|MPS1|MPS1L1|PYT	4579	1.63901	-0.464368	3.4773	0.0023764	0.244204	-1.39428
chr7	116525001	116561184	+	ENSG00000105974.12	protein_coding	CAV1	857	caveolin 1	BSCL3|CGL3|LCCNS|MSTP085|PPH3|VIP21	3866	1.72913	-0.106919	3.471	0.00241131	0.244204	-1.40653
chr3	124080023	124726325	+	ENSG00000160145.15	protein_coding	KALRN	8997	kalirin RhoGEF kinase	ARHGEF24|CHD5|CHDS5|DUET|DUO|HAPIP|TRAD	24490	-1.40614	0.0226386	-3.46789	0.00242868	0.244204	-1.41256
chr5	62306162	62391025	+	ENSG00000068796.19	protein_coding	KIF2A	3796	kinesin family member 2A	CDCBM3|HK2|KIF2	13050	-0.325196	8.16824	-3.46768	0.00242989	0.244204	-1.41298
chr3	15206152	15252916	+	ENSG00000131375.10	protein_coding	CAPN7	23473	calpain 7	CALPAIN7|PALBH	5596	-0.357295	6.86995	-3.46421	0.00244943	0.244288	-1.4197
chrX	130171962	130184870	+	ENSG00000134594.5	protein_coding	RAB33A	9363	RAB33A, member RAS oncogene family	RabS10	945	0.797529	2.41899	3.45133	0.00252346	0.249765	-1.44472
chr2	100820139	100996829	+	ENSG00000170485.17	protein_coding	NPAS2	4862	neuronal PAS domain protein 2	MOP4|PASD4|bHLHe9	12504	-0.647098	4.86881	-3.45142	0.00259696	0.255108	-1.46431
chr1	15247272	15400283	+	ENSG00000142621.19	protein_coding	FHAD1	114827	forkhead associated phosphopeptide binding domain 1	-	12805	2.29203	-1.0914	3.42799	0.00266329	0.257912	-1.49002
chr8	97273488	97277928	-	ENSG00000180543.5	protein_coding	TSPYL5	85453	TSPY like 5	-	4441	-0.854134	2.22012	-3.42394	0.00268827	0.257912	-1.49786
chr1	25242249	25338213	-	ENSG00000117616.18	protein_coding	RSRP1	57035	arginine and serine rich protein 1	C1orf63|NPD014	6730	0.240546	8.69846	3.42274	0.00269574	0.257912	-1.50019
chr9	34638133	34651035	+	ENSG00000213930.12	protein_coding	GALT	2592	galactose-1-phosphate uridylyltransferase	-	4407	-0.274765	6.45707	-3.42134	0.00270448	0.257912	-1.50291
chr19	14072536	14075062	+	ENSG00000141854.9	protein_coding	MISP3	113230	MISP family member 3	-	2354	1.59544	-0.597549	3.41247	0.00276042	0.260351	-1.5201
chr3	58008400	58172251	+	ENSG00000136068.15	protein_coding	FLNB	2317	filamin B	ABP-278|ABP-280|AOI|FH1|FLN-B|FLN1L|LRS1|SCT|TABP|TAP	13952	-0.494194	7.47092	-3.42529	0.00276991	0.260351	-1.51771
chrX	103376395	103378164	+	ENSG00000166681.14	protein_coding	BEX3	27018	brain expressed X-linked 3	Bex|DXS6984E|HGR74|NADE|NGFRAP1	1112	-0.395822	4.19071	-3.39943	0.00284467	0.265469	-1.54535
chr20	50190830	50192668	+	ENSG00000172216.6	protein_coding	CEBPB	1051	CCAAT enhancer binding protein beta	C/EBP-beta|IL6DBP|NF-IL6|TCF5	1839	0.458498	5.5507	3.39387	0.00288141	0.26699	-1.55613
chr8	22687659	22693480	-	ENSG00000179388.9	protein_coding	EGR3	1960	early growth response 3	EGR-3|PILOT	5033	1.11349	0.588158	3.38734	0.00292507	0.269127	-1.56876
chr3	46921726	46982010	-	ENSG00000160799.11	protein_coding	CCDC12	151903	coiled-coil domain containing 12	-	4754	0.362125	4.7452	3.37704	0.00299537	0.273668	-1.5887
chrX	56818298	56995827	-	ENSG00000204271.13	protein_coding	SPIN3	169981	spindlin family member 3	SPIN-3|TDRD27|bA445O16.1	15841	-0.477303	4.98551	-3.37072	0.0030393	0.274717	-1.60093
chr6	99432325	99521728	-	ENSG00000123552.18	protein_coding	USP45	85015	ubiquitin specific peptidase 45	LCA19	8105	-0.493083	5.0227	-3.36935	0.0030489	0.274717	-1.60358
chr7	144312464	144322668	+	ENSG00000221970.2	protein_coding	OR2A1	346528	olfactory receptor family 2 subfamily A member 1	-	4632	-0.689814	3.27398	-3.35492	0.00315184	0.278772	-1.63146
chr20	56358974	56368663	+	ENSG00000124098.10	protein_coding	FAM210B	116151	family with sequence similarity 210 member B	5A3|C20orf108|dJ1167H4.1	3518	-0.412179	5.08418	-3.35075	0.00318228	0.278772	-1.63953
chr14	23555988	23560271	+	ENSG00000259431.6	protein_coding	THTPA	79178	thiamine triphosphatase	THTP|THTPASE	2894	-0.342723	3.47286	-3.34755	0.00320578	0.278772	-1.64571
chr7	130344816	130368730	+	ENSG00000158525.15	protein_coding	CPA5	93979	carboxypeptidase A5	-	2965	-1.49738	2.2864	-3.3791	0.00321222	0.278772	-1.63499
chr9	69820817	69906227	+	ENSG00000204711.9	protein_coding	C9orf135	138255	chromosome 9 open reading frame 135	-	1250	-2.5313	0.167276	-3.37632	0.00322762	0.278772	-1.63925
chr17	81110487	81166221	-	ENSG00000181409.14	protein_coding	AATK	9625	apoptosis associated tyrosine kinase	AATYK|AATYK1|LMR1|LMTK1|PPP1R77|p35BP	13177	1.15675	0.754384	3.34349	0.00323583	0.278772	-1.65355
chr1	30931506	31065991	-	ENSG00000134644.16	protein_coding	PUM1	9698	pumilio RNA binding family member 1	HSPUM|PUMH|PUMH1|PUML1|SCA47	6621	-0.244915	7.43805	-3.3425	0.00324327	0.278772	-1.65547
chr4	185363879	185395899	-	ENSG00000109771.15	protein_coding	LRP2BP	55805	LRP2 binding protein	-	7360	0.767659	2.08634	3.33365	0.00330993	0.281169	-1.67255
chrX	333933	386955	-	ENSG00000167393.18	protein_coding	PPP2R3B	28227	protein phosphatase 2 regulatory subunit B''beta	NYREN8|PPP2R3L|PPP2R3LY|PR48|PR70	9045	-0.446723	3.54299	-3.33067	0.00333269	0.281169	-1.67831
chr2	38743599	38751494	-	ENSG00000115875.19	protein_coding	SRSF7	6432	serine and arginine rich splicing factor 7	9G8|AAG3|SFRS7	4045	0.40111	8.61768	3.33027	0.00333572	0.281169	-1.67907
chr3	42489299	42537573	+	ENSG00000114812.13	protein_coding	VIPR1	7433	vasoactive intestinal peptide receptor 1	HVR1|II|PACAP-R-2|PACAP-R2|RDC1|V1RG|VAPC1|VIP-R-1|VIPR|VIRG|VPAC1|VPAC1R|VPCAP1R	7384	-0.641921	6.44383	-3.35842	0.0034157	0.284846	-1.68401
chr17	76142465	76240493	-	ENSG00000141576.16	protein_coding	RNF157	114804	ring finger protein 157	-	7913	-0.467408	6.45384	-3.32644	0.00342295	0.284846	-1.69781
chr7	128297685	128343908	-	ENSG00000106344.8	protein_coding	RBM28	55131	RNA binding motif protein 28	ANES	15866	-0.211033	6.38519	-3.30983	0.00349616	0.28696	-1.71851
chr15	90930180	90954093	+	ENSG00000140553.18	protein_coding	UNC45A	55898	unc-45 myosin chaperone A	GC-UNC45|GCUNC-45|GCUNC45|IRO039700|SMAP-1|SMAP1|UNC-45A	7498	0.420821	5.88423	3.30913	0.00350174	0.28696	-1.71985
chr12	47079603	47236662	+	ENSG00000179715.13	protein_coding	PCED1B	91523	PC-esterase domain containing 1B	FAM113B	2618	-0.480485	7.95285	-3.32073	0.00351424	0.28696	-1.71761
chr17	30906344	30959322	+	ENSG00000184060.11	protein_coding	ADAP2	55803	ArfGAP with dual PH domains 2	CENTA2|HSA272195|cent-b	3750	1.60895	-0.719701	3.30263	0.00355437	0.287289	-1.73237
chr7	149195546	149226238	+	ENSG00000170265.12	protein_coding	ZNF282	8427	zinc finger protein 282	HUB1	3761	0.370701	4.52907	3.29508	0.00361651	0.287289	-1.74692
chr15	34851782	34969742	-	ENSG00000021776.11	protein_coding	AQR	9716	aquarius intron-binding spliceosomal factor	IBP160|fSAP164	13431	-0.2085	6.89896	-3.29493	0.0036178	0.287289	-1.74722
chr1	161229666	161238244	-	ENSG00000143257.12	protein_coding	NR1I3	9970	nuclear receptor subfamily 1 group I member 3	CAR|CAR1|MB67	3247	-1.27612	-0.084362	-3.28384	0.00371099	0.287289	-1.76856
chr14	104681146	104722535	+	ENSG00000203485.14	protein_coding	INF2	64423	inverted formin 2	C14orf151|C14orf173|CMTDIE|FSGS5|pp9484	13627	-1.23322	7.0925	-3.38228	0.00374594	0.287289	-1.73679
chr6	111299028	111483715	-	ENSG00000009413.16	protein_coding	REV3L	5980	REV3 like, DNA directed polymerase zeta catalytic subunit	POLZ|REV3	12425	-0.23535	6.1799	-3.27492	0.00378766	0.287289	-1.78573
chr14	70907405	71115382	+	ENSG00000100731.16	protein_coding	PCNX1	22990	pecanex 1	PCNX|PCNXL1|pecanex	16715	-0.282354	7.87033	-3.27379	0.00379745	0.287289	-1.78789
chr2	11677595	11827409	+	ENSG00000134324.12	protein_coding	LPIN1	23175	lipin 1	PAP1	11861	0.267703	7.4459	3.26969	0.00383336	0.287289	-1.79579
chr9	111631334	111654351	+	ENSG00000059769.20	protein_coding	DNAJC25	548645	DnaJ heat shock protein family (Hsp40) member C25	bA16L21.2.1	2604	0.463657	3.0686	3.26798	0.0038484	0.287289	-1.79907
chr5	157029413	157059119	-	ENSG00000113249.13	protein_coding	HAVCR1	26762	hepatitis A virus cellular receptor 1	CD365|HAVCR|HAVCR-1|KIM-1|KIM1|TIM|TIM-1|TIM1|TIMD-1|TIMD1	2151	-0.76358	2.50349	-3.26761	0.00385162	0.287289	-1.79978
chr7	102913000	102945111	+	ENSG00000128606.13	protein_coding	LRRC17	10234	leucine rich repeat containing 17	P37NB	2827	-1.14253	-0.772218	-3.25732	0.00394348	0.287289	-1.81956
chr6	27146361	27146855	-	ENSG00000197903.8	protein_coding	H2BC12	85236	H2B clustered histone 12	H2B/S|H2BFAiii|H2BFT|H2BK|HIST1H2BK	495	0.911744	2.83175	3.25625	0.00396238	0.287289	-1.82315
chr7	120950763	120977216	+	ENSG00000071243.16	protein_coding	ING3	54556	inhibitor of growth family member 3	Eaf4|ING2|MEAF4|p47ING3	5200	0.365631	5.27908	3.25248	0.00398742	0.287289	-1.82885
chr6	25279078	25620530	+	ENSG00000079691.18	protein_coding	CARMIL1	55604	capping protein regulator and myosin 1 linker 1	CARMIL|CARMIL1a|LRRC16|LRRC16A|dJ501N12.1|dJ501N12.5	6853	-0.562097	4.38521	-3.25097	0.00400125	0.287289	-1.83176
chr19	16324826	16328685	+	ENSG00000127528.6	protein_coding	KLF2	10365	Kruppel like factor 2	LKLF	2820	0.360177	9.96129	3.2497	0.00401288	0.287289	-1.83419
chr12	56468578	56479708	+	ENSG00000176422.14	protein_coding	SPRYD4	283377	SPRY domain containing 4	-	10769	-0.41095	4.20899	-3.24877	0.00402141	0.287289	-1.83597
chr4	73571550	73620631	-	ENSG00000169435.14	protein_coding	RASSF6	166824	Ras association domain family member 6	-	6630	1.54969	-0.39116	3.24807	0.00402791	0.287289	-1.83733
chr21	14961235	15065936	-	ENSG00000180530.11	protein_coding	NRIP1	8204	nuclear receptor interacting protein 1	CAKUT3|RIP140	8497	-0.316067	6.31629	-3.2469	0.00403871	0.287289	-1.83958
chr2	27625639	27629012	-	ENSG00000176714.9	protein_coding	CCDC121	79635	coiled-coil domain containing 121	-	2844	0.957893	0.142902	3.24572	0.00404959	0.287289	-1.84183
chr2	112055269	112119318	+	ENSG00000153214.11	protein_coding	TMEM87B	84910	transmembrane protein 87B	-	5321	-0.279495	6.02403	-3.24476	0.00405858	0.287289	-1.84369
chr18	51174550	51218333	-	ENSG00000176624.12	protein_coding	MEX3C	51320	mex-3 RNA binding family member C	BM-013|MEX-3C|RKHD2|RNF194	7871	0.349268	6.58246	3.2444	0.0040619	0.287289	-1.84438
chr4	17614641	17634105	+	ENSG00000118579.13	protein_coding	MED28	80306	mediator complex subunit 28	1500003D12Rik|EG1|magicin	10972	-0.351515	6.71178	-3.24415	0.00406417	0.287289	-1.84485
chr2	15166914	15561334	-	ENSG00000151779.13	protein_coding	NBAS	51594	NBAS subunit of NRZ tethering complex	ILFS2|NAG|SOPH	8947	-0.260493	5.77872	-3.24348	0.00407048	0.287289	-1.84615
[truncated: 12,882 more rows]

## Sheet: Table S4C
Table S4C. Differential gene expression analysis between Progressors and Non-progressors at the ‘At clinical diagnosis’ time point in Progressors, in B cells
[truncated: 12,702 more rows]

[truncated: 1 more sheets: Table S4D]
